# Supplementary material for: Heterogeneity and Risk of Bias in Studies Examining Risk Factors for Severe Illness and Death in COVID-19: A Systematic Review and Meta-Analysis
Source: MDPI journal article supplement (doi:10.3390/pathogens11050563), 2022-05-10
Supplement: s1 [file s1]

# **Heterogeneity and risk of bias in studies examining risk factors for severe illness and death in COVID-19: a systematic review and meta-analysis**

Abraham Degarege \*, Zaeema Naveed, Josiane Kabayundo, David Brett-Major

**Table S7: Forest plot showing the relationship of cardiovascular disease with the odds of severe illness among COVID-19 patients**

| <b>Author, year</b>                 | <b>OR</b> | <b>LCI</b> | <b>UCI</b> | <b>% Weight</b> |
|-------------------------------------|-----------|------------|------------|-----------------|
| Algado-Sellés et al., 2020          | 2.30      | 0.40       | 12.10      | 0.12            |
| Allenbach et al., 2020              | 1.44      | 0.65       | 3.20       | 2.09            |
| Alqahtani et al., 2020              | 4.51      | 1.09       | 18.67      | 0.05            |
| Al-Samkari et al., 2020             | 0.90      | 0.58       | 1.41       | 8.02            |
| Bauer et al., 2020                  | 1.72      | 1.09       | 2.70       | 4.16            |
| Betti et al., 2021                  | 0.38      | 0.09       | 1.50       | 4.91            |
| Bhargava et al., 2020               | 1.68      | 0.76       | 3.71       | 1.63            |
| Bravi et al., 2020                  | 1.88      | 1.32       | 2.70       | 5.03            |
| Cai et al., 2020                    | 3.49      | 1.71       | 7.12       | 0.54            |
| Cen et al., 2020                    | 2.36      | 1.35       | 4.11       | 1.83            |
| Chen Z et al., 2020                 | 3.15      | 1.9        | 5.23       | 1.32            |
| Cheng et al., 2020                  | 1.33      | 0.32       | 6.00       | 0.49            |
| Cizmecioglu et al., 2020            | 1.90      | 0.23       | 15.58      | 0.07            |
| Colaneri et al., 2020               | 2.40      | 0.59       | 9.63       | 0.2             |
| Deng et al., 2020                   | 2.01      | 0.59       | 6.77       | 0.42            |
| Du et al., 2020                     | 0.68      | 0.30       | 1.52       | 5.77            |
| Du et al., 2020                     | 0.68      | 0.30       | 1.52       | 5.77            |
| Feng et al., 2020                   | 2.50      | 1.27       | 4.92       | 1.12            |
| Ghaffari et al., 2021               | 1.42      | 0.78       | 2.58       | 3.57            |
| Guan et al., 2020                   | 2.84      | 1.62       | 4.96       | 1.31            |
| Jinag N et al., 2021                | 3.53      | 0.98       | 12.64      | 0.12            |
| Kaeuffer et al., 2020               | 0.88      | 0.6        | 1.31       | 8.81            |
| Khan et a., 2020                    | 4.30      | 1.76       | 10.51      | 0.21            |
| Li T et al., 2020                   | 2.65      | 1.60       | 4.40       | 1.79            |
| Molinero et al., 2020               | 0.86      | 0.43       | 1.71       | 5.48            |
| Nachega et al., 2020                | 7.77      | 3.49       | 17.28      | 0.09            |
| Nie Y et al., 2020                  | 0.81      | 0.31       | 2.14       | 3.49            |
| Ouldali et al., 2021                | 2.10      | 0.10       | 13.10      | 0.10            |
| Qin et al., 2020                    | 4.97      | 1.47       | 19.79      | 0.05            |
| Ren et al., 2020                    | 4.63      | 0.41       | 52.63      | 0.01            |
| Sadeghi-Haddad-Zavareh et al., 2020 | 0.74      | 0.47       | 1.17       | 8.88            |
| Shahriarirad et al., 2020           | 4.29      | 1.09       | 16.84      | 0.07            |
| Shao et al., 2020                   | 1.26      | 0.22       | 7.23       | 0.33            |
| Shi et al., 2020                    | 5.47      | 1.54       | 19.41      | 0.05            |
| Soleimani et al., 2020              | 1.02      | 0.58       | 1.81       | 5.72            |
| Tian et al., 2020                   | 1.14      | 0.28       | 4.68       | 0.79            |
| Tong et al., 2020                   | 8.29      | 0.65       | 104.89     | 0.00            |
| Vee et al., 2020                    | 20.7      | 4.57       | 94.04      | 0.00            |
| Wang et al., 2021                   | 4.60      | 0.78       | 27.20      | 0.02            |
| Wang Junhong et al., 2020           | 1.10      | 0.44       | 2.71       | 2.52            |
| Wang Sijiao et al., 2020            | 2.51      | 0.45       | 13.85      | 0.09            |
| Wang Wen et al., 2021               | 4.68      | 1.16       | 18.93      | 0.05            |

|                                         |             |             |             |               |
|-----------------------------------------|-------------|-------------|-------------|---------------|
| Wang Wenjun et al., 2021                | 1.96        | 1.41        | 2.73        | 5.30          |
| Wang X et al., 2020                     | 4.75        | 1.59        | 14.18       | 0.10          |
| Wei et al., 2020                        | 3.56        | 1.25        | 10.13       | 0.20          |
| Wei Z et al., 2021                      | 1.08        | 0.25        | 4.62        | 0.80          |
| Xie Y et al., 2020                      | 3.34        | 1.12        | 9.94        | 0.21          |
| Xiong et al., 2020                      | 2.77        | 0.98        | 7.86        | 0.34          |
| Xiong S et al., 2020                    | 4.41        | 1.34        | 14.49       | 0.09          |
| Yang Q. et al., 2020                    | 7.41        | 1.74        | 31.57       | 0.02          |
| Yu et al., 2020                         | 4.20        | 1.20        | 14.20       | 0.10          |
| Yu Y. et al., 2020                      | 0.91        | 0.24        | 3.37        | 1.47          |
| Zhang et al., 2020                      | 4.30        | 1.07        | 17.20       | 0.06          |
| Zhang et al., 2020                      | 11.5        | 0.98        | 134.40      | 0.00          |
| Zhang Hongmei et al., 2020              | 2.55        | 0.25        | 25.86       | 0.03          |
| Zhang Hongyan et al., 2020              | 2.55        | 0.75        | 8.73        | 0.25          |
| Zhang L et al., 2020                    | 1.64        | 0.50        | 5.10        | 0.73          |
| Zhang Q et al., 2020                    | 3.54        | 1.02        | 12.24       | 0.13          |
| Zhang Y et al., 2021                    | 1.13        | 0.50        | 2.52        | 3.02          |
| Zhao J et al., 2021                     | 6.25        | 1.77        | 22.09       | 0.04          |
| Zhou Y et al., 2020                     | 123.63      | 7.99        | 7441.61     | 0.00          |
| <b>Total (I squared=20.5%, p=0.086)</b> | <b>1.27</b> | <b>1.07</b> | <b>1.47</b> | <b>100.00</b> |
