# Supplementary material for: Heterogeneity and Risk of Bias in Studies Examining Risk Factors for Severe Illness and Death in COVID-19: A Systematic Review and Meta-Analysis
Source: MDPI journal article supplement (doi:10.3390/pathogens11050563), 2022-05-10
Supplement: s1 [file s1]

# **Heterogeneity and risk of bias in studies examining risk factors for severe illness and death in COVID-19: a systematic review and meta-analysis**

Abraham Degarege \*, Zaeema Naveed, Josiane Kabayundo, David Brett-Major

**Table S9: Forest plot showing the relationship of diabetes with the odds of severe illness among COVID-19 patients**

| <b>Author, year</b>      | <b>OR</b> | <b>LCI</b> | <b>UCI</b> |
|--------------------------|-----------|------------|------------|
| Abbas et al., 2020       | 1.97      | 1.09       | 3.53       |
| Aiswarya et al., 2020    | 1.3       | 0.41       | 4.15       |
| Allard et al., 2020      | 1.38      | 0.61       | 3.13       |
| Alqahtani et al., 2020   | 18.45     | 9.28       | 36.69      |
| Al-Samkari et al., 2020  | 1.98      | 1.28       | 3.06       |
| Alsharidah et al., 2021  | 0.95      | 0.62       | 1.48       |
| Basaran et al., 2021     | 3.58      | 1.44       | 8.89       |
| Basaran et al., 2021     | 3.57      | 1.43       | 8.89       |
| Bauer et al., 2020       | 1.47      | 1.06       | 2.04       |
| Betti et al., 2021       | 0.71      | 0.19       | 2.61       |
| Bhargava et al., 2020    | 2.91      | 1.62       | 5.25       |
| Bolouri et al., 2021     | 2.11      | 0.71       | 6.27       |
| Bravi et al., 2020       | 1.52      | 1.05       | 2.18       |
| Cabello et al., 2021     | 6.14      | 1.01       | 37.21      |
| Cai et al., 2020         | 4.28      | 1.78       | 10.28      |
| Cekerevac et al., 2021   | 1.39      | 0.61       | 3.19       |
| Cen et al., 2020         | 3.8       | 2.51       | 5.74       |
| Chen at al., 2020        | 2.63      | 0.86       | 8.05       |
| Chen Z et al., 2020      | 1.06      | 0.7        | 1.59       |
| Cheng et al., 2020       | 1.74      | 0.58       | 5.02       |
| Cizmecioglu et al., 2020 | 1.25      | 0.27       | 5.76       |
| Colaneri et al., 2020    | 0.21      | 0.02       | 2          |
| Deng et al., 2020        | 2.11      | 0.7        | 6.35       |
| Du et al., 2020          | 1.43      | 0.63       | 3.22       |
| Du et al., 2020          | 1.43      | 0.63       | 3.22       |
| Duan et al., 2020        | 3.93      | 0.79       | 19.58      |
| Feng et al., 2020        | 1.58      | 0.84       | 2.97       |
| Gao et al., 2020         | 16.53     | 2.07       | 132.2      |
| Ghaffari et al., 2021    | 1.78      | 1.07       | 2.98       |
| Gostner et al., 2020     | 6.46      | 0.68       | 61.16      |
| Guan et al., 2020        | 3.16      | 2.14       | 4.67       |
| Hu et al., 2021          | 4.78      | 1.16       | 19.75      |
| Hu et al., 2020          | 2.32      | 1.19       | 4.53       |
| Huang et al., 2020       | 8.14      | 2.84       | 23.34      |
| Jain et al., 2021        | 1.29      | 0.35       | 4.78       |
| Ji et al., 2021          | 0.74      | 0.11       | 4.86       |
| Jinag N et al., 2021     | 3.31      | 1.12       | 9.75       |
| Kaeuffer et al., 2020    | 1.2       | 0.91       | 1.59       |

|                                     |      |       |        |
|-------------------------------------|------|-------|--------|
| Karahan et al., 2020                | 2.69 | 1.25  | 5.77   |
| Khan et al., 2020                   | 2.37 | 1.28  | 4.37   |
| Lara et al., 2020                   | 1.66 | 0.61  | 4.47   |
| Lee Y et al., 2020                  | 2.26 | 1.43  | 3.58   |
| Li et al., 2020                     | 1.91 | 1.18  | 3.1    |
| Li T et al., 2020                   | 1.64 | 1.02  | 2.65   |
| Liu J et al., 2021                  | 4.04 | 0.87  | 18.81  |
| Liu S et al., 2020                  | 1.64 | 0.52  | 5.22   |
| Molinero et al., 2020               | 1.7  | 1.07  | 2.74   |
| Nachega et al., 2020                | 5.15 | 3.36  | 7.89   |
| Nguyen et al., 2020                 | 1.77 | 1.03  | 3.03   |
| Pei et al., 2020                    | 2.63 | 1.49  | 4.63   |
| Pereira et al., 2020                | 1.43 | 0.58  | 3.54   |
| Qin et al., 2020                    | 1.48 | 0.86  | 2.55   |
| Ren et al., 2020                    | 1.89 | 0.65  | 5.48   |
| Sadeghi-Haddad-Zavareh et al., 2020 | 1.02 | 0.67  | 1.57   |
| Shahriarirad et al., 2020           | 2.57 | 0.6   | 10.93  |
| Shi et al., 2020                    | 3.15 | 1.27  | 7.81   |
| Siepmann et al., 2020               | 3.68 | 1.005 | 13.47  |
| Song et al., 2020                   | 2.7  | 0.33  | 21.83  |
| Stefan et al., 2020                 | 1.43 | 0.36  | 5.61   |
| Sun et al., 2020                    | 1.89 | 0.28  | 12.65  |
| Tao et al., 2020                    | 7.44 | 2.4   | 23.11  |
| Tessitore et al., 2021              | 2.9  | 1.7   | 5      |
| Tian et al., 2020                   | 0.81 | 0.43  | 1.51   |
| To et al., 2020                     | 1.37 | 0.15  | 11.93  |
| Vee et al., 2020                    | 56   | 15.5  | 202.31 |
| Villa et al., 2021                  | 0.75 | 0.12  | 4.66   |
| Vizcarra et al., 2020               | 0.44 | 0.05  | 4.09   |
| Wan et al., 2020                    | 8.9  | 2.26  | 34.9   |
| Wang et al., 2021                   | 2.13 | 0.59  | 7.68   |
| Wang Junhong et al., 2020           | 1.22 | 0.58  | 2.53   |
| Wang Sijiao et al., 2020            | 6.94 | 1.65  | 29.22  |
| Wang Wen et al., 2021               | 3.87 | 1     | 14.93  |
| Wang Wenjun et al., 2021            | 1.33 | 1.04  | 1.71   |
| Wang X. et al., 2020                | 3.36 | 1.38  | 8.15   |
| Wei et al., 2020                    | 1.01 | 0.47  | 2.15   |
| Wei Z et al., 2021                  | 2.85 | 1.35  | 6.01   |
| Xie Y et al., 2020                  | 8.33 | 1.99  | 34.87  |
| Xiong et al., 2020                  | 0.61 | 0.21  | 1.76   |
| Xiong S et al., 2020                | 1.66 | 0.61  | 4.48   |
| Yan et al., 2020                    | 4.77 | 2.15  | 10.56  |
| Yang Q et al., 2020                 | 4.04 | 1.51  | 10.86  |
| Yu et al., 2020                     | 1.1  | 0.3   | 3.6    |
| Yu Y et al., 2020                   | 1.95 | 0.71  | 5.36   |

|                                         |             |             |             |
|-----------------------------------------|-------------|-------------|-------------|
| Zachariah et al., 2020                  | 11.43       | 0.91        | 143.64      |
| Zhang Hongmei et al., 2020              | 1.68        | 0.26        | 25.86       |
| Zhang Hongyan et al., 2020              | 4.01        | 1.36        | 11.86       |
| Zhang Jing et al., 2020                 | 1.39        | 0.9         | 2.15        |
| Zhang Lijuan et al., 2020               | 1.18        | 0.37        | 3.73        |
| Zhang Nannan et al., 2021               | 1.24        | 0.13        | 11.75       |
| Zhang W. et al., 2021                   | 2.04        | 1.28        | 3.28        |
| Zhang Y. et al., 2021                   | 1.74        | 0.85        | 3.58        |
| Zhang, 2020                             | 17.6        | 4.84        | 63.98       |
| Zhao J. et al., 2021                    | 4.26        | 2.44        | 7.48        |
| Zheng B. et al., 2021                   | 3.25        | 0.87        | 12.18       |
| Zhou Jun et al., 2021                   | 2.1         | 0.7         | 6.68        |
| Zhou Yiwu et al., 2020                  | 1.73        | 0.28        | 8.62        |
| <b>Total (I squared=17.4%, p=0.079)</b> | <b>1.51</b> | <b>1.36</b> | <b>1.67</b> |
