# Supplementary material for: Heterogeneity and Risk of Bias in Studies Examining Risk Factors for Severe Illness and Death in COVID-19: A Systematic Review and Meta-Analysis
Source: MDPI journal article supplement (doi:10.3390/pathogens11050563), 2022-05-10
Supplement: s1 [file s1]

# **Heterogeneity and risk of bias in studies examining risk factors for severe illness and death in COVID-19: a systematic review and meta-analysis**

Abraham Degarege \*, Zaeema Naveed, Josiane Kabayundo, David Brett-Major

**Table S16: Forest plot showing the relationship of gender with the odds of death among COVID-19 patients**

| <b>Author, year</b>       | <b>OR</b> | <b>LCI</b> | <b>UCI</b> | <b>% Weight</b> |
|---------------------------|-----------|------------|------------|-----------------|
| Adamuz et al., 2020       | 1.86      | 1.11       | 3.11       | 0.27            |
| Ahmad et al., 2020        | 0.38      | 0.14       | 1.05       | 0.61            |
| Aiswarya et al., 2020     | 0.28      | 0.06       | 1.31       | 0.47            |
| Akhtar et al., 2021       | 0.85      | 0.53       | 1.36       | 0.65            |
| Alahmari et al., 2021     | 1.52      | 1.36       | 1.69       | 0.86            |
| Alasia et al., 2021       | 4.44      | 0.57       | 34.41      | 0.00            |
| Albalawi et al., 2021     | 0.48      | 0.2        | 1.16       | 0.59            |
| Albani et al., 2020       | 1.62      | 1.23       | 2.12       | 0.62            |
| Alberici et al., 2020     | 1.05      | 0.41       | 2.78       | 0.21            |
| Alfraij et al., 2021      | 2.25      | 0.19       | 25.36      | 0.00            |
| Alguwaihes et al., 2021   | 3.3       | 1.2        | 9.2        | 0.02            |
| Aliberti et al., 2021     | 1.25      | 1.01       | 1.56       | 0.77            |
| Allameh et al., 2020      | 1.39      | 0.82       | 2.35       | 0.38            |
| Almaghlouth et al., 2020  | 0.27      | 0.05       | 1.53       | 0.39            |
| Al-Rousan, 2020           | 1.14      | 0.97       | 1.35       | 0.84            |
| Alser et al., 2021        | 2.49      | 0.89       | 7          | 0.04            |
| Altschul et al., 2020     | 1.05      | 0.63       | 1.72       | 0.53            |
| Amanat et al., 2021       | 1.36      | 0.9        | 2.06       | 0.50            |
| Anakli et al., 2021       | 0.95      | 0.4        | 2.27       | 0.29            |
| Anantharamna et al., 2020 | 1.72      | 1.17       | 2.56       | 0.42            |
| Angelidi et al., 2021     | 2         | 0.47       | 8.63       | 0.02            |
| Angelis et al., 2020      | 2.12      | 0.86       | 5.18       | 0.07            |
| Aoun et al., 2021         | 1.16      | 0.63       | 2.14       | 0.38            |
| Atkins et al., 2020       | 2.12      | 1.45       | 3.09       | 0.35            |
| Auld et al., 2020         | 0.77      | 0.42       | 1.39       | 0.58            |
| Aw et al., 2020           | 2.02      | 1.47       | 2.77       | 0.45            |
| Azar et al., 2020         | 1.95      | 1.08       | 3.51       | 0.20            |
| Azwar et al., 2020        | 6.3       | 0.71       | 55.5       | 0.00            |
| Baggio et al., 2021       | 1.64      | 1.47       | 1.82       | 0.85            |
| Baqui et al., 2020        | 1.12      | 1.03       | 1.23       | 0.89            |
| Barbui et al., 2021       | 2.48      | 1.01       | 6.07       | 0.06            |
| Bartoletti et al., 2020   | 1.43      | 0.72       | 2.83       | 0.25            |
| Berenguer et al., 2020    | 1.57      | 1.35       | 1.82       | 0.81            |
| Bertsimas et al., 2020    | 1.46      | 1.23       | 1.73       | 0.80            |
| Betech et al., 2020       | 1.24      | 1.2        | 1.29       | 0.91            |
| Bhatt et al., 2021        | 1.26      | 1.13       | 1.4        | 0.88            |
| Bianchetti et al., 2020   | 1.15      | 0.78       | 1.66       | 0.62            |

|                              |      |      |       |      |
|------------------------------|------|------|-------|------|
| Bielza et al., 2021          | 1.56 | 1.07 | 2.28  | 0.49 |
| Botta et al., 2021           | 2.16 | 1.24 | 3.78  | 0.19 |
| Bottio et al., 2021          | 1.92 | 0.43 | 6.09  | 0.04 |
| Brenner et al., 2020         | 2.78 | 0.76 | 10.14 | 0.02 |
| Brouns et al., 2020          | 4.79 | 1.74 | 13.18 | 0.01 |
| Byeon et al., 2021           | 1.53 | 1.22 | 1.92  | 0.71 |
| Cabezudo-García et al., 2020 | 1.39 | 0.79 | 2.44  | 0.35 |
| Caillard et al., 2020        | 0.96 | 0.6  | 1.53  | 0.60 |
| Capdevila-Reniu et al., 2021 | 1.52 | 0.78 | 2.94  | 0.24 |
| Cariou et al., 2020          | 1.25 | 0.85 | 1.81  | 0.59 |
| Carubbi et al., 2021         | 0.83 | 0.12 | 5.41  | 0.05 |
| Castelnuovo et al., 2020     | 1.24 | 1.05 | 1.48  | 0.82 |
| Catteau et al., 2020         | 1.15 | 1.04 | 1.28  | 0.88 |
| Cen Y et al., 2020           | 2.81 | 1.42 | 5.53  | 0.08 |
| Chand et al., 2020           | 1.83 | 1.14 | 2.92  | 0.31 |
| Chang et al., 2020           | 2.02 | 0.84 | 4.82  | 0.09 |
| Chen J et al., 2020          | 2.27 | 1.72 | 2.94  | 0.48 |
| Chen L et al., 2020          | 0.81 | 0.49 | 1.34  | 0.64 |
| Chen T et al., 2020          | 5.33 | 1.32 | 21.52 | 0.00 |
| Chen Y et al., 2020          | 2.63 | 1.63 | 4.16  | 0.19 |
| Chilimuri et al., 2020       | 1.37 | 0.79 | 2.37  | 0.36 |
| Choron et al., 2021          | 2.26 | 1.01 | 2.61  | 0.36 |
| Choudhuri et al., 2020       | 1.88 | 1.37 | 2.59  | 0.48 |
| Ciceri et al., 2020          | 1.05 | 0.62 | 1.76  | 0.51 |
| Cinar et al., 2021           | 3.94 | 1.56 | 9.95  | 0.02 |
| COVID-ICU group, 2020        | 1.11 | 0.95 | 1.29  | 0.86 |
| Covino et al., 2020a         | 0.91 | 0.33 | 2.49  | 0.24 |
| Covino et al., 2020b         | 1.55 | 0.63 | 3.8   | 0.13 |
| Covino et al., 2020c         | 1.41 | 0.51 | 3.83  | 0.12 |
| Covino et al., 2021          | 1.05 | 0.52 | 2.13  | 0.36 |
| De Smet D et al., 2020       | 1.02 | 0.37 | 2.84  | 0.19 |
| De Smet R et al., 2020       | 1.07 | 0.38 | 3.05  | 0.17 |
| De Souza et al., 2020        | 0.65 | 0.57 | 0.74  | 0.90 |
| De Souza et al., 2021        | 1.79 | 1.25 | 2.58  | 0.44 |
| Deng G et al., 2020          | 1.6  | 1.48 | 1.92  | 0.82 |
| Del Amo et al., 2020         | 0.59 | 0.18 | 1.91  | 0.33 |
| Di Cosimo et al., 2021       | 1.67 | 0.97 | 2.91  | 0.28 |
| Du H et al., 2020            | 2.46 | 1.04 | 5.8   | 0.06 |
| Du H et al., 2020            | 2.46 | 1.04 | 5.8   | 0.06 |
| Duarte et al., 2020          | 0.84 | 0.61 | 1.15  | 0.78 |
| Duclos et al., 2021          | 1.53 | 0.12 | 18.8  | 0.00 |
| Elhadi et al., 2021          | 1.33 | 0.91 | 1.93  | 0.56 |
| Escobar et al., 2021         | 1.93 | 1.69 | 2.19  | 0.80 |
| Escosteguy et al., 2021      | 1.64 | 1.06 | 2.53  | 0.40 |
| Falcone et al., 2020         | 2.13 | 1.14 | 2.98  | 0.30 |

|                             |      |      |       |      |
|-----------------------------|------|------|-------|------|
| Fava et al., 2020           | 0.79 | 0.33 | 1.9   | 0.37 |
| Ferrando et al., 2020       | 0.93 | 0.65 | 1.32  | 0.72 |
| Ferrando-Vivas et al., 2021 | 1.3  | 1.19 | 1.42  | 0.89 |
| Ferrari et al., 2020        | 1.47 | 0.68 | 3.16  | 0.19 |
| Fox et al., 2020            | 1.36 | 0.62 | 2.99  | 0.21 |
| Foy et al., 2020            | 1.28 | 0.98 | 1.66  | 0.72 |
| Frontera et al., 2020       | 0.79 | 0.53 | 1.18  | 0.73 |
| Fu et al., 2020             | 1.14 | 0.36 | 3.56  | 0.13 |
| Galiero et al., 2020        | 2.63 | 1.42 | 4.9   | 0.11 |
| Giannoglou et al., 2020     | 1.46 | 0.88 | 2.43  | 0.37 |
| Goicoechea et al., 2020     | 0.56 | 0.13 | 2.41  | 0.22 |
| Gomez et al., 2021          | 1.96 | 1.34 | 2.9   | 0.37 |
| Goodall et al., 2020        | 1.02 | 0.78 | 1.34  | 0.77 |
| Grasselli et al., 2020      | 1.28 | 1.1  | 1.51  | 0.83 |
| Gu et al., 2020             | 2.12 | 1.35 | 3.33  | 0.27 |
| Guarneri et al., 2021       | 0.71 | 0.37 | 1.36  | 0.57 |
| Guo et al., 2020            | 1.92 | 1.56 | 2.36  | 0.66 |
| Gupta et al., 2020          | 1.5  | 1.19 | 1.9   | 0.70 |
| Haase et al., 2020          | 1.71 | 0.99 | 2.96  | 0.27 |
| Halvatsiotis et al., 2020   | 1.07 | 0.34 | 3.38  | 0.14 |
| Haq et al., 2020            | 0.36 | 0.16 | 0.82  | 0.72 |
| Hashemi et al., 2020        | 1.62 | 0.8  | 3.26  | 0.20 |
| Hatami et al., 2021         | 1.48 | 0.98 | 2.24  | 0.47 |
| Hendra et al., 2021         | 1.47 | 0.51 | 4.34  | 0.09 |
| Hu H et al., 2020           | 2.21 | 0.73 | 6.7   | 0.04 |
| Hu J et al., 2020           | 5.21 | 2.41 | 11.27 | 0.02 |
| Huang S et al., 2020        | 2.1  | 1.12 | 3.94  | 0.16 |
| Huang Y et al., 2020        | 6.5  | 1.41 | 29.9  | 0.00 |
| Hwang et al., 2020          | 1.82 | 0.73 | 4.15  | 0.11 |
| Iaccarino et al., 2020      | 1.87 | 1.41 | 2.3   | 0.62 |
| Iaccarino et al., 2020      | 1.13 | 0.82 | 1.56  | 0.69 |
| Incerti et al., 2021        | 1.28 | 1.17 | 1.41  | 0.88 |
| Inciardi et al., 2020       | 1.82 | 0.33 | 10.07 | 0.02 |
| Islam et al., 2020          | 1.79 | 0.71 | 4.54  | 0.09 |
| Jegade et al., 2020         | 0.82 | 0.34 | 2     | 0.34 |
| Jimeno et al., 2020         | 0.6  | 0.3  | 1.3   | 0.57 |
| Jose et al., 2021           | 0.59 | 0.36 | 0.94  | 0.76 |
| Jung et al., 2020           | 1.46 | 0.9  | 2.35  | 0.40 |
| Kaeuffer et al., 2020       | 1.7  | 1.1  | 2.7   | 0.36 |
| Karahan et al., 2020        | 1.46 | 0.76 | 2.81  | 0.26 |
| Karimi et al., 2020         | 1.76 | 0.36 | 8.55  | 0.02 |
| Karlsson et al., 2020       | 4    | 1.8  | 9.5   | 0.02 |
| Kaya et al., 2021           | 1.53 | 0.44 | 5.38  | 0.06 |
| Kim D et al., 2020          | 2.18 | 1.5  | 3.17  | 0.34 |
| Kim E et al., 2021          | 0.91 | 0.42 | 1.97  | 0.37 |

|                             |      |      |       |      |
|-----------------------------|------|------|-------|------|
| Kim S et al., 2020          | 2.16 | 1.59 | 2.94  | 0.44 |
| Krause et al., 2020         | 0.5  | 0.18 | 1.41  | 0.48 |
| Krishnan et al., 2020       | 1.19 | 0.61 | 2.33  | 0.33 |
| Kunal et al., 2020          | 0.91 | 0.38 | 2.2   | 0.30 |
| Kute et al., 2021           | 1.47 | 0.42 | 5.13  | 0.06 |
| Laake et al., 2020          | 0.67 | 0.38 | 1.19  | 0.66 |
| Lee J et al., 2021          | 2.12 | 1.47 | 3.12  | 0.35 |
| Lee L et al., 2020          | 1.67 | 1.19 | 2.34  | 0.51 |
| Lee S et al., 2020          | 2.31 | 1.58 | 3.37  | 0.31 |
| Leung et al., 2020          | 1.19 | 0.62 | 2.26  | 0.35 |
| Li G et al., 2020           | 1.85 | 1.23 | 2.8   | 0.37 |
| Li G et al., 2021           | 1.49 | 0.66 | 3.36  | 0.17 |
| Li K et al., 2020           | 2.22 | 0.65 | 7.69  | 0.03 |
| Lievre et al., 2020         | 1.61 | 1.25 | 2.08  | 0.65 |
| Ling et al., 2020           | 0.68 | 0.33 | 1.37  | 0.55 |
| Liu et al., 2020            | 1.51 | 0.94 | 2.45  | 0.38 |
| Llamas et al., 2021         | 1.61 | 1.04 | 2.51  | 0.40 |
| Long et al., 2020           | 0.77 | 0.31 | 1.92  | 0.36 |
| Lorente L et al, 2021a      | 0.48 | 0.19 | 1.23  | 0.55 |
| Lorente L et al., 2021b     | 0.52 | 0.12 | 2.2   | 0.25 |
| Louapre et al., 2020        | 2.11 | 1.23 | 3.63  | 0.20 |
| Lu Y et al., 2021           | 2.01 | 0.77 | 5.19  | 0.07 |
| Lucar et al., 2021          | 2.05 | 0.55 | 7.52  | 0.03 |
| Lunski et al., 2021         | 2.15 | 1.73 | 2.67  | 0.60 |
| Maguire et al., 2020        | 1.55 | 0.82 | 2.93  | 0.25 |
| Mak et al., 2020            | 1.48 | 1.13 | 1.94  | 0.66 |
| Marengoni et al., 2020      | 3.08 | 0.87 | 12.8  | 0.01 |
| Marouf et al., 2021         | 0.82 | 0.28 | 2.37  | 0.25 |
| Martinez-Lopez et al., 2020 | 3.8  | 1.7  | 8.4   | 0.03 |
| Martins et al., 2021        | 10.5 | 1.24 | 88.59 | 0.00 |
| Mash et al., 2020           | 2.02 | 1.37 | 2.98  | 0.36 |
| Mato et al., 2020           | 0.77 | 0.42 | 1.42  | 0.57 |
| Mayer et al., 2021          | 2.22 | 1.9  | 2.6   | 0.71 |
| Mehta et al., 2021          | 1.45 | 1.41 | 1.49  | 0.91 |
| Mehta V et al., 2020        | 1.04 | 0.57 | 1.9   | 0.44 |
| Menager et al., 2021        | 1.15 | 0.29 | 4.63  | 0.07 |
| Mendes et al., 2020         | 3.33 | 1.88 | 5.89  | 0.09 |
| Messika et al., 2021        | 1.31 | 0.19 | 9.02  | 0.02 |
| Moghaddam et al., 2020      | 0.63 | 0.1  | 4.01  | 0.09 |
| Molinero et al., 2020       | 0.99 | 0.61 | 1.64  | 0.56 |
| Morrison et al., 2020       | 1.98 | 0.73 | 5.33  | 0.07 |
| Mostaza et al., 2020        | 2.31 | 1.51 | 3.52  | 0.27 |
| Murthy et al., 2021         | 0.76 | 0.54 | 1.08  | 0.78 |
| Nachega et al., 2020        | 1.5  | 0.97 | 2.32  | 0.44 |
| Nachtigall et al., 2020     | 1.15 | 0.9  | 1.47  | 0.76 |

|                               |      |      |       |      |
|-------------------------------|------|------|-------|------|
| Nakamura et al., 2020         | 7.5  | 0.81 | 69.7  | 0.00 |
| Nepogodiev et al., 2020       | 1.79 | 1.35 | 2.39  | 0.55 |
| Neto et al., 2021             | 0.9  | 0.61 | 1.32  | 0.70 |
| Ng et al., 2020               | 1.39 | 1.23 | 1.58  | 0.85 |
| Nie et al., 2020              | 6.19 | 0.71 | 54.16 | 0.00 |
| Nikpouraghdam M et al., 2020  | 1.21 | 0.91 | 1.62  | 0.70 |
| Okoh et al., 2020             | 1.99 | 1.19 | 3.37  | 0.24 |
| Otero et al., 2021            | 0.97 | 0.37 | 2.54  | 0.24 |
| Oto et al., 2021              | 0.5  | 0.16 | 1.55  | 0.42 |
| Ozdemir et al., 2021          | 0.88 | 0.49 | 1.57  | 0.54 |
| Ozturk ey al., 2020           | 1.57 | 1.12 | 2.19  | 0.54 |
| Pascual et al., 2020          | 0.97 | 0.19 | 4.87  | 0.06 |
| Park et al., 2020a            | 2.03 | 1.29 | 3.2   | 0.29 |
| Park et al., 2020b            | 2.11 | 1.22 | 3.65  | 0.20 |
| Parlak et al., 2021           | 1.06 | 0.42 | 2.67  | 0.23 |
| Passamonti et al., 2020       | 1.39 | 0.96 | 2.01  | 0.55 |
| Peiro et al., 2021            | 1.14 | 0.54 | 2.37  | 0.30 |
| Pineiro et al., 2021          | 1.1  | 0.3  | 4.02  | 0.10 |
| Pizzini et al., 2020          | 6.65 | 2.78 | 15.9  | 0.01 |
| Plotnikow et al., 2020        | 0.55 | 0.06 | 5.35  | 0.05 |
| Pongpirul et al., 2020        | 2.02 | 0.88 | 4.63  | 0.10 |
| Qian et al., 2020             | 1.25 | 1.2  | 1.29  | 0.91 |
| Qin et al., 2020              | 2.44 | 1.5  | 3.95  | 0.20 |
| Qin W et al., 2021a           | 0.86 | 0.36 | 2.03  | 0.34 |
| Qin W et al., 2021b           | 3.15 | 1.88 | 5.27  | 0.11 |
| Quisi et al., 2020            | 0.72 | 0.36 | 1.45  | 0.53 |
| Raimondi et al., 2021         | 1.05 | 0.47 | 2.37  | 0.29 |
| Ramaswamy et al., 2020        | 1.12 | 0.47 | 2.68  | 0.23 |
| Ramos-Rincon et al., 2020     | 1.27 | 1.01 | 1.59  | 0.76 |
| Rastad et al., 2021           | 2.94 | 0.95 | 9.15  | 0.02 |
| Rajter et al., 2021           | 2.38 | 0.59 | 4.16  | 0.10 |
| Recinella et al., 2020        | 1.11 | 0.52 | 2.4   | 0.29 |
| Richardson et al.,2020        | 1.23 | 1.01 | 1.49  | 0.80 |
| Rivera-Izquierdo et al., 2020 | 1.49 | 0.82 | 2.71  | 0.29 |
| Rodilla et al., 2021          | 1.6  | 1.43 | 1.75  | 0.86 |
| Rodrigues et al.,2020         | 2.24 | 1.91 | 2.62  | 0.70 |
| Rodriguez et al., 2020        | 0.56 | 0.13 | 2.39  | 0.22 |
| Roedl et al., 2020            | 1.78 | 0.87 | 3.65  | 0.16 |
| Rokni et al., 2020            | 1.47 | 0.62 | 3.51  | 0.15 |
| Rosenthal et al., 2020        | 1.18 | 1.1  | 1.26  | 0.90 |
| Rossi et al., 2020            | 1.56 | 1.09 | 2.22  | 0.52 |
| Ruthrich et al., 2021         | 1.73 | 0.55 | 5.36  | 0.06 |
| Saeed et al., 2020            | 1.34 | 1.12 | 1.59  | 0.81 |
| Saez-Giménez et al., 2020     | 2.23 | 0.61 | 8.08  | 0.03 |
| Sai et al., 2021              | 0.34 | 0.1  | 1.22  | 0.52 |

|                           |      |      |       |      |
|---------------------------|------|------|-------|------|
| Salazer et al., 2021      | 0.97 | 0.84 | 1.11  | 0.88 |
| Saleh et al., 2021        | 1.14 | 0.68 | 2.3   | 0.35 |
| Santos et al., 2020       | 3.6  | 0.77 | 7     | 0.04 |
| Shahriarirad et al., 2020 | 0.72 | 0.18 | 2.84  | 0.17 |
| Sharma.,2020              | 1.02 | 0.92 | 1.12  | 0.89 |
| Shi et al.,2020           | 0.65 | 0.24 | 1.79  | 0.37 |
| Singh et al.,2021         | 1.91 | 1.3  | 2.83  | 0.38 |
| Smith et al.,2020         | 1.13 | 0.72 | 1.78  | 0.54 |
| Soleimani et al.,2020     | 0.86 | 0.49 | 1.5   | 0.57 |
| Stefan et al., 2020       | 0.66 | 0.12 | 3.45  | 0.12 |
| Sun et al.,2020           | 0.32 | 0.04 | 2.41  | 0.21 |
| Tang et al., 2020         | 1.57 | 1.03 | 2.4   | 0.43 |
| Tatum et al., 2020        | 1.41 | 0.57 | 3.57  | 0.14 |
| Tejpal et al., 2021       | 1.37 | 1.23 | 1.52  | 0.87 |
| Tessitore et al., 2021    | 1.6  | 0.98 | 2.6   | 0.35 |
| Trifan et al., 2020       | 4.02 | 1.14 | 14.18 | 0.01 |
| Tu Y et al., 2020         | 3.65 | 1.1  | 12.12 | 0.01 |
| Turgutalp et al., 2021    | 1.33 | 0.85 | 2.08  | 0.48 |
| Venturini et al., 2021    | 1.06 | 0.5  | 2.25  | 0.32 |
| Vrillon et al., 2021      | 1.12 | 0.38 | 3.31  | 0.15 |
| Vrotsou et al., 2021      | 1.94 | 1.68 | 2.25  | 0.76 |
| Vu et al., 2020           | 4.75 | 0.55 | 40.98 | 0.00 |
| Wang D et al., 2020       | 6.11 | 1.66 | 22.48 | 0.00 |
| Wang Junhong et al., 2020 | 2.07 | 0.84 | 5.09  | 0.08 |
| Wang L et al., 2020       | 1.73 | 1.00 | 3.00  | 0.27 |
| Wang Tao et al., 2020     | 1.67 | 0.49 | 5.62  | 0.05 |
| Wang Y et al., 2020       | 1.71 | 0.96 | 3.04  | 0.25 |
| Wargny et al., 2021       | 1.01 | 0.7  | 1.45  | 0.68 |
| Webb et al., 2020         | 0.79 | 0.24 | 2.62  | 0.21 |
| Williams et al., 2021     | 1.77 | 1.73 | 1.8   | 0.91 |
| Xu B et al., 2020         | 1.31 | 0.58 | 2.98  | 0.20 |
| Xu Jingyuan et al., 2020  | 2.37 | 1.36 | 4.12  | 0.16 |
| Xu Jiqian et al., 2020    | 1.16 | 0.68 | 1.97  | 0.46 |
| Xu Peng et al., 2020      | 2.37 | 1.08 | 5.17  | 0.08 |
| Xu Xunhua et al., 2020    | 0.91 | 0.21 | 4.01  | 0.09 |
| Yan Y et al., 2020        | 2.93 | 1.62 | 5.32  | 0.10 |
| Yang C et al., 2021       | 1.68 | 0.89 | 3.15  | 0.22 |
| Yang D et al., 2020       | 2.77 | 1.54 | 5     | 0.11 |
| Yang K et al., 2020       | 3.86 | 1.8  | 8.25  | 0.03 |
| Yang R et al., 2020       | 6.16 | 2.03 | 18.65 | 0.01 |
| Yang X et al., 2020       | 1.89 | 1.41 | 2.53  | 0.52 |
| Yang X et al., 2020       | 1.9  | 1.42 | 2.53  | 0.52 |
| Yao Q et al., 2020        | 2.33 | 0.68 | 7.9   | 0.03 |
| Yarza et al., 2020        | 1.17 | 0.37 | 3.57  | 0.13 |
| Ye et al., 2020           | 1.82 | 1.13 | 2.91  | 0.31 |

|                                            |             |             |             |        |
|--------------------------------------------|-------------|-------------|-------------|--------|
| Yu, Caizheng (2020)                        | 2.02        | 1.37        | 2.99        | 0.35   |
| Zeng H et al., 2020                        | 2.08        | 1.26        | 3.44        | 0.24   |
| Zhang Nan et al., 2020                     | 1.26        | 0.4         | 4.03        | 0.10   |
| Zhao Y et al., 2020                        | 1.64        | 1.1         | 2.46        | 0.43   |
| Zhong Y et al., 2020                       | 5.49        | 1.78        | 16.94       | 0.01   |
| Zhou S et al., 2020                        | 3.15        | 1.62        | 6.12        | 0.07   |
| Zhou Wei et al., 2021                      | 2.19        | 1.21        | 3.95        | 0.16   |
| Zhu Y et al., 2021                         | 0.94        | 0.6         | 1.47        | 0.63   |
| Zou X et al., 2020                         | 0.73        | 0.37        | 1.45        | 0.54   |
| Zuo P et al., 2020                         | 0.98        | 0.96        | 1           | 0.91   |
| <b>Total (I squared= 89.3%, p&lt;0.01)</b> | <b>1.32</b> | <b>1.26</b> | <b>1.39</b> | 100.00 |
