# Supplementary material for: Heterogeneity and Risk of Bias in Studies Examining Risk Factors for Severe Illness and Death in COVID-19: A Systematic Review and Meta-Analysis
Source: MDPI journal article supplement (doi:10.3390/pathogens11050563), 2022-05-10
Supplement: s1 [file s1]

# **Heterogeneity and risk of bias in studies examining risk factors for severe illness and death in COVID-19: a systematic review and meta-analysis**

Abraham Degarege \*, Zaeema Naveed, Josiane Kabayundo, David Brett-Major

Table S20: Heterogeneity analyses of studies that examined the relationship of comorbidities and demography factors with admission to the ICU among COVID-19 patients

| Exposure               | Overall I <sup>2</sup> (p-value) | I <sup>2</sup> from subgroup analyses   |                                        |                                                |                                         |                                                |
|------------------------|----------------------------------|-----------------------------------------|----------------------------------------|------------------------------------------------|-----------------------------------------|------------------------------------------------|
|                        |                                  | Study design (I <sup>2</sup> , p-value) | Sample size (I <sup>2</sup> , p-value) | Study area /country (I <sup>2</sup> , p-value) | Income group (I <sup>2</sup> , p-value) | Year of publication (I <sup>2</sup> , p-value) |
| Hypertension           | 63.1% (<0.01)                    | CS (75.4%, p= 0.003)                    | ≤500 (18.8%, p= 0.193)                 | China (72.3%, p<0.01)                          | High (60.6%, p<0.01)                    | 2020 (69.7%, p<0.01)                           |
|                        |                                  | P (62.8%, p<0.01)                       | 501 to 1499 (36.2%, p=0.195)           | USA (79.3%, p<0.01)                            | Middle (63.5%, p<0.01)                  | 2021 (0.0%, p= 0.790)                          |
|                        |                                  |                                         | 1500 to 3000 (88.7%, p=0.03)           | Italy (54.7%, p= 0.085)                        |                                         |                                                |
| Diabetes               | 53.7 (<0.01)                     | CS (37.4%, p= 0.157)                    | ≤500 (0.0%, p= 0.796)                  | China (56.2%, p= 0.009)                        | High (68.8%, p<0.01)                    | 2020 (41.0%, p=0.015)                          |
|                        |                                  | P (17.2%, p= 0.305)                     | 501 to 1499 (69.9%, p= 0.003)          | Italy (0.0%, p= 0.407)                         | Middle (63.5%, p<0.01)                  | 2021 (53.2%, p= 0.004)                         |
|                        |                                  | R (54.2%, p<0.01)                       | 1500 to 3000 (55.7%, p= 0.105)         | USA (11.5%, p= 0.335)                          |                                         |                                                |
|                        |                                  |                                         | 5001 to 10000 (57.6%, p=0.095)         | France (17.0%, p= 0.306)                       |                                         |                                                |
| Chronic Kidney disease | 53.1 (<0.01)                     | CS (0.0%, p= 0.641)                     | ≤500 (0.0%, p= 0.951)                  |                                                | High (68.8%, p<0.01)                    | 2020 (58.8%, p= 0.002)                         |
|                        |                                  | P (0.0%, p= 0.847)                      | 501 to 1499 (90.1%, p<0.01)            | China (0.0%, p= 0.980)                         |                                         |                                                |
|                        |                                  | R (56.0%, p=0.002)                      |                                        | USA (29.6%, p= 0.213)                          | Middle (0.0%, p=0.926)                  | 2021 (5.9%, p= 0.385)                          |
| Smoking                | 59.9% (<0.01)                    | CS (29.4%, p= 0.234)                    | ≤500 (0.0%, p= 0.676)                  | China (6.9%, p=0.342)                          | High (36.6%, p=0.126)                   | 2020 (66.5%, p= 0.004)                         |
|                        |                                  | R (66.0%, p=0.001)                      | 501 to 1499 (38.7%, p=0.163)           | USA (14.0%, p= 0.325)                          | Middle (61.7%, p=0.034)                 | 2021 (0.0%, p=0.625)                           |
| Gender                 | 70.0% (<0.01)                    | CS (0.0%, p= 0.383)                     | ≤500 (23.4%, p= 0.099)                 | China (67.2%, p<0.001)                         | High (44.0%, p=0.005)                   | 2020 (68.8%, p<0.01)                           |
|                        |                                  | P (0.0%, p=0.820)                       | 501 to 1499 (76.2%, p=0.02)            | Italy (0.0%, p= 0.883)                         | Middle (62.1%, p<0.01)                  | 2021 (42.0%, p= 0.028)                         |
|                        |                                  | R (74.6%, p<0.01)                       | 1500 to 3000 (85.1%, p<0.01)           | USA (57.5%, p= 0.009)                          |                                         |                                                |
|                        |                                  |                                         |                                        | Spain (65.2%, p= 0.035)                        |                                         |                                                |
|                        |                                  |                                         |                                        | France (0.0%, p= 0.823)                        |                                         |                                                |

CS: cross-sectional; P: prospective; R: Retrospective
