# Supplementary material for: Heterogeneity and Risk of Bias in Studies Examining Risk Factors for Severe Illness and Death in COVID-19: A Systematic Review and Meta-Analysis
Source: MDPI journal article supplement (doi:10.3390/pathogens11050563), 2022-05-10
Supplement: s1 [file s1]

# **Heterogeneity and risk of bias in studies examining risk factors for severe illness and death in COVID-19: a systematic review and meta-analysis**

Abraham Degarege \*, Zaeema Naveed, Josiane Kabayundo, David Brett-Major

**Table S8: Forest plot showing the relationship of diabetes with the odds of death among COVID-19 patients**

| <b>Author, year</b>          | <b>OR</b> | <b>LCI</b> | <b>UCI</b> | <b>% Weight</b> |
|------------------------------|-----------|------------|------------|-----------------|
| Acar et al., 2020            | 2.61      | 1.46       | 4.63       | 0.32            |
| Aiswarya et al., 2020        | 2.57      | 0.61       | 10.71      | 0.05            |
| Akbariqomi et al., 2020      | 2.23      | 1.3        | 3.81       | 0.42            |
| Akhtar et al., 2021          | 0.90      | 0.53       | 1.52       | 0.75            |
| Albalawi et al., 2021        | 0.36      | 0.12       | 1.15       | 0.74            |
| Albani et al., 2020          | 1.26      | 0.95       | 1.69       | 0.80            |
| Alberici et al., 2020        | 1.70      | 0.69       | 4.20       | 0.28            |
| Alguwaihes et al., 2021      | 1.70      | 0.7        | 4.00       | 0.30            |
| Allameh et al., 2020         | 0.91      | 0.54       | 1.55       | 0.74            |
| Almaghlouth et al., 2020     | 1.29      | 0.27       | 6.24       | 0.12            |
| Al-Salameh et al., 2020      | 0.77      | 0.44       | 1.34       | 0.77            |
| Altschul et al., 2020        | 0.95      | 0.78       | 1.16       | 0.85            |
| Anaklı et al., 2021          | 1.79      | 0.76       | 4.22       | 0.28            |
| Anantharamna et al., 2020    | 1.27      | 0.81       | 2.00       | 0.70            |
| Angelidi et al., 2021        | 0.49      | 0.11       | 2.09       | 0.52            |
| Aoun et al., 2021            | 1.34      | 0.71       | 2.54       | 0.55            |
| Atkins et al., 2020          | 3.11      | 2.06       | 4.71       | 0.39            |
| Attauabi et al., 2021        | 1.50      | 0.39       | 5.29       | 0.17            |
| Auld et al., 2020            | 1.08      | 0.59       | 1.95       | 0.66            |
| Azar et al., 2020            | 2.41      | 1.26       | 4.56       | 0.30            |
| Baggio et al., 2021          | 2.82      | 2.46       | 3.24       | 0.79            |
| Baqui et al., 2020           | 2.54      | 2.28       | 2.83       | 0.83            |
| Barbui et al., 2021          | 2.65      | 1.08       | 6.50       | 0.14            |
| Barron et al., 2020          | 9.15      | 8.91       | 9.41       | 0.84            |
| Bartoletti et al., 2020      | 1.20      | 0.72       | 2.83       | 0.49            |
| Berenguer et al., 2020       | 2.16      | 1.84       | 2.53       | 0.81            |
| Bertsimas et al., 2020       | 1.47      | 1.16       | 1.85       | 0.81            |
| Betech et al., 2020          | 1.22      | 1.17       | 1.27       | 0.87            |
| Bhatt et al., 2021           | 1.13      | 1.01       | 1.26       | 0.86            |
| Bielza et al., 2021          | 1.18      | 0.78       | 1.78       | 0.74            |
| Bode et al., 2020            | 6.10      | 3.62       | 20.28      | 0.02            |
| Bossini et al., 2020         | 1.61      | 0.36       | 6.48       | 0.12            |
| Botta et al., 2021           | 1.58      | 0.93       | 2.67       | 0.57            |
| Bottio et al., 2021          | 5.56      | 1.11       | 27.89      | 0.01            |
| Brandão et al., 2021         | 1.34      | 0.91       | 1.98       | 0.73            |
| Cabezudo-García et al., 2020 | 1.54      | 0.85       | 2.81       | 0.52            |
| Caillard et al., 2020        | 1.86      | 1.18       | 2.93       | 0.57            |
| Caliskan et al., 2020        | 1.04      | 0.44       | 2.42       | 0.52            |
| Capdevila-Reniu et al., 2021 | 1.25      | 0.61       | 2.67       | 0.50            |
| Castelnuovo et al., 2020     | 2.06      | 1.71       | 2.49       | 0.79            |
| Catteau et al., 2020         | 1.50      | 1.34       | 1.68       | 0.86            |

|                         |      |      |       |      |
|-------------------------|------|------|-------|------|
| Cen et al., 2020        | 3.10 | 1.54 | 6.21  | 0.18 |
| Chand et al., 2020      | 1.16 | 0.74 | 1.84  | 0.72 |
| Chang et al., 2020      | 2.66 | 1.12 | 6.34  | 0.15 |
| Chen et al., 2021       | 0.97 | 0.7  | 1.36  | 0.81 |
| Chen L et al., 2020     | 3.24 | 1.91 | 5.50  | 0.27 |
| Chen T et al., 2020     | 1.47 | 0.39 | 5.50  | 0.16 |
| Chen Y et al., 2020     | 2.51 | 1.53 | 4.13  | 0.40 |
| Chilimuri et al.,2020   | 1.58 | 0.94 | 2.65  | 0.58 |
| Choron et al., 2021     | 0.78 | 0.35 | 1.72  | 0.66 |
| Choudhuri et al., 2020  | 1.38 | 1    | 1.90  | 0.77 |
| Ciceri et al., 2020     | 1.71 | 0.97 | 3.03  | 0.50 |
| Cinar et al., 2021      | 4.24 | 1.95 | 9.22  | 0.09 |
| COVID-ICU group, 2020   | 1.76 | 1.53 | 2.03  | 0.84 |
| Covino et al., 2020     | 0.53 | 0.1  | 2.78  | 0.39 |
| Covino et al., 2020     | 0.67 | 0.15 | 2.96  | 0.37 |
| Covino et al., 2020     | 0.71 | 0.19 | 2.60  | 0.44 |
| Covino et al., 2021     | 0.66 | 0.21 | 2.03  | 0.56 |
| Dagher et al., 2021     | 1.73 | 0.9  | 3.32  | 0.43 |
| Deng et al., 2020       | 3.54 | 2.71 | 4.48  | 0.57 |
| De Smet et al., 2020    | 1.16 | 0.32 | 4.15  | 0.25 |
| De Souza et al., 2020   | 2.33 | 1.99 | 2.74  | 0.80 |
| De Souza et al., 2021   | 3.93 | 2.34 | 6.61  | 0.21 |
| Deeb et al., 2021       | 2.38 | 1.57 | 3.60  | 0.51 |
| Du et al., 2020         | 1.94 | 0.69 | 5.45  | 0.18 |
| Du et al., 2020         | 1.47 | 0.56 | 3.83  | 0.31 |
| Duarte et al., 2020     | 1.14 | 0.73 | 1.77  | 0.74 |
| Duclos et al., 2021     | 0.45 | 0.11 | 1.91  | 0.56 |
| Elamari et al., 2020    | 1.86 | 0.53 | 6.53  | 0.12 |
| Elhadi et al., 2021     | 1.31 | 0.9  | 1.91  | 0.74 |
| Escosteguy et al., 2021 | 1.41 | 0.87 | 2.29  | 0.65 |
| Fadini et al., 2020     | 1.35 | 0.71 | 2.59  | 0.54 |
| Falcone et al., 2020    | 1.42 | 0.76 | 2.69  | 0.53 |
| Fava et al., 2020       | 1.69 | 0.68 | 4.21  | 0.28 |
| Ferrando et al., 2020   | 1.83 | 0.42 | 7.83  | 0.08 |
| Ferrari et al., 2020    | 3.32 | 1.49 | 7.35  | 0.13 |
| Foy et al., 2020        | 6.86 | 3.59 | 13.11 | 0.05 |
| Galiero et al., 2020    | 1.48 | 0.94 | 2.34  | 0.65 |
| Genet et al., 2020      | 1.78 | 0.87 | 3.64  | 0.38 |
| Giannoglou et al., 2020 | 2.11 | 1.13 | 3.96  | 0.37 |
| Goodall et al., 2020    | 1.51 | 1.15 | 1.97  | 0.78 |
| Grasselli et al., 2020  | 2.07 | 1.71 | 2.51  | 0.79 |
| Guan et al., 2020       | 4.27 | 2.2  | 8.26  | 0.12 |
| Guo et al., 2020        | 3.20 | 0.81 | 12.58 | 0.04 |
| Gupta et al., 2020      | 1.14 | 0.91 | 1.43  | 0.83 |
| Haase et al., 2020      | 1.13 | 0.64 | 1.98  | 0.67 |

|                             |      |       |       |      |
|-----------------------------|------|-------|-------|------|
| Halvatsiotis et al., 2020   | 2.71 | 0.91  | 8.08  | 0.09 |
| Haq et al., 2020            | 3.68 | 1.82  | 7.43  | 0.14 |
| Hashemi et al., 2020        | 1.38 | 0.68  | 2.79  | 0.49 |
| Hatami et al., 2021         | 1.39 | 0.91  | 2.14  | 0.69 |
| Hendra et al., 2021         | 2.20 | 0.64  | 7.49  | 0.10 |
| Hu J et al., 2020           | 0.50 | 0.35  | 1.03  | 0.81 |
| Hwang et al., 2020          | 3.11 | 1.24  | 7.80  | 0.10 |
| Iaccarino et al., 2020      | 1.17 | 0.89  | 1.55  | 0.81 |
| Iaccarino et al., 2020      | 2.76 | 1.96  | 3.87  | 0.54 |
| Imam Z et al., 2020         | 1.24 | 0.9   | 1.70  | 0.79 |
| Incerti et al., 2021        | 1.65 | 1.5   | 1.81  | 0.86 |
| Inciardi et al., 2020       | 3.47 | 1.02  | 11.82 | 0.04 |
| Islam et al., 2020          | 2.71 | 1.18  | 6.24  | 0.16 |
| Jiang Y et al., 2020        | 3.63 | 1.21  | 10.94 | 0.05 |
| Jimeno et al., 2020         | 2.40 | 1.05  | 5.80  | 0.18 |
| Jose et al., 2021           | 2.09 | 1.18  | 3.72  | 0.41 |
| Jung et al., 2020           | 1.28 | 0.79  | 2.06  | 0.68 |
| Kaeuffer et al., 2020       | 1.70 | 1     | 2.70  | 0.58 |
| Karahan et al., 2020        | 2.40 | 1.23  | 4.68  | 0.29 |
| Kim et al., 2020            | 1.82 | 1.25  | 2.67  | 0.65 |
| Kim S et al., 2020          | 2.59 | 1.32  | 5.06  | 0.26 |
| Krause et al., 2020         | 0.75 | 0.199 | 2.86  | 0.39 |
| Krishnamoorthy et al., 2021 | 1.77 | 1.1   | 2.83  | 0.58 |
| Krishnan et al., 2020       | 1.41 | 0.73  | 2.74  | 0.51 |
| Kunal et al., 2020          | 2.38 | 0.99  | 5.69  | 0.18 |
| Kute et al., 2021           | 2.03 | 0.91  | 4.51  | 0.27 |
| Laake et al., 2020          | 2.78 | 1.53  | 5.06  | 0.28 |
| Lee et al., 2021            | 2.24 | 1.56  | 3.22  | 0.59 |
| Lee L et al., 2020          | 1.61 | 1.03  | 2.43  | 0.65 |
| Lee Y et al., 2020          | 2.29 | 1.44  | 3.64  | 0.48 |
| Li et al., 2021             | 2.30 | 1.46  | 3.63  | 0.48 |
| Li G et al., 2021           | 1.04 | 0.39  | 2.73  | 0.45 |
| Li K et al., 2020           | 0.88 | 0.18  | 4.34  | 0.22 |
| Lievre et al., 2020         | 1.40 | 1.04  | 1.89  | 0.78 |
| Ling et al., 2020           | 0.86 | 0.41  | 1.81  | 0.65 |
| Liu et al., 2020            | 3.30 | 1.24  | 8.77  | 0.08 |
| Liu et al., 2020            | 1.01 | 0.46  | 2.21  | 0.57 |
| Llamas et al., 2021         | 1.94 | 1.27  | 2.95  | 0.59 |
| Lorente et al., 2021        | 0.92 | 0.35  | 2.40  | 0.51 |
| Lorente et al., 2021        | 0.34 | 0.04  | 2.99  | 0.35 |
| Louapre et al., 2020        | 5.36 | 1.93  | 14.95 | 0.03 |
| Lu Y et al., 2021           | 0.71 | 0.18  | 2.88  | 0.39 |
| Lucar et al., 2021          | 5.94 | 1.45  | 24.25 | 0.01 |
| Lunski et al., 2021         | 0.92 | 0.7   | 1.21  | 0.84 |
| Marouf et al., 2021         | 3.46 | 1.18  | 10.13 | 0.06 |

|                               |       |      |       |      |
|-------------------------------|-------|------|-------|------|
| Martinez-Lopez et al., 2020   | 1.12  | 0.48 | 2.63  | 0.49 |
| Martins et al., 2021          | 1.69  | 0.46 | 6.13  | 0.13 |
| Mash et al., 2020             | 1.84  | 1.24 | 2.73  | 0.63 |
| Mato et al., 2020             | 2.89  | 1.42 | 5.90  | 0.20 |
| Mayer et al., 2021            | 1.69  | 1.43 | 1.99  | 0.83 |
| Mehta et al., 2021            | 1.07  | 1.04 | 1.10  | 0.87 |
| Menager et al., 2021          | 0.38  | 0.04 | 3.27  | 0.31 |
| Mendes et al., 2020           | 1.79  | 0.96 | 3.36  | 0.44 |
| Moghaddam et al., 2020        | 2.88  | 0.39 | 21.29 | 0.01 |
| Molinero et al., 2020         | 2.96  | 1.75 | 4.99  | 0.31 |
| Morrison et al., 2020         | 0.67  | 0.27 | 1.62  | 0.66 |
| Mostaza et al., 2020          | 1.20  | 0.77 | 1.88  | 0.72 |
| Murthy et al., 2021           | 1.60  | 1.1  | 2.32  | 0.69 |
| Nachega et al., 2020          | 3.53  | 2.16 | 5.77  | 0.27 |
| Nachtigall et al., 2020       | 1.44  | 1.04 | 1.98  | 0.76 |
| Nakamura et al., 2020         | 1.59  | 0.29 | 8.87  | 0.06 |
| Namendys-Silva, 2021          | 3.03  | 1.51 | 6.09  | 0.19 |
| Nepogodiev et al., 2020       | 1.15  | 0.84 | 1.57  | 0.80 |
| Ng et al., 2020               | 1.16  | 1.02 | 1.32  | 0.86 |
| Nie et al., 2020              | 3.88  | 0.65 | 22.96 | 0.01 |
| Nikpouraghdam et al., 2020    | 1.24  | 0.65 | 2.34  | 0.58 |
| Okoh et al., 2020             | 1.19  | 0.78 | 1.83  | 0.73 |
| Otero et al., 2021            | 1.12  | 0.42 | 2.93  | 0.42 |
| Oto et al., 2021              | 1.37  | 0.39 | 4.82  | 0.20 |
| Ozdemir et al., 2021          | 2.36  | 1.23 | 4.53  | 0.30 |
| Ozturk et al., 2020           | 1.94  | 1.4  | 2.70  | 0.68 |
| Pascual et al., 2020          | 0.36  | 0.07 | 1.88  | 0.56 |
| Park et al., 2020             | 2.43  | 1.51 | 3.90  | 0.44 |
| Park et al., 2020             | 2.56  | 1.47 | 4.46  | 0.34 |
| Parlak et al., 2021           | 0.43  | 0.08 | 2.25  | 0.48 |
| Passamonti et al., 2020       | 1.26  | 0.76 | 2.09  | 0.67 |
| Patel et al., 2020            | 1.29  | 0.85 | 1.97  | 0.72 |
| Peiro et al., 2021            | 2.07  | 0.95 | 4.49  | 0.28 |
| Pineiro et al., 2021          | 3.09  | 0.72 | 13.32 | 0.03 |
| Plotnikow et al., 2020        | 1.35  | 0.23 | 8.03  | 0.08 |
| Pongpirul et al., 2020        | 11.74 | 3.88 | 35.50 | 0.01 |
| Qin W et al., 2021            | 1.08  | 0.35 | 3.35  | 0.34 |
| Qin W et al., 2021            | 1.49  | 0.77 | 2.89  | 0.49 |
| Ramaswamy et al., 2020        | 2.02  | 0.69 | 5.91  | 0.15 |
| Ramos-Rincon et al., 2020     | 1.09  | 0.92 | 1.30  | 0.85 |
| Rastad et al., 2021           | 1.89  | 0.73 | 4.90  | 0.22 |
| Rajter et al., 2021           | 1.17  | 0.39 | 3.55  | 0.32 |
| Recinella et al., 2020        | 0.57  | 0.22 | 1.50  | 0.68 |
| Rivera-Izquierdo et al., 2020 | 4.83  | 2.5  | 9.30  | 0.10 |
| Rodriguez et al., 2020        | 1.50  | 0.23 | 9.80  | 0.05 |

|                           |       |      |        |      |
|---------------------------|-------|------|--------|------|
| Rokni et al., 2020        | 1.47  | 0.55 | 3.92   | 0.29 |
| Rosenthal et al., 2020    | 1.20  | 1.12 | 1.28   | 0.87 |
| Rossi et al., 2020        | 1.34  | 0.91 | 1.96   | 0.73 |
| Rottoli et al., 2020      | 1.00  | 0.48 | 2.05   | 0.61 |
| Russo et al., 2020        | 1.34  | 0.82 | 2.19   | 0.66 |
| Saha et al., 2021         | 1.37  | 0.74 | 2.53   | 0.56 |
| Sai et al., 2021          | 1.11  | 0.32 | 3.90   | 0.27 |
| Saifi et al., 2021        | 1.85  | 0.27 | 12.76  | 0.03 |
| Salazer et al., 2021      | 1.32  | 1.12 | 1.56   | 0.85 |
| Sands et al., 2020        | 1.57  | 1.21 | 2.03   | 0.78 |
| Santos et al., 2020       | 33.00 | 3.46 | 314.55 | 0.00 |
| Shahriarirad et al., 2020 | 1.84  | 0.35 | 9.75   | 0.05 |
| Sharma, 2020              | 1.19  | 1.08 | 1.66   | 0.83 |
| Shi et al., 2020          | 2.18  | 1.13 | 4.17   | 0.34 |
| Shields et al., 2020      | 7.50  | 1.67 | 32.66  | 0.01 |
| Smith et al., 2020        | 1.96  | 1.25 | 3.08   | 0.55 |
| Stefan et al., 2020       | 0.69  | 0.11 | 4.18   | 0.23 |
| Sun et al., 2020          | 1.18  | 0.64 | 2.20   | 0.61 |
| Talavera et al., 2020     | 1.33  | 0.76 | 2.34   | 0.61 |
| Tehrani et al., 2021      | 1.35  | 0.68 | 2.66   | 0.52 |
| Tehrani et al., 2021      | 3.30  | 1.54 | 7.10   | 0.14 |
| Tessitore et al., 2021    | 1.60  | 0.91 | 2.60   | 0.58 |
| Tu et al., 2020           | 8.72  | 2.27 | 33.45  | 0.01 |
| Turgutalp et al., 2021    | 1.01  | 0.65 | 1.58   | 0.76 |
| Venturini et al., 2021    | 1.33  | 0.48 | 3.71   | 0.31 |
| Vrillon et al., 2021      | 1.49  | 0.52 | 4.29   | 0.25 |
| Vu et al., 2020           | 1.63  | 0.35 | 7.50   | 0.09 |
| Wang et al., 2020         | 4.88  | 1.31 | 18.18  | 0.02 |
| Wang et al., 2020         | 1.09  | 0.52 | 2.26   | 0.57 |
| Wang Junhong et al., 2020 | 2.58  | 1.04 | 6.41   | 0.15 |
| Webb et al., 2020         | 1.83  | 0.57 | 5.87   | 0.15 |
| Xu Jingyuan et al., 2020  | 1.05  | 0.55 | 1.98   | 0.65 |
| Xu Jiqian et al., 2020    | 0.80  | 0.41 | 1.58   | 0.71 |
| Xu Peng et al., 2020      | 7.11  | 3.3  | 15.31  | 0.03 |
| Y.Wang et al., 2020       | 3.28  | 1.2  | 8.98   | 0.08 |
| Yan et al., 2020          | 2.83  | 1.42 | 5.62   | 0.22 |
| Yang C. et al., 2021      | 1.65  | 0.73 | 3.75   | 0.34 |
| Yang K. et al., 2020      | 0.41  | 0.09 | 1.81   | 0.58 |
| Yao et al., 2021          | 2.98  | 1.03 | 8.64   | 0.08 |
| Yarza et al., 2020        | 1.18  | 0.34 | 3.90   | 0.27 |
| Yildirim et al., 2021     | 0.34  | 0.04 | 2.84   | 0.37 |
| Yu C, 2020                | 2.52  | 1.62 | 3.94   | 0.45 |
| Zhao Y et al., 2020       | 2.79  | 1.59 | 4.90   | 0.30 |
| Zhou S et al., 2020       | 3.18  | 1.48 | 6.84   | 0.15 |
| Zhou Wei et al., 2021     | 1.21  | 0.6  | 2.42   | 0.56 |

|                                           |             |             |             |               |
|-------------------------------------------|-------------|-------------|-------------|---------------|
| Zhu Y et al., 2021                        | 0.93        | 0.58        | 1.49        | 0.76          |
| Zou X et al., 2020                        | 1.44        | 0.69        | 3.04        | 0.45          |
| Zuo P et al., 2020                        | 0.98        | 0.96        | 1.00        | 0.87          |
| <b>Total (I squared=95.5%, p&lt;0.01)</b> | <b>1.56</b> | <b>1.45</b> | <b>1.67</b> | <b>100.00</b> |
