# Supplementary material for: Heterogeneity and Risk of Bias in Studies Examining Risk Factors for Severe Illness and Death in COVID-19: A Systematic Review and Meta-Analysis
Source: MDPI journal article supplement (doi:10.3390/pathogens11050563), 2022-05-10
Supplement: s1 [file s1]

# Heterogeneity and risk of bias in studies examining risk factors for severe illness and death in COVID-19: a systematic review and meta-analysis

Abraham Degarege \*, Zaeema Naveed, Josiane Kabayundo, David Brett-Major

Table S22: Risk of bias and quality of the studies included in this review

| References                | Selection bias | Design | Confounders | Blinding (detection and reporting bias) | Data collection | Withdrawals and dropouts | Overall quality |
|---------------------------|----------------|--------|-------------|-----------------------------------------|-----------------|--------------------------|-----------------|
| Abadia-Otero et al., 2021 | 2              | 2      | 1           | 2                                       | 1               | 3                        | 2               |
| Abbas et al., 2021        | 2              | 2      | 3           | 3                                       | 1               | 3                        | 3               |
| Acar et al., 2021         | 2              | 2      | 2           | 2                                       | 1               | 2                        | 1               |
| Adamuz et al., 2021       | 2              | 2      | 1           | 2                                       | 1               | 2                        | 1               |
| Agarwal et al., 2020      | 2              | 2      | 1           | 2                                       | 1               | 3                        | 2               |
| Aggarwal et al. 2020      | 2              | 2      | 1           | 2                                       | 1               | 3                        | 2               |
| Ahmad et al., 2021        | 2              | 2      | 3           | 3                                       | 1               | 3                        | 3               |
| Aiswarya et al., 2021     | 2              | 2      | 3           | 3                                       | 1               | 3                        | 3               |
| Akbariqomi et al., 2020   | 2              | 2      | 1           | 3                                       | 1               | 3                        | 3               |
| Akhtar et al., 2021       | 2              | 2      | 3           | 2                                       | 1               | 2                        | 2               |
| Alahmari et al., 2020     | 2              | 3      | 1           | 1                                       | 1               | 3                        | 2               |
| Alasia et al., 2020       | 2              | 2      | 1           | 3                                       | 1               | 3                        | 3               |

|                            |   |   |   |   |   |     |   |
|----------------------------|---|---|---|---|---|-----|---|
| Albani et al., 2020        | 2 | 2 | 1 | 3 | 1 | 1   | 2 |
| Alberici et al., 2020      | 2 | 2 | 3 | 3 | 1 | 3   | 3 |
| Alfraij et al., 2020       | 2 | 2 | 3 | 2 | 1 | 3   | 3 |
| Algado-Selles et al., 2020 | 2 | 2 | 1 | 3 | 1 | 3   | 3 |
| Algahtani et al., 2020     | 2 | 3 | 3 | 2 | 1 | N/A | 3 |
| Alguwaihes et al., 2021    | 2 | 2 | 1 | 2 | 1 | 3   | 2 |
| Aliberti et al., 2021      | 2 | 2 | 1 | 2 | 1 | 2   | 1 |
| Aljishi et al., 2020       | 2 | 2 | 1 | 2 | 1 | 3   | 2 |
| Allemah et al., 2020       | 2 | 2 | 1 | 2 | 1 | 3   | 2 |
| Allard et al., 2020        | 1 | 2 | 3 | 2 | 2 | 1   | 2 |
| Allenbach et al., 2020     | 2 | 2 | 3 | 3 | 1 | 3   | 3 |
| Almaghlouth et al., 2021   | 2 | 2 | 2 | 3 | 2 | 3   | 3 |
| Aloisio et al., 2020       | 2 | 2 | 3 | 2 | 1 | 1   | 2 |
| Al-Salameh et al., 2021    | 2 | 2 | 1 | 2 | 1 | 3   | 2 |
| Al-Samkari et al., 2020    | 2 | 2 | 1 | 2 | 1 | 1   | 1 |
| Alser et al., 2021         | 2 | 2 | 1 | 3 | 1 | 3   | 3 |
| Alsharidah et al., 2020    | 2 | 1 | 1 | 3 | 1 | 3   | 3 |
| Altschul et al., 2020      | 2 | 2 | 2 | 2 | 1 | 3   | 2 |
| Alzaid et al., 2020        | 2 | 2 | 1 | 3 | 3 | 3   | 3 |
| Amanat et al., 2021        | 2 | 2 | 1 | 3 | 2 | 1   | 2 |
| Amo et al., 2020           | 2 | 2 | 2 | 2 | 1 | 3   | 2 |
| Anakli et al., 2021        | 2 | 2 | 3 | 2 | 1 | 3   | 3 |
| Anantharaman et al., 2020  | 2 | 2 | 1 | 2 | 1 | 3   | 2 |

|                             |   |   |   |   |   |   |   |
|-----------------------------|---|---|---|---|---|---|---|
| Andargie et al., 2021       | 2 | 2 | 1 | 3 | 1 | 3 | 3 |
| Angelidi et al., 2021       | 2 | 2 | 1 | 2 | 1 | 3 | 2 |
| Angelis et al., 2020        | 2 | 2 | 1 | 3 | 1 | 3 | 3 |
| Annweiler et al., 2020      | 1 | 2 | 1 | 2 | 1 | 3 | 2 |
| Antunez-Montes et al., 2021 | 2 | 2 | 1 | 2 | 1 | 3 | 2 |
| Aoun et al., 2021           | 2 | 2 | 2 | 2 | 1 | 3 | 2 |
| Apea et al., 2021           | 2 | 2 | 1 | 2 | 1 | 2 | 1 |
| Attauabi et al., 2021       | 2 | 2 | 1 | 2 | 1 | 3 | 2 |
| Auld et al., 2020           | 2 | 2 | 3 | 2 | 1 | 3 | 3 |
| Avci et al., 2020           | 2 | 2 | 2 | 2 | 1 | 2 | 1 |
| Avruscio et al., 2020       | 2 | 2 | 1 | 2 | 1 | 3 | 2 |
| Aw et al., 2020             | 2 | 2 | 1 | 2 | 1 | 3 | 2 |
| Awad et al., 2021           | 2 | 2 | 2 | 2 | 1 | 3 | 2 |
| Azar et al., 2020           | 2 | 2 | 1 | 2 | 1 | 1 | 1 |
| Azwar et al., 2020          | 2 | 2 | 3 | 2 | 1 | 3 | 3 |
| Baggio et al., 2021         | 2 | 3 | 2 | 2 | 1 | 2 | 2 |
| Bailey et al., 2021         | 2 | 2 | 1 | 2 | 1 | 3 | 2 |
| Bain et al., 2020           | 2 | 2 | 3 | 2 | 2 | 3 | 3 |
| Bannaga et al., 2020        | 2 | 2 | 2 | 2 | 1 | 3 | 2 |
| Baqui et al., 2020          | 2 | 3 | 3 | 2 | 1 | 3 | 3 |
| Barron et al., 2020         | 2 | 2 | 1 | 2 | 1 | 3 | 2 |
| Bartoletti et al., 2020     | 2 | 2 | 1 | 2 | 3 | 3 | 3 |
| Basaran et al., 2021        | 2 | 2 | 2 | 2 | 1 | 3 | 2 |
| Bauer et al. 2021           | 2 | 2 | 1 | 2 | 1 | 3 | 2 |

|                            |   |   |   |   |   |   |   |
|----------------------------|---|---|---|---|---|---|---|
| Bezzio et al. 2020         | 1 | 2 | 3 | 2 | 2 | 3 | 3 |
| Becerra-Munoz et al., 2021 | 2 | 2 | 2 | 2 | 1 | 1 | 1 |
| Bedock et al., 2020        | 2 | 2 | 2 | 2 | 1 | 2 | 1 |
| Belli et al., 2021         | 2 | 2 | 2 | 2 | 1 | 2 | 1 |
| Bellino et al. 2020        | 2 | 2 | 2 | 2 | 1 | 3 | 2 |
| Berenguer et al., 2020     | 2 | 2 | 2 | 2 | 1 | 2 | 1 |
| Bernard et al., 2021       | 2 | 2 | 1 | 2 | 1 | 3 | 2 |
| Bertsimas et al., 2020     | 2 | 2 | 2 | 2 | 1 | 3 | 2 |
| Betti et al., 2020         | 2 | 2 | 3 | 2 | 1 | 3 | 3 |
| Bhargava et al., 2020      | 2 | 2 | 1 | 2 | 1 | 3 | 2 |
| Bhatt et al., 2020         | 2 | 2 | 1 | 2 | 1 | 3 | 2 |
| Bianchetti et al., 2020    | 2 | 2 | 3 | 3 | 3 | 3 | 3 |
| Bielza et al., 2020        | 2 | 2 | 1 | 2 | 1 | 2 | 1 |
| Birati et al., 2021        | 2 | 3 | 3 | 2 | 1 | 3 | 3 |
| Bode et al., 2020          | 2 | 2 | 3 | 2 | 1 | 3 | 3 |
| Boero et al., 2021         | 2 | 2 | 2 | 2 | 1 | 3 | 2 |
| Bolouri et al., 2020       | 2 | 2 | 2 | 3 | 1 | 3 | 3 |
| Bossini et al., 2020       | 2 | 2 | 2 | 3 | 1 | 3 | 3 |
| Botta et al., 2021         | 2 | 2 | 1 | 2 | 1 | 1 | 1 |
| Bottio et al., 2020        | 2 | 2 | 3 | 3 | 3 | 3 | 3 |
| Brandao-Neto et al., 2021  | 2 | 2 | 2 | 3 | 1 | 1 | 2 |
| Bravi et al., 2020         | 2 | 2 | 2 | 2 | 1 | 3 | 2 |
| Brenner et al., 2020       | 2 | 2 | 1 | 2 | 2 | 3 | 2 |
| Brouns et al., 2020        | 2 | 3 | 2 | 3 | 1 | 3 | 3 |

|                              |   |   |   |   |   |   |   |
|------------------------------|---|---|---|---|---|---|---|
| Bruggemann et al., 2020      | 2 | 2 | 2 | 3 | 1 | 3 | 3 |
| Byeon et al., 2021           | 1 | 3 | 2 | 3 | 1 | 1 | 3 |
| Cabello et al., 2020         | 2 | 2 | 2 | 2 | 1 | 3 | 2 |
| Cabezudo-Garcia et al., 2020 | 2 | 3 | 2 | 3 | 1 | 3 | 3 |
| Cai et al., 2021             | 2 | 2 | 1 | 2 | 1 | 1 | 1 |
| Cai et al., 2021             | 2 | 2 | 1 | 3 | 1 | 3 | 3 |
| Cai et al., 2020             | 2 | 2 | 2 | 3 | 1 | 3 | 3 |
| Cai et al., 2020             | 2 | 2 | 2 | 2 | 1 | 3 | 2 |
| Caillard et al., 2020        | 2 | 2 | 1 | 3 | 1 | 3 | 3 |
| Calik-Basaran et al., 2021   | 2 | 2 | 3 | 3 | 1 | 3 | 3 |
| Caliskan & Saylan, 2020      | 2 | 2 | 2 | 2 | 2 | 3 | 2 |
| Cao et al., 2020             | 2 | 2 | 3 | 3 | 1 | 1 | 3 |
| Capdedila-Reniu et al., 2021 | 2 | 2 | 2 | 2 | 1 | 3 | 2 |
| Cariou et al., 2020          | 2 | 2 | 2 | 3 | 1 | 1 | 2 |
| Carter et al., 2020          | 2 | 2 | 1 | 3 | 1 | 1 | 2 |
| Carubbi et al., 2021         | 2 | 2 | 3 | 3 | 1 | 2 | 3 |
| Catteau et al., 2020         | 2 | 2 | 1 | 2 | 2 | 3 | 2 |
| Cattelan et al., 2020        | 2 | 2 | 3 | 3 | 1 | 3 | 3 |
| Cekerevac et al., 2021       | 2 | 3 | 3 | 3 | 1 | 3 | 3 |
| Cen et al., 2020             | 2 | 2 | 1 | 3 | 1 | 3 | 3 |
| Chand et al., 2020           | 2 | 2 | 1 | 2 | 1 | 3 | 2 |
| Chang et al., 2020           | 2 | 2 | 3 | 2 | 1 | 3 | 3 |
| Chaudhry et al., 2020        | 2 | 2 | 3 | 3 | 3 | 3 | 3 |
| Chen et al., 2020            | 2 | 2 | 1 | 2 | 1 | 3 | 2 |

|                                                           |   |   |   |   |   |   |   |
|-----------------------------------------------------------|---|---|---|---|---|---|---|
| Chen et al., 2020                                         | 2 | 2 | 2 | 2 | 1 | 3 | 2 |
| Chen et al., 2020                                         | 2 | 2 | 2 | 3 | 1 | 3 | 3 |
| Chen et al., 2020                                         | 2 | 2 | 2 | 2 | 1 | 3 | 2 |
| Chen et al., 2020                                         | 2 | 2 | 2 | 2 | 1 | 3 | 2 |
| Chen et al., 2020                                         | 2 | 2 | 2 | 2 | 1 | 3 | 2 |
| Chen et al., 2021                                         | 2 | 2 | 2 | 2 | 1 | 3 | 2 |
| Chen et al., 2020                                         | 2 | 2 | 2 | 3 | 1 | 3 | 3 |
| Cheng et al., 2020                                        | 2 | 2 | 1 | 2 | 1 | 3 | 2 |
| Chilimuri et al., 2020                                    | 2 | 2 | 1 | 1 | 1 | 3 | 2 |
| Choron et al., 2021                                       | 2 | 2 | 1 | 2 | 1 | 1 | 1 |
| Choudhuri et al., 2020                                    | 2 | 2 | 2 | 2 | 1 | 3 | 2 |
| Ciceri et al., 2020                                       | 2 | 2 | 2 | 3 | 2 | 2 | 2 |
| Cinar et al., 2021                                        | 2 | 3 | 2 | 2 | 1 | 3 | 3 |
| Cizmecioglu et al., 2021                                  | 2 | 2 | 3 | 3 | 1 | 3 | 3 |
| Collaborative Geriatric Medicine<br>Research et al., 2021 | 2 | 2 | 1 | 3 | 1 | 3 | 3 |
| COVID-ICU Group, 2021                                     | 2 | 2 | 2 | 2 | 1 | 1 | 1 |
| COVIDSurg Collaborative,<br>Lancet, 2020                  | 2 | 2 | 2 | 2 | 1 | 1 | 1 |
| Covino et al., 2021                                       | 2 | 2 | 3 | 2 | 1 | 3 | 3 |
| Covino et al., 2020                                       | 2 | 2 | 2 | 2 | 1 | 3 | 2 |
| Covino et al., 2020                                       | 2 | 2 | 2 | 2 | 2 | 3 | 2 |
| Covino et al., 2020                                       | 2 | 2 | 1 | 2 | 1 | 2 | 1 |
| Cummings et al., 2020                                     | 2 | 2 | 1 | 2 | 1 | 3 | 2 |

|                             |   |   |   |   |   |   |   |
|-----------------------------|---|---|---|---|---|---|---|
|                             |   |   |   |   |   |   |   |
| Dagher et al., 2021         | 2 | 2 | 2 | 2 | 1 | 3 | 2 |
| Dai et al., 2020            | 2 | 2 | 3 | 2 | 3 | 3 | 3 |
| DeSemet et al., 2020        | 2 | 2 | 2 | 2 | 1 | 3 | 2 |
| DeSouza et al., 2020        | 2 | 3 | 2 | 2 | 2 | 3 | 3 |
| DeSouza et al., 2021        | 2 | 2 | 2 | 2 | 1 | 3 | 2 |
| Deeb et al., 2021           | 2 | 2 | 2 | 3 | 2 | 3 | 3 |
| Del Amo et al., 2020        | 2 | 2 | 3 | 3 | 1 | 3 | 3 |
| Di Castelnuovo et al., 2020 | 2 | 2 | 1 | 2 | 1 | 1 | 1 |
| Di Cosimo et al., 2021      | 2 | 2 | 2 | 3 | 3 | 3 | 3 |
| Du et al., 2020             | 2 | 2 | 2 | 3 | 1 | 3 | 3 |
| Du et al., 2020             | 2 | 2 | 3 | 2 | 1 | 3 | 3 |
| Duan et al., 2020           | 2 | 2 | 2 | 2 | 1 | 1 | 1 |
| Duarte et al., 2020         | 2 | 2 | 2 | 3 | 3 | 3 | 3 |
| Duclos et al., 2021         | 2 | 2 | 2 | 2 | 1 | 3 | 2 |
| Ebinger et al., 2021        | 1 | 3 | 1 | 2 | 1 | 3 | 3 |
| Elhadi et al., 2021         | 2 | 2 | 3 | 2 | 1 | 1 | 2 |
| Escobar et al., 2020        | 2 | 3 | 3 | 3 | 3 | 3 | 3 |
| Escosteguy et al., 2020     | 2 | 3 | 2 | 3 | 1 | 3 | 3 |
| Etienne et al., 2020        | 2 | 2 | 2 | 3 | 2 | 3 | 3 |
| Fadini et al., 2020         | 2 | 2 | 1 | 2 | 1 | 3 | 2 |
| Falconi et al., 2020        | 2 | 2 | 1 | 3 | 1 | 3 | 3 |
| Fava et al., 2020           | 2 | 2 | 2 | 3 | 1 | 1 | 2 |
| Ferguson et al., 2020       | 2 | 2 | 3 | 3 | 1 | 3 | 3 |

|                               |   |   |   |   |   |   |   |
|-------------------------------|---|---|---|---|---|---|---|
| Fernandes et al., 2021        | 2 | 2 | 1 | 2 | 1 | 1 | 1 |
| Ferrando et al., 2020         | 2 | 2 | 2 | 2 | 1 | 3 | 2 |
| Ferrando-Vivas et al., 2021   | 2 | 2 | 1 | 2 | 1 | 1 | 1 |
| Ferrari et al., 2021          | 2 | 2 | 2 | 2 | 1 | 3 | 2 |
| Fox et al., 2021              | 2 | 3 | 1 | 3 | 1 | 1 | 3 |
| Foy et al., 2020              | 2 | 2 | 2 | 3 | 1 | 3 | 3 |
| Freites et al., 2020          | 2 | 2 | 2 | 3 | 1 | 3 | 3 |
| Frontera et al., 2020         | 2 | 2 | 1 | 2 | 1 | 1 | 1 |
| Fu et al., 2020               | 2 | 2 | 3 | 3 | 1 | 3 | 3 |
| Galiero et al., 2020          | 2 | 2 | 2 | 3 | 1 | 1 | 2 |
| Gao et al., 2020              | 2 | 2 | 2 | 2 | 1 | 3 | 2 |
| Gao et al., 2020              | 2 | 3 | 2 | 3 | 1 | 3 | 3 |
| Genet et al., 2020            | 2 | 2 | 1 | 2 | 1 | 2 | 1 |
| Ghaffari et al., 2021         | 2 | 2 | 2 | 3 | 1 | 3 | 3 |
| Giannoglou et al., 2020       | 2 | 3 | 2 | 3 | 3 | 3 | 3 |
| Goicoechea et al., 2020       | 2 | 2 | 3 | 3 | 3 | 3 | 3 |
| Gomez et al., 2021            | 2 | 2 | 2 | 2 | 1 | 1 | 1 |
| Gonzalez-Gancedo et al., 2021 | 2 | 3 | 3 | 2 | 2 | 1 | 3 |
| Goodall et al., 2020          | 2 | 2 | 2 | 3 | 1 | 3 | 3 |
| Grasselli et al., 2020        | 2 | 2 | 1 | 3 | 1 | 1 | 2 |
| Gu et al., 2020               | 2 | 2 | 1 | 2 | 1 | 3 | 2 |
| Guarneri et al., 2021         | 2 | 3 | 3 | 3 | 1 | 3 | 3 |
| Guo et al., 2020              | 2 | 3 | 3 | 3 | 1 | 3 | 3 |
| Gupta et al., 2020            | 2 | 2 | 1 | 2 | 1 | 1 | 1 |



|                           |   |   |   |   |   |   |   |
|---------------------------|---|---|---|---|---|---|---|
| Haase et al., 2021        | 2 | 2 | 2 | 2 | 1 | 3 | 2 |
| Halvatsiotis et al., 2020 | 2 | 2 | 3 | 2 | 2 | 3 | 3 |
| He et al., 2020           | 2 | 2 | 1 | 3 | 1 | 3 | 3 |
| Hendra et al., 2021       | 2 | 2 | 2 | 3 | 1 | 1 | 2 |
| Hashemi et al., 2020      | 2 | 2 | 1 | 3 | 1 | 3 | 3 |
| Hoffmann et al., 2021     | 2 | 3 | 1 | 2 | 1 | 3 | 3 |
| Hu et al., 2021           | 2 | 2 | 2 | 3 | 1 | 1 | 2 |
| Hu et al., 2020           | 2 | 3 | 2 | 2 | 1 | 2 | 2 |
| Hu et al., 2021           | 2 | 2 | 2 | 2 | 1 | 3 | 2 |
| Huang et al., 2020        | 2 | 2 | 1 | 2 | 1 | 3 | 2 |
| Huang et al., 2020        | 2 | 2 | 2 | 3 | 1 | 3 | 3 |
| Huang et al., 2020        | 2 | 2 | 3 | 2 | 1 | 3 | 3 |
| Hussein et al., 2020      | 2 | 2 | 2 | 3 | 1 | 3 | 3 |
| Hwang et al., 2020        | 2 | 2 | 2 | 2 | 1 | 3 | 2 |
| Iaccarino et al., 2020    | 2 | 3 | 2 | 2 | 1 | 1 | 2 |
| Imam et al., 2020         | 2 | 2 | 2 | 3 | 1 | 3 | 3 |
| Incerti et al., 2021      | 2 | 2 | 1 | 2 | 1 | 2 | 1 |
| Inciarbi et al., 2020     | 2 | 2 | 2 | 3 | 1 | 3 | 3 |
| Islam et al., 2020        | 2 | 2 | 2 | 3 | 1 | 1 | 2 |
| Jain et al., 2021         | 2 | 2 | 2 | 3 | 1 | 3 | 3 |
| Jang et al., 2020         | 2 | 2 | 2 | 2 | 1 | 1 | 1 |
| Jegade et al., 2021       | 2 | 2 | 3 | 3 | 2 | 3 | 3 |
| Jiang et al., 2021        | 2 | 2 | 2 | 2 | 1 | 1 | 1 |
| Jiang et al., 2020        | 2 | 2 | 3 | 2 | 1 | 1 | 2 |

|                             |   |   |   |   |   |   |   |
|-----------------------------|---|---|---|---|---|---|---|
| Ji et al., 2021             | 2 | 2 | 3 | 3 | 1 | 3 | 3 |
| Jimeno et al., 2021         | 2 | 2 | 2 | 3 | 1 | 3 | 3 |
| Jorgensen et al., 2020      | 2 | 2 | 3 | 3 | 1 | 3 | 3 |
| Jung et al., 2021           | 2 | 2 | 2 | 3 | 1 | 3 | 3 |
| Kabarriti et al., 2020      | 2 | 2 | 2 | 2 | 1 | 3 | 2 |
| Kaeuffer et al., 2020       | 2 | 2 | 1 | 2 | 1 | 3 | 2 |
| Kalligeros et al., 2020     | 2 | 2 | 1 | 2 | 1 | 3 | 2 |
| Karahan et al., 2021        | 2 | 3 | 2 | 3 | 1 | 3 | 3 |
| Karimi et al., 2020         | 2 | 2 | 3 | 3 | 1 | 3 | 3 |
| Kaya et al., 2021           | 2 | 2 | 2 | 2 | 1 | 3 | 2 |
| Khan et al., 2020           | 2 | 2 | 1 | 2 | 1 | 3 | 2 |
| Kim et al., 2020            | 2 | 2 | 1 | 2 | 1 | 3 | 2 |
| Kim et al., 2021            | 2 | 2 | 2 | 2 | 1 | 3 | 2 |
| Kim et al., 2021            | 2 | 2 | 2 | 2 | 1 | 1 | 1 |
| Krause et al., 2021         | 2 | 2 | 1 | 2 | 1 | 3 | 2 |
| Krishnamoorthy et al., 2021 | 2 | 2 | 2 | 2 | 1 | 3 | 2 |
| Krishnan et al., 2020       | 2 | 2 | 3 | 2 | 2 | 3 | 3 |
| Kunal et al., 2020          | 2 | 2 | 1 | 2 | 1 | 1 | 1 |
| Kute et al., 2021           | 2 | 2 | 2 | 3 | 1 | 3 | 3 |
| Laccarino et al., 2020      | 2 | 3 | 2 | 3 | 3 | 1 | 3 |
| Laake et al., 2021          | 2 | 3 | 3 | 2 | 1 | 3 | 3 |
| Lara et al., 2020           | 2 | 2 | 1 | 2 | 1 | 3 | 2 |
| Lauranne et al., 2020       | 2 | 2 | 3 | 3 | 1 | 3 | 3 |
| Lee et al., 2021            | 2 | 2 | 1 | 2 | 1 | 3 | 2 |

|                      |   |   |   |   |   |   |   |
|----------------------|---|---|---|---|---|---|---|
| Lee et al., 2020     | 2 | 2 | 1 | 2 | 1 | 3 | 2 |
| Lee et al., 2020     | 2 | 2 | 1 | 3 | 1 | 3 | 3 |
| Lee et al., 2020     | 2 | 2 | 2 | 2 | 1 | 1 | 1 |
| Lei et al., 2020     | 2 | 2 | 2 | 3 | 1 | 3 | 3 |
| Lei et al., 2020     | 2 | 2 | 1 | 2 | 1 | 1 | 1 |
| Li et al., 2020      | 2 | 3 | 2 | 2 | 1 | 1 | 2 |
| Li et al., 2021      | 2 | 2 | 2 | 2 | 1 | 1 | 1 |
| Li et al., 2021      | 2 | 2 | 3 | 3 | 1 | 3 | 3 |
| Li et al., 2020      | 2 | 2 | 2 | 2 | 1 | 1 | 1 |
| Lian et al., 2020    | 2 | 2 | 2 | 2 | 1 | 3 | 2 |
| Lievre et al., 2020  | 2 | 2 | 2 | 3 | 1 | 1 | 2 |
| Ling et al., 2020    | 2 | 2 | 1 | 2 | 1 | 3 | 2 |
| Liu et al., 2020     | 2 | 2 | 2 | 3 | 2 | 3 | 3 |
| Liu et al., 2021     | 2 | 2 | 2 | 3 | 1 | 3 | 3 |
| Liu et al., 2020     | 2 | 2 | 2 | 2 | 2 | 1 | 1 |
| Lohia et al., 2021   | 2 | 2 | 1 | 2 | 1 | 1 | 1 |
| Long et al., 2020    | 2 | 2 | 3 | 3 | 1 | 3 | 3 |
| Lorente et al., 2021 | 2 | 2 | 2 | 2 | 1 | 3 | 2 |
| Lorente et al., 2021 | 2 | 2 | 2 | 2 | 1 | 3 | 2 |
| Louapre et al., 2020 | 2 | 2 | 2 | 3 | 2 | 1 | 2 |
| Lu et al., 2021      | 2 | 2 | 2 | 2 | 1 | 3 | 2 |
| Lucar et al., 2021   | 2 | 2 | 2 | 3 | 1 | 3 | 3 |
| Lunski et al., 2021  | 2 | 2 | 2 | 3 | 1 | 3 | 3 |
| Luo et al., 2020     | 2 | 2 | 2 | 2 | 1 | 1 | 1 |

|                             |   |   |   |   |   |   |   |
|-----------------------------|---|---|---|---|---|---|---|
| Maguire et al., 2020        | 2 | 2 | 2 | 3 | 1 | 3 | 3 |
| Mak et al., 2021            | 2 | 2 | 2 | 3 | 1 | 3 | 3 |
| Marengoni et al., 2020      | 2 | 2 | 2 | 3 | 1 | 3 | 3 |
| Marouf et al., 2021         | 2 | 2 | 2 | 3 | 1 | 3 | 3 |
| Martins et al., 2021        | 2 | 2 | 3 | 3 | 1 | 3 | 3 |
| Martinez-Lopez et al., 2020 | 2 | 2 | 2 | 3 | 1 | 2 | 2 |
| Mash et al., 2021           | 2 | 3 | 2 | 2 | 1 | 3 | 3 |
| Mather et al., 2020         | 2 | 2 | 2 | 2 | 1 | 3 | 2 |
| Mato et al., 2020           | 2 | 2 | 2 | 3 | 1 | 3 | 3 |
| Mayer et al., 2021          | 2 | 2 | 2 | 3 | 1 | 3 | 3 |
| Mehta et al., 2021          | 2 | 2 | 2 | 2 | 2 | 3 | 2 |
| Mehta et al., 2020          | 2 | 2 | 1 | 2 | 1 | 3 | 2 |
| Menager et al., 2020        | 2 | 2 | 2 | 3 | 1 | 1 | 2 |
| Mendes et al., 2020         | 2 | 2 | 2 | 2 | 1 | 3 | 2 |
| Messika et al., 2021        | 2 | 2 | 2 | 3 | 1 | 3 | 3 |
| Moghaddam et al., 2020      | 2 | 2 | 3 | 3 | 1 | 3 | 3 |
| Morrison et al., 2020       | 2 | 2 | 2 | 3 | 2 | 3 | 3 |
| Murthy et al., 2021         | 2 | 2 | 2 | 2 | 1 | 3 | 2 |
| Nachega et al., 2020        | 2 | 2 | 1 | 2 | 1 | 1 | 1 |
| Nachtigall et al., 2020     | 2 | 2 | 2 | 2 | 1 | 1 | 1 |
| Nakamura et al., 2021       | 2 | 2 | 3 | 2 | 1 | 3 | 3 |
| Namendys-Silva et al., 2021 | 2 | 2 | 2 | 3 | 1 | 1 | 2 |
| Ng et al., 2020             | 2 | 2 | 1 | 3 | 3 | 1 | 3 |
| Nie et al., 2021            | 2 | 2 | 1 | 2 | 1 | 1 | 1 |

|                             |   |   |   |   |   |   |   |
|-----------------------------|---|---|---|---|---|---|---|
| Nie et al., 2020            | 2 | 2 | 2 | 3 | 1 | 3 | 3 |
| Nunez et al., 2021          | 2 | 2 | 2 | 2 | 1 | 3 | 2 |
| O'Horo et al., 2021         | 2 | 2 | 2 | 2 | 1 | 1 | 1 |
| Okoh et al., 2020           | 2 | 2 | 2 | 2 | 1 | 1 | 1 |
| Oto et al., 2021            | 2 | 2 | 2 | 3 | 1 | 1 | 2 |
| Ouldali et al., 2021        | 2 | 2 | 2 | 3 | 1 | 2 | 2 |
| Ozdemir et al., 2021        | 2 | 2 | 2 | 2 | 1 | 1 | 1 |
| Ozturk et al., 2020         | 2 | 2 | 2 | 2 | 1 | 1 | 1 |
| Park et al., 2021           | 2 | 2 | 2 | 2 | 1 | 3 | 2 |
| Park et al., 2020           | 2 | 2 | 2 | 2 | 2 | 3 | 2 |
| Parlak et al., 2021         | 2 | 2 | 2 | 2 | 1 | 3 | 2 |
| Pascual et al., 2020        | 2 | 2 | 3 | 3 | 2 | 3 | 3 |
| Passamonti et al., 2020     | 2 | 2 | 2 | 3 | 1 | 1 | 2 |
| Patel et al., 2020          | 2 | 2 | 2 | 2 | 1 | 2 | 1 |
| Pepe et al., 2021           | 2 | 2 | 1 | 2 | 1 | 1 | 1 |
| Peiro et al., 2021          | 2 | 2 | 2 | 3 | 1 | 3 | 3 |
| Pinato et al., 2020         | 2 | 2 | 3 | 3 | 3 | 3 | 3 |
| Pineiro et al., 2021        | 2 | 2 | 1 | 3 | 1 | 3 | 3 |
| Pizzini et al., 2020        | 2 | 2 | 3 | 3 | 1 | 3 | 3 |
| Plotnikow et al., 2020      | 2 | 2 | 3 | 3 | 1 | 2 | 3 |
| Pongpirul et al., 2020      | 2 | 2 | 1 | 2 | 1 | 3 | 2 |
| Prado-Galbarro et al., 2020 | 2 | 2 | 2 | 2 | 1 | 3 | 2 |
| Qian et al., 2020           | 2 | 2 | 2 | 2 | 1 | 3 | 2 |
| Qin et al., 2020            | 2 | 2 | 2 | 2 | 1 | 3 | 2 |

|                           |   |   |   |   |   |   |   |
|---------------------------|---|---|---|---|---|---|---|
| Qin et al., 2021          | 2 | 2 | 1 | 2 | 1 | 3 | 2 |
| Qin et al., 2021          | 2 | 2 | 2 | 3 | 1 | 1 | 2 |
| Quisi et al., 2020        | 2 | 2 | 1 | 2 | 1 | 3 | 2 |
| Raimondi et al., 2021     | 2 | 2 | 2 | 3 | 1 | 3 | 3 |
| Ramaswamy et al., 2020    | 2 | 2 | 3 | 3 | 1 | 3 | 3 |
| Ramos-Rincon et al., 2020 | 2 | 2 | 1 | 3 | 1 | 3 | 3 |
| Rastad et al., 2021       | 2 | 2 | 2 | 3 | 2 | 3 | 3 |
| Aggarwal et al. 2020      | 2 | 2 | 1 | 2 | 1 | 3 | 2 |
| Al-Rousan, 2020           | 1 | 3 | 3 | 2 | 3 | 2 | 3 |
| Bezzio et al. 2020        | 1 | 2 | 3 | 2 | 2 | 3 | 3 |
| Bi et al. 2020            | 1 | 2 | 1 | 1 | 1 | 1 | 1 |
| Bi et al. 2020            | 2 | 2 | 3 | 2 | 1 | 3 | 3 |
| MMWR, 2020                | 1 | 3 | 3 | 2 | 1 | 2 | 3 |
| MMWR,2020                 | 1 | 3 | 3 | 2 | 1 | 2 | 3 |
| Chen et al. 2020          | 2 | 2 | 1 | 2 | 2 | 1 | 1 |
| Colaneri et al. 2020      | 2 | 2 | 3 | 3 | 1 | 1 | 3 |
| Deng G et al., 2020       | 1 | 3 | 3 | 3 | 3 | 2 | 3 |
| Deng et al, 2020          | 2 | 2 | 1 | 3 | 1 | 1 | 2 |
| Du et al. 2020b           | 2 | 2 | 1 | 2 | 1 | 1 | 1 |
| Du et al., 2020a          | 2 | 2 | 3 | 2 | 1 | 3 | 3 |
| Dudley et al. 2020        | 1 | 3 | 3 | 3 | 3 | 3 | 3 |
| Feng et al. 2020          | 2 | 2 | 1 | 2 | 2 | 1 | 1 |
| Gong et al., 2020         | 2 | 2 | 3 | 3 | 2 | 3 | 3 |
| Grasselli et al.2020      | 2 | 2 | 1 | 2 | 2 | 3 | 2 |

|                            |   |   |   |   |   |   |   |
|----------------------------|---|---|---|---|---|---|---|
| Guan et al., 2020a         | 1 | 2 | 1 | 2 | 2 | 3 | 2 |
| Guan et al, 2020b          | 2 | 2 | 3 | 2 | 2 | 3 | 3 |
| Guo et al., 2020           | 1 | 2 | 1 | 1 | 2 | 3 | 2 |
| Han et al., 2020           | 1 | 2 | 1 | 3 | 1 | 3 | 3 |
| Hu et al., 2020            | 1 | 2 | 1 | 3 | 1 | 1 | 3 |
| Ji et al., 2020            | 1 | 2 | 3 | 2 | 1 | 1 | 2 |
| Kalligeros et al., 2020    | 2 | 2 | 1 | 1 | 1 | 3 | 2 |
| Lei et al., 2020           | 1 | 2 | 1 | 1 | 1 | 1 | 1 |
| Leung et al., 20202        | 2 | 2 | 1 | 1 | 3 | 2 | 2 |
| Li et al., 2020            | 2 | 2 | 1 | 2 | 1 | 3 | 2 |
| Li et al., 2020            | 2 | 2 | 1 | 3 | 1 | 3 | 3 |
| Lian et al., 2020          | 1 | 2 | 3 | 1 | 1 | 3 | 3 |
| Liu et al., 2020           | 2 | 2 | 1 | 1 | 1 | 1 | 1 |
| Mehta et al., 2020         | 2 | 2 | 1 | 2 | 1 | 3 | 2 |
| Middeldrop et al., 2020    | 2 | 2 | 1 | 2 | 2 | 1 | 1 |
| Nikpouraghdam et al., 2020 | 2 | 2 | 1 | 1 | 1 | 3 | 2 |
| Pei et al., 2020           | 2 | 2 | 1 | 2 | 1 | 1 | 1 |
| Pereira et al., 2020       | 2 | 2 | 1 | 3 | 1 | 1 | 2 |
| MMWR, 2020                 | 1 | 3 | 3 | 2 | 1 | 3 | 3 |
| Qin et al., 2020           | 2 | 2 | 1 | 2 | 1 | 3 | 2 |
| Qu et al., 2020            | 2 | 3 | 1 | 3 | 1 | 2 | 3 |
| Richardson et al., 2020    | 2 | 3 | 3 | 2 | 1 | 2 | 3 |
| Simonnet et al., 2020      | 2 | 2 | 1 | 3 | 1 | 3 | 3 |
| Sun et al., 2020           | 2 | 3 | 3 | 2 | 1 | 2 | 3 |

|                       |   |   |   |   |   |   |   |
|-----------------------|---|---|---|---|---|---|---|
| Sun et al., 2020      | 2 | 2 | 1 | 3 | 1 | 2 | 2 |
| Tang et al., 2020     | 2 | 2 | 1 | 3 | 1 | 1 | 2 |
| Tedeschi et al., 2020 | 2 | 2 | 1 | 3 | 3 | 3 | 3 |
| Tian et al., 2020     | 2 | 2 | 3 | 2 | 1 | 1 | 2 |
| To et al., 2020       | 2 | 2 | 3 | 2 | 1 | 3 | 3 |
| Verity et al., 2020   | 2 | 3 | 1 | 3 | 3 | 2 | 3 |
| Wan et al., 2020      | 2 | 2 | 3 | 3 | 1 | 1 | 3 |
| Wang et al., 2020     | 2 | 2 | 1 | 3 | 1 | 1 | 2 |
| Wang et al., 2020     | 2 | 3 | 1 | 3 | 1 | 2 | 3 |
| Wang et al., 2020     | 2 | 2 | 1 | 2 | 1 | 1 | 1 |
| Wei et al, 2020       | 2 | 2 | 1 | 1 | 1 | 3 | 2 |
| Wu et al.,2020        | 2 | 2 | 1 | 3 | 1 | 1 | 2 |
| Yan et al., 2020      | 2 | 2 | 1 | 3 | 1 | 1 | 2 |
| Yang G et al., 2020   | 2 | 2 | 1 | 2 | 1 | 1 | 1 |
| Yang R et al., 2020   | 2 | 2 | 3 | 3 | 1 | 1 | 3 |
| Yang X et al., 2020   | 2 | 3 | 1 | 2 | 1 | 2 | 2 |
| Yao et al., 2020      | 2 | 2 | 1 | 2 | 1 | 1 | 1 |
| Zhang R et al., 2020  | 2 | 2 | 3 | 2 | 1 | 3 | 3 |
| Zou et al.2020        | 2 | 2 | 3 | 3 | 1 | 1 | 3 |
| Zhang et al. 2020     | 2 | 2 | 3 | 3 | 1 | 3 | 3 |
| Zhang et al. 2020     | 2 | 2 | 1 | 3 | 1 | 3 | 3 |
| Zhang et al.2020      | 2 | 1 | 1 | 3 | 1 | 2 | 2 |
| Zhang et al. 2020     | 2 | 2 | 3 | 3 | 1 | 3 | 3 |



|                               |   |   |   |   |   |   |   |
|-------------------------------|---|---|---|---|---|---|---|
| Yu et al. 2020                | 1 | 3 | 1 | 2 | 1 | 2 | 2 |
| Hu et al., 2020               | 2 | 2 | 1 | 1 | 1 | 1 | 1 |
| Shi et al., 2020              | 2 | 3 | 1 | 3 | 3 | 3 | 3 |
| Chen R et al., 2020           | 1 | 2 | 1 | 1 | 1 | 1 | 1 |
| Dong Y et al., 2020           | 2 | 2 | 3 | 3 | 3 | 3 | 3 |
| MMWR 2020                     | 1 | 3 | 3 | 2 | 1 | 2 | 3 |
| Tao et al. 2020               | 2 | 2 | 3 | 2 | 1 | 2 | 2 |
| Tatum et al. 2020             | 2 | 3 | 3 | 2 | 3 | 2 | 3 |
| Tehrani et al. 2021           | 2 | 1 | 2 | 2 | 3 | 1 | 2 |
| Telle et al. 2021             | 1 | 3 | 2 | 2 | 3 | 2 | 3 |
| Temkin-Greener et al. 2020    | 1 | 3 | 3 | 2 | 3 | 2 | 3 |
| Tesoriero et al. 2020         | 1 | 2 | 1 | 2 | 3 | 2 | 2 |
| Tessitore et al. 2021         | 2 | 2 | 2 | 2 | 3 | 2 | 2 |
| Recinella et all., 2020       | 2 | 3 | 3 | 3 | 1 | 2 | 3 |
| Ren et all., 2020             | 2 | 2 | 3 | 3 | 1 | 2 | 3 |
| Rieg et all., 2020            | 2 | 2 | 2 | 2 | 1 | 1 | 2 |
| Rivera-Izquierdo et al., 2020 | 2 | 2 | 2 | 3 | 1 | 1 | 2 |
| Rivinius et al., 2020         | 2 | 2 | 3 | 2 | 2 | 1 | 3 |
| Roberts et al., 2020          | 2 | 2 | 3 | 3 | 2 | 2 | 3 |
| Gostner et al., 2020          | 2 | 3 | 3 | 3 | 1 | 2 | 3 |
| Rodilla et al., 2021          | 2 | 2 | 1 | 2 | 1 | 1 | 1 |
| Rodriguez et al., 2020        | 2 | 2 | 3 | 2 | 1 | 1 | 2 |
| Diaz et all., 2020            | 2 | 3 | 1 | 2 | 1 | 1 | 2 |
| Molinero et al., 2020         | 2 | 2 | 1 | 2 | 1 | 1 | 1 |

|                        |   |   |   |   |   |   |   |
|------------------------|---|---|---|---|---|---|---|
| Roedl et al., 2020     | 2 | 2 | 1 | 2 | 2 | 1 | 1 |
| Rokni et al., 2020     | 2 | 2 | 2 | 2 | 1 | 1 | 1 |
| Rosenthal et al., 2020 | 1 | 2 | 1 | 2 | 1 | 1 | 1 |
| Rossi et al., 2020     | 2 | 2 | 3 | 2 | 2 | 1 | 2 |
| Rottoli et al., 2020   | 2 | 2 | 1 | 2 | 3 | 1 | 2 |
| Russo et al., 2020     | 2 | 3 | 1 | 3 | 3 | 1 | 3 |
| Ruthrich et al., 2021  | 2 | 2 | 1 | 2 | 2 | 1 | 1 |
| Rutten et al., 2020    | 2 | 2 | 2 | 3 | 1 | 2 | 2 |
| Saand et al., 2020     | 2 | 3 | 2 | 2 | 1 | 2 | 2 |
| Sadeghi et al., 2020   | 3 | 3 | 3 | 2 | 1 | 1 | 3 |
| Saeed et al., 2020     | 3 | 2 | 1 | 2 | 2 | 1 | 2 |
| Saez-Giménez et al.,   | 2 | 2 | 3 | 2 | 2 | 1 | 2 |
| Saggi et al., 2020     | 2 | 3 | 2 | 3 | 1 | 1 | 3 |
| Saha et al., 2021      | 2 | 3 | 3 | 3 | 1 | 1 | 3 |
| Sai et al., 2021       | 2 | 2 | 3 | 2 | 1 | 1 | 2 |
| Saifi et al., 2021     | 2 | 2 | 2 | 3 | 2 | 1 | 2 |
| Salazer et al., 2021   | 2 | 2 | 1 | 2 | 1 | 1 | 1 |
| Saleh et al., 2021     | 2 | 2 | 3 | 2 | 1 | 1 | 2 |
| Sands et al., 2020     | 2 | 2 | 1 | 3 | 1 | 1 | 2 |
| Sano et al., 2020      | 3 | 2 | 3 | 3 | 2 | 1 | 3 |
| Santos et al., 2020    | 3 | 2 | 1 | 3 | 2 | 3 | 3 |
| M. Santos et al., 2020 | 2 | 2 | 1 | 3 | 1 | 1 | 2 |
| Santus et al., 2020    | 2 | 2 | 2 | 2 | 2 | 3 | 2 |
| Sapey et al., 2020     | 2 | 2 | 1 | 2 | 2 | 2 | 2 |

|                       |   |   |   |   |   |   |   |
|-----------------------|---|---|---|---|---|---|---|
| Scarfo et al., 2020   | 3 | 2 | 3 | 3 | 2 | 3 | 3 |
| Schultze et al., 2020 | 2 | 2 | 1 | 2 | 1 | 3 | 2 |
| Wang et al., 2021     | 2 | 2 | 2 | 1 | 1 | 1 | 1 |
| Y.Wang et al., 2020   | 2 | 2 | 3 | 1 | 2 | 1 | 2 |
| Yao et al., 2021      | 2 | 2 | 3 | 2 | 3 | 1 | 3 |
| Zhou et al., 2020     | 3 | 2 | 1 | 1 | 1 | 1 | 2 |
| Ye et al., 2020       | 2 | 2 | 3 | 3 | 3 | 1 | 3 |
| Wang Z et al, 2020    | 2 | 2 | 2 | 3 | 2 | 1 | 2 |
| Wargny et al., 2021   | 2 | 2 | 2 | 2 | 2 | 3 | 2 |
| Webb et al., 2020     | 3 | 2 | 1 | 1 | 1 | 2 | 2 |
| Wei et al.,2020       | 2 | 2 | 3 | 1 | 2 | 1 | 2 |
| Wei X et al., 2020    | 2 | 2 | 3 | 3 | 2 | 1 | 3 |
| Wei Z et al, 2021     | 2 | 2 | 1 | 2 | 2 | 1 | 1 |
| Wen et al., 2021      | 2 | 2 | 1 | 1 | 1 | 1 | 1 |
| Williams et al., 2021 | 2 | 2 | 1 | 2 | 2 | 1 | 1 |
| Betech et al., 2020   | 2 | 2 | 3 | 3 | 1 | 1 | 3 |
| Wu et al., 2020       | 3 | 2 | 3 | 2 | 1 | 1 | 3 |
| Wu, F et al., 2020    | 3 | 2 | 1 | 2 | 2 | 1 | 2 |
| Wu, M et al., 2020    | 2 | 2 | 2 | 2 | 2 | 1 | 1 |
| Xie et al., 2020      | 2 | 2 | 1 | 2 | 2 | 1 | 1 |
| Xie,Y et al., 2020    | 3 | 2 | 3 | 3 | 3 | 1 | 3 |
| Xiong et al., 2020    | 3 | 2 | 3 | 3 | 1 | 1 | 3 |
| Xiong, S et al., 2020 | 3 | 2 | 3 | 3 | 1 | 1 | 3 |
| Xu B. et al., 2020    | 2 | 2 | 3 | 3 | 1 | 3 | 3 |

|                            |   |   |   |   |   |   |   |
|----------------------------|---|---|---|---|---|---|---|
| Xu Jingyuan. et al., 2020  | 2 | 2 | 3 | 2 | 2 | 3 | 3 |
| Xu Jiqian et al., 2020     | 2 | 2 | 3 | 2 | 2 | 1 | 2 |
| Xu Peng et al., 2020       | 2 | 2 | 3 | 2 | 1 | 3 | 3 |
| Yan Chengxi et al., 2021   | 2 | 2 | 2 | 2 | 2 | 3 | 2 |
| Yan Q. et al., 2020        | 2 | 2 | 1 | 2 | 2 | 1 | 1 |
| Yang C. et al., 2021       | 2 | 2 | 2 | 2 | 2 | 1 | 1 |
| Yang D. et al., 2020       | 2 | 2 | 1 | 2 | 2 | 1 | 1 |
| Yang G. et al., 2020       | 2 | 2 | 1 | 2 | 1 | 1 | 1 |
| Yang K. et al., 2020       | 3 | 2 | 2 | 1 | 1 | 1 | 2 |
| Yang Q. et al., 2020       | 2 | 2 | 3 | 3 | 2 | 3 | 3 |
| Yang X. et al., 2020       | 2 | 2 | 2 | 3 | 1 | 1 | 2 |
| Yarza et al., 2020         | 3 | 2 | 1 | 3 | 2 | 1 | 3 |
| Yayla et al., 2020         | 2 | 2 | 2 | 3 | 2 | 1 | 2 |
| Yehia et al., 2020         | 2 | 2 | 1 | 2 | 3 | 1 | 2 |
| Yu Caizheng et al., (2020) | 2 | 2 | 1 | 3 | 2 | 1 | 2 |
| Yu Y. et al., 2020         | 2 | 2 | 1 | 2 | 2 | 1 | 1 |
| Yue et al., 2021           | 3 | 2 | 2 | 2 | 2 | 1 | 2 |
| Zachariah et al., 2020     | 3 | 2 | 3 | 2 | 2 | 1 | 3 |
| Ziener et al., 2020        | 2 | 3 | 1 | 3 | 2 | 1 | 3 |
| Zeng H. et al., 2020       | 2 | 2 | 1 | 2 | 2 | 1 | 1 |
| Zeng Z. et al., 2020       | 2 | 2 | 1 | 3 | 1 | 1 | 2 |
| Zhang Hongmei et al., 2020 | 3 | 2 | 2 | 2 | 2 | 1 | 2 |
| Zhang Hongyan et al., 2020 | 3 | 2 | 2 | 2 | 2 | 1 | 2 |

|                           |   |   |   |   |   |   |   |
|---------------------------|---|---|---|---|---|---|---|
| Zhang Jing et al., 2020   | 2 | 2 | 3 | 1 | 1 | 1 | 2 |
| Zhang Lin et al., 2020    | 2 | 2 | 1 | 2 | 3 | 1 | 2 |
| Zhang L. el al., 2020     | 3 | 2 | 1 | 2 | 1 | 1 | 2 |
| Zhang Lijuan et al., 2020 | 2 | 2 | 1 | 1 | 1 | 1 | 1 |
| Zhang Nan et al., 2020    | 3 | 2 | 1 | 1 | 1 | 1 | 2 |
| Xu Xunhua et al., 2020    | 3 | 2 | 3 | 2 | 2 | 1 | 3 |
| Zhang Nannan et al., 2021 | 3 | 2 | 3 | 2 | 1 | 3 | 3 |
| Zhang Q. et al., 2020     | 3 | 2 | 3 | 3 | 2 | 1 | 3 |
| Zhang S. et al.,2020      | 2 | 2 | 2 | 2 | 2 | 1 | 1 |
| Zhang W. et al., 2021     | 3 | 2 | 1 | 2 | 2 | 1 | 2 |
| Zhang Y. et al., 2021     | 2 | 2 | 3 | 2 | 1 | 1 | 2 |
| Zhao J. et al., 2021      | 2 | 2 | 3 | 2 | 2 | 1 | 2 |
| Zhao M., et al., 2020     | 2 | 2 | 3 | 3 | 3 | 2 | 3 |
| Zhao Y. et al., 2020      | 2 | 2 | 3 | 2 | 1 | 1 | 3 |
| Zheng B. et al., 2021     | 3 | 2 | 1 | 2 | 2 | 1 | 2 |
| Zheng T. et al., 2020     | 2 | 2 | 2 | 3 | 2 | 1 | 2 |
| Zhong Y. et al., 2020     | 3 | 2 | 1 | 3 | 2 | 1 | 3 |
| Zhou Jun et al., 2021     | 2 | 2 | 3 | 3 | 2 | 3 | 3 |
| Zhou J. et al., 2020      | 2 | 2 | 1 | 3 | 2 | 3 | 3 |
| Zhou S. et al., 2020      | 2 | 2 | 1 | 3 | 2 | 1 | 2 |
| Zhou Wei et al., 2021     | 2 | 2 | 2 | 1 | 1 | 1 | 1 |
| Zhou Yiwu et al., 2020    | 2 | 2 | 3 | 3 | 1 | 1 | 3 |
| He Y. et al., 2020        | 1 | 2 | 3 | 1 | 1 | 1 | 2 |
| Zhu B. et al., 2020       | 2 | 2 | 1 | 1 | 1 | 1 | 1 |

|                                   |   |   |   |   |   |   |   |
|-----------------------------------|---|---|---|---|---|---|---|
| Zhu Y. et al., 2021               | 3 | 2 | 2 | 3 | 2 | 1 | 3 |
| <u>Zieleskiewicz</u> et al., 2020 | 2 | 2 | 3 | 2 | 2 | 1 | 2 |
| Zou X. et al., 2020               | 2 | 2 | 1 | 3 | 2 | 1 | 2 |
| Zuniga et al., 2021               | 2 | 2 | 1 | 3 | 1 | 1 | 2 |
| Zuo P. et al., 2020               | 3 | 2 | 1 | 2 | 1 | 1 | 2 |
| Thompson et al., 2020             | 2 | 2 | 2 | 2 | 2 | 1 | 1 |
| Tian et al., 2020                 | 2 | 2 | 1 | 2 | 2 | 1 | 1 |
| Tobolowsky et al., 2021           | 3 | 2 | 3 | 3 | 2 | 1 | 3 |
| Toh et al., 2021                  | 3 | 2 | 3 | 3 | 2 | 1 | 3 |
| Tomasoni et al., 2020             | 2 | 2 | 1 | 3 | 2 | 1 | 2 |
| Tong et al., 2020                 | 3 | 2 | 1 | 3 | 1 | 1 | 3 |
| Albalawi et al., 2021             | 2 | 2 | 2 | 2 | 2 | 1 | 1 |
| Trifan et al., 2020               | 3 | 2 | 1 | 3 | 2 | 1 | 3 |
| Argirios et al., 2020             | 3 | 2 | 3 | 2 | 1 | 1 | 3 |
| Tu et al., 2021                   | 2 | 2 | 3 | 2 | 1 | 1 | 2 |
| Yildirim et al., 2021             | 2 | 2 | 3 | 2 | 2 | 1 | 2 |
| Turgutalp et al., 2021            | 2 | 2 | 3 | 2 | 1 | 1 | 2 |
| Haq et al., 2020                  | 2 | 2 | 1 | 2 | 1 | 1 | 1 |
| Vanhems et al., 2021              | 2 | 2 | 1 | 2 | 2 | 1 | 1 |
| Venturini et al., 2021            | 2 | 2 | 3 | 3 | 2 | 1 | 3 |
| Zertuche et al., 2021             | 2 | 2 | 1 | 3 | 2 | 1 | 2 |
| Verma et al., 2021                | 2 | 2 | 2 | 2 | 2 | 1 | 1 |
| Llamas et al., 2021               | 2 | 2 | 2 | 2 | 2 | 1 | 1 |

|                           |   |   |   |   |   |   |   |
|---------------------------|---|---|---|---|---|---|---|
| Villa et al., 2021        | 2 | 2 | 3 | 3 | 2 | 1 | 3 |
| Vizcarra et al., 2020     | 2 | 2 | 2 | 2 | 2 | 1 | 1 |
| Vrillon et al., 2021      | 2 | 2 | 3 | 2 | 2 | 1 | 2 |
| Vrotsou et al., 2021      | 2 | 2 | 3 | 2 | 2 | 1 | 2 |
| Vu et al., 2020           | 3 | 2 | 3 | 2 | 1 | 1 | 3 |
| Wang F et al., 2020       | 2 | 2 | 1 | 1 | 1 | 1 | 1 |
| Wang Fang et al., 2020    | 2 | 2 | 1 | 2 | 1 | 1 | 1 |
| Wang Gang et al., 2021    | 1 | 2 | 1 | 1 | 1 | 1 | 1 |
| Wang Guyi et al.,         | 2 | 2 | 1 | 2 | 2 | 1 | 1 |
| Wang Juan et al., 2020    | 2 | 2 | 3 | 2 | 1 | 1 | 2 |
| Wang Junhong et al., 2020 | 2 | 2 | 3 | 3 | 2 | 1 | 3 |
| Wang Lang et al., 2020    | 2 | 2 | 3 | 1 | 1 | 1 | 2 |
| Wang Peng et al., 2020    | 3 | 2 | 3 | 1 | 2 | 1 | 3 |
| Wang Sijiao et al., 2020  | 2 | 2 | 3 | 2 | 2 | 1 | 2 |
| Wang Sufei et al., 2020   | 2 | 2 | 3 | 3 | 2 | 1 | 3 |
| Wang Tao et al., 2020     | 2 | 2 | 2 | 2 | 2 | 1 | 1 |
| Wang Wen et al., 2021     | 2 | 2 | 3 | 2 | 1 | 1 | 2 |
| Wang Wenjun et al.,2021   | 2 | 2 | 1 | 2 | 2 | 1 | 1 |
| Wang X. et al., 2020      | 2 | 2 | 3 | 2 | 2 | 1 | 2 |
| Seo et al., 2021          | 2 | 2 | 1 | 1 | 1 | 1 | 1 |
| Shah et al., 2020         | 3 | 2 | 3 | 3 | 2 | 1 | 3 |
| Shahriarirad et al, 2020  | 3 | 2 | 3 | 1 | 2 | 1 | 3 |
| Shao et al., 2020         | 3 | 2 | 3 | 2 | 1 | 1 | 3 |

|                               |   |   |   |   |   |   |   |
|-------------------------------|---|---|---|---|---|---|---|
| Stringer et al., 2021         | 2 | 2 | 1 | 2 | 3 | 1 | 2 |
| Sharma et al., 2021           | 3 | 2 | 2 | 3 | 1 | 1 | 3 |
| Shi J et al., 2020            | 2 | 2 | 1 | 2 | 2 | 3 | 2 |
| Shi M et al, 2020             | 2 | 2 | 3 | 3 | 2 | 1 | 3 |
| Shields et al., 2020          | 3 | 3 | 3 | 3 | 3 | 3 | 3 |
| Siepmann et al., 2021         | 2 | 2 | 2 | 2 | 1 | 1 | 1 |
| Singh B et al., 2020          | 2 | 2 | 1 | 2 | 1 | 1 | 1 |
| Singh S et al., 2020          | 2 | 2 | 3 | 2 | 1 | 1 | 2 |
| Singh Shailendra et al., 2020 | 2 | 2 | 2 | 2 | 2 | 1 | 1 |
| Singh Shailendra et al., 2020 | 2 | 2 | 3 | 2 | 2 | 1 | 2 |
| Smati et al., 2020            | 2 | 2 | 1 | 1 | 1 | 1 | 1 |
| Smith A et al., 2020          | 2 | 2 | 3 | 3 | 2 | 1 | 3 |
| Smith M et al., 2020          | 2 | 2 | 3 | 3 | 1 | 1 | 3 |
| Snipelisky et al., 2020       | 3 | 2 | 3 | 1 | 1 | 1 | 2 |
| Soh et al., 2020              | 2 | 2 | 2 | 2 | 1 | 1 | 1 |
| Soleimani, 2020               | 2 | 2 | 1 | 3 | 1 | 1 | 2 |
| Song Jia et al., 2020         | 3 | 2 | 3 | 1 | 2 | 1 | 3 |
| Song Jin-Wen 2020             | 3 | 2 | 3 | 2 | 1 | 1 | 2 |
| Stachura et al., 2021         | 3 | 2 | 1 | 2 | 2 | 1 | 2 |
| Stall et al., 2020            | 2 | 2 | 1 | 1 | 2 | 1 | 2 |
| Stefan et al., 2021           | 3 | 2 | 1 | 3 | 2 | 1 | 3 |
| Steinberg et al., 2020        | 2 | 2 | 3 | 3 | 2 | 1 | 3 |
| Sulyeman et al., 2020         | 2 | 2 | 1 | 1 | 1 | 1 | 1 |
| Sun et al., 2020              | 2 | 2 | 3 | 2 | 2 | 1 | 2 |



|                        |   |   |   |   |   |   |   |
|------------------------|---|---|---|---|---|---|---|
| Suresh et al., 2021    | 2 | 2 | 1 | 2 | 1 | 1 | 1 |
| Swan et al., 2020      | 2 | 2 | 3 | 2 | 2 | 3 | 3 |
| Szymanski et al., 2021 | 2 | 2 | 3 | 2 | 1 | 2 | 2 |
| Talavera et al., 2020  | 2 | 2 | 1 | 2 | 1 | 1 | 1 |
| Tang et al., 2020      | 2 | 2 | 2 | 3 | 2 | 1 | 2 |
| Botero et al, 2020     | 2 | 2 | 2 | 3 | 2 | 1 | 2 |
| Zhao X. et al, 2020    | 2 | 2 | 1 | 1 | 1 | 1 | 1 |
