# Supplementary material for: Heterogeneity and Risk of Bias in Studies Examining Risk Factors for Severe Illness and Death in COVID-19: A Systematic Review and Meta-Analysis
Source: MDPI journal article supplement (doi:10.3390/pathogens11050563), 2022-05-10
Supplement: s1 [file s1]

# **Heterogeneity and risk of bias in studies examining risk factors for severe illness and death in COVID-19: a systematic review and meta-analysis**

Abraham Degarege \*, Zaeema Naveed, Josiane Kabayundo, David Brett-Major

**Table S5: Forest plot showing the relationship of hypertension with the odds of severe illness among COVID-19 patients**

| <b>Author, year</b>        | <b>OR</b> | <b>LCI</b> | <b>UCI</b> |
|----------------------------|-----------|------------|------------|
| Aiswarya et al., 2020      | 0.95      | 0.18       | 4.83       |
| Algado-Sellés et al., 2020 | 3.2       | 0.7        | 13.5       |
| Allard et al., 2020        | 1.44      | 0.63       | 3.32       |
| Allenbach et al., 2020     | 1.05      | 0.52       | 2.1        |
| Alqahtani et al., 2020     | 92.8      | 39.26      | 219.36     |
| Alsharidah et al., 2021    | 1.34      | 0.86       | 2.09       |
| Annweiler et al., 2020     | 0.51      | 0.11       | 2.33       |
| Basaran et al., 2021       | 2.47      | 1.03       | 5.94       |
| Basaran et al., 2021       | 2.47      | 1.03       | 5.94       |
| Bauer et al., 2020         | 1.33      | 0.95       | 1.84       |
| Bhargava et al., 2020      | 1.55      | 0.81       | 2.98       |
| Bolouri et al., 2021       | 0.84      | 0.29       | 2.38       |
| Bravi et al., 2020         | 1.1       | 0.8        | 1.47       |
| Cabello et al., 2021       | 5.09      | 1.34       | 19.02      |
| Cai et al., 2020           | 2.28      | 1.25       | 4.14       |
| Cekerevac et al., 2021     | 3.78      | 1.81       | 7.91       |
| Cen et al., 2020           | 2.9       | 2.12       | 3.96       |
| Chaudhry et al., 2020      | 1.61      | 0.28       | 9.23       |
| Chen et al., 2020          | 1.81      | 0.71       | 4.62       |
| Chen Q et al., 2020        | 1.81      | 0.71       | 4.62       |
| Chen Z et al., 2020        | 2.41      | 1.68       | 3.43       |
| Cheng et al., 2020         | 1.45      | 0.64       | 3.19       |
| Cizmecioglu et al., 2020   | 1         | 0.22       | 4.5        |
| Colaneri et al., 2020      | 0.7       | 0.19       | 2.61       |
| Deng et al., 2020          | 1.53      | 0.67       | 3.51       |
| Du et al., 2020            | 0.8       | 0.37       | 1.73       |
| Du et al., 2020            | 0.8       | 0.37       | 1.73       |
| Duan et al., 2020          | 3.31      | 1.02       | 10.73      |
| Feng et al., 2020          | 1.82      | 1.15       | 2.87       |
| Gao et al., 2020           | 1.86      | 1.56       | 2.23       |
| Gao et al., 2020           | 3.36      | 1.41       | 9.52       |
| Ghaffari et al., 2021      | 1.75      | 1.07       | 2.87       |
| Guan et al., 2020          | 3.37      | 2.5        | 4.57       |
| Hu et al., 2020            | 1.78      | 1.11       | 2.88       |
| Hu et al., 2021            | 2.75      | 0.89       | 8.43       |
| Huang et al., 2020         | 0.53      | 0.12       | 2.42       |
| Huang S et al., 2020       | 1.56      | 0.93       | 2.62       |
| Jain et al., 2021          | 1.63      | 0.5        | 5.29       |
| Jang et al., 2020          | 1         | 0.09       | 10.78      |
| Kaeuffer et al., 2020      | 1.14      | 0.89       | 1.47       |
| Karahan et al., 2020       | 4.66      | 2.22       | 9.8        |

|                                    |      |      |       |
|------------------------------------|------|------|-------|
| Khan et a., 2020                   | 2.28 | 1.23 | 4.2   |
| Lara et al., 2020                  | 1.95 | 0.69 | 5.49  |
| Li et al., 2020                    | 2.2  | 1.51 | 3.2   |
| Li et al.,2020                     | 1.59 | 0.24 | 10.18 |
| Li T et al., 2020                  | 6.16 | 3.46 | 10.97 |
| Liu J etal., 2021                  | 2.03 | 0.93 | 4.46  |
| Liu S et al., 2020                 | 1.06 | 0.47 | 2.4   |
| Molinero et al., 2020              | 1.48 | 1    | 3.22  |
| Nachega et al., 2020               | 3.66 | 2.57 | 5.21  |
| Nguyen et al., 2020                | 1.19 | 0.71 | 1.99  |
| Nie Y et al., 2020                 | 0.49 | 0.16 | 1.45  |
| Pei et al., 2020                   | 1.71 | 1.06 | 2.76  |
| Pereira et al., 2020               | 1.66 | 0.64 | 4.38  |
| Qin et al., 2020                   | 2.62 | 1.65 | 4.17  |
| Ren et al., 2020                   | 3.29 | 1.42 | 7.63  |
| Sadeghi-Haddad-Zavareh et al.,2020 | 0.64 | 0.4  | 1.02  |
| Shahriarirad et al., 2020          | 4.17 | 1.14 | 15.22 |
| Shao et al., 2020                  | 3.25 | 1.29 | 8.17  |
| Shi et al., 2020                   | 0.52 | 0.21 | 18.88 |
| Shi et al.,2020                    | 5.65 | 3.05 | 10.45 |
| Siepmann et al., 2020              | 5.99 | 2.28 | 15.79 |
| Song et al, 2020                   | 14   | 1.36 | 21.83 |
| Stachura et al., 2021              | 2.66 | 1.18 | 5.97  |
| Stefan et al., 2020                | 1.91 | 0.32 | 11.47 |
| Sun et al., 2020                   | 12.6 | 2.18 | 73.4  |
| Tao et al., 2020                   | 4.44 | 1.72 | 11.48 |
| Tian et al., 2020                  | 1.7  | 0.97 | 2.97  |
| To et al., 2020                    | 3.66 | 0.51 | 26.2  |
| Vee et al., 2020                   | 8.79 | 2.9  | 26.65 |
| Villa et al., 2021                 | 1    | 0.07 | 13.37 |
| Vizcarra et al., 2020              | 1.2  | 0.33 | 4.42  |
| Wan et al., 2020                   | 1.06 | 0.3  | 3.67  |
| Wang et al., 2021                  | 0.8  | 0.3  | 2.13  |
| Wang Junhong et al., 2020          | 2.02 | 1.11 | 3.69  |
| Wang Sijiao et al., 2020           | 3.44 | 1.06 | 11.16 |
| Wang Wen et al., 2021              | 5.05 | 1.73 | 14.48 |
| Wang Wenjun et al., 2021           | 1.64 | 1.36 | 1.99  |
| Wang X. et al., 2020               | 1.39 | 0.57 | 3.37  |
| Wei et al., 2020                   | 2.1  | 1.22 | 3.6   |
| Wei X et al., 2020                 | 2.37 | 1.62 | 3.46  |
| Xie Y et all., 2020                | 5.37 | 1.76 | 16.87 |
| Xiong S et al., 2020               | 1.98 | 0.93 | 4.23  |
| Yang et al., 2020                  | 1.13 | 0.65 | 1.98  |
| Yang G. et al., 2020               | 1.44 | 0.76 | 2.73  |
| Yang Q. et al., 2020               | 4.7  | 2.02 | 10.94 |

|                                            |             |             |             |
|--------------------------------------------|-------------|-------------|-------------|
| Yu et al., 2020                            | 0.7         | 0.2         | 2           |
| Yu Y. et al., 2020                         | 0.7         | 0.13        | 3.86        |
| Zhang et al., 2020                         | 10.7        | 3.56        | 32.12       |
| Zhang et al., 2020                         | 22          | 6.03        | 80.3        |
| Zhang Hongmei et al., 2020                 | 3.3         | 0.96        | 11.31       |
| Zhang Hongyan et al., 2020                 | 1.66        | 0.74        | 3.74        |
| Zhang Jing et al., 2020                    | 1.97        | 1.43        | 2.71        |
| Zhang Nannan et al., 2021                  | 1.24        | 0.13        | 11.75       |
| Zhang Q et al., 2020                       | 1.69        | 0.65        | 4.38        |
| Zhang Y et al., 2021                       | 0.86        | 0.5         | 1.47        |
| Zhao J et al., 2021                        | 2.18        | 1.31        | 3.64        |
| Zheng B et al., 2021                       | 3.92        | 1.45        | 10.62       |
| Zhou Jun et al., 2021                      | 4.81        | 1.03        | 14.21       |
| Zhou Yiwu et al., 2020                     | 6.75        | 2.03        | 23.2        |
| <b>Total (I squared= 47.9%, p&lt;0.01)</b> | <b>1.59</b> | <b>1.41</b> | <b>1.76</b> |
