# Supplementary material for: Heterogeneity and Risk of Bias in Studies Examining Risk Factors for Severe Illness and Death in COVID-19: A Systematic Review and Meta-Analysis
Source: MDPI journal article supplement (doi:10.3390/pathogens11050563), 2022-05-10
Supplement: s1 [file s1]

# **Heterogeneity and risk of bias in studies examining risk factors for severe illness and death in COVID-19: a systematic review and meta-analysis**

Abraham Degarege \*, Zaeema Naveed, Josiane Kabayundo, David Brett-Major

**Table S15. Forest plot showing the relationship of age with the odds of severe illness among COVID-19 patients**

| <b>Author, year</b>                                             | <b>OR</b>   | <b>LCI</b>  | <b>UCI</b>  | <b>% Weight</b> |
|-----------------------------------------------------------------|-------------|-------------|-------------|-----------------|
| <b>Age in years <math>\geq 60</math> vs <math>&lt;60</math></b> |             |             |             |                 |
| Allenbach et al., 2020                                          | 2.94        | 1.19        | 7.26        | 2.37            |
| Amanat et al., 2021                                             | 1.63        | 1.23        | 2.16        | 11.32           |
| Bhargava et al., 2020                                           | 1.84        | 1.02        | 3.31        | 7.75            |
| Cheng et al., 2020                                              | 6.82        | 3.52        | 13.21       | 1.05            |
| Dai et al., 2020                                                | 3.87        | 1.28        | 11.68       | 0.92            |
| Hoffmann et al., 2021                                           | 1.85        | 0.79        | 4.31        | 5.12            |
| Huang R et al., 2020                                            | 2.09        | 0.7         | 6.22        | 2.75            |
| Li H et al., 2020                                               | 1.26        | 0.6         | 1.26        | 11.86           |
| Lian et al., 2020                                               | 4.61        | 2.81        | 7.55        | 3.46            |
| Nachega et al., 2020                                            | 4.76        | 3.31        | 6.85        | 5.09            |
| Pereira et al., 2020                                            | 3.85        | 1.46        | 10.18       | 1.27            |
| Rivinius et al., 2020                                           | 15.75       | 1.42        | 174.25      | 0.00            |
| Tao et al., 2020                                                | 2.66        | 1.02        | 6.96        | 2.45            |
| Wang J et al., 2020                                             | 6.21        | 2.11        | 18.23       | 0.40            |
| Wang Juan et al., 2020                                          | 3.75        | 2.07        | 6.8         | 3.47            |
| Wang X et al., 2020                                             | 2.1         | 1.36        | 3.25        | 8.81            |
| Yu et al., 2020                                                 | 10.79       | 3.94        | 29.53       | 0.16            |
| Zhang G et al., 2021                                            | 0.54        | 0.23        | 1.28        | 11.05           |
| Zhang Y et al., 2020                                            | 11.47       | 4.4         | 29.88       | 0.16            |
| Zhao M et al., 2020                                             | 2.8         | 2.08        | 3.79        | 9.31            |
| Zheng T et al., 2020                                            | 1.11        | 0.72        | 1.7         | 11.21           |
| <b>Total (I squared=69.5%, p&lt;0.01)</b>                       | <b>2.14</b> | <b>1.63</b> | <b>2.66</b> | <b>100.00</b>   |
| <b>Age in years <math>\geq 65</math> vs <math>&lt;65</math></b> |             |             |             |                 |
| Algado-Sellés et al., 2020                                      | 2.9         | 0.9         | 9.3         | 1.43            |
| Bezzio et al., 2020                                             | 5.87        | 1.15        | 29.66       | 0.15            |
| Cen et al., 2020                                                | 5           | 3.66        | 6.83        | 4.99            |
| Çalık Başaran N et al., 2021                                    | 4.15        | 1.64        | 10.51       | 1.30            |
| Colaneri et al., 2020                                           | 4.06        | 1.04        | 15.72       | 0.53            |
| Derikx et al., 2020                                             | 2.94        | 1.06        | 8.17        | 1.87            |
| Du et al., 2020a                                                | 0.84        | 0.34        | 2.03        | 7.10            |
| Etienne et al., 2020                                            | 0.92        | 0.15        | 5.5         | 2.82            |
| Feng et al., 2020                                               | 2.17        | 1.39        | 3.4         | 6.64            |
| Gao et al., 2020                                                | 2.72        | 1.21        | 6.12        | 3.16            |
| Guan et al., 2020b                                              | 2.55        | 1.72        | 3.79        | 6.55            |
| Hu L et al., 2020                                               | 2.96        | 1.81        | 4.83        | 5.19            |
| Ji D et al., 2020                                               | 9.75        | 4.2         | 22.63       | 0.34            |
| Jinag N et al., 2021                                            | 2.72        | 1.31        | 5.63        | 3.68            |
| Khan et al., 2020                                               | 3.15        | 1.4         | 7.09        | 2.60            |
| Lee Y et al., 2020                                              | 4.32        | 2.73        | 6.84        | 3.89            |
| Li X et al., 2020                                               | 2.24        | 1.94        | 2.78        | 8.13            |
| Liu J et al., 2021                                              | 1.09        | 1.05        | 1.46        | 8.43            |

|                                            |             |               |              |               |
|--------------------------------------------|-------------|---------------|--------------|---------------|
| Liu S et al., 2020                         | 6.56        | 3.7           | 11.64        | 1.57          |
| Ren et al., 2020                           | 5.81        | 2.14          | 15.78        | 0.60          |
| Scarfo et al., 2020                        | 3.72        | 1.79          | 7.71         | 2.46          |
| Shahriarirad et al., 2020                  | 0.87        | 0.21          | 3.51         | 4.82          |
| Sun L et al., 2020                         | 21.7        | 3.78          | 124.5        | 0.01          |
| Tian S et al., 2020                        | 5.16        | 2.55          | 10.45        | 1.58          |
| Vee et al., 2020                           | 3.8         | 0.74          | 19.58        | 0.33          |
| Wang Fang et al., 2020                     | 3.22        | 1.51          | 6.87         | 2.82          |
| Wang Wen et al., 2021                      | 1.92        | 0.5           | 6.24         | 2.57          |
| Wei Z et al., 2021                         | 1.68        | 0.55          | 5.07         | 3.49          |
| Wu J et al., 2020                          | 12.75       | 6.74          | 24.1         | 0.38          |
| Xiong S et al., 2020                       | 3.48        | 1.57          | 7.73         | 2.32          |
| Zhao J et al., 2021                        | 2.75        | 1.57          | 4.81         | 4.90          |
| Zhou Yiwu et al., 2020                     | 2.41        | 1.02          | 5.69         | 3.36          |
| <b>Total (I squared=69.5%, p&lt;0.01)</b>  | <b>2.63</b> | <b>2.08</b>   | <b>3.18</b>  | <b>100.00</b> |
| <b>Age in years continuous</b>             |             |               |              |               |
| Annweiler et al., 2020                     | 1.05        | 0.88          | 1.25         | 1.14          |
| Fernandes et al., 2021                     | 1.09        | 1.01          | 1.18         | 4.16          |
| He et al., 2020                            | 1.07        | 1.05          | 1.08         | 13.18         |
| Huang S et al., 2020                       | 1.05        | 0.68          | 2.33         | 0.06          |
| Jain et al., 2021                          | 1.01        | 0.98          | 1.04         | 10.91         |
| Molinero et al., 2020                      | 1.01        | 0.1           | 1.02         | 0.20          |
| Nguyen et al., 2020                        | 1.49        | 1.3           | 1.7          | 0.99          |
| Stachura et al., 2021                      | 1.1         | 1.01          | 1.15         | 5.39          |
| Shao et al., 2020                          | 1.06        | 1.02          | 1.086        | 10.40         |
| Tian J et al., 2020                        | 1.04        | 1             | 1.07         | 10.07         |
| Wang F et al., 2021                        | 1.07        | 1.03          | 1.1          | 10.07         |
| Yu Y et al., 2020                          | 1.03        | 1.02          | 1.05         | 13.18         |
| Zhang R et al., 2020                       | 1.1         | 1             | 1.1          | 7.74          |
| Zhang Y et al., 2021                       | 1.03        | 1.01          | 1.05         | 12.51         |
| <b>Total (I squared= 74.7%, p&lt;0.01)</b> | <b>1.06</b> | <b>1.04</b>   | <b>1.08</b>  | <b>100.00</b> |
| <b>Age in years ≥ 50 vs &lt;50</b>         |             |               |              |               |
| Aiswarya et al., 2020                      | 1.18        | 0.37          | 3.71         | 42.98         |
| Alasia et al., 2021                        | 10.42       | 5.9           | 18.42        | 20.62         |
| Betti et al., 2021                         | 3.23        | 1.42          | 7.37         | 36.40         |
| <b>Total (I squared= 76.5%, p&lt;0.01)</b> | <b>3.83</b> | <b>0.03</b>   | <b>7.63</b>  | <b>100.00</b> |
| <b>Age in years ≥ 75 vs &lt;75</b>         |             |               |              |               |
| Adamuz et al., 2020                        | 1.52        | 1.02          | 2.26         | 99.77         |
| Wang Sijiao et al., 2020                   | 5.61        | 1.16          | 27.12        | 0.23          |
| <b>Total (I squared= 0.0%, p=0.537)</b>    | <b>1.53</b> | <b>0.91</b>   | <b>2.15</b>  | <b>100.00</b> |
| <b>Age in years ≥ 70 vs &lt;70</b>         |             |               |              |               |
| Jang et al., 2020                          | 3.37        | 0.26          | 43.58        | 75.73         |
| Zhang Lin et al., 2020                     | 16.19       | 3.28          | 79.8         | 24.27         |
| <b>Total (I squared= 0.0%, p= 0.568)</b>   | <b>6.48</b> | <b>-12.37</b> | <b>25.33</b> | <b>100.00</b> |
