# Supplementary material for: Heterogeneity and Risk of Bias in Studies Examining Risk Factors for Severe Illness and Death in COVID-19: A Systematic Review and Meta-Analysis
Source: MDPI journal article supplement (doi:10.3390/pathogens11050563), 2022-05-10
Supplement: s1 [file s1]

# **Heterogeneity and risk of bias in studies examining risk factors for severe illness and death in COVID-19: a systematic review and meta-analysis**

Abraham Degarege \*, Zaeema Naveed, Josiane Kabayundo, David Brett-Major

**Table S6: Forest plot showing the relationship of cardiovascular disease with the odds of death among COVID-19 patients**

| <b>Author, year</b>          | <b>OR</b> | <b>LCI</b> | <b>UCI</b> | <b>% Weight</b> |
|------------------------------|-----------|------------|------------|-----------------|
| Acar et al., 2020            | 3.29      | 1.85       | 5.85       | 0.34            |
| Agarwal et al., 2020         | 2.00      | 1.20       | 3.40       | 0.89            |
| Alberici et al., 2020        | 3.11      | 1.02       | 9.60       | 0.08            |
| Alguwaihes et al., 2021      | 1.40      | 0.40       | 4.30       | 0.35            |
| Allameh et al., 2020         | 1.51      | 0.88       | 2.62       | 1.20            |
| Anaklı et al., 2021          | 1.84      | 0.81       | 4.18       | 0.45            |
| Angelidi et al., 2021        | 2.47      | 0.43       | 14.39      | 0.03            |
| Aoun et al., 2021            | 4.42      | 2.06       | 9.49       | 0.11            |
| Attauabi et al., 2021        | 4.28      | 1.15       | 16.50      | 0.03            |
| Auld et al., 2020            | 1.13      | 0.54       | 2.35       | 1.15            |
| Azar et al., 2020            | 7.95      | 4.35       | 14.51      | 0.06            |
| Baggio et al., 2021          | 1.26      | 1.07       | 1.49       | 2.77            |
| Baqui et al., 2020           | 2.32      | 2.09       | 2.55       | 2.73            |
| Barbui et al., 2021          | 2.18      | 0.64       | 7.36       | 0.13            |
| Berenguer et al., 2020       | 3.21      | 2.75       | 3.75       | 2.02            |
| Bertsimas et al., 2020       | 1.74      | 1.2        | 2.54       | 1.59            |
| Betech et al., 2020          | 1.12      | 1.08       | 1.16       | 3.01            |
| Bossini et al., 2020         | 1.94      | 0.43       | 8.15       | 0.10            |
| Brandão et al., 2021         | 1.32      | 0.67       | 2.62       | 1.04            |
| Cabezudo-García et al., 2020 | 2.48      | 1.38       | 4.46       | 0.53            |
| Caillard et al., 2020        | 2.38      | 1.51       | 3.76       | 0.86            |
| Catteau et al., 2020         | 2.46      | 2.23       | 2.73       | 2.68            |
| Cen et al., 2020             | 5.01      | 2.35       | 10.68      | 0.09            |
| Chand et al., 2020           | 1.72      | 0.62       | 4.78       | 0.31            |
| Chen et al., 2021            | 1.41      | 0.94       | 2.13       | 1.77            |
| Chen T et al., 2020          | 2.86      | 0.74       | 11.06      | 0.06            |
| Chen Y et al., 2020          | 8.29      | 5.02       | 13.68      | 0.08            |
| Chilimuri et al., 2020       | 1.56      | 0.78       | 3.11       | 0.82            |
| Covino et al., 2020          | 1.00      | 0.33       | 2.69       | 0.8             |
| Covino et al., 2020          | 2.49      | 1.09       | 5.67       | 0.26            |
| Covino et al., 2020          | 1.35      | 0.6        | 3.01       | 0.78            |
| Dagher et al., 2021          | 1.16      | 0.59       | 2.28       | 1.25            |
| De Souza et al., 2020        | 1.15      | 0.95       | 1.39       | 2.75            |
| Deeb et al., 2021            | 2.84      | 1.61       | 5.01       | 0.45            |
| Deng et al., 2020            | 5.42      | 4.33       | 6.79       | 0.75            |
| Du et al., 2020              | 11.06     | 4.06       | 30.06      | 0.01            |
| Duarte et al., 2020          | 1.39      | 0.93       | 2.07       | 1.83            |
| Elhadi et al., 2021          | 0.92      | 0.58       | 1.44       | 2.21            |
| Escosteguy et al., 2021      | 1.31      | 0.85       | 2.04       | 1.77            |
| Falcone et al., 2020         | 2.86      | 1.65       | 4.93       | 0.48            |
| Fava et al., 2020            | 1.81      | 0.71       | 4.52       | 0.37            |
| Ferrando et al., 2020        | 4.64      | 1.15       | 18.74      | 0.02            |

|                               |       |      |       |      |
|-------------------------------|-------|------|-------|------|
| Ferrari et al., 2020          | 2.51  | 0.94 | 6.68  | 0.17 |
| Genet et al., 2020            | 1.11  | 0.59 | 2.04  | 1.48 |
| Giannoglou et al., 2020       | 2.56  | 1.27 | 5.15  | 0.36 |
| Goodall et al., 2020          | 2.12  | 1.57 | 2.85  | 1.66 |
| Grasselli et al., 2020        | 2.11  | 1.75 | 2.55  | 2.29 |
| Guan et al., 2020             | 5.56  | 2.48 | 12.45 | 0.06 |
| Halvatsiotis et al., 2020     | 0.59  | 0.17 | 1.99  | 1.14 |
| Haq et al., 2020              | 6.74  | 2.86 | 15.88 | 0.04 |
| Hashemi et al., 2020          | 0.98  | 0.46 | 2.09  | 1.30 |
| Hatami et al., 2021           | 1.70  | 1.07 | 2.7   | 1.30 |
| Hendra et al., 2021           | 0.77  | 0.26 | 2.25  | 1.02 |
| Hu J et al., 2020             | 2.13  | 0.93 | 4.91  | 0.34 |
| Hwang et al., 2020            | 3.5   | 1.03 | 12.21 | 0.05 |
| Iaccarino et al., 2020        | 1.12  | 0.8  | 1.55  | 2.36 |
| Islam et al., 2020            | 5.05  | 1.64 | 15.48 | 0.03 |
| Jimeno et al., 2020           | 2.30  | 1.10 | 4.60  | 0.43 |
| Jung et al., 2020             | 1.31  | 0.70 | 2.27  | 1.36 |
| Kim E et al., 2021            | 1.76  | 0.44 | 6.93  | 0.14 |
| Kim S et al., 2020            | 3.81  | 0.99 | 13.06 | 0.04 |
| Krause et al., 2020           | 2.25  | 0.81 | 6.26  | 0.19 |
| Krishnamoorthy et al., 2021   | 1.43  | 0.75 | 2.74  | 1.02 |
| Kunal et al., 2020            | 1.53  | 0.47 | 5.02  | 0.27 |
| Laake et al., 2020            | 2.13  | 1.26 | 3.61  | 0.81 |
| Lee L et al., 2020            | 2.32  | 1.47 | 3.64  | 0.90 |
| Li et al., 2021               | 1.36  | 0.81 | 2.31  | 1.42 |
| Liu et al., 2020              | 0.9   | 0.43 | 1.88  | 1.48 |
| Llamas et al., 2021           | 3.01  | 2.01 | 4.50  | 0.74 |
| Louapre et al., 2020          | 5.27  | 2.39 | 13.66 | 0.05 |
| Lucar et al., 2021            | 0.93  | 0.13 | 6.63  | 0.14 |
| Martinez-Lopez et al., 2020   | 1.22  | 0.56 | 2.66  | 0.95 |
| Martins et al., 2021          | 3.78  | 0.98 | 14.56 | 0.03 |
| Mash et al., 2020             | 2.85  | 1.52 | 5.35  | 0.36 |
| Mather et al., 2020           | 1.44  | 0.8  | 2.62  | 1.14 |
| Mehta et al., 2021            | 1.12  | 1.08 | 1.16  | 3.01 |
| Moghaddam et al., 2020        | 0.93  | 0.16 | 5.45  | 0.2  |
| Molinero et al., 2020         | 1.02  | 0.39 | 2.30  | 1.07 |
| Nachega et al., 2020          | 4.78  | 2.20 | 10.37 | 0.09 |
| Nachtigall et al., 2020       | 2.25  | 1.76 | 2.88  | 1.86 |
| Nepogodiev et al., 2020       | 1.81  | 1.13 | 2.89  | 1.19 |
| Nikpouraghdam et al., 2020    | 1.38  | 0.48 | 3.95  | 0.43 |
| Nunez-Gil, 2021               | 3.58  | 2.95 | 4.34  | 1.54 |
| Oto et al., 2021              | 3.70  | 1.04 | 13.08 | 0.04 |
| Park et al., 2020             | 1.37  | 0.51 | 3.71  | 0.50 |
| Patel et al., 2020            | 2.11  | 1.34 | 3.36  | 1.00 |
| Rivera-Izquierdo et al., 2020 | 12.72 | 6.28 | 25.76 | 0.02 |
| Rodriguez et al., 2020        | 3.25  | 0.39 | 26.92 | 0.01 |

|                                           |             |             |             |               |
|-------------------------------------------|-------------|-------------|-------------|---------------|
| Rokni et al., 2020                        | 1           | 0.28        | 3.58        | 0.47          |
| Rossi et al., 2020                        | 1.21        | 0.78        | 1.88        | 1.88          |
| Sai et al., 2021                          | 1.4         | 0.29        | 6.82        | 0.14          |
| Saifi et al., 2021                        | 0.45        | 0.11        | 1.85        | 1.20          |
| Salazer et al., 2021                      | 2.09        | 1.68        | 2.60        | 2.12          |
| Sands et al., 2020                        | 1.19        | 0.9         | 1.58        | 2.45          |
| Shahriarirad et al., 2020                 | 1.84        | 0.35        | 9.75        | 0.07          |
| Sharma,2020                               | 1.12        | 0.99        | 1.27        | 2.90          |
| Shi et al., 2020                          | 1.83        | 0.52        | 6.42        | 0.16          |
| Shields et al., 2020                      | 2.20        | 0.37        | 10.86       | 0.05          |
| Smith et al., 2020                        | 1.79        | 1.14        | 2.80        | 1.27          |
| Soleimani et al., 2020                    | 1.7         | 0.95        | 3.04        | 0.95          |
| Tu et al., 2020                           | 8.89        | 1.36        | 58.08       | 0.00          |
| Turgutalp et al., 2021                    | 1.36        | 0.87        | 2.13        | 1.69          |
| Venturini et al., 2021                    | 3.00        | 1.19        | 7.54        | 0.14          |
| Vrillon et al., 2021                      | 1.62        | 0.7         | 3.78        | 0.53          |
| Wang et al., 2020                         | 7.97        | 2.29        | 27.75       | 0.01          |
| Wang et al., 2020                         | 3.60        | 1.9         | 6.82        | 0.23          |
| Wang Junhong et al., 2020                 | 0.67        | 0.15        | 3.04        | 0.59          |
| Webb et al., 2020                         | 0.65        | 0.15        | 2.71        | 0.71          |
| Wei et al.,2020                           | 3.29        | 1.66        | 6.54        | 0.24          |
| Xu Jingyuan et al., 2020                  | 0.35        | 0.18        | 0.68        | 2.68          |
| Xu Jiqian et al., 2020                    | 0.93        | 0.45        | 1.93        | 1.44          |
| Xu Peng et al., 2020                      | 18.26       | 7.90        | 42.18       | 0.01          |
| Y.Wang et al., 2020                       | 1.14        | 0.48        | 2.71        | 0.87          |
| Yan et al., 2020                          | 6.75        | 2.25        | 20.16       | 0.02          |
| Yang C. et al., 2021                      | 3.33        | 0.86        | 12.86       | 0.04          |
| Yang K. et al., 2020                      | 2.00        | 0.65        | 6.12        | 0.19          |
| Yao et al., 2021                          | 2.67        | 0.89        | 7.99        | 0.12          |
| Yildirim et al., 2021                     | 0.29        | 0.00        | 164.88      | 0.00          |
| Zhao Y. et al., 2020                      | 4.45        | 2.25        | 8.79        | 0.14          |
| Zhong Y. et al., 2020                     | 2.03        | 0.45        | 9.08        | 0.08          |
| Zhou S. et al., 2020                      | 3.58        | 1.52        | 8.44        | 0.12          |
| Zhu Y. et al., 2021                       | 1.51        | 0.96        | 2.40        | 1.49          |
| Zou X. et al., 2020                       | 10.27       | 3.54        | 29.79       | 0.01          |
| <b>Total (I squared=80.2%, p&lt;0.01)</b> | <b>1.63</b> | <b>1.51</b> | <b>1.75</b> | <b>100.00</b> |
