# Supplementary material for: Heterogeneity and Risk of Bias in Studies Examining Risk Factors for Severe Illness and Death in COVID-19: A Systematic Review and Meta-Analysis
Source: MDPI journal article supplement (doi:10.3390/pathogens11050563), 2022-05-10
Supplement: s1 [file s1]

# **Heterogeneity and risk of bias in studies examining risk factors for severe illness and death in COVID-19: a systematic review and meta-analysis**

Abraham Degarege \*, Zaeema Naveed, Josiane Kabayundo, David Brett-Major

**Table S11: Forest plot showing the relationship of cancer with the odds of death among COVID-19 patients**

| <b>Author, year</b>          | <b>OR</b> | <b>LCI</b> | <b>UCI</b> | <b>% Weight</b> |
|------------------------------|-----------|------------|------------|-----------------|
| Acar et al., 2020            | 11.96     | 6.34       | 22.54      | 0.07            |
| Akhtar et al., 2021          | 1.92      | 1.04       | 3.55       | 1.56            |
| Alberici et al., 2020        | 1.5       | 0.36       | 5.4        | 0.58            |
| Anaklı et al., 2021          | 2.64      | 0.8        | 8.69       | 0.26            |
| Aoun et al., 2021            | 1.81      | 0.68       | 4.76       | 0.82            |
| Attauabi et al., 2021        | 3.18      | 0.8        | 12.78      | 0.12            |
| Azar et al., 2020            | 5.18      | 2.44       | 11         | 0.23            |
| Bernard et al., 2021         | 2.7       | 2.5        | 2.8        | 3.40            |
| Bhatt et al., 2021           | 1.33      | 1.02       | 1.74       | 3.14            |
| Bottio et al., 2021          | 1.67      | 0.25       | 11.26      | 0.14            |
| Brandão et al., 2021         | 2.96      | 1.53       | 5.73       | 0.78            |
| Cai et al., 2021             | 1.93      | 0.49       | 7.49       | 0.33            |
| Caillard et al., 2020        | 0.85      | 0.41       | 1.81       | 2.50            |
| Capdevila-Reniu et al., 2021 | 2.01      | 0.79       | 5.08       | 0.76            |
| Castelnuovo et al., 2020     | 2.46      | 1.96       | 3.1        | 2.76            |
| Catteau et al., 2020         | 1.08      | 0.8        | 1.46       | 3.19            |
| Chand et al., 2020           | 2.49      | 0.86       | 7.17       | 0.40            |
| Chang et al., 2020           | 2.18      | 0.54       | 8.76       | 0.25            |
| Chen et al., 2021            | 3.17      | 1.84       | 5.46       | 0.98            |
| Ciceri et al., 2020          | 3.62      | 1.51       | 8.63       | 0.32            |
| Covino et al., 2020          | 1         | 0.08       | 11.64      | 0.13            |
| Covino et al., 2020          | 2.05      | 0.43       | 9.72       | 0.20            |
| Covino et al., 2021          | 1         | 0.27       | 3.71       | 1.05            |
| De Souza et al., 2021        | 3.49      | 0.99       | 12.23      | 0.14            |
| Deeb et al., 2021            | 5.06      | 1.86       | 13.79      | 0.12            |
| Deng et al., 2020            | 2.54      | 1.11       | 5.81       | 0.65            |
| Du et al., 2020              | 2.58      | 0.25       | 26.04      | 0.03            |
| Du et al., 2020              | 1.44      | 0.37       | 5.61       | 0.55            |
| Elhadi et al., 2021          | 3.41      | 0.97       | 11.92      | 0.14            |
| Escosteguy et al., 2021      | 2.58      | 1.48       | 4.52       | 1.24            |
| Falcone et al., 2020         | 1.38      | 0.67       | 2.84       | 1.81            |
| Fava et al., 2020            | 5.28      | 1.17       | 23.85      | 0.03            |
| Ferrando et al., 2020        | 1.86      | 0.36       | 9.67       | 0.19            |
| Galiero et al., 2020         | 2.62      | 1.21       | 5.68       | 0.71            |
| Genet et al., 2020           | 1.59      | 0.76       | 3.34       | 1.51            |
| Goodall et al., 2020         | 1.75      | 0.97       | 3.14       | 1.81            |
| Grasselli et al., 2020       | 1.75      | 1.39       | 2.21       | 3.06            |
| Guan et al., 2020            | 5.4       | 1.53       | 18.99      | 0.06            |
| Hwang et al., 2020           | 2.62      | 0.64       | 10.64      | 0.17            |
| Imam Z et al., 2020          | 1.84      | 1.09       | 3.11       | 1.93            |
| Incerti et al., 2021         | 1.78      | 1.58       | 2.02       | 3.33            |

|                           |      |      |       |      |
|---------------------------|------|------|-------|------|
| Inciardi et al., 2020     | 2.72 | 0.75 | 9.82  | 0.20 |
| Kim E et al., 2021        | 2.16 | 0.57 | 8.13  | 0.29 |
| Kim S et al., 2020        | 4.06 | 1.35 | 10.98 | 0.18 |
| Krause et al., 2020       | 5.75 | 1.16 | 28.44 | 0.02 |
| Li et al., 2021           | 1.28 | 0.51 | 3.16  | 1.46 |
| Liu et al., 2020          | 1.89 | 0.38 | 9.51  | 0.20 |
| Lunski et al., 2021       | 2.03 | 1.44 | 2.87  | 2.48 |
| Maguire et al., 2020      | 1.69 | 0.41 | 7.02  | 0.37 |
| Martins et al., 2021      | 7.6  | 1.75 | 32.93 | 0.02 |
| Mash et al., 2020         | 7.45 | 1.87 | 29.89 | 0.02 |
| Mayer et al., 2021        | 1.19 | 0.99 | 1.43  | 3.33 |
| Mehta et al., 2021        | 1.2  | 1.14 | 1.26  | 3.45 |
| Menager et al., 2021      | 4.35 | 1    | 18.98 | 0.05 |
| Molinero et al., 2020     | 4.36 | 0.45 | 42.37 | 0.01 |
| Molinero et al., 2020     | 1.41 | 0.49 | 3.49  | 1.26 |
| Nachega et al., 2020      | 5.11 | 0.84 | 30.97 | 0.02 |
| Nachtigall et al., 2020   | 2.36 | 1.49 | 3.74  | 1.75 |
| Nepogodiev et al., 2020   | 0.91 | 0.63 | 1.32  | 3.16 |
| Ng et al., 2020           | 1.3  | 1.07 | 1.57  | 3.30 |
| Okoh et al., 2020         | 2.72 | 1.11 | 6.65  | 0.50 |
| Otero et al., 2021        | 0.24 | 0.02 | 2.02  | 1.95 |
| Ozturk et al., 2020       | 1.57 | 0.81 | 3.04  | 1.76 |
| Park et al., 2020         | 2.12 | 0.94 | 4.76  | 0.90 |
| Patel et al., 2020        | 1.36 | 0.71 | 2.58  | 2.06 |
| Ramos-Rincon et al., 2020 | 1.21 | 0.97 | 1.51  | 3.27 |
| Rosenthal et al., 2020    | 1.27 | 1.09 | 1.47  | 3.36 |
| Rossi et al., 2020        | 1.4  | 0.77 | 2.54  | 2.15 |
| Ruthrich et al., 2021     | 0.56 | 0.44 | 0.72  | 3.40 |
| Sai et al., 2021          | 1.49 | 0.22 | 9.99  | 0.18 |
| Smith et al., 2020        | 1.93 | 1.06 | 3.53  | 1.58 |
| Stefan et al., 2020       | 4.14 | 0.22 | 74.7  | 0.00 |
| Talavera et al., 2020     | 1.4  | 0.76 | 2.56  | 2.12 |
| Tian et al., 2020         | 2.04 | 1.34 | 3.13  | 2.13 |
| Turgutalp et al., 2021    | 1.29 | 0.51 | 3.26  | 1.40 |
| Vrillon et al., 2021      | 0.29 | 0.04 | 2.35  | 1.70 |
| Wang et al., 2020         | 1.05 | 0.28 | 3.85  | 1.00 |
| Xu Jingyuan. et al., 2020 | 0.38 | 0.09 | 1.55  | 2.45 |
| Xu Jiqian et al., 2020    | 3.64 | 0.79 | 16.81 | 0.07 |
| Xu Peng et al., 2020      | 2.54 | 0.31 | 20.95 | 0.04 |
| Yarza et al., 2020        | 2.35 | 0.58 | 9.51  | 0.21 |
| Yildirim et al., 2021     | 0.14 | 0    | 4.46  | 0.71 |
| Zhao Y et al., 2020       | 3.23 | 1.39 | 7.52  | 0.42 |
| Zhou Wei et al., 2021     | 0.82 | 0.24 | 2.8   | 1.52 |
| Zhu Y et al., 2021        | 1.51 | 0.66 | 3.46  | 1.37 |
| Zou X et al., 2020        | 0.48 | 0.05 | 4.41  | 0.74 |

|                                           |             |             |             |               |
|-------------------------------------------|-------------|-------------|-------------|---------------|
| <b>Total (I squared=85.1%, p&lt;0.01)</b> | <b>1.55</b> | <b>1.34</b> | <b>1.76</b> | <b>100.00</b> |
|-------------------------------------------|-------------|-------------|-------------|---------------|
