# Supplementary material for: Heterogeneity and Risk of Bias in Studies Examining Risk Factors for Severe Illness and Death in COVID-19: A Systematic Review and Meta-Analysis
Source: MDPI journal article supplement (doi:10.3390/pathogens11050563), 2022-05-10
Supplement: s1 [file s1]

# **Heterogeneity and risk of bias in studies examining risk factors for severe illness and death in COVID-19: a systematic review and meta-analysis**

Abraham Degarege<sup>\*</sup>, Zaeema Naveed, Josiane Kabayundo, David Brett-Major

Table S3: Characteristics of the studies

| References<br>(Study area)    | Age in<br>years                 | Sample size | Study<br>design | Outcomes ( 95% CI)                                                                                                                                 |                                                                                                                                                                                 |                                                                                                                                                                                                                                                                                                                                                                                                                                       |
|-------------------------------|---------------------------------|-------------|-----------------|----------------------------------------------------------------------------------------------------------------------------------------------------|---------------------------------------------------------------------------------------------------------------------------------------------------------------------------------|---------------------------------------------------------------------------------------------------------------------------------------------------------------------------------------------------------------------------------------------------------------------------------------------------------------------------------------------------------------------------------------------------------------------------------------|
|                               |                                 |             |                 | Death vs survival                                                                                                                                  | Severe illness vs mild/moderate                                                                                                                                                 | Admission in ICU vs not in ICU                                                                                                                                                                                                                                                                                                                                                                                                        |
| Aggarwal et al. 2020<br>(USA) | 38-95<br>mean=65.5<br>median=67 | 16          | CS              |                                                                                                                                                    |                                                                                                                                                                                 | <ul style="list-style-type: none"> <li>Male 0.23, 0.02 – 3.01</li> <li>Obese 2.77, 0.37 – 21.02</li> <li>Hypertension 0.2, 0.02 – 1.71</li> <li>Diabetic 0.55, 0.06 – 4.75</li> <li>Coronary artery 2.33, 0.16-32.58</li> <li>Cerebrovascular 1, 0.05 – 19.36</li> <li>Congestive cardiac failure 4.2, 0.33 – 53.12</li> <li>Chronic kidney 5, 0.58-42.79</li> <li>COPD 1, 0.05 – 19.36</li> <li>Cancer 2.33, 0.16 – 32.58</li> </ul> |
| Al-Rousan, 2020 (South Korea) | Not provided                    | 2765        | CS              | <ul style="list-style-type: none"> <li>Males 1.14, 0.97 – 1.35</li> </ul>                                                                          |                                                                                                                                                                                 |                                                                                                                                                                                                                                                                                                                                                                                                                                       |
| Bezzio et al. 2020 (Italy)    |                                 | 79          | P               | <ul style="list-style-type: none"> <li>Age&gt;65 19.6, 2.95 – 130.6</li> <li>Charlson comorbidity index (CCI) &gt;1 16.66, 1.80 – 153.9</li> </ul> | <ul style="list-style-type: none"> <li>Age&gt;65 5.87, 1.15 – 29.66</li> <li>Carlson comorbidity index CCI&gt;1 2.9 1.06 – 9.21</li> </ul>                                      |                                                                                                                                                                                                                                                                                                                                                                                                                                       |
| Bi et al. 2020 (china)        | Mean 45                         | 391         | R               |                                                                                                                                                    | <ul style="list-style-type: none"> <li>Male 2.5, 1.1-6.1</li> </ul>                                                                                                             |                                                                                                                                                                                                                                                                                                                                                                                                                                       |
| Bi et al. 2020 (China)        | Median 46                       | 113         | R               |                                                                                                                                                    | <ul style="list-style-type: none"> <li>Age&gt;50 5.42, 1.92 15.26</li> <li>Male 1.13, 0.44-2.91</li> <li>Smoker 8.6, 1.88-39.55</li> <li>Comorbidity 2.21, 0.86-5.68</li> </ul> |                                                                                                                                                                                                                                                                                                                                                                                                                                       |
| MMWR, 2020<br>(APRIL3, USA)   | All ages                        | 6637        | CS              |                                                                                                                                                    |                                                                                                                                                                                 | <ul style="list-style-type: none"> <li>Diabetes 1.49, 1.17-1.91</li> <li>Chronic lung disease 1.50,1.13-2.00</li> <li>Cardiovascular disease 1.33,1.04-1.71</li> <li>Immunosuppression 1.52, 1.01-2.29</li> <li>Chronic renal disease 1.38,0.97-1.96</li> <li>Pregnancy 0.28, 0.10-0.81</li> <li>Chronic liver disease 1.77, 0.65-4.80</li> </ul>                                                                                     |

|                                 |                            |        |    |                                                                                                                                                                                                                                                                                                                              |                                                                                                                                                                                                                                                                                                                                                                                                                                                                                   |                                                                                                                            |
|---------------------------------|----------------------------|--------|----|------------------------------------------------------------------------------------------------------------------------------------------------------------------------------------------------------------------------------------------------------------------------------------------------------------------------------|-----------------------------------------------------------------------------------------------------------------------------------------------------------------------------------------------------------------------------------------------------------------------------------------------------------------------------------------------------------------------------------------------------------------------------------------------------------------------------------|----------------------------------------------------------------------------------------------------------------------------|
|                                 |                            |        |    |                                                                                                                                                                                                                                                                                                                              |                                                                                                                                                                                                                                                                                                                                                                                                                                                                                   | <ul style="list-style-type: none"> <li>○ Other comorbidities 1.11, 0.88-1.40</li> <li>○ Smoking 0.51, 0.19-1.35</li> </ul> |
| MMWR,2020<br>(APRIL14, USA)     | All ages                   | 8945   | CS | ○ Age>65 9.94, 4.53-21.8                                                                                                                                                                                                                                                                                                     |                                                                                                                                                                                                                                                                                                                                                                                                                                                                                   | ○ Age>65 1.81, 1.14-2.84                                                                                                   |
| Chen Q et al. 2020a<br>(China)  | Mean=47.5<br>Sd= 14.6      | 145    | R  |                                                                                                                                                                                                                                                                                                                              | <ul style="list-style-type: none"> <li>○ Continuous age <ul style="list-style-type: none"> <li>○ Median severely ill (52.8 year)</li> <li>○ Median non-severely ill (45.3)</li> <li>○ P value=0.0001</li> </ul> </li> <li>○ Males 0.99, 0.46-1.93</li> <li>○ Hypertension, 1.81, 0.71-4.62</li> <li>○ Diabetes 2.63, 0.86-8.05</li> <li>○ Chronic liver disease 5.12, 0.90-29.14</li> <li>○ Chronic kidney disease 1.19, 0.11-13.48</li> <li>○ Smoking 0.59, 0.15-2.10</li> </ul> |                                                                                                                            |
| Colaneri et al. 2020<br>(Italy) | Median=67.5<br>Range 10-94 | 44     | R  |                                                                                                                                                                                                                                                                                                                              | <ul style="list-style-type: none"> <li>○ Male 2.6, 0.67-10.06</li> <li>○ Age&gt;65 4.06, 1.04-15.72</li> <li>○ Other comorbidities 2.6, 0.67-10.06</li> <li>○ Cancer 3.8, 0.62-23.85</li> <li>○ Heart disease 2.4, 0.59-9.63</li> <li>○ Hypertension 0.70, 0.19-2.61</li> <li>○ Diabetes 0.21, 0.02-2.00</li> </ul>                                                                                                                                                               |                                                                                                                            |
| Deng G et al., 2020<br>(China)  |                            | 44,672 | CS | <ul style="list-style-type: none"> <li>○ Males 1.6, 1.48-1.92</li> <li>○ Age&gt;=60 9.98, 8.53-11.69</li> <li>○ Hypertension 2.87,2.39-3.45</li> <li>○ Diabetes 3.54, 2.71-4.48</li> <li>○ Cardiovascular disease 5.00 3.96-6.31</li> <li>○ Respiratory disease 2.58, 1.78-3.72</li> <li>○ Cancer 2.23, 0.97-5.11</li> </ul> |                                                                                                                                                                                                                                                                                                                                                                                                                                                                                   |                                                                                                                            |
| Deng Q et al, 2020<br>(China)   | Median 65<br>Range 24-92   | 112    | R  |                                                                                                                                                                                                                                                                                                                              | <ul style="list-style-type: none"> <li>○ Continuous age <ul style="list-style-type: none"> <li>○ Severe median=68</li> <li>○ Non-severe median=56</li> <li>○ P value &lt;0.01</li> </ul> </li> <li>○ Male 1.79 0.83-3.84</li> <li>○ COPD 2.06 0.21-20.48</li> <li>○ Hypertension 1.53, 0.67-3.51</li> <li>○ Diabetes 2.11, 0.70-6.35</li> <li>○ Cardiovascular disease</li> </ul>                                                                                                 |                                                                                                                            |

|                                           |                                          |       |    |                                                                                                                                                                                                                                                                                                                                   |                                                                                                                                                                                                                                                                                                                                                                                                                                                                                                                                       |  |
|-------------------------------------------|------------------------------------------|-------|----|-----------------------------------------------------------------------------------------------------------------------------------------------------------------------------------------------------------------------------------------------------------------------------------------------------------------------------------|---------------------------------------------------------------------------------------------------------------------------------------------------------------------------------------------------------------------------------------------------------------------------------------------------------------------------------------------------------------------------------------------------------------------------------------------------------------------------------------------------------------------------------------|--|
|                                           |                                          |       |    |                                                                                                                                                                                                                                                                                                                                   | 1.73,0.51-5.81                                                                                                                                                                                                                                                                                                                                                                                                                                                                                                                        |  |
| Du et al. 2020<br>(China)                 | Mean<br>57.6 ±<br>13.7<br>Range<br>18-87 | 179   | P  | <ul style="list-style-type: none"> <li>○ Age ≥65 3.76, 1.14-17.39</li> <li>○ Cardiovascular disease 2.46, 0.75 – 8.04</li> <li>○ Hypertension 4.08,1.58-10.5</li> <li>○ Male 0.74, 0.29-1.84</li> <li>○ Diabetes 1.94, 0.69-5.45</li> <li>○ Cancer 2.58, 0.25-26.04</li> </ul>                                                    |                                                                                                                                                                                                                                                                                                                                                                                                                                                                                                                                       |  |
| Du et al., 2020a<br>(China)               | Mean<br>70.7                             | 109   | R  |                                                                                                                                                                                                                                                                                                                                   | <ul style="list-style-type: none"> <li>○ Age ≥65 0.84, 0.34-2.03</li> <li>○ Male 1.26, 0.56, 2.84</li> <li>○ Hypertension 0.80, 0.37-1.73</li> <li>○ Cardiovascular disease 0.68, 0.30-1.52</li> <li>○ Diabetes 1.43, 0.63-3.22</li> <li>○ Chronic respiratory disease 0.29, 0.08-0.97</li> </ul>                                                                                                                                                                                                                                     |  |
| Dudley et al. 2020<br>China, South Korea) |                                          | 52427 | CS | <ul style="list-style-type: none"> <li>○ Sex specific case fatality rate in china <ul style="list-style-type: none"> <li>○ Males 2.8%</li> <li>○ Females 1.7%</li> </ul> </li> <li>○ Sex specific case fatality rate in Korea <ul style="list-style-type: none"> <li>○ Males 1.19%</li> <li>○ Female 0.52%</li> </ul> </li> </ul> |                                                                                                                                                                                                                                                                                                                                                                                                                                                                                                                                       |  |
| Feng et al. 2020<br>(China)               | Median<br>53<br>IQR 40-64                | 476   | CS |                                                                                                                                                                                                                                                                                                                                   | <ul style="list-style-type: none"> <li>○ Age ≥65 2.17,1.39-3.40</li> <li>○ Male 1.60, 1.04 – 2.45</li> <li>○ Smoker 1.85, 0.97-3.53</li> <li>○ Other comorbidity 2.18, 1.37-3.47</li> <li>○ Hypertension 1.82, 1.15-2.87</li> <li>○ Cardiovascular disease 2.50,1.27-4.9</li> <li>○ Diabetes 1.58, 0.84-2.97</li> <li>○ Cancer 4.15, 1.29-13.33</li> <li>○ Cerebrovascular disease 3.36,1.28-8.92</li> <li>○ Immunosuppression 7.35, 1.40-39.40</li> <li>○ COPD 5.47, 2.23-13.39</li> <li>○ Chronic renal 2.86, 0.39-20.58</li> </ul> |  |
| Gong et al., 2020<br>(china)              | Median<br>49                             | 189   | R  |                                                                                                                                                                                                                                                                                                                                   | <ul style="list-style-type: none"> <li>○ Median age for severe 63.5</li> <li>○ Median age for non-severe 45 <ul style="list-style-type: none"> <li>○ P value &lt;0.01</li> </ul> </li> <li>○ Male 1.64, 0.73-3.70</li> </ul>                                                                                                                                                                                                                                                                                                          |  |

|                                 |                                                                                                  |      |    |                                                                                                                                                                                                                                                                                                                                                     |                                                                                                                                                                                                                                                                                                                                                                                          |                                                                                                                                                                                                                                                                                                |
|---------------------------------|--------------------------------------------------------------------------------------------------|------|----|-----------------------------------------------------------------------------------------------------------------------------------------------------------------------------------------------------------------------------------------------------------------------------------------------------------------------------------------------------|------------------------------------------------------------------------------------------------------------------------------------------------------------------------------------------------------------------------------------------------------------------------------------------------------------------------------------------------------------------------------------------|------------------------------------------------------------------------------------------------------------------------------------------------------------------------------------------------------------------------------------------------------------------------------------------------|
| Grasselli et al.2020<br>(Italy) | Median<br>63<br>IQR 56-70                                                                        | 1591 | R  | <ul style="list-style-type: none"> <li>○ Age &gt;60 3.29, 2.52-4.30</li> <li>○ Hypertension 2.24,1.70-2.95</li> </ul>                                                                                                                                                                                                                               |                                                                                                                                                                                                                                                                                                                                                                                          |                                                                                                                                                                                                                                                                                                |
| Guan et al., 2020a<br>(China)   | Mean<br>48.9                                                                                     | 1590 | CS | <ul style="list-style-type: none"> <li>○ COPD 11.53, 4.36-30.45</li> <li>○ Diabetes 4.27, 2.20-8.26</li> <li>○ Hypertension 6.86, 3.85-12.19</li> <li>○ Cardiovascular disease 5.56, 2.48-12.45</li> <li>○ Cerebrovascular disease 8.61, 3.35-22.12</li> <li>○ Cancer 5.40, 1.53-18.99</li> <li>○ Chronic renal disease10.58, 3.71-30.15</li> </ul> | <ul style="list-style-type: none"> <li>○ COPD 9.25, 4.00-21.38</li> <li>○ Diabetes 3.16, 2.14-4.67</li> <li>○ Hypertension 3.38, 2.50-4.57</li> <li>○ Cardiovascular disease 2.84,1.62-4.96</li> <li>○ Cerebrovascular disease 5.52, 2.66-11.45</li> <li>○ Cancer 5.41, 2.12-13.78</li> <li>○ Chronic renal disease3.30, 1.35-8.00</li> <li>○ Immunodeficiency 2.630.23-29.18</li> </ul> | <ul style="list-style-type: none"> <li>○ COPD 6.59, 2.66-16.30</li> <li>○ Diabetes 2.95, 1.72-5.04</li> <li>○ Hypertension 3.39, 2.21-5.21</li> <li>○ Cardiovascular disease 2.48, 1.14-5.38</li> <li>○ Cerebrovascular disease 4.85, 2.03-11.61</li> <li>○ Cancer 6.04, 2.11-17.32</li> </ul> |
| Guan et al, 2020b<br>(China)    | Median<br>47                                                                                     | 1099 | R  |                                                                                                                                                                                                                                                                                                                                                     | <ul style="list-style-type: none"> <li>○ Age &gt;=65 2.55, 1.72-3.79</li> <li>○ Male 0.97, 0.70-1.36</li> <li>○ Smoking 1.87, 1.24-2.81</li> </ul>                                                                                                                                                                                                                                       |                                                                                                                                                                                                                                                                                                |
| Guo et al., 2020<br>(China)     | Median<br>59                                                                                     | 24   | R  | ○Diabetes 3.2, 0.81-12.58                                                                                                                                                                                                                                                                                                                           |                                                                                                                                                                                                                                                                                                                                                                                          |                                                                                                                                                                                                                                                                                                |
| Han et al., 2020<br>(China)     | Median:<br>58.95<br>±10.80<br>Severe cases:<br>58.97 ± 14.38<br>Critical Cases:<br>57.27 ± 17.25 | 273  | R  |                                                                                                                                                                                                                                                                                                                                                     | ○ Male 0.94, 0.54-1.65                                                                                                                                                                                                                                                                                                                                                                   |                                                                                                                                                                                                                                                                                                |
| Hu L et al., 2020<br>(China)    | Median<br>61                                                                                     | 323  | R  |                                                                                                                                                                                                                                                                                                                                                     | <ul style="list-style-type: none"> <li>○ Age&gt;=65 2.96, 1.81-4.83</li> <li>○ Male 1.13, 0.73-1.76</li> <li>○ Smoking 2.06, 1.0-4.2</li> <li>○ Hypertension 1.78, 1.11-2.88</li> <li>○ Diabetes 2.32, 1.19-4.53</li> </ul>                                                                                                                                                              |                                                                                                                                                                                                                                                                                                |

|                                    |                           |      |    |                                                                                                                    |                                                                                                                                                                                                                                                                                                                               |                                                                                                                                                                                                                                                                                                                                                                          |
|------------------------------------|---------------------------|------|----|--------------------------------------------------------------------------------------------------------------------|-------------------------------------------------------------------------------------------------------------------------------------------------------------------------------------------------------------------------------------------------------------------------------------------------------------------------------|--------------------------------------------------------------------------------------------------------------------------------------------------------------------------------------------------------------------------------------------------------------------------------------------------------------------------------------------------------------------------|
| Ji D et al., 2020 (China)          | Mean 44<br>±16.3          | 208  | R  |                                                                                                                    | <ul style="list-style-type: none"> <li>○ Age <ul style="list-style-type: none"> <li>○ Severe mean 57.7</li> <li>○ Non-severe mean 40.7</li> <li>○ P value &lt;0.001</li> </ul> </li> <li>○ Age (category)&gt;65 9.75, 4.20-22.63</li> <li>○ Male 2.07, 0.98-4.34</li> <li>○ Smoking 2.10, 0.74-5.92</li> </ul>                |                                                                                                                                                                                                                                                                                                                                                                          |
| Kalligeros et al., 2020<br>(China) | Median<br>60              | 103  | R  |                                                                                                                    |                                                                                                                                                                                                                                                                                                                               | <ul style="list-style-type: none"> <li>○ Continuous age 1.03, 1.0-1.07</li> <li>○ Non-Hispanic black 0.80, 0.26-2.45</li> <li>○ Male 2.40, 0.87-6.64</li> <li>○ Obesity 5.39,1.13-25.64</li> <li>○ Diabetes 1.91, 0.71-5.19</li> <li>○ Hypertension 0.79, 0.27-2.28</li> <li>○ Lung disease 1.50, 0.47-4.82</li> <li>○ Cardiovascular disease 1.52, 0.47-4.82</li> </ul> |
| Lei et al., 2020<br>(China)        | Median<br>56              | 5771 | CS |                                                                                                                    | <ul style="list-style-type: none"> <li>○ Age continuous <ul style="list-style-type: none"> <li>○ Severe median 59</li> <li>○ Non-severe median 55</li> <li>○ P value &lt;0.001</li> </ul> </li> <li>○ Male 0.67, 0.59-0.76</li> <li>○ Chronic liver disease 1.74, 1.08-2.80</li> </ul>                                        |                                                                                                                                                                                                                                                                                                                                                                          |
| Leung et al., 20202<br>(China)     |                           | 154  | CS | <ul style="list-style-type: none"> <li>○ Age continuous 1.04, 1.00-1.10</li> <li>○ Male 1.19, 0.62-2.26</li> </ul> |                                                                                                                                                                                                                                                                                                                               |                                                                                                                                                                                                                                                                                                                                                                          |
| Li K et al., 2020 (China)          |                           | 83   | CS |                                                                                                                    | <ul style="list-style-type: none"> <li>○ Age continuous</li> <li>○ Severe mean age 25</li> <li>○ Non severe mean age 41.9 <ul style="list-style-type: none"> <li>○ P value &lt;0.001</li> </ul> </li> <li>○ Male 1.5, 0.57-3.88</li> <li>○ Hypertension 1.59, 0.24-10.18</li> </ul>                                           |                                                                                                                                                                                                                                                                                                                                                                          |
| Li X et al., 2020<br>China)        | Median<br>60<br>IQR 48-69 | 548  | R  |                                                                                                                    | <ul style="list-style-type: none"> <li>○ Age&gt;=65 2.24, 1.94-2.78</li> <li>○ Male 1.60, 1.14-2.24</li> <li>○ Smoking 1.38, 0.88-2.17</li> <li>○ Chronic lung disease 3.49, 1.12-10.8</li> <li>○ Diabetes 1.91,1.18-3.1</li> <li>○ Hypertension 2.20, 1.51-3.20</li> <li>○ Chronic kidney disease 1.56, 0.43-5.60</li> </ul> |                                                                                                                                                                                                                                                                                                                                                                          |
| Lian et al., 2020 (China)          |                           | 788  | R  |                                                                                                                    | <ul style="list-style-type: none"> <li>○ Age&gt;=60 4.60, 2.80-7.55</li> </ul>                                                                                                                                                                                                                                                | <ul style="list-style-type: none"> <li>○ Age&gt;=60 7.55, 3.15-18.05</li> </ul>                                                                                                                                                                                                                                                                                          |

|                                          |                          |       |    |                                                                                                                                                                                                                                                                                                                                                      |                                                                                                                                                                                                                                                                                                  |                                                                                                                                                                                                                                                                         |
|------------------------------------------|--------------------------|-------|----|------------------------------------------------------------------------------------------------------------------------------------------------------------------------------------------------------------------------------------------------------------------------------------------------------------------------------------------------------|--------------------------------------------------------------------------------------------------------------------------------------------------------------------------------------------------------------------------------------------------------------------------------------------------|-------------------------------------------------------------------------------------------------------------------------------------------------------------------------------------------------------------------------------------------------------------------------|
| Liu Y et al., 2020<br>(China)            | Mean<br>53.95<br>(16.90) | 245   | R  | <ul style="list-style-type: none"> <li>○ Age continuous 1.09, 1.06-1.13</li> <li>○ chronic lung disease 4.14, 0.94-18.22</li> <li>○ Hypertension 3.94, 1.82-8.53</li> <li>○ Diabetes 3.30, 1.24-8.77</li> <li>○ Cancer 1.89, 0.38-9.51</li> <li>○ Chronic liver disease 2.67, 0.50-14.37</li> <li>○ Smoking 2.93, 0.72-11.94</li> </ul>              |                                                                                                                                                                                                                                                                                                  |                                                                                                                                                                                                                                                                         |
| Mehta et al., 2020<br>(USA)              | Median<br>69             | 218   | CS | <ul style="list-style-type: none"> <li>○ Males 1.04, 0.57-1.90</li> <li>○ Age <ul style="list-style-type: none"> <li>○ Survived median 66</li> <li>○ Died median 76</li> </ul> </li> </ul>                                                                                                                                                           |                                                                                                                                                                                                                                                                                                  |                                                                                                                                                                                                                                                                         |
| Middeldrop et al., 2020<br>(Netherlands) | Mean 61<br>± 14          | 198   | R  |                                                                                                                                                                                                                                                                                                                                                      |                                                                                                                                                                                                                                                                                                  | <ul style="list-style-type: none"> <li>○ Age <ul style="list-style-type: none"> <li>○ Mean for intensive care=62</li> <li>○ Mean for non-intensive= 60</li> <li>○ P value 0.28</li> </ul> </li> <li>○ Male 2.41, 1.26-4.62</li> <li>○ Cancer 1.23, 0.26-5.69</li> </ul> |
| Nikpouraghdam et al., 2020 (Iran)        | Mean<br>55.5 ±<br>15.15  | 2968  | R  | <ul style="list-style-type: none"> <li>○ Age ≥ 60 3.95, 2.98-5.23</li> <li>○ Male 1.45, 1.08 - 1.96</li> <li>○ Diabetes 1.35, 0.71-2.55</li> <li>○ Chronic respiratory disease 2.23, 1.08-4.59</li> <li>○ Hypertension 1.97, 0.92-4.21</li> <li>○ Cardiovascular disease 1.51, 0.53-4.30</li> <li>○ Chronic renal disease 2.49, 0.71-8.69</li> </ul> |                                                                                                                                                                                                                                                                                                  |                                                                                                                                                                                                                                                                         |
| Pei et al., 2020<br>(China)              | Mean<br>56.3             | 333   | CS |                                                                                                                                                                                                                                                                                                                                                      | <ul style="list-style-type: none"> <li>○ Male 1.78, 1.15-2.76</li> <li>○ Hypertension 1.70, 1.05-2.73</li> <li>○ Diabetes 2.61, 1.48-4.59</li> </ul>                                                                                                                                             |                                                                                                                                                                                                                                                                         |
| Pereira et al., 2020<br>(USA)            | Median<br>57             | 90    | R  |                                                                                                                                                                                                                                                                                                                                                      | <ul style="list-style-type: none"> <li>○ Age &gt;60 1.02, 0.40-2.55</li> <li>○ Hispanic 0.68, 0.27-1.68</li> <li>○ Hypertension 1.66, 0.64-4.38</li> <li>○ Diabetes 1.43, 0.58-3.54</li> <li>○ Chronic Lung disease 1.35, 0.44-4.12</li> <li>○ Chronic kidney disease 1.56, 0.59-4.11</li> </ul> |                                                                                                                                                                                                                                                                         |
| MMWR, 2020 (USA)                         |                          | 7,162 | CS |                                                                                                                                                                                                                                                                                                                                                      |                                                                                                                                                                                                                                                                                                  | <ul style="list-style-type: none"> <li>○ Age ≥ 65 1.20, 0.95-1.51</li> </ul>                                                                                                                                                                                            |

|                                   |                               |      |    |                                                                                                                          |                                                                                                                                                                                                                                                                                                                                                                                                                                                                |                                                                                                                                                                                                                  |
|-----------------------------------|-------------------------------|------|----|--------------------------------------------------------------------------------------------------------------------------|----------------------------------------------------------------------------------------------------------------------------------------------------------------------------------------------------------------------------------------------------------------------------------------------------------------------------------------------------------------------------------------------------------------------------------------------------------------|------------------------------------------------------------------------------------------------------------------------------------------------------------------------------------------------------------------|
| Qin C et al., 2020<br>(China)     | Median<br>58                  | 452  | R  |                                                                                                                          | <ul style="list-style-type: none"> <li>Male 1.27, 0.86-1.86</li> <li>Smoking 0.42, 0.09-1.94</li> <li>Chronic lung disease 1.76, 0.47-6.61</li> <li>Hypertension 2.62, 1.65-4.17</li> <li>Cardiovascular disease 4.97, 1.47-19.79</li> <li>Cerebrovascular disease 1.56, 0.40-5.97</li> <li>Chronic liver disease 0.57, 0.11-2.88</li> <li>Diabetes 1.48, 0.86-2.55</li> <li>Cancer 1.46, 0.45-4.75</li> <li>Chronic kidney disease 0.86, 0.24-3.12</li> </ul> |                                                                                                                                                                                                                  |
| Qu et al., 2020<br>(China)        | Median<br>20.5                | 30   | CS |                                                                                                                          | <ul style="list-style-type: none"> <li>Age continuous <ul style="list-style-type: none"> <li>Median age severe=60</li> <li>Median age non-severe 49.44</li> <li>P value 0.041</li> </ul> </li> </ul>                                                                                                                                                                                                                                                           |                                                                                                                                                                                                                  |
| Richardson et al., 2020<br>(USA)  | Median<br>age 63<br>IQR 52-75 | 5700 | CS | <ul style="list-style-type: none"> <li>Age <math>\geq 60</math> 4.14, 3.27-5.24</li> <li>Male 1.23, 1.01-1.49</li> </ul> |                                                                                                                                                                                                                                                                                                                                                                                                                                                                |                                                                                                                                                                                                                  |
| Simonnet et al., 2020<br>(France) | Median<br>60<br>IQR 51-70     | 124  | R  |                                                                                                                          |                                                                                                                                                                                                                                                                                                                                                                                                                                                                | <ul style="list-style-type: none"> <li>Age continuous 1.00, 0.97-1.04</li> <li>Male 2.83, 1.02-7.85</li> <li>Diabetes 1.60, 0.44-6.83</li> <li>Hypertension 2.29, 0.89-5.84</li> </ul>                           |
| Sun L et al., 2020<br>(China)     | Median<br>44<br>IQR 34-56     | 55   | CS |                                                                                                                          | <ul style="list-style-type: none"> <li>Age <math>&gt;65</math> 21.71, 3.78-124.54</li> <li>Male 0.84, 0.25-2.78</li> <li>Hypertension 12.6, 2.18-73.4</li> <li>Diabetes 1.89, 0.28-12.65</li> </ul>                                                                                                                                                                                                                                                            |                                                                                                                                                                                                                  |
| Sun S et al., 2020<br>(China)     | Median<br>50<br>IQR 41-57     | 116  | R  |                                                                                                                          | <ul style="list-style-type: none"> <li>Age continuous <ul style="list-style-type: none"> <li>Median non-severe 47</li> <li>Median severe 62</li> <li>P value <math>&lt;0.001</math></li> </ul> </li> <li>Male 2.23, 0.90-5.51</li> </ul>                                                                                                                                                                                                                       | <ul style="list-style-type: none"> <li>Age continuous <ul style="list-style-type: none"> <li>Median non-severe 57</li> <li>Median 71</li> <li>P value 0.008</li> </ul> </li> <li>Male 1.00, 0.18-5.45</li> </ul> |



|                                   |                           |        |    |                                                                                                                                                                                                                                                                                                                                                    |                                                                                                                                                                                                                                                                                                                                                  |  |
|-----------------------------------|---------------------------|--------|----|----------------------------------------------------------------------------------------------------------------------------------------------------------------------------------------------------------------------------------------------------------------------------------------------------------------------------------------------------|--------------------------------------------------------------------------------------------------------------------------------------------------------------------------------------------------------------------------------------------------------------------------------------------------------------------------------------------------|--|
| Tang et al., 2020<br>(China)      | Mean<br>65.1<br>± 12.0    | 449    | CS | <ul style="list-style-type: none"> <li>○ Age continuous</li> <li>○ Mean survivors 63.7</li> <li>○ Mean non-survivors 68.7</li> <li>○ Pvalue= &lt;0.001</li> <li>○ Male 1.57, 1.03-2.40</li> </ul>                                                                                                                                                  |                                                                                                                                                                                                                                                                                                                                                  |  |
| Tedeschi et al., 2020<br>(Italia) |                           | 609    | R  | <ul style="list-style-type: none"> <li>○ Hypertension 4.31, 2.91-6.39</li> </ul>                                                                                                                                                                                                                                                                   |                                                                                                                                                                                                                                                                                                                                                  |  |
| Tian et al., 2020 (China)         | Median<br>47.5            | 262    | R  |                                                                                                                                                                                                                                                                                                                                                    | <ul style="list-style-type: none"> <li>○ Age ≥65 5.16, 2.55-10.45</li> <li>○ Male 1.48, 0.77-2.81</li> </ul>                                                                                                                                                                                                                                     |  |
| To et al., 2020<br>(China)        | Median<br>age 62          | 23     | R  |                                                                                                                                                                                                                                                                                                                                                    | <ul style="list-style-type: none"> <li>○ Male 1.28, 0.24-6.83</li> <li>○ Hypertension 3.66, 0.51-26.2</li> <li>○ Diabetes 1.37, 0.15-11.93</li> </ul>                                                                                                                                                                                            |  |
| Verity et al., 2020<br>(China)    |                           | 45,695 | CS | <ul style="list-style-type: none"> <li>○ Age ≥60 9.98, 8.53-11.69</li> </ul>                                                                                                                                                                                                                                                                       |                                                                                                                                                                                                                                                                                                                                                  |  |
| Wan et al., 2020 (China)          | Median<br>47              | 135    | CS |                                                                                                                                                                                                                                                                                                                                                    | <ul style="list-style-type: none"> <li>○ Age continuous <ul style="list-style-type: none"> <li>○ Median mild 44</li> <li>○ Median severe 56</li> <li>○ P value &lt;0.0001</li> </ul> </li> <li>○ Male 0.91, 0.43-1.91</li> <li>○ Smoking 1.19, 0.11-13.53</li> <li>○ Diabetes 8.90, 2.26-34.9</li> <li>○ Hypertension 1.06, 0.30-3.67</li> </ul> |  |
| Wang D et al., 2020<br>(China)    | Median<br>51<br>IQR 36-65 | 107    | R  | <ul style="list-style-type: none"> <li>○ Age ≥60 18.12, 4.79-68.57</li> <li>○ Male 6.11, 1.66-22.48</li> <li>○ Hypertension 5, 1.74-14.30</li> <li>○ Cardiovascular disease 7.97, 2.29-27.75</li> <li>○ Diabetes 4.88, 1.31-18.18</li> <li>○ Chronic liver disease 0.94, 0.10-8.57</li> <li>○ Cerebrovascular diseases 5.31, 0.98-28.71</li> </ul> |                                                                                                                                                                                                                                                                                                                                                  |  |
| Wang J et al., 2020<br>(China)    | Mean<br>52.1<br>Sd 18.07  | 93     | CS |                                                                                                                                                                                                                                                                                                                                                    | <ul style="list-style-type: none"> <li>○ Age &gt;60 6.21, 2.11-18.23</li> <li>○ Male 1.62, 0.56-4.71</li> </ul>                                                                                                                                                                                                                                  |  |

|                                |                             |     |   |                                                                                                                                                                                                                                                                                                                                                                                                                                                                                                |                                                                                                                                                                                                         |                            |
|--------------------------------|-----------------------------|-----|---|------------------------------------------------------------------------------------------------------------------------------------------------------------------------------------------------------------------------------------------------------------------------------------------------------------------------------------------------------------------------------------------------------------------------------------------------------------------------------------------------|---------------------------------------------------------------------------------------------------------------------------------------------------------------------------------------------------------|----------------------------|
| Wang L et al., 2020<br>(China) | Mean<br>71+-8               | 393 | P | <ul style="list-style-type: none"> <li>○ Age continuous</li> <li>○ Survived median 68</li> <li>○ Died median 76</li> <li>○ P value &lt;0.001</li> <li>○ Male 1.73, 1.00-3.00</li> <li>○ Hypertension 1.53, 0.89-2.64</li> <li>○ Diabetes 1.09, 0.52-2.26</li> <li>○ Cardiovascular disease 3.60, 1.90-6.82</li> <li>○ Cerebrovascular disease 4.34, 1.75-10.73</li> <li>○ Chronic kidney disease 1.93, 0.57-6.47</li> <li>○ COPD 5.37, 2.17-13.29</li> <li>○ Cancer 1.05, 0.28-3.85</li> </ul> |                                                                                                                                                                                                         |                            |
| Wei et al, 2020<br>(China)     | Mean<br>64.8 ±<br>13.3      | 252 | R |                                                                                                                                                                                                                                                                                                                                                                                                                                                                                                | <ul style="list-style-type: none"> <li>○ Male 1.73, 1.05-2.85</li> <li>○ Diabetes 1.01, 0.47-2.15</li> <li>○ Hypertension 2.10, 1.22-3.60</li> <li>○ Cardiovascular disease 3.56, 1.25-10.13</li> </ul> |                            |
| Wu J et al.,2020<br>(China)    | Mean<br>43.12<br>SD 10.02   | 280 | R |                                                                                                                                                                                                                                                                                                                                                                                                                                                                                                | <ul style="list-style-type: none"> <li>○ Age ≥65 12.75. 6.74-24.1</li> <li>○ Male 1.02, 0.60-1.70</li> </ul>                                                                                            |                            |
| Yan Y et al., 2020<br>(China)  | Median<br>64 (IQR<br>49–73) | 193 | R | <ul style="list-style-type: none"> <li>○ Age continuous</li> <li>○ Survivor median 46</li> <li>○ Non-survivor median 70</li> <li>○ P value &lt;0.01</li> <li>○ Diabetes 4.77, 2.15-10.56</li> <li>○ Male 2.93, 1.62-5.32</li> <li>○ Diabetes 2.83, 1.42-5.9.35</li> <li>○ Hypertension 4.81, 2.48-9.35</li> <li>○ Cardiovascular disease 6.75, 2.25-20.16</li> <li>○ Chronic respiratory disease 3.09, 0.83-11.48</li> </ul>                                                                   | ○ Diabetes 4.77, 2.15-10.56                                                                                                                                                                             | ○ Diabetes 2.83, 1.42-5.62 |
| Yang G et al., 2020<br>(China) |                             | 462 | R | ○ Hypertension 1.68, 0.67-4.21                                                                                                                                                                                                                                                                                                                                                                                                                                                                 | ○ Hypertension 1.13, 0.65-1.98                                                                                                                                                                          |                            |

|                                 |                             |      |    |                                                                                                                                                                       |                                                                                                                                                                                                                                                                     |  |
|---------------------------------|-----------------------------|------|----|-----------------------------------------------------------------------------------------------------------------------------------------------------------------------|---------------------------------------------------------------------------------------------------------------------------------------------------------------------------------------------------------------------------------------------------------------------|--|
| Yang R et al., 2020<br>(China)  | Median<br>55.6<br>IQR=40-67 | 212  | R  | <ul style="list-style-type: none"> <li>○ Age <math>\geq 65</math> 5.91, 2.46-14.19</li> <li>○ Male 6.16, 2.03-18.65</li> </ul>                                        |                                                                                                                                                                                                                                                                     |  |
| Yang X et al., 2020<br>(China)  | Median<br>57<br>IQR 47-67   | 1476 | CS | <ul style="list-style-type: none"> <li>○ Continuous age</li> <li>○ Non survivors mean 67</li> <li>○ Survivors mean 56</li> <li>○ Male 1.89, 1.41-2.53</li> </ul>      |                                                                                                                                                                                                                                                                     |  |
| Yao et al., 2020<br>(China)     | Median<br>52<br>IQR 37-58   | 108  | R  | <ul style="list-style-type: none"> <li>○ Age <math>&gt; 65</math> 7.72, 2.11-28.18</li> <li>○ Male 2.33, 0.68-7.9</li> <li>○ Hypertension 13.53, 3.55-51.5</li> </ul> |                                                                                                                                                                                                                                                                     |  |
| Zhang R et al., 2020<br>(China) | Mean<br>45.4<br>SD 15.6     | 120  | R  |                                                                                                                                                                       | <ul style="list-style-type: none"> <li>○ Age continuous 1.1, 1.0-1.1</li> <li>○ Male 1.52, 0.65-3.55</li> <li>○ Hypertension 10.70, 3.56-32.12</li> <li>○ Cardiovascular disease 4.3, 1.07-17.2</li> <li>○ Malignancy 8.8, 1.61-48.12</li> </ul>                    |  |
| Zou Y et al.2020<br>(China)     |                             | 303  | CS |                                                                                                                                                                       | <ul style="list-style-type: none"> <li>○ Male 3.36, 1.31-8.61</li> <li>○ Age: Mild (50 years), severe (65), <math>P = &lt; 0.001</math></li> <li>○ Chronic underlying disease 4.8, 1.95-11.82</li> <li>○ Smokers 1.84, 0.39-8.7</li> </ul>                          |  |
| Zhang J et al. 2020<br>(China)  | 38-91                       | 19   | R  | <ul style="list-style-type: none"> <li>○ Hypertension 0.72, 0.11-4.62</li> <li>○ Diabetes 0.17, 0.01-2.04</li> <li>○ Cerebrovascular disease 0.02-4.06</li> </ul>     |                                                                                                                                                                                                                                                                     |  |
| Zhang Y et al. 2020<br>(China)  | 20-86                       | 115  | R  |                                                                                                                                                                       | <ul style="list-style-type: none"> <li>○ <math>\geq 60</math> years 11.47, 4.40-29.88</li> <li>○ Male 3.45, 1.46-8.17</li> </ul>                                                                                                                                    |  |
| Zheng KI et al.2020<br>(China)  | 32-81                       | 111  | R  |                                                                                                                                                                       | <ul style="list-style-type: none"> <li>○ Male 24.8, 1.8-342.1</li> <li>○ Comorbidities 52.6, 3.6-776.4</li> <li>○ Age as a continuous <math>P &lt; 0.001</math></li> <li>○ Hypertensive 22, 6.03-80.3</li> <li>○ Cardiovascular disease 11.5, 0.98-134.4</li> </ul> |  |

|                                |                     |      |    |                                                                                                                                                                                                                                                                                          |                                                                                                                                                                                                                                                                                                                                                                                                                                                                                                                                          |  |
|--------------------------------|---------------------|------|----|------------------------------------------------------------------------------------------------------------------------------------------------------------------------------------------------------------------------------------------------------------------------------------------|------------------------------------------------------------------------------------------------------------------------------------------------------------------------------------------------------------------------------------------------------------------------------------------------------------------------------------------------------------------------------------------------------------------------------------------------------------------------------------------------------------------------------------------|--|
|                                |                     |      |    |                                                                                                                                                                                                                                                                                          | <ul style="list-style-type: none"> <li>○ Chronic obstructive pulmonary disease: 2.68 CI: 0.23-31.20</li> <li>○ Diabetes 17.6, 4.84- 63.98</li> </ul>                                                                                                                                                                                                                                                                                                                                                                                     |  |
| Zhang G et al. 2020<br>(China) | 23-88               | 95   | R  |                                                                                                                                                                                                                                                                                          | <ul style="list-style-type: none"> <li>○ Age 40–60 years 0.54 CI: 0.23-1.28</li> <li>○ Male 1.85 CI: 0.77-4.46</li> </ul>                                                                                                                                                                                                                                                                                                                                                                                                                |  |
| Yu et al. 2020 (China)         | 0-88<br>years       | 333  | CS |                                                                                                                                                                                                                                                                                          | <ul style="list-style-type: none"> <li>○ &lt;60 years 10.79, 3.94- 29.53</li> <li>○ Male 4.6, 1.7-12.6)</li> <li>○ Heart disease 4.2, 1.2-14.2</li> <li>○ Diabetes 1.1 CI: 0.3-3.6</li> <li>○ Hypertensive 0.7, 0.2-2.0</li> <li>○ Respiratory disease 2.0, 0.2-18.3</li> <li>○ Smokers 0.89, 0.20 -4.01</li> <li>○ Alcohol 0.62, 0.22-1.70</li> </ul>                                                                                                                                                                                   |  |
| Hu H et al., 2020<br>(China)   | Mean 60<br>Sd 16.32 | 105  | R  | <ul style="list-style-type: none"> <li>○ Male 2.21, 0.73-6.70</li> <li>○ Age continuous</li> <li>○ Mean non survivors=75</li> <li>○ Mean survivors=57</li> <li>○ P value&lt;0.01</li> <li>○ Hypertension 1.34, 0.45-3.96</li> <li>○ Chronic pulmonary disease 4.0, 1.11-15.50</li> </ul> |                                                                                                                                                                                                                                                                                                                                                                                                                                                                                                                                          |  |
| Shi et al., 2020<br>(China)    |                     | 487  | CS |                                                                                                                                                                                                                                                                                          | <ul style="list-style-type: none"> <li>○ Age continuous <ul style="list-style-type: none"> <li>○ Mean severe=56</li> <li>○ Mean non severe=45</li> <li>○ P value &lt;0.001</li> </ul> </li> <li>○ Male 2.66, 1.37-5.17</li> <li>○ Smoking 1.60, 0.63-4.03</li> <li>○ Hypertension 5.65, 3.05-10.45</li> <li>○ Diabetes 3.15, 1.27-7.81</li> <li>○ Cardiovascular disease 5.47, 1.54-19.41</li> <li>○ Cancer 6.17 1.00-37.86</li> <li>○ Chronic liver disease 0.88, 0.20-3.92</li> <li>○ Chronic renal disease 3.68, 0.69-19.5</li> </ul> |  |
| Chen R et al., 2020<br>(China) | 65 to 74<br>years   | 1590 | R  |                                                                                                                                                                                                                                                                                          | <ul style="list-style-type: none"> <li>○ Age≥65 (HR*, 3.43; 95% CI, 1.24-9.5),</li> <li>○ Coronary heart disease (HR* 4.28; 95% CI, 1.14-16.13)</li> <li>○ Cerebrovascular disease (HR* 3.1; 95% CI, 1.07-8.94)</li> </ul>                                                                                                                                                                                                                                                                                                               |  |

|                                                             |                              |       |    |                                                                                                                                                                                                                                                                                                                                                                                                                                                                                                                 |                                                                                |                                          |
|-------------------------------------------------------------|------------------------------|-------|----|-----------------------------------------------------------------------------------------------------------------------------------------------------------------------------------------------------------------------------------------------------------------------------------------------------------------------------------------------------------------------------------------------------------------------------------------------------------------------------------------------------------------|--------------------------------------------------------------------------------|------------------------------------------|
| Dong Y et al., 2020<br>(China)                              | Median 7<br>years            | 2135  | R  |                                                                                                                                                                                                                                                                                                                                                                                                                                                                                                                 | ○ Children showed less severe COVID<br>19 illness than those of adult patients |                                          |
| MMWR 2020 (USA)                                             | All age                      | 4,226 | R  | ○ Age $\geq 65$ vs $<65$ = 8.84,<br>4.23- 18.48                                                                                                                                                                                                                                                                                                                                                                                                                                                                 |                                                                                | Age $\geq 65$ vs $<65$ = 2.62, 1.81-3.78 |
| Nepogodiev et al., 2020<br>(International, 24<br>Countries) | $<29$ - $\geq 70$            | 1128  | P  | ○ Age $<50$ vs $\geq 50$ = 9.03,<br>4.56 - 17.89<br>○ Male 1.79, 1.35 – 2.39<br>○ Comorbidities 4.78,<br>2.29 – 9.94<br>○ Smoking 1.02, 0.64 –<br>1.63<br>○ Asthma 1.17, 0.69 –<br>1.97<br>○ Cancer 0.91, 0.63 –<br>1.32<br>○ Chronic kidney disease<br>1.74, 1.21 – 2.49<br>○ Chronic respiratory<br>disease 1.85, 1.23 –<br>2.78<br>○ Cardiovascular disease<br>1.81, 1.13 – 2.89<br>○ Diabetes 1.15, 0.84 -<br>1.57<br>○ Hypertension 1.73, 1.31<br>– 2.29<br>○ Cerebrovascular disease<br>2.15, 1.37 – 3.37 |                                                                                |                                          |
| Abbas et al., 2020<br>(Iraq)                                | 18-80<br>Mean<br>48.60       | 284   | CS |                                                                                                                                                                                                                                                                                                                                                                                                                                                                                                                 | ○ Smoking 1.17, 0.65 – 2.07<br>○ Diabetes 1.97, 1.09 – 3.58                    |                                          |
| Acar et al., 2021<br>(Turkey)                               | $>18$<br>Mean<br>$69 \pm 14$ | 709   | R  | ○ Age $\geq 65$ vs $<65$ = 4.77<br>– 2.90<br>○ Hypertension 2.16, 1.31<br>– 3.57<br>○ Diabetes 2.61 1.46 -<br>4.63                                                                                                                                                                                                                                                                                                                                                                                              |                                                                                |                                          |

|                                  |                                          |        |    |                                                                                                                                                                                                                                                                                                     |                                                                                                                                                                          |  |
|----------------------------------|------------------------------------------|--------|----|-----------------------------------------------------------------------------------------------------------------------------------------------------------------------------------------------------------------------------------------------------------------------------------------------------|--------------------------------------------------------------------------------------------------------------------------------------------------------------------------|--|
|                                  |                                          |        |    | <ul style="list-style-type: none"> <li>○ Canver 11.96, 6.34 - 22.54</li> <li>○ Chronic respiratory disease 1.71, 0.85 - 3.41</li> <li>○ Cardiovascular disease 3.29, 1.85 - 5.85</li> <li>○ Chronic kidney disease 5.56, 2.53 - 12.21</li> </ul>                                                    |                                                                                                                                                                          |  |
| Biran et al., 2020<br>(USA)      | ≥18                                      | 764    | R  | <ul style="list-style-type: none"> <li>○ Age ≥65 vs &lt;65 (HR*) 2.10, 1.68 – 2.62</li> <li>○ Male (HR*) 1.41, 1.13 – 1.72</li> <li>○ Diabetes (HR*) 1.16, 0.95 – 1.41)</li> <li>○ Chronic respiratory disease (HR*) 1.07, 0.83 – 1.06)</li> <li>○ Hypertension (HR*) 1.32, 1.06 – 1.65)</li> </ul> |                                                                                                                                                                          |  |
| Adamuz et al., 2020<br>(Spain)   | Adult<br>Median<br>66.5<br>IQR 51-<br>77 | 1176   | R  | <ul style="list-style-type: none"> <li>○ Age ≥ 75 vs &lt;75 = 3.04, 1.79 – 5.15</li> <li>○ Male 1.86, 1.11 – 3.11</li> <li>○ Comorbidities 2.01, 1.03 – 3.90</li> </ul>                                                                                                                             | <ul style="list-style-type: none"> <li>○ Age ≥ 75 vs &lt;75 = 1.52, 1.02 – 2.26)</li> <li>○ Male 1.20, 0.87 – 1.67</li> <li>○ Comorbidities 1.81, 1.26 – 2.59</li> </ul> |  |
| Agarwal et al., 2020<br>(USA)    | >17<br>Mean<br>63.6<br>(62.9-<br>64.3)   | 21,300 | CS | <ul style="list-style-type: none"> <li>○ Cardiovascular disease 2.0, 1.2 – 3.4</li> </ul>                                                                                                                                                                                                           |                                                                                                                                                                          |  |
| Ahmad et al., 2020<br>(Pakistan) | 6 months<br>to 87<br>years               | 194    | R  | <ul style="list-style-type: none"> <li>○ Male 0.38, 0.14 – 1.05</li> </ul>                                                                                                                                                                                                                          |                                                                                                                                                                          |  |

|                                         |                                                |        |    |                                                                                                                                                                                                                                                                                                                                      |                                                                                                                                                                                                            |  |
|-----------------------------------------|------------------------------------------------|--------|----|--------------------------------------------------------------------------------------------------------------------------------------------------------------------------------------------------------------------------------------------------------------------------------------------------------------------------------------|------------------------------------------------------------------------------------------------------------------------------------------------------------------------------------------------------------|--|
|                                         | Median<br>34<br>IQR 27-48                      |        |    |                                                                                                                                                                                                                                                                                                                                      |                                                                                                                                                                                                            |  |
| Aiswarya et al., 2020<br>(India)        | Mean<br>50.1 ±<br>12.2                         | 48     | P  | <ul style="list-style-type: none"> <li>○ Age ≥50 vs &lt;50 = 1.00, 0.24 – 4.02</li> <li>○ Male 0.28, 0.06 – 1.30</li> <li>○ Diabetes 2.57, 0.61 – 10.71</li> <li>○ Hypertension 0.61, 0.09 – 3.71</li> </ul>                                                                                                                         | <ul style="list-style-type: none"> <li>○ Age ≥50 vs &lt;50 = 1.18, 0.37 - 3.71</li> <li>○ Male 0.82, 0.19 – 3.39</li> <li>○ Diabetes 1.3, 0.41 – 4.15</li> <li>○ Hypertension 0.95, 0.18 – 4.83</li> </ul> |  |
| Akbariqomi et al., 2020<br>(Iran)       | Median<br>55<br>IQR<br>45–63<br>Range<br>22–94 | 595    | R  | <ul style="list-style-type: none"> <li>○ Diabetes 2.23, 1.30 – 3.81</li> </ul>                                                                                                                                                                                                                                                       | <ul style="list-style-type: none"> <li>○ Male 3.05, 1.29 – 7.23</li> </ul>                                                                                                                                 |  |
| Akhtar et al., 2021<br>(UK)             | Not specified                                  | 293    | R  | <ul style="list-style-type: none"> <li>○ Age (continuous) 1.13, 1.07 – 1.16</li> <li>○ Male 0.85, 0.53 – 1.36</li> <li>○ Diabetes 0.90, 0.54 – 1.52</li> <li>○ Hypertension 1.20, 0.75 – 1.93</li> <li>○ Cancer 1.92, 1.04 – 3.55</li> <li>○ Stroke 1.81, 0.89 – 3.67</li> <li>○ Chronic kidney disease 0.77, 0.42 – 1.42</li> </ul> |                                                                                                                                                                                                            |  |
| Alahmari et al., 2021<br>(Saudi Arabia) | All ages                                       | 240474 | CS | <ul style="list-style-type: none"> <li>○ Age ≥60 vs &lt;60 = 9.18, 8.40 – 10.03</li> <li>○ Male 1.52, 1.36 – 1.69</li> </ul>                                                                                                                                                                                                         |                                                                                                                                                                                                            |  |
| Alasia et al., 2021<br>(Nigeria)        | 2-77 years                                     | 646    | P  | <ul style="list-style-type: none"> <li>○ Age &gt;50 vs ≤50 = 10.81, 3.27 – 35.75</li> <li>○ Male 4.44, 0.57 – 34.41</li> </ul>                                                                                                                                                                                                       | <ul style="list-style-type: none"> <li>○ Age &gt;50 vs ≤50 = 10.42, 5.90 – 18.42</li> <li>○ Male 1.95, 0.96 – 3.93</li> </ul>                                                                              |  |

|                                                   |                                                 |      |    |                                                                                                                                                                                                                                                                                                                                                          |                                                                                                                                                                                                                  |  |
|---------------------------------------------------|-------------------------------------------------|------|----|----------------------------------------------------------------------------------------------------------------------------------------------------------------------------------------------------------------------------------------------------------------------------------------------------------------------------------------------------------|------------------------------------------------------------------------------------------------------------------------------------------------------------------------------------------------------------------|--|
|                                                   | Mean<br>39.21 ±<br>12.31                        |      |    |                                                                                                                                                                                                                                                                                                                                                          |                                                                                                                                                                                                                  |  |
| Albani et al., 2020<br>(Italy)                    | ≥18                                             | 1403 | P  | <ul style="list-style-type: none"> <li>○ Male 1.62, 1.23 – 2.12</li> <li>○ Hypertension 0.89, 0.69 – 1.15</li> <li>○ Diabetes 1.26, 0.95 – 1.69</li> </ul>                                                                                                                                                                                               |                                                                                                                                                                                                                  |  |
| Alberici et al., 2020<br>(Italy)                  | Median<br>72<br>IQR 62-<br>79                   | 94   | P  | <ul style="list-style-type: none"> <li>○ Age &gt;70 vs ≤70 = 1.85, 0.75 – 4.78</li> <li>○ Male 1.05, 0.41 – 2.78</li> <li>○ Hypertension 0.27, 0.05 – 1.31</li> <li>○ Diabetes 1.7, 0.69 – 4.20</li> <li>○ Cardiovascular disease 3.11, 1.02 – 9.6</li> <li>○ Chronic respiratory disease 1.07, 0.22 – 4.2</li> <li>○ Cancer 1.5, 0.36 – 3.05</li> </ul> |                                                                                                                                                                                                                  |  |
| Alfraij et al., 2021<br>(Kuwait and Saudi Arabia) | <18 years<br>Median<br>2.78<br>IQR<br>0.21-8.51 | 25   | R  | <ul style="list-style-type: none"> <li>○ Male 2.25, 0.19 – 25.36</li> </ul>                                                                                                                                                                                                                                                                              |                                                                                                                                                                                                                  |  |
| Algado-Sellés et al., 2020<br>(Spain)             | Adults                                          | 1791 | CS | ○                                                                                                                                                                                                                                                                                                                                                        | <ul style="list-style-type: none"> <li>○ Age ≥60 vs &lt;60 = 2.9, 0.9 – 9.3</li> <li>○ Male 4.9, 1.8 – 13.6</li> <li>○ Cardiovascular disease 2.3, 0.4 – 12.1</li> <li>○ Hypertension 3.2, 0.7 – 13.5</li> </ul> |  |
| Aliberti et al., 2021<br>(Brazil)                 | Median<br>66                                    | 1428 | P  | <ul style="list-style-type: none"> <li>○ Age ≥65 vs &lt;65 = 2.27, 1.82 – 2.85</li> <li>○ Male 1.25, 1.01 – 1.56</li> </ul>                                                                                                                                                                                                                              |                                                                                                                                                                                                                  |  |
| Allard et al., 2020<br>(France)                   | Mean<br>61.8                                    | 108  | R  |                                                                                                                                                                                                                                                                                                                                                          | <ul style="list-style-type: none"> <li>○ Male 2.04, 0.85 – 4.85</li> <li>○ Diabetes 1.38, 0.61 – 3.13</li> </ul>                                                                                                 |  |



|                                       |                                |     |    |                                                                                                                                                                                                              |                                                                                                                                                                                                                                                               |                                                                                        |
|---------------------------------------|--------------------------------|-----|----|--------------------------------------------------------------------------------------------------------------------------------------------------------------------------------------------------------------|---------------------------------------------------------------------------------------------------------------------------------------------------------------------------------------------------------------------------------------------------------------|----------------------------------------------------------------------------------------|
|                                       | SD 15.8                        |     |    |                                                                                                                                                                                                              | <ul style="list-style-type: none"> <li>○ Hypertension 1.44, 0.63 – 3.32</li> <li>○ Smoking 1.95, 0.55 – 6.91</li> <li>○ Alcohol 2.14, 0.71 – 6.48</li> <li>○ Malnutrition 1.66, 0.77 – 3.56</li> </ul>                                                        |                                                                                        |
| Allenbach et al., 2020 (France)       | Median<br>77<br>Range<br>60-83 | 152 | P  |                                                                                                                                                                                                              | <ul style="list-style-type: none"> <li>○ Male 1.34, 0.65 – 2.77</li> <li>○ Age &gt;60 vs ≤60 = 2.94, 1.19 – 7.26</li> <li>○ Hypertension 1.05, 0.52 – 2.10</li> <li>○ Cardiovascular disease 1.44, 0.65 – 3.20</li> <li>○ Cancer 0.95, 0.39 – 2.27</li> </ul> |                                                                                        |
| Almaghlouth et al., 2020 (USA)        | Median<br>63<br>IQR 51-72      | 80  | P  | <ul style="list-style-type: none"> <li>○ Age ≥65 vs &lt;65 = 3.20, 0.58 – 17.60</li> <li>○ Male 0.27, 0.05 – 1.53</li> <li>○ Hypertension 0.68, 0.14 – 3.32</li> <li>○ Diabetes 1.29, 0.27 – 6.24</li> </ul> |                                                                                                                                                                                                                                                               |                                                                                        |
| Aloisio et al., 2020 (Italy)          | Median<br>61<br>IQR 50-73      | 427 | R  | <ul style="list-style-type: none"> <li>○ Age (continuous) 1.14, 1.03 – 1.27</li> </ul>                                                                                                                       |                                                                                                                                                                                                                                                               | <ul style="list-style-type: none"> <li>○ Age (continuous) 1.01, 0.98 – 1.02</li> </ul> |
| Alqahtani et al., 2020 (Saudi Arabia) | Not sepcified                  | 458 | CS |                                                                                                                                                                                                              | <ul style="list-style-type: none"> <li>○ Male 0.51, 0.24 – 1.09</li> <li>○ Diabetes 18.45, 9.28 – 36.69</li> <li>○ Hypertension 92.80, 39.26 – 219.36</li> <li>○ Asthma 3.09, 0.95 – 10.01</li> <li>○ Cardiovascular disease 4.51, 1.09 – 18.67</li> </ul>    |                                                                                        |
| Al-Salameh et al., 2020 (France)      | Median<br>73                   | 433 | P  | <ul style="list-style-type: none"> <li>○ Diabetes 0.77, 0.44 – 1.34</li> </ul>                                                                                                                               |                                                                                                                                                                                                                                                               | <ul style="list-style-type: none"> <li>○ Diabetes 1.78, 1.12 – 2.83</li> </ul>         |
| Al-Samkari et al., 2020 (USA)         | Adults                         | 400 | R  |                                                                                                                                                                                                              | <ul style="list-style-type: none"> <li>○ Male 0.61, 0.41 – 0.93</li> <li>○ Hispanic vs non-hispanic 1.01, 0.65 – 1.59</li> </ul>                                                                                                                              |                                                                                        |

|                                  |                          |      |   |                                                                                                                                                                                                                                                                                                                                                                                                                                                                                    |                                                                                                                                                                                                                                                                                                  |  |
|----------------------------------|--------------------------|------|---|------------------------------------------------------------------------------------------------------------------------------------------------------------------------------------------------------------------------------------------------------------------------------------------------------------------------------------------------------------------------------------------------------------------------------------------------------------------------------------|--------------------------------------------------------------------------------------------------------------------------------------------------------------------------------------------------------------------------------------------------------------------------------------------------|--|
|                                  |                          |      |   |                                                                                                                                                                                                                                                                                                                                                                                                                                                                                    | <ul style="list-style-type: none"> <li>○ Cardiovascular disease 0.90, 0.58 – 1.41</li> <li>○ Chronic pulmonary disease 0.80, 0.47 – 1.36</li> <li>○ Diabetes 1.98, 1.28 – 3.06</li> <li>○ Chronic kidney disease 2.74, 0.76 – 9.87</li> <li>○ Chronic liver disease 0.81, 0.30 – 2.18</li> </ul> |  |
| Alser et al., 2021 (USA)         | Median 60<br>IQR 47-70   | 235  | P | <ul style="list-style-type: none"> <li>○ Age<math>\geq</math>60 vs &lt;60 = 4.18, 2.13 – 8.17</li> <li>○ Male 2.49, 0.89 – 7.00</li> <li>○ Hispanic vs non-hispanic 0.41, 0.21 – 0.79</li> <li>○ Hypertension 2.25, 1.22 – 4.17</li> <li>○ Chronic pulmonary disease 5.06, 1.83 – 14.00</li> <li>○ Smoker 2.76, 1.50 – 5.27</li> <li>○ Stroke 5.94, 1.67 – 21.09</li> <li>○ Chronic liver disease 2.55, 0.66 – 9.83</li> <li>○ Chronic kidney disease 2.17, 0.66 – 9.83</li> </ul> |                                                                                                                                                                                                                                                                                                  |  |
| Alsharidah et al., 2021 (Kuwait) | Median 54<br>Range 15-82 | 368  | P |                                                                                                                                                                                                                                                                                                                                                                                                                                                                                    | <ul style="list-style-type: none"> <li>○ Male 1.12, 0.63 – 1.97</li> <li>○ Diabetes 0.95, 0.62 – 1.48</li> <li>○ Hypertension 1.34, 0.86 – 2.09</li> <li>○ Obesity 1.28, 0.63-2.61</li> </ul>                                                                                                    |  |
| Altschul et al., 2020 (USA)      | Mean 63.3                | 4711 | P | <ul style="list-style-type: none"> <li>○ Age <math>\geq</math> 60 vs &lt;60 = 2.4, 1.18 – 5.16</li> <li>○ Male 1.05, 0.63 – 1.72</li> <li>○ Diabetes 0.95, 0.78 – 1.16</li> </ul>                                                                                                                                                                                                                                                                                                  |                                                                                                                                                                                                                                                                                                  |  |

|                                 |                       |       |   |                                                                                                                                                                                                                                                                                                                                                                     |  |                                                                                                                                             |
|---------------------------------|-----------------------|-------|---|---------------------------------------------------------------------------------------------------------------------------------------------------------------------------------------------------------------------------------------------------------------------------------------------------------------------------------------------------------------------|--|---------------------------------------------------------------------------------------------------------------------------------------------|
|                                 |                       |       |   | ○ Chronic respiratory disease 1.46, 1.06 – 2.02                                                                                                                                                                                                                                                                                                                     |  |                                                                                                                                             |
| Alzaid et., 2020 (USA)          | Not sepcified         | 45    | P |                                                                                                                                                                                                                                                                                                                                                                     |  | ○ Diabetes 1.37, 0.35 – 5.43                                                                                                                |
| Del Amo et al., 2020 (Spain)    | Range 20-79           | 77590 | P | ○ Male 0.59, 0.18 – 1.91<br>○ Age ≥60 vs <60 = 4.64, 1.81 – 11.89                                                                                                                                                                                                                                                                                                   |  | ○ Male 0.60, 0.16 - 2.27<br>○ Age ≥60 vs <60 = 2.28, 0.77 – 6.71                                                                            |
| Anaklı etal., 2021 (Turkey)     | Mean 67 SD 16         | 104   | R | ○ Male 0.95, 0.40-2.27<br>○ Cardiovascular disease 1.84, 0.81 – 4.18<br>○ Hypertension 1.77, 0.84 – 3.73<br>○ Diabetes 1.79, 0.76 – 4.22<br>○ Chronic respiratory disease 1.40, 0.54 – 3.66<br>○ Cancer 2.64, 0.80 – 8.69<br>○ Chronic renal disease 1.54, 0.37 – 6.34<br>○ Chronic liver disease 0.61, 0.04 – 10.09<br>○ Cerebrovascular disease 1.33, 0.31 – 5.65 |  |                                                                                                                                             |
| Anantharamna et al., 2020 (USA) | ≥18                   | 4627  | R | ○ Male 1.72, 1.17 – 2.56<br>○ Hypertension 1.71, 1.13 – 2.60<br>○ Diabetes 1.27, 0.81 – 2.00<br>○ Smoking 1.15, 0.76 – 1.73                                                                                                                                                                                                                                         |  | ○ Male 2.08, 1.58 – 2.70<br>○ Hypertension 2.74, 1.99 – 3.76<br>○ Diabetes 1.41, 1.00 – 1.99<br>○ Smoking 1.10, 0.83 – 1.46                 |
| Andargie et al., 2021 (USA)     | Median 48.5 IQR 37-56 | 85    | P | ○                                                                                                                                                                                                                                                                                                                                                                   |  | ○ Male 3.73, 1.21 – 11.50<br>○ Hypertension 0.64, 0.22 – 1.83<br>○ Diabetes 0.71, 0.23 – 2.00<br>○ Cardiovascular disease 0.57, 0.16 – 2.08 |

|                                                |                                    |     |   |                                                                                                                                                                                                                                                                                                                                                           |  |                             |
|------------------------------------------------|------------------------------------|-----|---|-----------------------------------------------------------------------------------------------------------------------------------------------------------------------------------------------------------------------------------------------------------------------------------------------------------------------------------------------------------|--|-----------------------------|
|                                                |                                    |     |   |                                                                                                                                                                                                                                                                                                                                                           |  | ○ Obesity 2.46, 0.77 – 7.86 |
| Angelidi et al., 2021<br>(USA)                 | Median<br>66                       | 144 | R | <ul style="list-style-type: none"> <li>○ Age continuous, 1.81, 1.05-3.13</li> <li>○ Male 2.00, 0.47 – 8.63</li> <li>○ Smoking 1.26, 0.23 – 7.02</li> <li>○ Cardiovascular disease 2.47, 0.43 – 14.39</li> <li>○ Chronic respiratory disease 6.69, 1.10 – 40.89</li> <li>○ Diabetes 0.49, 0.11 – 2.09</li> <li>○ Hypertension 0.84, 0.15 – 0.84</li> </ul> |  |                             |
| Angelis et al., 2020<br>(UK)                   |                                    |     |   | <ul style="list-style-type: none"> <li>○ Age (continuous) 1.06, 1.02–1.09</li> <li>○ Male 2.12, 0.86 – 5.18</li> </ul>                                                                                                                                                                                                                                    |  |                             |
| Antúnez-Montes et al.,<br>2021 (Multinational) | Median 3<br>years<br>IQR 0.6-<br>9 | 409 | P |                                                                                                                                                                                                                                                                                                                                                           |  | ○ Male 1.17, 0.65 – 2.11    |
| Aoun et al., 2021<br>(Labanon)                 | Mean<br>61.46<br>SD 13.99          | 231 | R | <ul style="list-style-type: none"> <li>○ Male 1.16, 0.63 – 2.14</li> <li>○ Smoking 1.12, 0.56 – 2.27</li> <li>○ Hypertension 1.65, 0.60 – 4.55</li> <li>○ Diabetes 1.34, 0.71 – 2.54</li> <li>○ Obesity 0.88, 0.41 – 1.88</li> <li>○ Cardiovascular disease 4.42, 2.06 – 9.49</li> <li>○ Stroke 2.17, 0.89 – 8.28</li> </ul>                              |  |                             |

|                                |                           |      |   |                                                                                                                                                                                                                                                                                                                                                                                                                      |  |  |
|--------------------------------|---------------------------|------|---|----------------------------------------------------------------------------------------------------------------------------------------------------------------------------------------------------------------------------------------------------------------------------------------------------------------------------------------------------------------------------------------------------------------------|--|--|
|                                |                           |      |   | <ul style="list-style-type: none"> <li>○ Chronic respiratory disease 2.03, 0.85 – 4.86</li> <li>○ Cancer 1.81, 0.68 – 4.76</li> </ul>                                                                                                                                                                                                                                                                                |  |  |
| Apea et al., 2021 (UK)         | ≥16                       | 1737 | P | <ul style="list-style-type: none"> <li>○ Age (HR) 4.50, 3.74 – 5.42</li> <li>○ Male (HR) 1.55, 1.28 – 1.87</li> </ul>                                                                                                                                                                                                                                                                                                |  |  |
| Atkins et al., 2020 (UK)       | MEAN<br>74.3<br>SD 4.5    | 507  | P | <ul style="list-style-type: none"> <li>○ Male 2.12, 1.45 – 3.09</li> <li>○ Stroke 0.93, 0.40 – 2.17</li> <li>○ Hypertension 1.42, 0.96 – 2.11</li> <li>○ Diabetes 3.11, 2.06 – 4.71</li> <li>○ Chronic kidney disease 0.88, 0.35 – 2.24</li> <li>○ Asthma 0.59, 0.33 – 1.04</li> <li>○ Chronic respiratory disease 1.91, 1.10 – 3.32</li> </ul>                                                                      |  |  |
| Attuabi et al., 2021 (Denmark) | Median<br>55<br>IQR 41-74 | 328  | P | <ul style="list-style-type: none"> <li>○ Age&gt;65 vs ≤65 = 4.82, 1.22 – 24.22</li> <li>○ Smoker 1.31, 0.49 – 4.86</li> <li>○ Hypertension 0.75, 0.22 – 2.37</li> <li>○ Diabetes 1.50, 0.39 – 5.29</li> <li>○ Cardiovascular disease 4.28, 1.15 – 16.50</li> <li>○ Chronic renal disease 3.63, 0.76 – 13.36</li> <li>○ Chronic respiratory disease 3.96, 0.85 – 18.71</li> <li>○ Stroke 1.31, 0.20 – 4.99</li> </ul> |  |  |

|                               |                        |        |    |                                                                                                                                                                                                                                                                                                                                                                                                                                              |  |                                                                                                                                                                                                                                                                                                                                   |
|-------------------------------|------------------------|--------|----|----------------------------------------------------------------------------------------------------------------------------------------------------------------------------------------------------------------------------------------------------------------------------------------------------------------------------------------------------------------------------------------------------------------------------------------------|--|-----------------------------------------------------------------------------------------------------------------------------------------------------------------------------------------------------------------------------------------------------------------------------------------------------------------------------------|
|                               |                        |        |    | <ul style="list-style-type: none"> <li>○ Cancer 3.18, 0.80 – 12.78</li> </ul>                                                                                                                                                                                                                                                                                                                                                                |  |                                                                                                                                                                                                                                                                                                                                   |
| Auld et al., 2020 (USA)       | Median 64<br>IQR 54-73 | 217    | P  | <ul style="list-style-type: none"> <li>○ Age <math>\geq 65</math> vs <math>&lt;65</math> = 4.06, 2.12 – 7.77</li> <li>○ Male 0.77, 0.42 – 1.39</li> <li>○ Hypertension 1.15, 0.62 – 2.13</li> <li>○ Cardiovascular disease 1.13, 0.54 – 2.35</li> <li>○ Diabetes 1.08, 0.59 – 1.95</li> <li>○ Chronic kidney disease 2.68, 1.39 – 5.17</li> <li>○ Asthma 0.65, 0.20 – 2.07</li> <li>○ Chronic pulmonary disease 0.83, 0.28 – 2.42</li> </ul> |  |                                                                                                                                                                                                                                                                                                                                   |
| Avruscio et al., 2020 (Italy) | $\leq 18$              | 85     | CS | <ul style="list-style-type: none"> <li>○</li> </ul>                                                                                                                                                                                                                                                                                                                                                                                          |  | <ul style="list-style-type: none"> <li>○ Male 2.36, 0.88 – 6.32</li> <li>○ Hypertension 0.86, 0.36-2.01</li> <li>○ Diabetes 0.67, 0.25 – 1.79</li> <li>○ Chronic respiratory disease 1.39, 0.35 – 5.57</li> <li>Cancer 1.08, 0.28 – 4.05</li> </ul>                                                                               |
| Aw et al., 2020 (UK)          | $\geq 65$              | 677    | P  | <ul style="list-style-type: none"> <li>○ Male 2.02, 1.47 – 2.77</li> </ul>                                                                                                                                                                                                                                                                                                                                                                   |  |                                                                                                                                                                                                                                                                                                                                   |
| Awad et al., 2021 (USA)       | Median 64.3            | 336    | R  | <ul style="list-style-type: none"> <li>○</li> </ul>                                                                                                                                                                                                                                                                                                                                                                                          |  | <ul style="list-style-type: none"> <li>○ Age 1.00, 0.98 – 1.02</li> <li>○ Male 1.17, 0.66 – 2.10</li> <li>○ Obesity 1.26, 0.69 – 2.31</li> <li>○ Diabetes 1.09, 0.59 – 2.03</li> </ul>                                                                                                                                            |
| Azar et al., 2020 (USA)       | Mean 50.7              | 14,036 | R  | <ul style="list-style-type: none"> <li>○ Age <math>\geq 60</math> vs <math>&lt;60</math> = 14.17, 5.98 – 33.55</li> <li>○ Male 1.95, 1.08 – 3.51</li> <li>○ Cardiovascular disease 7.95, 4.35 – 14.51</li> <li>○ Diabetes 2.41, 1.26 – 4.56</li> </ul>                                                                                                                                                                                       |  | <ul style="list-style-type: none"> <li>○ Age <math>\geq 60</math> vs <math>&lt;60</math> = 3.69, 2.43 – 5.59</li> <li>○ Male 1.93, 1.28 – 2.90</li> <li>○ Cardiovascular disease 3.53, 2.14 – 5.81</li> <li>○ Diabetes 3.53, 2.26 – 5.51</li> <li>○ Cancer 2.27, 1.13 – 4.52</li> <li>○ Hypertension 3.05, 2.04 – 4.56</li> </ul> |

|                                |                    |         |    |                                                                                                                                                                                                                                                                                                                                                                                                             |                                                                                                                 |                                                                                                                                        |
|--------------------------------|--------------------|---------|----|-------------------------------------------------------------------------------------------------------------------------------------------------------------------------------------------------------------------------------------------------------------------------------------------------------------------------------------------------------------------------------------------------------------|-----------------------------------------------------------------------------------------------------------------|----------------------------------------------------------------------------------------------------------------------------------------|
|                                |                    |         |    | <ul style="list-style-type: none"> <li>○ Cancer 5.18, 2.44 – 11.00</li> <li>○ Hypertension 3.26, 1.83 – 5.78</li> <li>○ Chronic respiratory disease 7.44, 3.30 – 16.77</li> <li>○ Asthma 1.99, 0.97 – 4.09</li> </ul>                                                                                                                                                                                       |                                                                                                                 | <ul style="list-style-type: none"> <li>○ Chronic respiratory disease 5.12, 2.53 – 10.39</li> <li>○ Asthma 1.89, 1.12 – 3.21</li> </ul> |
| Azwar et al., 2020 (Indonesia) | ≥60                | 44      | CS | ○ Male 6.3, 0.71 – 55.50                                                                                                                                                                                                                                                                                                                                                                                    |                                                                                                                 |                                                                                                                                        |
| Baggio et al., 2021 (Brazil)   | 41                 | 59,695  | CS | <ul style="list-style-type: none"> <li>○ Male 1.64, 1.47 – 1.82</li> <li>○ Age ≥60 vs &lt;60 = 11.87, 10.5 – 13.36</li> <li>○ Cardiovascular 1.26, 1.07 – 1.49</li> <li>○ Diabetes 2.82, 2.46 – 3.24</li> <li>○ Chronic respiratory disease 1.55, 1.13 – 2.14</li> <li>○ Hypertension 1.75, 1.43 – 2.14</li> <li>○ Obesity 3.22, 1.87 – 5.54</li> <li>○ Chronic kidney disease 2.55, 1.73 – 3.75</li> </ul> |                                                                                                                 |                                                                                                                                        |
| Bailey et al., 2021 (USA)      | Mean 8.8<br>Sd 6.7 | 135,794 | P  |                                                                                                                                                                                                                                                                                                                                                                                                             | <ul style="list-style-type: none"> <li>○ Male 0.54, 0.45 – 0.65</li> <li>○ Obesity 1.39, 1.13 – 1.72</li> </ul> |                                                                                                                                        |
| Bannaga et al., 2020 (UK)      | Median 73          | 321     | R  | <ul style="list-style-type: none"> <li>○ Age &gt;65 vs ≤65 = 5.35, 2.94 – 9.70</li> <li>○ Male 1.04, 0.65 – 1.68</li> </ul>                                                                                                                                                                                                                                                                                 |                                                                                                                 | <ul style="list-style-type: none"> <li>○ Age&gt;65 vs ≤65 = 0.26, 0.13 – 0.51</li> <li>○ Male 2.33, 1.13 – 4.79</li> </ul>             |
| Baqui et al., 2020 (Brazil)    | Not specified      | 11,321  | CS | <ul style="list-style-type: none"> <li>○ Male 1.12, 1.03 – 1.23</li> <li>○ Cardiovascular disease 2.32, 2.09 – 2.55</li> <li>○ Asthma 0.66, 0.51 – 0.84</li> </ul>                                                                                                                                                                                                                                          |                                                                                                                 |                                                                                                                                        |

|                                        |                  |                |    |                                                                                                                                                                                                                                                                                                                                                                                                                                                                    |  |  |
|----------------------------------------|------------------|----------------|----|--------------------------------------------------------------------------------------------------------------------------------------------------------------------------------------------------------------------------------------------------------------------------------------------------------------------------------------------------------------------------------------------------------------------------------------------------------------------|--|--|
|                                        |                  |                |    | <ul style="list-style-type: none"> <li>○ Diabetes 2.54, 2.28 – 2.83</li> <li>○ Chronic respiratory disease 2.52, 2.02 – 3.12</li> <li>○ Obesity 1.57, 1.25 – 1.96</li> <li>○ Chronic renal disease 3.74, 2.97 – 4.73</li> <li>○ Chronic liver disease 2.28, 1.45 – 3.59</li> </ul>                                                                                                                                                                                 |  |  |
| Barbui et al., 2021<br>(Multinational) | Adults           | 175            | R  | <ul style="list-style-type: none"> <li>○ Age <math>\geq 60</math> vs <math>&lt; 60</math> = 11.05, 2.55 – 47.81</li> <li>○ Male 2.48, 1.01 – 6.07</li> <li>○ Cardiovascular disease 2.18, 0.64 – 7.36</li> <li>○ Cerebrovascular disease 0.86, 0.32 – 2.34</li> <li>○ Chronic kidney disease 3.22, 1.22 – 8.49</li> <li>○ Chronic respiratory disease 1.49, 0.61 – 3.64</li> <li>○ Hypertension 1.67, 0.83 – 3.33</li> <li>○ Diabetes 2.65, 1.08 – 6.50</li> </ul> |  |  |
| Barron et al., 2020<br>(UK)            | Adults           | 614,144,<br>70 | CS | <ul style="list-style-type: none"> <li>○ Diabetes 9.15, 8.91 – 9.41</li> </ul>                                                                                                                                                                                                                                                                                                                                                                                     |  |  |
| Bartoletti et al., 2020<br>(Italy)     | Mean 74<br>SD 12 | 513            | P  | <ul style="list-style-type: none"> <li>○ Age (continuous) 1.06, 1.03 – 1.09)</li> <li>○ Male 1.43, 0.72 – 2.83</li> <li>○ Obesity 1.40, 0.88 – 2.23</li> <li>○ Hypertension 1.66, 0.93 – 2.96</li> </ul>                                                                                                                                                                                                                                                           |  |  |



|                                    |                           |      |    |                                                                                                                                                                                                                                                  |                                                                                                                                                                                                                                                                                                                                                                                                                                                         |                                                                                                                                                                                                                                                                                                                                    |
|------------------------------------|---------------------------|------|----|--------------------------------------------------------------------------------------------------------------------------------------------------------------------------------------------------------------------------------------------------|---------------------------------------------------------------------------------------------------------------------------------------------------------------------------------------------------------------------------------------------------------------------------------------------------------------------------------------------------------------------------------------------------------------------------------------------------------|------------------------------------------------------------------------------------------------------------------------------------------------------------------------------------------------------------------------------------------------------------------------------------------------------------------------------------|
|                                    |                           |      |    | <ul style="list-style-type: none"> <li>○ Diabetes 1.20, 0.72 – 2.83</li> <li>○ Cerebrovascular disease 2.78, 1.73 – 4.45</li> <li>○ Chronic kidney disease 0.75, 0.28 – 2.01</li> <li>○ Chronic respiratory disease 1.88, 1.16 – 3.90</li> </ul> |                                                                                                                                                                                                                                                                                                                                                                                                                                                         |                                                                                                                                                                                                                                                                                                                                    |
| Bauer et al., 2020 (USA)           | Range<br>18-100           | 1449 | P  |                                                                                                                                                                                                                                                  | <ul style="list-style-type: none"> <li>○ Male 1.29, 0.99 – 1.69</li> <li>○ Smoking 1.80, 1.35 – 2.41</li> <li>○ Hypertension 1.33, 0.95 – 1.84</li> <li>○ Diabetes 1.47, 1.06 – 2.04</li> <li>○ Chronic respiratory disease 1.42, 1.03 – 1.97</li> <li>○ Cardiovascular disease 1.72, 1.09 – 2.70</li> <li>○ Chronic kidney disease 1.80, 1.24 – 2.61</li> <li>○ Cancer 1.72, 1.11 – 2.67</li> <li>○ Chronic liver disease 2.14, 0.76 – 6.07</li> </ul> |                                                                                                                                                                                                                                                                                                                                    |
| Becerra-Munoz et al., 2021 (Spain) | Median<br>76<br>IQR 71-83 | 1520 | P  | <ul style="list-style-type: none"> <li>○ Age <math>\geq 75</math> vs <math>&lt; 75</math> = 3.54, 1.76 – 8.38</li> <li>○ Chronic kidney disease 3.36, 1.00 – 11.33</li> </ul>                                                                    |                                                                                                                                                                                                                                                                                                                                                                                                                                                         |                                                                                                                                                                                                                                                                                                                                    |
| Bedock et al., 2020 (France)       | Mean<br>59.9<br>SD 15.9   | 114  | CS | <ul style="list-style-type: none"> <li>○ Malnutrition 1.90, 0.2 – 12.3</li> </ul>                                                                                                                                                                |                                                                                                                                                                                                                                                                                                                                                                                                                                                         | <ul style="list-style-type: none"> <li>○ Malnutrition 0.58, 0.1 – 1.9</li> </ul>                                                                                                                                                                                                                                                   |
| Belli et al., 2021 (Multinational) | Adults                    | 243  | CS | <ul style="list-style-type: none"> <li>○ Male (HR) 1.39, 0.71 – 2.73</li> <li>○ Diabetes (HR) 1.98, 1.11 – 3.54</li> <li>○ Hypertension (HR) 1.76, 0.98 – 3.17</li> </ul>                                                                        |                                                                                                                                                                                                                                                                                                                                                                                                                                                         | <ul style="list-style-type: none"> <li>○ Age <math>&gt; 60</math> vs <math>\leq 60</math> = 1.40, 0.67 – 2.91</li> <li>○ Male 0.99, 0.46 – 2.14</li> <li>○ Alcohol 0.81, 0.35 – 1.89</li> <li>○ Diabetes 1.84, 0.91 – 3.72</li> <li>○ Hypertension 5.48, 2.38 – 12.58</li> <li>○ Chronic lung disease 0.45, 0.10 – 2.01</li> </ul> |

|                                              |                               |     |    |                                                                                                                                                                                                                                                                                                                                                                                                                          |  |                                                                                                                                   |
|----------------------------------------------|-------------------------------|-----|----|--------------------------------------------------------------------------------------------------------------------------------------------------------------------------------------------------------------------------------------------------------------------------------------------------------------------------------------------------------------------------------------------------------------------------|--|-----------------------------------------------------------------------------------------------------------------------------------|
|                                              |                               |     |    | <ul style="list-style-type: none"> <li>○ Chronic lung disease (HR) 0.55, 0.17 – 1.76</li> <li>○ Chronic kidney disease (HR) 1.72, 0.92 – 3.22</li> <li>○ Smoking (HR) 1.62, 0.72 – 3.63</li> </ul>                                                                                                                                                                                                                       |  | <ul style="list-style-type: none"> <li>○ Chronic kidney disease 1.11, 0.47 – 2.61</li> <li>○ Smoking 1.90, 0.71 – 5.14</li> </ul> |
| Otero et al., 2021<br>(Spain)                | Median<br>82<br>IQR 75-<br>88 | 83  | P  | <ul style="list-style-type: none"> <li>○ Male 0.97, 0.37 – 2.54</li> <li>○ Diabetes 1.12, 0.42 – 2.93</li> <li>○ Hypertension 4.82, 1.02 – 22.75</li> <li>○ Obesity 0.82, 0.27 – 2.43</li> <li>○ Chronic lung disease 0.91, 0.22 – 3.77</li> <li>○ Cerebrovascular disease 4.91, 1.07 – 22.52</li> <li>○ Cancer 0.24, 0.02 – 2.02</li> <li>○ Smoking 0.53, 0.16 – 1.81</li> </ul>                                        |  |                                                                                                                                   |
| Alguwaihes et al.,<br>2021<br>(Saudi Arabia) | Mean<br>56.6<br>SD 16.2       | 222 | R  | <ul style="list-style-type: none"> <li>○ Age &gt;60 vs ≤60 = 1.4, 0.63 – 3.1</li> <li>○ Male 3.3, 1.2 – 9.2</li> <li>○ Smoking 1.7, 0.2 – 20.0</li> <li>○ Diabetes 1.7, 0.7 – 4.0</li> <li>○ Hypertension 1.0, 0.4 – 2.6</li> <li>○ Cerebrovascular disease 2.3, 0.8 – 6.1</li> <li>○ Cardiovascular disease 1.4, 0.4 – 4.3</li> <li>○ Chronic kidney disease 3.5, 1.4 – 8.7</li> <li>○ Stroke 2.0, 0.5 – 7.1</li> </ul> |  |                                                                                                                                   |
| Allameh et al., 2020<br>(Iran)               | Mean<br>56.9<br>SD 15.7       | 396 | CS | <ul style="list-style-type: none"> <li>○ Male 1.39, 0.82 – 2.35</li> <li>○ Age &gt;60 vs ≤60 = 3.72, 2.14 – 6.43</li> </ul>                                                                                                                                                                                                                                                                                              |  |                                                                                                                                   |

|                                 |                        |      |   |                                                                                                                                                                                                                                                                                                                                                                                                                                                                                    |                                                                                                                                                                      |                          |
|---------------------------------|------------------------|------|---|------------------------------------------------------------------------------------------------------------------------------------------------------------------------------------------------------------------------------------------------------------------------------------------------------------------------------------------------------------------------------------------------------------------------------------------------------------------------------------|----------------------------------------------------------------------------------------------------------------------------------------------------------------------|--------------------------|
|                                 |                        |      |   | <ul style="list-style-type: none"> <li>○ Diabetes 0.91, 0.54 – 1.55</li> <li>○ Hypertension 1.26, 0.77 – 2.06</li> <li>○ Cardiovascular disease 1.51, 0.88 – 2.62</li> </ul>                                                                                                                                                                                                                                                                                                       |                                                                                                                                                                      |                          |
| Amanat et al., 2021 (Iran)      | Mean 60.71<br>SD 18.14 | 873  | P | <ul style="list-style-type: none"> <li>○ Age &gt;60 vs ≤60 = 8.79, 4.94 – 15.62</li> <li>○ Male 1.36, 0.90 – 2.06</li> <li>○ Smoking 2.69, 1.73 – 4.19</li> </ul>                                                                                                                                                                                                                                                                                                                  | <ul style="list-style-type: none"> <li>○ Age &gt;60 vs ≤60 = 1.63, 1.23 – 2.16</li> <li>○ Male 1.38, 1.03 – 1.86</li> <li>○ Smoking 1.62, 1.12 – 2.35</li> </ul>     |                          |
| Annweiler et al., 2020 (France) | Mean 88<br>SD 5        | 77   | P |                                                                                                                                                                                                                                                                                                                                                                                                                                                                                    | <ul style="list-style-type: none"> <li>○ Age (continuous) 1.05, 0.88 – 1.25</li> <li>○ Cancer 7.30, 1.37 – 38.8</li> <li>○ Hypertension 0.51, 0.11 – 2.33</li> </ul> |                          |
| Antúnez-Montes et al., 2021     | Median 3<br>IQR 0.6-9  | 409  | P |                                                                                                                                                                                                                                                                                                                                                                                                                                                                                    |                                                                                                                                                                      | ○ Male 1.17, 0.65 – 2.11 |
| Berenguer et al., 2020 (Spain)  | Median 70              | 4035 | R | <ul style="list-style-type: none"> <li>○ Male 1.57, 1.35 – 1.82</li> <li>○ Age&gt;60 vs ≤60 = 7.53, 6.03 – 9.41</li> <li>○ Smoking 1.84, 1.56 – 2.17</li> <li>○ Hypertension 3.23, 2.78 – 3.74</li> <li>○ Cardiovascular disease 3.21, 2.75 – 3.75</li> <li>○ Diabetes 2.16, 1.84 – 2.53</li> <li>○ Chronic lung disease 2.35, 1.98 – 2.77</li> <li>○ Obesity 1.63, 1.33 – 1.99</li> <li>○ Asthma 0.76, 0.57 – 1.00</li> <li>○ Chronic kidney disease 3.68, 2.76 – 4.92</li> </ul> |                                                                                                                                                                      |                          |

|                               |                        |       |    |                                                                                                                                                      |                                                                                                                                                                                                                                                                                                                                                                                                     |  |
|-------------------------------|------------------------|-------|----|------------------------------------------------------------------------------------------------------------------------------------------------------|-----------------------------------------------------------------------------------------------------------------------------------------------------------------------------------------------------------------------------------------------------------------------------------------------------------------------------------------------------------------------------------------------------|--|
|                               |                        |       |    | ○                                                                                                                                                    |                                                                                                                                                                                                                                                                                                                                                                                                     |  |
| Bernard et al., 2021 (France) | All ages               | 89530 | R  | ○ Cancer 2.7, 2.5 – 2.8                                                                                                                              |                                                                                                                                                                                                                                                                                                                                                                                                     |  |
| Bertsimas et al., 2020 (USA)  | Median 68<br>IQR 57-79 | 3062  | CS | ○ Male 1.46, 1.23 – 1.73<br>○ Chronic kidney disease 2.48, 1.55 – 3.98<br>○ Cardiovascular disease 1.74, 1.20 – 2.54<br>○ Diabetes 1.47, 1.16 – 1.85 |                                                                                                                                                                                                                                                                                                                                                                                                     |  |
| Betti et al., 2021            | MEAN 53.6<br>SD 9.7    | 171   | R  |                                                                                                                                                      | ○ Age $\geq 50$ vs $< 50$ = 3.23, 1.42 – 7.37<br>○ Cardiovascular disease 0.38, 0.09 – 1.50<br>○ Cerebrovascular disease 1.65, 0.27 – 10.14<br>○ Diabetes 0.71, 0.19 – 2.61                                                                                                                                                                                                                         |  |
| Bhargava et al., 2020 (USA)   | Mean 60.6              | 197   | R  |                                                                                                                                                      | ○ Age $> 60$ vs $\leq 60$ = 1.84, 1.02 – 3.31<br>○ Male 0.57, 0.32 – 1.03<br>○ Cardiovascular disease 1.68, 0.76 – 3.71<br>○ Cerebrovascular disease 1.53, 0.56 – 4.17<br>○ Diabetes 2.91, 1.62 – 5.25<br>○ Chronic renal disease 3.03, 1.38 – 6.63<br>○ Chronic respiratory disease 2.16, 1.05 – 4.42<br>○ Cancer 1.11, 0.30 – 4.08<br>○ Hypertension 1.55, 0.81-2.98<br>○ Obesity 1.45, 0.78-2.72 |  |
| Bhatt et al., 2021 (USA)      | Not specified          | 8383  | CS | ○ Age. Reference= $< 60$<br>60-69= 1.65, 1.36 – 2.00<br>70-79=2.26, 1.88 - 2.72<br>$> 80$ = 2.86, 2.38 – 3.45<br>○ Male 1.26, 1.13 – 1.40            |                                                                                                                                                                                                                                                                                                                                                                                                     |  |

|                                 |                         |     |   |                                                                                                                                                                                                                                                                                                                                                                                         |                                                                                                                  |  |
|---------------------------------|-------------------------|-----|---|-----------------------------------------------------------------------------------------------------------------------------------------------------------------------------------------------------------------------------------------------------------------------------------------------------------------------------------------------------------------------------------------|------------------------------------------------------------------------------------------------------------------|--|
|                                 |                         |     |   | <ul style="list-style-type: none"> <li>○ Diabetes 1.13, 1.01 – 1.26</li> <li>○ Hypetension 0.99, 0.86 – 1.14</li> <li>○ Chonic kidney disease 1.45, 1.29 – 1.62</li> <li>○ Chronic lung disease 1.20, 1.07 – 1.33</li> <li>○ Smoking 0.96, 0.86 – 1.07</li> <li>○ Cancer 1.33, 1.02 – 1.74</li> </ul>                                                                                   |                                                                                                                  |  |
| Bianchetti et al., 2020 (Italy) | Mean<br>70.7<br>SD 12.9 | 627 | R | <ul style="list-style-type: none"> <li>○ Age (continuous) = 1.09, 1.07 – 1.12</li> <li>○ Male 1.15, 0.78 – 1.66</li> </ul>                                                                                                                                                                                                                                                              |                                                                                                                  |  |
| Bielza et al., 2021 (Spain)     | ≥70                     | 630 | R | <ul style="list-style-type: none"> <li>○ Age (continuous)=1.01, 0.98 – 1.03</li> <li>○ Male 1.56, 1.07 – 2.28</li> <li>○ Hypertension 1.10, 0.79 – 1.53</li> <li>○ Chronic lung disease 0.66, 0.39 – 1.12</li> <li>○ Diabetes 1.18, 0.78 – 1.78</li> <li>○ Chronic renal disease 1.39, 0.84 – 2.32</li> <li>○ Obesity 1.69, 0.85 – 3.35</li> <li>○ Smoking 0.90, 0.31 – 2.63</li> </ul> |                                                                                                                  |  |
| Bode et al., 2020 (USA)         |                         | 570 | R | <ul style="list-style-type: none"> <li>○ Diabetes 6.10, 3.62 – 20.28</li> </ul>                                                                                                                                                                                                                                                                                                         |                                                                                                                  |  |
| Boero et al., 2020 (Italy)      | Mean<br>67.7<br>SD 14.4 | 274 | R |                                                                                                                                                                                                                                                                                                                                                                                         | <ul style="list-style-type: none"> <li>○ Male 1.25, 0.73 – 2.14</li> <li>○ Cancer 1.45, 0.58 – 3.66</li> </ul>   |  |
| Bolouri et al., 2021 (USA)      |                         | 59  | P |                                                                                                                                                                                                                                                                                                                                                                                         | <ul style="list-style-type: none"> <li>○ Male 1.33, 0.94 – 2.67</li> <li>○ Diabetes 2.11, 0.71 – 6.27</li> </ul> |  |

|                                          |                                   |     |   |                                                                                                                                                                                                                                                                                                                  |                                  |                                                                                                                                                                                                                                                     |
|------------------------------------------|-----------------------------------|-----|---|------------------------------------------------------------------------------------------------------------------------------------------------------------------------------------------------------------------------------------------------------------------------------------------------------------------|----------------------------------|-----------------------------------------------------------------------------------------------------------------------------------------------------------------------------------------------------------------------------------------------------|
|                                          |                                   |     |   |                                                                                                                                                                                                                                                                                                                  | ○ Hypertension 0.84, 0.29 – 2.38 |                                                                                                                                                                                                                                                     |
| Bossini et al., 2020<br>(Italy)          | Median<br>60<br>IQR 50-<br>67     | 53  | P | <ul style="list-style-type: none"> <li>○ Age&gt;60 vs ≤60 = 1.12, 1.03 – 1.24</li> <li>○ Hypertension 0.38, 0.08 – 1.3</li> <li>○ Diabetes 1.61, 0.36 – 6.48</li> <li>○ Cardiovascular disease 1.94, 0.43 – 8.15</li> </ul>                                                                                      |                                  |                                                                                                                                                                                                                                                     |
| Botta et al., 2021<br>(Netherlands)      | Median<br>67<br>IQR 59-<br>73     | 533 | R | <ul style="list-style-type: none"> <li>○ Age (continuous) = 2.19, 1.65 – 2.90</li> <li>○ Male 2.16, 1.24 – 3.78</li> <li>○ Hypertension 1.16, 0.72 – 1.88</li> <li>○ Diabetes 1.58, 0.93 – 2.67</li> <li>○ Chronic kidney disease 0.89, 0.30 – 2.61</li> <li>○ Chronic lung disease 1.70, 0.86 – 3.36</li> </ul> |                                  |                                                                                                                                                                                                                                                     |
| Bottio et al., 2021<br>(Italy)           | Mean<br>61.8<br>SD 14.5           | 47  | R | <ul style="list-style-type: none"> <li>○ Male 1.92, 0.43 – 6.09</li> <li>○ Obesity 1.52, 0.31 – 7.51</li> <li>○ Hypertension 0.67, 0.18 – 2.40</li> <li>○ Diabetes 5.56, 1.11 – 27.89</li> <li>○ Smoking 0.85, 0.19 – 3.84</li> <li>○ Cancer 1.67, 0.25 – 11.26</li> </ul>                                       |                                  |                                                                                                                                                                                                                                                     |
| Brandão Neto RA et al., 2021<br>(Brazil) | Mean<br>=59.2<br>years<br>(±16.8) | 506 | P | <ul style="list-style-type: none"> <li>○ Male 0.90, 0.61 – 1.32</li> <li>○ Hypertension 1.13, 0.77 – 1.66</li> <li>○ Diabetes 1.34, 0.91 – 1.98</li> <li>○ Smoking 1.02, 0.67 – 1.55</li> </ul>                                                                                                                  |                                  | <ul style="list-style-type: none"> <li>○ Male 1.14, 0.81 – 1.64</li> <li>○ Hypertension 1.06, 0.75 – 1.52</li> <li>○ Diabetes 1.57, 1.08 – 2.28</li> <li>○ Smoking 0.87, 0.59 – 1.29</li> <li>○ Cardiovascular disease 1.11, 0.56 – 2.16</li> </ul> |

|                                       |                           |        |   |                                                                                                                                                                                                                         |                                                                                                                                                                                                                                                                                                                                                        |                                                                                                                                                                     |
|---------------------------------------|---------------------------|--------|---|-------------------------------------------------------------------------------------------------------------------------------------------------------------------------------------------------------------------------|--------------------------------------------------------------------------------------------------------------------------------------------------------------------------------------------------------------------------------------------------------------------------------------------------------------------------------------------------------|---------------------------------------------------------------------------------------------------------------------------------------------------------------------|
|                                       |                           |        |   | <ul style="list-style-type: none"> <li>○ Cardiovascular disease 1.32, 0.67 – 2.62</li> <li>○ Chronic lung disease 5.39, 1.84 – 15.79</li> <li>○ Asthma 1.69, 0.73 – 3.90</li> <li>○ Cancer 2.96, 1.53 – 5.73</li> </ul> |                                                                                                                                                                                                                                                                                                                                                        | <ul style="list-style-type: none"> <li>○ Chronic lung disease 2.82, 0.78 – 10.12</li> <li>○ Asthma 0.67, 0.28 – 1.58</li> <li>○ Cancer 0.63, 0.33 – 1.21</li> </ul> |
| Bravi et al., 2020 (Italy)            | Mean 58                   | 1603   | P |                                                                                                                                                                                                                         | <ul style="list-style-type: none"> <li>○ Male 1.76, 1.40 – 2.23</li> <li>○ Diabetes 1.52, 1.05 – 2.18</li> <li>○ Hypertension 1.10, 0.8 – 1.47</li> <li>○ Cardiovascular disease 1.88, 1.32 – 2.70</li> <li>○ Cancer 1.26, 0.81 – 1.95</li> <li>○ Chronic lung disease 1.88, 1.11 – 3.20</li> <li>○ Chronic renal disease 1.58, 0.90 – 2.76</li> </ul> |                                                                                                                                                                     |
| Brenner et al., 2020 (USA)            | Medin 41                  | 525    | R | <ul style="list-style-type: none"> <li>○ Age (continuous) = 1.07, 1.03 – 1.11</li> <li>○ Male 2.78, 0.76 – 10.14</li> <li>○ Smoking 1.47, 0.12 – 17.53</li> </ul>                                                       |                                                                                                                                                                                                                                                                                                                                                        |                                                                                                                                                                     |
| Brouns et al., 2020 (Netherlands)     | Mean 85<br>SD 8.1         | 101    | R | <ul style="list-style-type: none"> <li>○ Age (continuous) = 1.04, 0.39 – 2.77</li> <li>○ Male 4.79, 1.74 – 13.18</li> <li>○ Hypertension 0.54, 0.22- 1.37</li> </ul>                                                    |                                                                                                                                                                                                                                                                                                                                                        |                                                                                                                                                                     |
| Bruggemann et al., 2020 (Netherlands) | Mean 68<br>SD 11.7        | 24     | R |                                                                                                                                                                                                                         |                                                                                                                                                                                                                                                                                                                                                        | ○ Male 2.83, 0.56 – 14.38                                                                                                                                           |
| Byeon et al., 2021 (Korea)            |                           | 12,464 | R | ○ Male 1.53, 1.22 – 1.92                                                                                                                                                                                                |                                                                                                                                                                                                                                                                                                                                                        |                                                                                                                                                                     |
| Cabello et al., 2021 (Spain)          | Median 46<br>IQR 6.5-16.8 | 63     | R |                                                                                                                                                                                                                         | <ul style="list-style-type: none"> <li>○ Hypertension 5.09, 1.34 – 19.02</li> <li>○ Diabetes 6.14, 1.01 – 37.21</li> <li>○ Obesity 5.38, 1.13 – 25.64</li> <li>○ Smoking 8.23, 2.07 – 32.68</li> </ul>                                                                                                                                                 |                                                                                                                                                                     |

|                                      |                        |      |    |                                                                                                                                                                                                                                                                                                                  |                                                                                                                                                                                                                                                                                                              |                                                                                                                                                                 |
|--------------------------------------|------------------------|------|----|------------------------------------------------------------------------------------------------------------------------------------------------------------------------------------------------------------------------------------------------------------------------------------------------------------------|--------------------------------------------------------------------------------------------------------------------------------------------------------------------------------------------------------------------------------------------------------------------------------------------------------------|-----------------------------------------------------------------------------------------------------------------------------------------------------------------|
| Cabezudo-García et al., 2020 (spain) |                        | 1537 | CS | <ul style="list-style-type: none"> <li>○ Age (continuous) =1.07, 1.04 – 1.09)</li> <li>○ Male 1.39, 0.79 – 2.44</li> <li>○ Hypertension 2.96, 1.56 – 5.62</li> <li>○ Diabetes 1.54, 0.85 – 2.81</li> <li>○ Cardiovascular disease 2.48, 1.38 – 4.46</li> <li>○ Chronic lung disease 1.58, 0.85 – 2.95</li> </ul> |                                                                                                                                                                                                                                                                                                              |                                                                                                                                                                 |
| Cai et al., 2021 (China)             | Median 63<br>IQR 51-70 | 2424 | R  | <ul style="list-style-type: none"> <li>○ Cancer 1.93, 0.49 – 7.49</li> </ul>                                                                                                                                                                                                                                     |                                                                                                                                                                                                                                                                                                              |                                                                                                                                                                 |
| Cai et al., 2020 (China)             |                        | 383  | P  |                                                                                                                                                                                                                                                                                                                  | <ul style="list-style-type: none"> <li>○ Male 2.34, 1.44 – 3.81</li> <li>○ Diabetes 4.28, 1.78 – 10.28</li> <li>○ Hypertension 2.28, 1.25 – 4.14</li> <li>○ Cardiovascular disease 3.49, 1.71 – 7.12</li> <li>○ Liver disease 1.07, 0.38 – 3.04</li> <li>○ Chronic lung disease 2.39, 1.13 – 5.06</li> </ul> |                                                                                                                                                                 |
| Cai et al., 2020 (China)             |                        | 96   | R  |                                                                                                                                                                                                                                                                                                                  |                                                                                                                                                                                                                                                                                                              | <ul style="list-style-type: none"> <li>○ Male 1.36, 0.59 – 3.11</li> <li>○ Age (continuous) = 1.04, 1.01 – 1.07</li> <li>○ Smoking 1.04, 0.23 – 4.63</li> </ul> |
| Cai et al., 2020 (China)             |                        | 941  | R  | <ul style="list-style-type: none"> <li>○ Male (HR) 0.90, 0.50 – 1.63</li> <li>○ Hypertension (HR) 1.89, 1.04 – 3.45</li> <li>○ Diabetes (HR) 0.67, 0.32 – 1.39</li> <li>○ Cardiovascular disease (HR) 0.42, 0.18 – 0.96</li> </ul>                                                                               |                                                                                                                                                                                                                                                                                                              |                                                                                                                                                                 |



|                                        |                               |     |   |                                                                                                                                                                                                                                                                                                                                                                                                   |                                                                                                                                                                                                                                                                                        |                                                                                                                                                                                                                                                   |
|----------------------------------------|-------------------------------|-----|---|---------------------------------------------------------------------------------------------------------------------------------------------------------------------------------------------------------------------------------------------------------------------------------------------------------------------------------------------------------------------------------------------------|----------------------------------------------------------------------------------------------------------------------------------------------------------------------------------------------------------------------------------------------------------------------------------------|---------------------------------------------------------------------------------------------------------------------------------------------------------------------------------------------------------------------------------------------------|
|                                        |                               |     |   | <ul style="list-style-type: none"> <li>○ Cerebrovascular disease (HR) 0.75, 0.30 – 1.87</li> <li>○ Chronic renal disease (HR) 3.17, 1.48 – 6.80</li> <li>○ Chronic lung disease (HR) 0.40, 0.15 – 1.06</li> </ul>                                                                                                                                                                                 |                                                                                                                                                                                                                                                                                        |                                                                                                                                                                                                                                                   |
| Caillard et al., 2020 (France)         | Median 62<br>IQR 27.8 – 140.6 | 306 | R | <ul style="list-style-type: none"> <li>○ Age &gt;60 vs ≤60 = 3.93, 2.27 – 6.79</li> <li>○ Male 0.96, 0.60 – 1.53</li> <li>○ Hypertension 1.66, 0.99 – 2.79</li> <li>○ Cardiovascular disease 2.38, 1.51 – 3.76</li> <li>○ Chronic respiratory disease 0.90, 0.47 – 1.71</li> <li>○ Diabetes 1.86, 1.18 – 2.93</li> <li>○ Cancer 0.85, 0.41 – 1.81</li> <li>○ Smoking 1.25, 0.56 – 2.82</li> </ul> |                                                                                                                                                                                                                                                                                        |                                                                                                                                                                                                                                                   |
| Çalık Başaran N et al., 2021a (Turkey) | Median 45.5<br>IQR 19-92      | 174 | P |                                                                                                                                                                                                                                                                                                                                                                                                   | <ul style="list-style-type: none"> <li>○ Age ≥65 vs &lt;65 = 4.15, 1.64 – 10.52</li> <li>○ Male 2.32, 1.02 – 5.26</li> <li>○ Hypertension 2.47, 1.03 – 5.94</li> <li>○ Diabetes 3.57, 1.43 – 8.89</li> <li>○ Smoking 1.52, 0.69 – 3.35</li> <li>○ Alcohol 3.31, 1.29 – 8.46</li> </ul> |                                                                                                                                                                                                                                                   |
| Caliskan et al., 2020 (Turkey)         | Adults                        | 565 | R | <ul style="list-style-type: none"> <li>○ Smoking 13.01, 5.05 – 33.48</li> <li>○ Age (continuous) 1.08, 1.05 – 1.11</li> <li>○ Chronic lung disease 3.21, 1.22 – 8.43</li> <li>○ Diabetes 1.04, 0.44 – 2.42</li> </ul>                                                                                                                                                                             |                                                                                                                                                                                                                                                                                        | <ul style="list-style-type: none"> <li>○ Smoking 5.10, 2.38 – 10.92</li> <li>○ Age 1.06, 1.04 – 1.08</li> <li>○ Chronic lung disease 2.77, 1.12 – 6.82</li> <li>○ Diabetes 1.15, 0.55 – 2.39</li> <li>○ Hypertension 1.57, 0.82 – 3.01</li> </ul> |

|                                      |                 |      |   |                                                                                                                                                                                                                                                                                                                                                           |  |                                            |
|--------------------------------------|-----------------|------|---|-----------------------------------------------------------------------------------------------------------------------------------------------------------------------------------------------------------------------------------------------------------------------------------------------------------------------------------------------------------|--|--------------------------------------------|
|                                      |                 |      |   | <ul style="list-style-type: none"> <li>○ Hypertension 1.45, 0.69 – 3.07</li> <li>○ Chronic renal disease 3.98, 0.93 – 16.89</li> </ul>                                                                                                                                                                                                                    |  | ○ Chronic renal disease 3.68, 0.98 – 13.81 |
| Cao J et al., 2020 (China)           | Adult Median 54 | 102  | R | <ul style="list-style-type: none"> <li>○ Male 3.65, 1.10 – 12.12</li> <li>○ Hypertension 7.33, 2.37 – 22.65</li> <li>○ Diabetes 8.72, 2.27 – 33.45</li> <li>○ Cerebrovascular disease 5.85, 1.07 – 31.98</li> <li>○ Cardiovascular disease 8.89, 1.36 – 58.08</li> <li>○ Chronic respiratory disease 4.05, 1.00 – 16.33</li> </ul>                        |  |                                            |
| Capdevila-Reniu et al., 2021 (Spain) | ≥80             | 159  | R | <ul style="list-style-type: none"> <li>○ Male 1.52, 0.78 – 2.94</li> <li>○ Diabetes 1.25, 0.61 – 2.67</li> <li>○ Chronic lung disease 0.58, 0.18 – 1.88</li> <li>○ Cerebrovascular disease 1.31, 0.48 – 3.61</li> <li>○ Cancer 2.01, 0.79 – 5.08</li> <li>○ Chronic kidney disease 1.40, 0.67 – 2.93</li> <li>○ Hypertension 0.86, 0.40 – 1.83</li> </ul> |  |                                            |
| Cariou et al., 2020 (France)         | Mean 69.8 SD 13 | 1317 | P | <ul style="list-style-type: none"> <li>○ Male 1.25, 0.85 – 1.81</li> <li>○ Hypertension 1.82, 1.11 – 2.8</li> <li>○ Smoking 1.20, 0.49 – 2.93</li> </ul>                                                                                                                                                                                                  |  |                                            |
| Carubbi et al., 2021 (Italy)         | Median 65       | 61   | R | <ul style="list-style-type: none"> <li>○ Male 0.83, 0.12 – 5.41</li> </ul>                                                                                                                                                                                                                                                                                |  |                                            |
| Catteau et al., 2020 (Belgium)       |                 | 8910 | P | <ul style="list-style-type: none"> <li>○ Age ≥65 vs &lt;65 = 7.74, 6.63 – 9.04</li> </ul>                                                                                                                                                                                                                                                                 |  |                                            |

|                                 |                        |      |    |                                                                                                                                                                                                                                                                                                                                                                  |                                                                                                                                                                                                                                                                                                                            |                                                                                                                                                                                                                                                                                                                                                                                               |
|---------------------------------|------------------------|------|----|------------------------------------------------------------------------------------------------------------------------------------------------------------------------------------------------------------------------------------------------------------------------------------------------------------------------------------------------------------------|----------------------------------------------------------------------------------------------------------------------------------------------------------------------------------------------------------------------------------------------------------------------------------------------------------------------------|-----------------------------------------------------------------------------------------------------------------------------------------------------------------------------------------------------------------------------------------------------------------------------------------------------------------------------------------------------------------------------------------------|
|                                 |                        |      |    | <ul style="list-style-type: none"> <li>○ Male 1.15, 1.04 – 1.28</li> <li>○ Cardiovascular disease 2.46, 2.23 – 2.73</li> <li>○ Diabetes 1.50, 1.34 – 1.68</li> <li>○ Chronic renal disease 2.46, 2.16 – 2.81</li> <li>○ Chronic liver disease 1.77, 1.34 – 2.33</li> <li>○ Chronic lung disease 1.49, 1.31 – 1.70</li> <li>○ Cancer 1.08, 0.80 – 1.46</li> </ul> |                                                                                                                                                                                                                                                                                                                            |                                                                                                                                                                                                                                                                                                                                                                                               |
| Cattelan et al., 2020 (Italy)   | Median 62              | 303  | R  |                                                                                                                                                                                                                                                                                                                                                                  |                                                                                                                                                                                                                                                                                                                            | <ul style="list-style-type: none"> <li>○ Male 2.69, 1.45 – 4.99</li> <li>○ Hypertension 3.34, 1.86 – 6.02</li> <li>○ Diabetes 1.76, 0.97 – 3.20</li> <li>○ Cardiovascular disease 0.72, 0.32 – 1.63</li> <li>○ Chronic lung disease 1.27, 0.51 – 3.17</li> <li>○ Cancer 0.79, 0.28 – 2.18</li> <li>○ Chronic kidney disease 0.84, 0.23 – 3.06</li> <li>○ Obesity 0.92, 0.44 – 1.91</li> </ul> |
| Cekerevac et al., 2021 (Serbia) |                        | 127  | CS |                                                                                                                                                                                                                                                                                                                                                                  | <ul style="list-style-type: none"> <li>○ Male 1.16, 0.55 – 2.47</li> <li>○ Smoking 0.52, 0.18 – 1.47</li> <li>○ Hypertension 3.78, 1.81 – 7.91</li> <li>○ Diabetes 1.39, 0.61 – 3.19</li> <li>○ Obesity 1.10, 0.43 – 2.84</li> <li>○ Chronic lung disease 0.81, 0.15 – 4.15</li> <li>○ Cancer 0.81, 0.11 – 5.92</li> </ul> |                                                                                                                                                                                                                                                                                                                                                                                               |
| Cen Y et al., 2020 (China)      | Median 69<br>IQR 49-68 | 1007 | p  | <ul style="list-style-type: none"> <li>○ Age <math>\geq 65</math> vs <math>&lt;65</math> = 6.62, 3.14 – 13.97</li> <li>○ Male 2.81, 1.42 – 5.53</li> <li>○ Hypertension 2.48, 1.34 – 4.59</li> </ul>                                                                                                                                                             | <ul style="list-style-type: none"> <li>○ Age <math>\geq 65</math> vs <math>&lt;65</math> = 5.00, 3.66 – 6.83</li> <li>○ Male 1.69, 1.26 – 2.28</li> <li>○ Hypertension 2.90, 2.12 – 3.96</li> <li>○ Diabetes 3.80, 2.51 – 5.74</li> </ul>                                                                                  |                                                                                                                                                                                                                                                                                                                                                                                               |

|                            |        |     |   |                                                                                                                                                                                                                                                                                                                                                                                                                                                                                                      |                                                                                                                                                 |  |
|----------------------------|--------|-----|---|------------------------------------------------------------------------------------------------------------------------------------------------------------------------------------------------------------------------------------------------------------------------------------------------------------------------------------------------------------------------------------------------------------------------------------------------------------------------------------------------------|-------------------------------------------------------------------------------------------------------------------------------------------------|--|
|                            |        |     |   | <ul style="list-style-type: none"> <li>○ Diabetes 3.10, 1.54 – 6.21</li> <li>○ Chronic lung disease 2.25, 0.76 – 6.59</li> <li>○ Cardiovascular disease 5.01, 2.35 – 10.68</li> <li>○ Chronic renal disease 3.86, 0.83 – 17.85</li> <li>○ Cerebrovascular disease 3.21, 0.92 – 11.17</li> <li>○ Smoking 0.24, 0.03 – 1.76</li> </ul>                                                                                                                                                                 | <ul style="list-style-type: none"> <li>○ Chronic lung disease 6.37, 3.29 – 12.31</li> <li>○ Cardiovascular disease 2.36, 1.35 – 4.11</li> </ul> |  |
| Chand et al., 2020 (USA)   | Adults | 300 | R | <ul style="list-style-type: none"> <li>○ Male 1.83, 1.14 – 2.92</li> <li>○ Age <math>\geq 60</math> vs <math>&lt; 60</math> = 2.15, 1.35 – 3.42</li> <li>○ Smoking 2.03, 1.15 – 3.57</li> <li>○ Alcohol 0.97, 0.45 – 2.09</li> <li>○ Diabetes 1.16, 0.74 – 1.84</li> <li>○ Hypertension 1.86, 1.15 – 3.03</li> <li>○ Asthma 0.67, 0.34 – 1.32</li> <li>○ Cardiovascular disease 1.72, 0.62 – 4.78</li> <li>○ Chronic kidney disease 1.21, 0.61 – 2.37</li> <li>○ Cancer 2.49, 0.86 – 7.17</li> </ul> |                                                                                                                                                 |  |
| Chang et al., 2020 (Korea) | Adults | 106 | R | <ul style="list-style-type: none"> <li>○ Male 2.02, 0.84 – 4.82</li> <li>○ Hypertension 1.89, 0.78 – 4.58</li> <li>○ Diabetes 2.66, 1.12 – 6.34</li> <li>○ Chronic kidney disease 0.40, 0.11 – 1.53</li> </ul>                                                                                                                                                                                                                                                                                       |                                                                                                                                                 |  |

|                              |                           |      |   |                                                                                                                                                                                                                                                                                                                                                         |                                                                                              |                                                                    |
|------------------------------|---------------------------|------|---|---------------------------------------------------------------------------------------------------------------------------------------------------------------------------------------------------------------------------------------------------------------------------------------------------------------------------------------------------------|----------------------------------------------------------------------------------------------|--------------------------------------------------------------------|
|                              |                           |      |   | ○ Cancer 2.18, 0.54 – 8.76                                                                                                                                                                                                                                                                                                                              |                                                                                              |                                                                    |
| Chaudhry et al., 2020 (USA)  | Adults                    | 40   | R |                                                                                                                                                                                                                                                                                                                                                         | ○ Male 1.61, 0.28 – 9.23<br>○ Smoking 1.16, 0.11 – 12.13<br>○ Hypertension 1.61, 0.28 – 9.23 |                                                                    |
| Chen C et al., 2021 (China)  | Median<br>68              | 2297 | R | ○ Hypertension 1.98, 1.43 – 2.75                                                                                                                                                                                                                                                                                                                        |                                                                                              |                                                                    |
| Chen J et al., 2020a (China) | Median<br>62<br>IQR 49-69 | 3309 | R | ○ Age >45 vs ≤45 = 9.08, 4.44-18.59<br>○ Male 2.27, 1.72 – 2.94<br>○ Hypertension 1.14, 0.87 – 1.50<br>○ Diabetes 0.97, 0.70 – 1.36<br>○ Cardiovascular disease 1.41, 0.94 – 2.13<br>○ Cerebrovascular disease 1.25, 0.73 – 2.13<br>○ Cancer 3.17, 1.84 – 5.46<br>○ Chronic renal disease 2.85, 1.42 – 5.73<br>○ Chronic lung disease 1.72, 0.80 – 3.71 | ○ Male 1.14, 0.97 – 1.34                                                                     |                                                                    |
| Chen J et al., 2020b (China) | Median<br>51<br>IQR 36-64 | 249  | R |                                                                                                                                                                                                                                                                                                                                                         |                                                                                              | ○ Age (continuous) = 1.06, 1.00 – 1.12<br>○ Male 3.38, 0.77 – 14.9 |
| Chen L et al., 2020 (China)  | Median<br>55<br>IQR 36-68 | 792  | R | ○ Male 0.81, 0.49 – 1.34<br>○ Hypertension 3.00, 1.81 – 4.96<br>○ Diabetes 3.24, 1.91 – 5.50<br>○ Chronic lung disease 4.02, 1.40 – 11.53                                                                                                                                                                                                               |                                                                                              |                                                                    |

|                                 |                           |     |   |                                                                                                                                                                                                                                                   |                                                                                              |  |
|---------------------------------|---------------------------|-----|---|---------------------------------------------------------------------------------------------------------------------------------------------------------------------------------------------------------------------------------------------------|----------------------------------------------------------------------------------------------|--|
|                                 |                           |     |   | ○ Chronic kidney disease<br>2.65, 0.96 – 7.28                                                                                                                                                                                                     |                                                                                              |  |
| Rajter et al., 2021<br>(US)     | 280                       |     | R | ○ Male 2.38, 0.59 – 4.16<br>○ Smoking 3.94, 0.71 – 17.32<br>○ Diabetes 1.17, 0.39 – 3.55<br>○ Hypertension 0.72, 0.17 – 3.08                                                                                                                      |                                                                                              |  |
|                                 |                           |     |   |                                                                                                                                                                                                                                                   | ○                                                                                            |  |
| Chen Q et al., 2020b<br>(China) | Mean<br>47.5              | 145 | R |                                                                                                                                                                                                                                                   | ○ Male 0.94, 0.46 – 1.93<br>○ Hypertension 1.81, 0.71 – 4.62<br>○ Smoking 0.56, 0.15 – 2.10  |  |
| Chen T et al., 2020<br>(China)  | Median<br>54<br>IQR 41-68 | 203 | R | ○ Male 5.33, 1.32 – 21.52<br>○ Hypertension 1.80, 0.57 – 5.61<br>○ Diabetes 1.47, 0.39 – 5.50<br>○ Cardiovascular disease<br>2.86, 0.74 – 11.06<br>○ Cerebrovascular disease<br>1.16, 0.24 – 5.94                                                 |                                                                                              |  |
| Chen Y et al., 2020<br>(china)  | Median<br>56<br>IQR 39-67 | 904 | R | ○ Male 2.63, 1.63 – 4.16<br>○ Diabetes 2.51, 1.53 – 4.13<br>○ Hypertension 3.48, 2.24 – 5.40<br>○ Cardiovascular disease<br>8.29, 5.02 – 13.68<br>○ Chronic kidney disease<br>13.91, 7.23 – 26.80<br>○ Chronic lung disease<br>4.38, 1.74 – 11.03 |                                                                                              |  |
| Chen Z et al., 2020<br>(China)  | Median<br>46              | 836 | R |                                                                                                                                                                                                                                                   | ○ Male 1.71, 1.21 – 2.44<br>○ Hypertension 2.41, 1.68 – 3.43<br>○ Diabetes 1.06, 0.70 – 1.59 |  |

|                             |                        |     |   |                                                                                                                                                                                                                                                                                                                                                               |                                                                                                                                                                                                                                                                                                                                                                                                                                                      |  |
|-----------------------------|------------------------|-----|---|---------------------------------------------------------------------------------------------------------------------------------------------------------------------------------------------------------------------------------------------------------------------------------------------------------------------------------------------------------------|------------------------------------------------------------------------------------------------------------------------------------------------------------------------------------------------------------------------------------------------------------------------------------------------------------------------------------------------------------------------------------------------------------------------------------------------------|--|
|                             | IQR 36-57              |     |   |                                                                                                                                                                                                                                                                                                                                                               | <ul style="list-style-type: none"><li>○ Chronic liver disease 1.51, 0.94 – 2.41</li><li>○ Chronic renal disease 2.66, 1.08 – 6.51</li><li>○ Cerebrovascular disease 2.91, 1.49 – 5.69</li><li>○ Cardiovascular disease 3.15, 1.90 – 5.23</li></ul>                                                                                                                                                                                                   |  |
| Cheng et al., 2020 (China)  | Median 49<br>IQR37-61  | 252 | R |                                                                                                                                                                                                                                                                                                                                                               | <ul style="list-style-type: none"><li>○ Age &gt;=60 vs &lt;60 = 6.82, 3.52 – 13.21</li><li>○ Male 1.21, 0.65 – 2.24</li><li>○ Hypertension 1.45, 0.64 – 3.19</li><li>○ Diabetes 1.74, 0.58 – 5.02</li><li>○ Cardiovascular disease 1.33, 0.32 – 6.00</li><li>○ Cerebrovascular disease 7.96, 0.75 – 173.32</li><li>○ Liver disease 4.02, 0.73 – 22.30</li><li>○ Chronic lung disease 1.29, 0.19 – 5.81</li><li>○ Cancer 2.57, 0.29 – 54.99</li></ul> |  |
| Chilimuri et al.,2020 (USA) | Median 63<br>IQR 19-97 | 375 | R | <ul style="list-style-type: none"><li>○ Male 1.37, 0.79 – 2.37</li><li>○ Hypertension 1.46, 0.82 – 2.62</li><li>○ Diabetes 1.58, 0.94 – 2.65</li><li>○ Cardiovascular disease 1.56, 0.78 – 3.11</li><li>○ Chronic lng disease 1.22, 0.71 – 2.11</li><li>○ Chronic renal disease 1.33, 0.63 – 2.77</li><li>○ Chronic liver disease 2.19, 0.83 – 5.79</li></ul> |                                                                                                                                                                                                                                                                                                                                                                                                                                                      |  |
| Choron et al., 2021 (USA)   | Median 64              | 103 | R | <ul style="list-style-type: none"><li>○ Male 2.61, 1.01 – 2.26</li><li>○ Chronic lung disease 1.12, 0.31 – 4.12</li></ul>                                                                                                                                                                                                                                     |                                                                                                                                                                                                                                                                                                                                                                                                                                                      |  |

|                               |                           |      |   |                                                                                                                                                                                                                                                                                                                                                                                        |  |                                                                                                                                                                                                                                                                                                               |
|-------------------------------|---------------------------|------|---|----------------------------------------------------------------------------------------------------------------------------------------------------------------------------------------------------------------------------------------------------------------------------------------------------------------------------------------------------------------------------------------|--|---------------------------------------------------------------------------------------------------------------------------------------------------------------------------------------------------------------------------------------------------------------------------------------------------------------|
|                               |                           |      |   | <ul style="list-style-type: none"> <li>○ Diabetes 0.78, 0.35 – 1.72</li> <li>○ Hypertension 1.04, 0.45 – 2.36</li> <li>○ Chronic kidney disease 0.59, 0.17 – 1.99</li> </ul>                                                                                                                                                                                                           |  |                                                                                                                                                                                                                                                                                                               |
| Choudhuri et al., 2020 (USA)  | Mean<br>65.2              | 1044 | R | <ul style="list-style-type: none"> <li>○ Male 1.88, 1.37 – 2.59</li> <li>○ Diabetes 1.38, 1.00 – 1.90</li> <li>○ Hypertension 1.03, 0.72 – 1.47</li> </ul>                                                                                                                                                                                                                             |  |                                                                                                                                                                                                                                                                                                               |
| Ciceri et al., 2020 (Italy)   | Median<br>65<br>IQR 56-75 | 500  | R | <ul style="list-style-type: none"> <li>○ Age <math>\geq 65</math> vs <math>&lt;65</math> = 6.08, 3.47 – 10.65</li> <li>○ Male 1.05, 0.62 – 1.76</li> <li>○ Hypertension 2.77, 1.71 – 4.52</li> <li>○ Diabetes 1.71, 0.97 – 3.03</li> <li>○ Chronic lung disease 10.43, 3.95 – 27.52</li> <li>○ Chronic kidney disease 4.29, 2.29 – 8.04</li> <li>○ Cancer 3.62, 1.51 – 8.63</li> </ul> |  |                                                                                                                                                                                                                                                                                                               |
| Cilloniz et al., 2021 (Spain) | Mean<br>57.7              | 240  | R |                                                                                                                                                                                                                                                                                                                                                                                        |  | <ul style="list-style-type: none"> <li>○ Male 1.92, 1.05 – 2.01</li> <li>○ Chronic lung disease 1.29, 0.61 – 2.71</li> <li>○ Cardiac disease 1.03, 0.51 – 2.10</li> <li>○ Hypertension 1.01, 0.59 – 1.69</li> <li>○ Diabetes 1.37, 0.65 – 2.86</li> <li>○ Chronic kidney disease 1.15, 0.52 – 2.51</li> </ul> |
| Cinar et al., 2021 (Turkey)   | Mean<br>55.3<br>SD 12.8   | 294  | R | <ul style="list-style-type: none"> <li>○ Male 3.94, 1.56 – 9.95</li> <li>○ Diabetes 4.24, 1.95 – 9.22</li> <li>○ Chronic lung disease 4.95, 2.08 – 11.80</li> </ul>                                                                                                                                                                                                                    |  |                                                                                                                                                                                                                                                                                                               |



|                                                                    |                               |      |   |                                                                                                                                                                                                                      |                                                                                                                                                                                            |                                                                                                                                                                                |
|--------------------------------------------------------------------|-------------------------------|------|---|----------------------------------------------------------------------------------------------------------------------------------------------------------------------------------------------------------------------|--------------------------------------------------------------------------------------------------------------------------------------------------------------------------------------------|--------------------------------------------------------------------------------------------------------------------------------------------------------------------------------|
|                                                                    |                               |      |   | ○ Chronic renal failure<br>7.34, 2.17 – 28.84                                                                                                                                                                        |                                                                                                                                                                                            |                                                                                                                                                                                |
| Cizmecioglu et al.,<br>2020 (Turkey)                               | Median<br>45                  | 33   | R |                                                                                                                                                                                                                      | ○ Males 1.54, 0.36 – 6.44<br>○ Diabetes 1.25, 0.27 – 5.76<br>○ Hypertension 1.00, 0.22 – 4.50<br>○ Cardiovascular disease 1.90, 0.23 – 15.58<br>○ Chronic lung diseases 0.86, 0.07 – 10.65 |                                                                                                                                                                                |
| Collaborative GMR et<br>al., 2021<br>(UK)                          | Median<br>74<br>IQR 54-<br>83 | 5711 | R |                                                                                                                                                                                                                      |                                                                                                                                                                                            | ○ Male 1.22, 0.97 – 1.52<br>○ Diabetes 1.15, 0.92 – 1.43<br>○ Cardiovascular disease 1.17, 0.94 – 1.47<br>○ Chronic lung disease 1.06, 0.84 – 1.34<br>○ Cancer 1.14, 0.81-1.60 |
| COVID-ICU group,<br>2020 ( France,<br>Belgium, and<br>Switzerland) | Median<br>63<br>IQR 54-<br>71 | 4643 | P | ○ Male 1.11, 0.95 – 1.29<br>○ Smoking 1.18, 0.85 – 1.62<br>○ Hypertension 1.49, 1.31 – 1.71<br>○ Diabetes 1.76, 1.53 – 2.03                                                                                          |                                                                                                                                                                                            |                                                                                                                                                                                |
| Covino et al., 2021<br>(Italy)                                     | ≥60                           | 210  | R | ○ Male 1.05, 0.52 – 2.13<br>○ Hypertension 1.65, 0.81 – 3.36<br>○ Diabetes 0.66, 0.21 – 2.03<br>○ Chronic lung disease 1.98, 0.71 – 5.58<br>○ Chronic renal disease 5.96, 2.53 - 14.02<br>○ Cancer 1.00, 0.27 – 3.71 |                                                                                                                                                                                            |                                                                                                                                                                                |
| Covino et al., 2020a<br>(Italy)                                    | ≥80                           | 69   | R | ○ Male 0.91, 0.33 – 2.49<br>○ Cardiovascular disease 1.00, 0.33 – 2.69                                                                                                                                               |                                                                                                                                                                                            |                                                                                                                                                                                |

|                              |                        |      |   |                                                                                                                                                                                                                                                                                                                                                           |  |                                                                                                                                                                                                                                                                                                                                                                                                |
|------------------------------|------------------------|------|---|-----------------------------------------------------------------------------------------------------------------------------------------------------------------------------------------------------------------------------------------------------------------------------------------------------------------------------------------------------------|--|------------------------------------------------------------------------------------------------------------------------------------------------------------------------------------------------------------------------------------------------------------------------------------------------------------------------------------------------------------------------------------------------|
|                              |                        |      |   | <ul style="list-style-type: none"> <li>○ Hypertension 0.37, 0.13 – 1.04</li> <li>○ Cerebrovascular disease 2.04, 0.69 – 6.01</li> <li>○ Diabetes 0.53, 0.10 – 2.78</li> <li>○ Chronic lung disease 3.02, 0.61 – 14.81</li> <li>○ Cancer 1.00, 0.08 – 11.64</li> </ul>                                                                                     |  |                                                                                                                                                                                                                                                                                                                                                                                                |
| Covino et al., 2020b (Italy) | Median 66<br>IQR 54-78 | 334  | R | <ul style="list-style-type: none"> <li>○ Male 1.55, 0.63 – 3.80</li> <li>○ Hypertension 2.84, 1.23 – 6.57</li> <li>○ Cardiovascular disease 2.49, 1.09 – 5.67</li> <li>○ Diabetes 0.67, 0.15 – 2.96</li> <li>○ Chronic lung disease 2.38, 0.64 – 8.77</li> <li>○ Cancer 2.05, 0.43 – 9.72</li> <li>○ Chronic kidney disease 4.89, 1.21 – 19.69</li> </ul> |  | <ul style="list-style-type: none"> <li>○ Male 1.82, 0.94 – 3.49</li> <li>○ Hypertension 2.29, 1.27 – 4.11</li> <li>○ Cardiovascular disease 2.91, 1.58 – 5.32</li> <li>○ Diabetes 0.99, 0.39 – 2.51</li> <li>○ Chronic lung disease 1.84, 0.64 – 5.36</li> <li>○ Cancer 0.82, 0.18 – 3.77</li> <li>○ Chronic kidney disease 1.11, 0.23 – 5.27</li> <li>○ Obesity 5.18, 1.02 – 26.41</li> </ul> |
| Covino et al., 2020c (Italy) | Median 74              | 166  | R | <ul style="list-style-type: none"> <li>○ Males 1.41, 0.52 – 3.83</li> <li>○ Chronic lung disease 2.27, 0.50 – 10.21</li> <li>○ Cardiovascular disease 1.35, 0.60 – 3.01</li> <li>○ Diabetes 0.71, 0.19 – 2.60</li> <li>○ Obesity 0.77, 0.09 – 6.73</li> </ul>                                                                                             |  |                                                                                                                                                                                                                                                                                                                                                                                                |
| Cummings et al., 2020 (USA)  | Median 62              | 1150 | P | <ul style="list-style-type: none"> <li>○ Male (HR) 0.85, 0.57 – 1.27</li> <li>○ Hypertension (HR) = 1.58, 0.89 – 2.81</li> <li>○ Cardiovascular disease (HR) 1.76, 1.08 – 2.86</li> </ul>                                                                                                                                                                 |  |                                                                                                                                                                                                                                                                                                                                                                                                |

|                                  |                           |      |    |                                                                                                                                                                                                                                                                                                                                                  |                                                |  |
|----------------------------------|---------------------------|------|----|--------------------------------------------------------------------------------------------------------------------------------------------------------------------------------------------------------------------------------------------------------------------------------------------------------------------------------------------------|------------------------------------------------|--|
|                                  |                           |      |    | <ul style="list-style-type: none"> <li>○ Chronic lung disease (HR) 2.94, 1.48 – 5.84</li> <li>○ Chronic kidney disease (HR) 1.50, 0.92 – 2.45</li> <li>○ Diabetes (HR) 1.31, 0.81 – 2.10</li> </ul>                                                                                                                                              |                                                |  |
| Dagher et al., 2021 (USA)        | Mean<br>61.4              | 310  | R  | <ul style="list-style-type: none"> <li>○ Age <math>\geq 60</math> vs <math>&lt; 60</math> 2.46, 1.35 – 6.63</li> <li>○ Hypertension 1.36, 0.55 – 3.37</li> <li>○ Diabetes 1.73, 0.90 – 3.32</li> <li>○ Cardiovascular disease 1.16, 0.59 – 2.28</li> </ul>                                                                                       |                                                |  |
| Dai et al., 2020 (China)         | 19-88                     | 68   | R  |                                                                                                                                                                                                                                                                                                                                                  | ○ Age $\geq 60$ vs $< 60$ = 3.87, 1.28 – 11.68 |  |
| De Smet R et al., 2020 (Belgium) | Median<br>85              | 81   | R  | <ul style="list-style-type: none"> <li>○ Age (continuous) 1.13, 1.02 - 1.33</li> <li>○ Male 1.07, 0.38 – 3.05</li> </ul>                                                                                                                                                                                                                         |                                                |  |
| De Smet D et al., 2020 (Belgium) | Median<br>68<br>IQR 53-79 | 186  | R  | <ul style="list-style-type: none"> <li>○ Age (continuous) 1.09, 1.03 – 1.14</li> <li>○ Male 1.02, 0.37 – 2.84</li> <li>○ Chronic lung disease 3.61, 1.18 – 11.08</li> <li>○ Diabetes 1.16, 0.32 – 4.15</li> </ul>                                                                                                                                |                                                |  |
| De Souza et al., 2020 (Brazil)   | Mean<br>70.2              | 5145 | CS | <ul style="list-style-type: none"> <li>○ Male 0.65, 0.57 – 0.74</li> <li>○ Age <math>\geq 75</math> vs <math>&lt; 75</math> = 2.40, 2.10 – 2.74</li> <li>○ Diabetes 2.33, 1.99 – 2.74</li> <li>○ Cardiovascular disease 1.15, 0.95 – 1.39</li> <li>○ Hypertension 1.53, 1.20 – 1.94</li> <li>○ Chronic lung disease 1.27, 0.87 – 1.86</li> </ul> |                                                |  |

|                                     |             |       |   |                                                                                                                                                                                                                                                                                                                                    |                                                                                                                                                                                                |  |
|-------------------------------------|-------------|-------|---|------------------------------------------------------------------------------------------------------------------------------------------------------------------------------------------------------------------------------------------------------------------------------------------------------------------------------------|------------------------------------------------------------------------------------------------------------------------------------------------------------------------------------------------|--|
|                                     |             |       |   | <ul style="list-style-type: none"> <li>○ Chronic kidney disease 2.02, 1.27 – 3.20</li> <li>○ Obesity 1.77, 0.84 – 3.74</li> </ul>                                                                                                                                                                                                  |                                                                                                                                                                                                |  |
| De Souza et al., 2021 (India)       | Median 44   | 689   | P | <ul style="list-style-type: none"> <li>○ Age <math>\geq 65</math> vs <math>&lt;65</math> = 4.06, 2.72 – 6.05</li> <li>○ Male 1.79, 1.25 – 2.58</li> <li>○ Diabetes 3.93, 2.34 – 6.61</li> <li>○ Chronic kidney disease 1.14, 0.41 – 3.19</li> <li>○ Hypertension 4.06, 2.41 – 6.84</li> <li>○ Cancer 3.49, 0.99 – 12.23</li> </ul> |                                                                                                                                                                                                |  |
| Deeb et al., 2021 (UAE)             | Mean 51     | 1075  | R | <ul style="list-style-type: none"> <li>○ Obesity 1.69, 1.07 – 2.68</li> <li>○ Diabetes 2.38, 1.57 – 3.60</li> <li>○ Hypertension 2.42, 1.58 – 3.71</li> <li>○ Cardiovascular disease 2.84, 1.61 – 5.01</li> <li>○ Chronic lung disease 3.41, 1.72 – 6.78</li> <li>○ Cancer 5.06, 1.86 – 13.79</li> </ul>                           |                                                                                                                                                                                                |  |
| Derikx et al., 2020 (Netherlands)   | Median 62.5 | 34763 | R |                                                                                                                                                                                                                                                                                                                                    | <ul style="list-style-type: none"> <li>○ Age <math>\geq 65</math> vs <math>&lt;65</math> = 2.94, 1.06 – 8.17</li> <li>○ Male 2.03, 0.75 – 5.51</li> <li>○ Smoking 2.71, 0.84 – 8.83</li> </ul> |  |
| Di Castelnuovo et al., 2020 (Italy) | Median 67   | 3894  | R | <ul style="list-style-type: none"> <li>○ Male 1.24, 1.05 – 1.48</li> <li>○ Age <math>\geq 65</math> vs <math>&lt;65</math> = 8.71, 6.84 – 11.09</li> <li>○ Hypertension 2.38, 2.00 – 2.84</li> </ul>                                                                                                                               |                                                                                                                                                                                                |  |

|                                |              |     |     |                                                                                                                                                                                                                                                                                                                                                                        |  |                                                                                                                                                                                                                                                                                              |
|--------------------------------|--------------|-----|-----|------------------------------------------------------------------------------------------------------------------------------------------------------------------------------------------------------------------------------------------------------------------------------------------------------------------------------------------------------------------------|--|----------------------------------------------------------------------------------------------------------------------------------------------------------------------------------------------------------------------------------------------------------------------------------------------|
|                                |              |     |     | <ul style="list-style-type: none"> <li>○ Diabetes 2.06, 1.71 – 2.49</li> <li>○ Cancer 2.46, 1.96 – 3.10</li> <li>○ Chronic lung disease 2.30, 1.87 – 2.82</li> <li>○ Obesity 0.96, 0.73 – 1.28</li> <li>○ Smoking 0.93, 0.68 – 1.25</li> </ul>                                                                                                                         |  |                                                                                                                                                                                                                                                                                              |
| Di Cosimo et al., 2021 (Italy) | Median<br>61 | 231 | P/R | <ul style="list-style-type: none"> <li>○ Age <math>\geq 60</math> vs <math>&lt; 60</math> = 2.92, 1.14 – 7.50</li> <li>○ Male 1.67, 0.97 – 2.91</li> <li>○ Smoking 1.68, 0.74 – 3.7</li> </ul>                                                                                                                                                                         |  |                                                                                                                                                                                                                                                                                              |
| Du H et al., 2020 (China)      | Mean<br>61.8 | 164 | R   | <ul style="list-style-type: none"> <li>○ Male 2.46, 1.04 – 5.80</li> <li>○ Smoking 0.59, 0.13 – 2.74</li> <li>○ Hypertension 2.00, 0.88 – 4.54</li> <li>○ Diabetes 1.47, 0.56 – 3.83</li> <li>○ Obesity 2.13, 0.94 – 4.83</li> <li>○ Chronic lung disease 2.54, 0.71 – 9.08</li> <li>○ Renal disease 4.21, 1.65 – 10.72</li> <li>○ Cancer 1.44, 0.37 – 5.61</li> </ul> |  |                                                                                                                                                                                                                                                                                              |
| Du RH et al., 2020 (China)     | Mean<br>70.7 | 109 | R   |                                                                                                                                                                                                                                                                                                                                                                        |  | <ul style="list-style-type: none"> <li>○ Male 1.26, 0.56 – 2.84</li> <li>○ Age <math>\geq 65</math> vs <math>&lt; 65</math> = 0.84, 0.35 – 2.04</li> <li>○ Hypertension 0.81, 0.37 – 1.73</li> <li>○ Diabetes 1.43, 0.63 – 3.23</li> <li>○ Chronic lung disease 0.29, 0.08 – 0.97</li> </ul> |

|                                   |                               |       |   |                                                                                                                                                                                                                   |                                                                                                                                                                        |                              |
|-----------------------------------|-------------------------------|-------|---|-------------------------------------------------------------------------------------------------------------------------------------------------------------------------------------------------------------------|------------------------------------------------------------------------------------------------------------------------------------------------------------------------|------------------------------|
|                                   |                               |       |   |                                                                                                                                                                                                                   |                                                                                                                                                                        | ○ Cancer 0.35, 0.07 – 1.84   |
| Duan et al., 2020<br>(China)      |                               | 348   | R |                                                                                                                                                                                                                   | ○ Male 2.16, 0.81 – 5.78<br>○ Hypertension 3.31, 1.02 – 10.73<br>○ Diabetes 3.93, 0.79 – 19.58                                                                         |                              |
| Duarte et al., 2020<br>(Brazil)   | Adults                        | 43271 | R | ○ Age $\geq 65$ vs $<65$ = 1.3,<br>0.93 – 1.82<br>○ Male 0.84, 0.61 – 1.15<br>○ Cardiovascular disease<br>1.39, 0.93 – 2.07<br>○ Diabetes 1.14, 0.73 –<br>1.77<br>○ Chronic lung disease<br>1.03, 0.47 – 2.25     | ○                                                                                                                                                                      |                              |
| Duclos et al, 2021<br>(France)    | Mean 62                       | 57    | R | ○ Age (continuous) 1.23,<br>1.06 – 1.43<br>○ Male 1.53, 0.12 – 18.8<br>○ Hypertension 2.5, 0.66<br>– 9.51<br>○ Diabetes 0.45, 0.11 –<br>1.91<br>○ Smoking 2.71, 0.64 –<br>11.52<br>○ Obesity 1.58, 0.43 –<br>5.86 |                                                                                                                                                                        |                              |
| Nguyen et al., 2020<br>(USA)      | Mean<br>52.7                  | 442   | R |                                                                                                                                                                                                                   | ○ Age (continuous) 1.49, 1.30 –<br>1.70<br>○ Male 2.01, 1.34 – 3.04<br>○ Obesity 1.95, 1.11 – 3.42<br>○ Hypertension 1.19, 0.71 – 1.99<br>○ Diabetes 1.77, 1.03 – 3.03 |                              |
| Elamari et al., 2020<br>(Morocco) | Median<br>53<br>IQR 36-<br>64 | 133   | R | ○ Diabetes 1.86, 0.53 –<br>6.53                                                                                                                                                                                   |                                                                                                                                                                        | ○ Diabetes 3.90, 1.58 – 9.63 |
| Elhadi et al., 2021<br>(Libya)    | Median<br>69                  | 465   | P | ○ Age $\geq 60$ vs $<60$ = 2.28,<br>1.53 – 3.39                                                                                                                                                                   |                                                                                                                                                                        |                              |

|                                  |                        |       |    |                                                                                                                                                                                                                                                                                                                                                                                               |                                                                                                                             |  |
|----------------------------------|------------------------|-------|----|-----------------------------------------------------------------------------------------------------------------------------------------------------------------------------------------------------------------------------------------------------------------------------------------------------------------------------------------------------------------------------------------------|-----------------------------------------------------------------------------------------------------------------------------|--|
|                                  |                        |       |    | <ul style="list-style-type: none"> <li>○ Male 1.33, 0.92 – 1.93</li> <li>○ Diabetes 1.31, 0.90 – 1.91</li> <li>○ Cardiovascular disease 0.92, 0.58 – 1.44</li> <li>○ Hypertension 1.02, 0.70 – 1.48</li> <li>○ Chronic lung disease 0.80, 0.41 – 1.59</li> <li>○ Asthma 0.65, 0.36 – 1.16</li> <li>○ Chronic kidney disease 1.51, 0.78 – 2.91</li> <li>○ Cancer 3.41, 0.97 – 11.92</li> </ul> |                                                                                                                             |  |
| Escobar et al., 2021 (Brazil)    |                        | 50824 | CS | ○ Male 1.93, 1.69 – 2.19                                                                                                                                                                                                                                                                                                                                                                      |                                                                                                                             |  |
| Escosteguy et al., 2021 (Brazil) | Median 55              | 376   | CS | <ul style="list-style-type: none"> <li>○ Male 1.64, 1.06 – 2.53</li> <li>○ Cardiovascular disease 1.31, 0.85 – 2.04</li> <li>○ Diabetes 1.41, 0.87 – 2.29</li> <li>○ Cancer 2.58, 1.48 – 4.52</li> <li>○ Chronic lung disease 0.15, 0.04 – 0.63</li> <li>○ Chronic liver disease 4.02, 1.32 – 12.26</li> </ul>                                                                                |                                                                                                                             |  |
| Etienne et al., 2020 (Paris)     | Median 54<br>IQR 47-60 | 54    | P  |                                                                                                                                                                                                                                                                                                                                                                                               | <ul style="list-style-type: none"> <li>○ Age &gt;65 vs ≤65 = 0.92, 0.15 – 5.50</li> <li>○ Male 2.36, 0.69 – 7.97</li> </ul> |  |
| Fadini et al., 2020 (Italy)      | Mean 64.9              | 413   | R  | ○ Diabetes 1.35, 0.71 – 2.59                                                                                                                                                                                                                                                                                                                                                                  |                                                                                                                             |  |
| Falcone et al., 2020 (Italy)     | Median 70              | 315   | P  | <ul style="list-style-type: none"> <li>○ Male 2.13, 1.14 – 2.98</li> <li>○ Chronic lung disease 4.43, 2.19 – 8.96</li> </ul>                                                                                                                                                                                                                                                                  |                                                                                                                             |  |

|                               |                       |     |   |                                                                                                                                                                                                                                                                                                                           |                                                                                                                                                               |                                                                                                                                                                                                                                                                                                           |
|-------------------------------|-----------------------|-----|---|---------------------------------------------------------------------------------------------------------------------------------------------------------------------------------------------------------------------------------------------------------------------------------------------------------------------------|---------------------------------------------------------------------------------------------------------------------------------------------------------------|-----------------------------------------------------------------------------------------------------------------------------------------------------------------------------------------------------------------------------------------------------------------------------------------------------------|
|                               | IQR 57-80             |     |   | <ul style="list-style-type: none"> <li>○ Hypertension 2.41, 1.39 – 4.17</li> <li>○ Cardiovascular disease 2.86, 1.65 – 4.93</li> <li>○ Diabetes 1.42, 0.76 – 2.69</li> <li>○ Cerebrovascular disease 3.65, 1.72 – 7.78</li> <li>○ Cancer 1.38, 0.67 – 2.84</li> <li>○ Chronic kidney disease 3.76, 1.67 – 8.44</li> </ul> |                                                                                                                                                               |                                                                                                                                                                                                                                                                                                           |
| Fava et al., 2020 (Spain)     | Mean 59.7             | 104 | R | <ul style="list-style-type: none"> <li>○ Male 0.79, 0.33 – 1.90</li> <li>○ Diabetes 1.69, 0.68 – 4.21</li> <li>○ Obesity 2.24, 0.88 – 5.69</li> <li>○ Cardiovascular disease 1.81, 0.72 – 4.52</li> <li>○ Chronic lung disease 6.48, 2.08 – 20.20</li> <li>○ Cancer 5.28, 1.17 – 23.85</li> </ul>                         |                                                                                                                                                               |                                                                                                                                                                                                                                                                                                           |
| Ferguson et al., 2020 (USA)   | Median 60.4           | 72  | R |                                                                                                                                                                                                                                                                                                                           |                                                                                                                                                               | <ul style="list-style-type: none"> <li>○ Male 1.68, 0.54 – 5.54</li> <li>○ Smoking 1.34, 0.33 – 5.0</li> <li>○ Hypertension 2.60, 0.81 – 8.54</li> <li>○ Diabetes 3.65, 1.07 – 13.84</li> <li>○ Chronic renal disease 0.67, 0.06 – 3.95</li> <li>○ Cerebrovascular disease 2.46, 0.03 – 100.75</li> </ul> |
| Fernandes et al., 2021 (USA)  | Median 10<br>IQR 1-17 | 281 | R |                                                                                                                                                                                                                                                                                                                           | <ul style="list-style-type: none"> <li>○ Age (continuous) 1.09, 1.01- 1.18</li> <li>○ Obesity 3.66, 1.14 – 11.78</li> <li>○ Male 0.91, 0.45 – 1.89</li> </ul> |                                                                                                                                                                                                                                                                                                           |
| Ferrando et al., 2020 (Spain) |                       | 663 | P | <ul style="list-style-type: none"> <li>○ Age (continuous) 1.05, 1.01 – 1.09</li> </ul>                                                                                                                                                                                                                                    |                                                                                                                                                               |                                                                                                                                                                                                                                                                                                           |



|                                  |                        |      |   |                                                                                                                                                                                                                                                                                                                                                                                               |  |  |
|----------------------------------|------------------------|------|---|-----------------------------------------------------------------------------------------------------------------------------------------------------------------------------------------------------------------------------------------------------------------------------------------------------------------------------------------------------------------------------------------------|--|--|
|                                  |                        |      |   | <ul style="list-style-type: none"> <li>○ Diabetes 1.83, 0.42 – 7.83</li> <li>○ Chronic kidney disease 0.91, 0.22 – 3.69</li> <li>○ Cancer 1.86, 0.36 – 9.67</li> <li>○ Male 0.93, 0.65 – 1.32</li> <li>○ Hypertension 1.50, 1.07 – 2.09</li> <li>○ Asthma 0.69, 0.23 – 2.14</li> <li>○ Cardiovascular disease 4.64, 1.15 – 18.74</li> <li>○ Chronic lung disease 1.07, 0.48 – 2.42</li> </ul> |  |  |
| Ferrando-Vivas et al., 2021 (UK) | Median 60<br>IQR 51-68 | 9990 | R | <ul style="list-style-type: none"> <li>○ Male 1.30, 1.19 – 1.42</li> </ul>                                                                                                                                                                                                                                                                                                                    |  |  |
| Ferrari et al., 2020 (Brazil)    | Median 61              | 198  | p | <ul style="list-style-type: none"> <li>○ Age <math>\geq 60</math> vs <math>&lt;60</math> = 3.1, 1.1 – 9.7</li> <li>○ Male 1.47, 0.68 – 3.16</li> <li>○ Hypertension 1.79, 0.84 – 3.83</li> <li>○ Cardiovascular disease 2.51, 0.94 – 6.68</li> <li>○ Diabetes 3.32, 1.49 – 7.35</li> <li>○ Smoking 3.4, 1.3 – 8.6</li> </ul>                                                                  |  |  |
| Fox et al., 2020 (USA)           | Mean 66.2              | 355  | R | <ul style="list-style-type: none"> <li>○ Age (continuous) 1.03, 1.00 – 1.07</li> <li>○ Male 1.36, 0.62 – 2.99</li> <li>○ Chronic lung disease 1.15, 0.38 – 3.48</li> <li>○ Asthma 0.71, 0.07 – 6.67</li> </ul>                                                                                                                                                                                |  |  |

|                              |           |      |   |                                                                                                                                                                                                                                                                                                                                                                                           |  |  |
|------------------------------|-----------|------|---|-------------------------------------------------------------------------------------------------------------------------------------------------------------------------------------------------------------------------------------------------------------------------------------------------------------------------------------------------------------------------------------------|--|--|
|                              |           |      |   | <ul style="list-style-type: none"> <li>○ Hypertension 0.52, 0.13 – 2.02</li> <li>○ Chronic kidney disease 1.44, 0.61 – 3.40</li> </ul>                                                                                                                                                                                                                                                    |  |  |
| Foy et al., 2020 (USA)       | Mean 62   | 1641 | R | <ul style="list-style-type: none"> <li>○ Male 1.28, 0.98 – 1.66</li> <li>○ Chronic lung disease 16.81, 5.44 – 51.98</li> <li>○ Diabetes 6.86, 3.59 – 13.11</li> <li>○ Hypertension 8.75, 5.09 – 15.03</li> <li>○ Chronic kidney disease 13.96, 6.12 – 31.88</li> </ul>                                                                                                                    |  |  |
| Frontera et al., 2020 (USA)  |           | 4645 | R | <ul style="list-style-type: none"> <li>○ Age (continuous) 1.05, 1.03 – 1.07</li> <li>○ Male 0.79, 0.53 – 1.18</li> <li>○ Chronic kidney disease 0.82, 0.44 – 1.53</li> <li>○ Hypertension 0.70, 0.47 – 1.04</li> </ul>                                                                                                                                                                    |  |  |
| Fu et al., 2020 (China)      | Mean 46.6 | 75   | R | <ul style="list-style-type: none"> <li>○ Male 1.14, 0.36 – 3.56</li> </ul>                                                                                                                                                                                                                                                                                                                |  |  |
| Galiero et al., 2020 (Italy) | Mean 65   | 618  | R | <ul style="list-style-type: none"> <li>○ Age (continuous) 1.05, 1.02 – 1.07</li> <li>○ Male 2.63, 1.42 – 4.90</li> <li>○ Chronic kidney disease 1.01, 0.44 – 2.34</li> <li>○ Chronic liver disease 5.88, 2.39 – 14.46</li> <li>○ Cancer 2.62, 1.21 – 5.68</li> <li>○ Hypertension 1.30, 0.89 – 1.89</li> <li>○ Diabetes 1.48, 0.94 – 2.34</li> <li>○ Smoking 1.35, 0.84 – 2.16</li> </ul> |  |  |

|                                  |           |      |   |                                                                                                                                                                                                                                                            |                                                                                                                                                                                                                                                                                          |  |
|----------------------------------|-----------|------|---|------------------------------------------------------------------------------------------------------------------------------------------------------------------------------------------------------------------------------------------------------------|------------------------------------------------------------------------------------------------------------------------------------------------------------------------------------------------------------------------------------------------------------------------------------------|--|
|                                  |           |      |   | ○ Chronic respiratory disease 2.55, 1.61 – 4.04                                                                                                                                                                                                            |                                                                                                                                                                                                                                                                                          |  |
| Gao et al., 2020 (China)         |           | 2877 | R | ○ Hypertension 3.79, 2.21 – 6.53                                                                                                                                                                                                                           | ○ Hypertension 1.86, 1.56 – 2.23                                                                                                                                                                                                                                                         |  |
| Gao et al., 2020 (China)         | Median 60 | 139  | R | ○                                                                                                                                                                                                                                                          | ○ Age ≥65 vs <65 = 2.72, 1.21- 6.12<br>○ Hypertension 3.36, 1.41 – 9.52<br>○ Diabetes 16.53, 2.07 – 132.2<br>○ Chronic lung disease 4.53, 1.21 – 16.93                                                                                                                                   |  |
| Genet et al., 2020 (France)      | Mean 86.3 | 201  | R | ○ Cancer 1.59, 0.76 – 3.34<br>○ Stroke 1.66, 0.85 – 3.24<br>○ Cardiovascular disease 1.11, 0.59 – 2.04<br>○ Hypertension 0.91, 0.49 – 1.65<br>○ Chronic lung disease 0.97, 0.43 – 2.19<br>○ Diabetes 1.78, 0.87 – 3.64<br>○ Malnutrition 0.82, 0.44 – 1.52 |                                                                                                                                                                                                                                                                                          |  |
| Ghaffari et al., 2021 (Iran)     | Mean 61.9 | 361  | R |                                                                                                                                                                                                                                                            | ○ Male 0.77, 0.49 – 1.20<br>○ Diabetes 1.78, 1.07 – 2.98<br>○ Hypertension 1.75, 1.07 – 2.87<br>○ Cardiovascular disease 1.42, 0.78 – 2.58<br>○ Lung disease 1.01, 0.36 – 2.79<br>○ Cancer 1.22, 0.41 – 3.59<br>○ Chronic kidney disease 1.98, 0.63 – 6.15<br>○ Stroke 2.06, 0.56 – 7.54 |  |
| Giannoglou et al., 2020 (Greece) | Mean 60.4 | 512  | R | ○ Male 1.46, 0.88 – 2.43<br>○ Age ≥65 vs <65 = 8.22, 3.88 – 17.42<br>○ Cardiovascular disease 2.56, 1.27 – 5.15                                                                                                                                            | ○                                                                                                                                                                                                                                                                                        |  |

|                                       |                        |      |   |                                                                                                                                                                                                                                                                                                                                   |  |  |
|---------------------------------------|------------------------|------|---|-----------------------------------------------------------------------------------------------------------------------------------------------------------------------------------------------------------------------------------------------------------------------------------------------------------------------------------|--|--|
|                                       |                        |      |   | <ul style="list-style-type: none"> <li>○ Hypertension 3.60, 2.21 – 5.88</li> <li>○ Diabetes 2.11, 1.13 – 3.96</li> <li>○ Asthma 0.85, 0.42 – 1.75</li> <li>○ Chronic kidney disease 6.15, 2.73 – 13.82</li> </ul>                                                                                                                 |  |  |
| Goicoechea et al., 2020 (Spain)       | Mean 71                | 36   | R | <ul style="list-style-type: none"> <li>○ Male 0.56, 0.13 – 2.41</li> </ul>                                                                                                                                                                                                                                                        |  |  |
| Gomez et al., 2021 (USA)              |                        | 8108 | R | <ul style="list-style-type: none"> <li>○ Male 1.96, 1.34 – 2.90</li> <li>○ Age (continuous) 1.05, 1.04 – 1.07</li> </ul>                                                                                                                                                                                                          |  |  |
| González-Gancedo et al., 2021 (Spain) | Mean 67.9              | 1987 | R | <ul style="list-style-type: none"> <li>○ Age (continuous) 1.09, 1.07 – 1.19</li> </ul>                                                                                                                                                                                                                                            |  |  |
| Goodall et al., 2020 (UK)             | Median 69<br>IQR 56-80 | 981  | R | <ul style="list-style-type: none"> <li>○ Male 1.02, 0.78 – 1.34</li> <li>○ Diabetes 1.51, 1.15 – 1.97</li> <li>○ Hypertension 1.88, 1.45 – 2.46</li> <li>○ Cardiovascular disease 2.12, 1.57 – 2.85</li> <li>○ Cancer 1.75, 0.97 – 3.14</li> <li>○ Asthma 0.95, 0.58 – 1.53</li> </ul>                                            |  |  |
| Grasselli et al., 2020 (Italy)        | Median 63<br>IQR 56-69 | 3988 | R | <ul style="list-style-type: none"> <li>○ Age <math>\geq 64</math> vs <math>&lt;64</math> = 3.49, 3.07 – 3.98</li> <li>○ Male 1.28, 1.10 – 1.51</li> <li>○ Hypertension 2.02, 1.78 – 2.30</li> <li>○ Cardiovascular disease 2.11, 1.75 – 2.55</li> <li>○ Diabetes 2.07, 1.71 – 2.51</li> <li>○ Cancer 1.75, 1.39 – 2.21</li> </ul> |  |  |

|                               |                        |       |   |                                                                                                                                                                                                                                                                                       |  |                                                                                                                                                                                                                                                                                                                                                                                                                                                                      |
|-------------------------------|------------------------|-------|---|---------------------------------------------------------------------------------------------------------------------------------------------------------------------------------------------------------------------------------------------------------------------------------------|--|----------------------------------------------------------------------------------------------------------------------------------------------------------------------------------------------------------------------------------------------------------------------------------------------------------------------------------------------------------------------------------------------------------------------------------------------------------------------|
|                               |                        |       |   | <ul style="list-style-type: none"> <li>○ Chronic lung disease 2.82, 1.78 – 4.45</li> <li>○ Chronic kidney disease 4.89, 2.83 – 8.44</li> <li>○ Chronic liver disease 1.02, 0.66 – 1.56</li> </ul>                                                                                     |  |                                                                                                                                                                                                                                                                                                                                                                                                                                                                      |
| Gu T et al., 2020 (USA)       | Mean 53                | 1139  | R | <ul style="list-style-type: none"> <li>○ Age <math>\geq 65</math> vs <math>&lt;65</math> = 8.77, 5.34 – 14.41</li> <li>○ Male 2.12, 1.35 – 3.33</li> <li>○ Smoking 1.67, 1.06 – 2.62</li> </ul>                                                                                       |  | <ul style="list-style-type: none"> <li>○ Age <math>\geq 65</math> vs <math>&lt;65</math> = 2.50, 1.88 – 3.32</li> <li>○ Male 2.25, 1.52 – 3.34</li> <li>○ Smoking 1.36, 0.90 – 2.07</li> <li>○ Cardiovascular disease 1.21, 0.71 – 2.05</li> <li>○ Respiratory disease 0.98, 0.60 – 1.61</li> <li>○ Cancer 0.93, 0.60 – 1.44</li> <li>○ Diabetes 1.50, 0.99 – 2.28</li> <li>○ Kidney disease 2.74, 1.76 – 4.26</li> <li>○ Liver disease 0.95, 0.52 – 1.73</li> </ul> |
| Guarneri et al., 2021 (Italy) | Median 70<br>IQR 25-92 | 170   | R | <ul style="list-style-type: none"> <li>○ Male 0.71, 0.37 – 1.36</li> <li>○ Age (continuous) 1.03, 1.00 – 1.05</li> <li>○ Smoking 0.75, 0.29 – 1.91</li> <li>○ Hypertension 1.68, 0.88 – 3.21</li> </ul>                                                                               |  |                                                                                                                                                                                                                                                                                                                                                                                                                                                                      |
| Guo et al., 2020 (China)      | >65                    | 14238 | R | <ul style="list-style-type: none"> <li>○ Male 1.92, 1.56 – 2.36</li> </ul>                                                                                                                                                                                                            |  |                                                                                                                                                                                                                                                                                                                                                                                                                                                                      |
| Gupta et al., 2020 (USA)      | Mean 60.5              | 2215  | R | <ul style="list-style-type: none"> <li>○ Male 1.50, 1.19 – 1.90</li> <li>○ Hypertension 1.06, 0.83 – 1.36</li> <li>○ Diabetes 1.14, 0.91 – 1.43</li> <li>○ Chronic lung disease 1.39, 0.95 – 2.04</li> <li>○ Smoking 1.21, 0.76 – 1.93</li> <li>○ Cancer 2.15, 1.35 – 3.43</li> </ul> |  |                                                                                                                                                                                                                                                                                                                                                                                                                                                                      |

|                                    |             |     |   |                                                                                                                                                                                                                                                                                                                                                                                                                                          |  |  |
|------------------------------------|-------------|-----|---|------------------------------------------------------------------------------------------------------------------------------------------------------------------------------------------------------------------------------------------------------------------------------------------------------------------------------------------------------------------------------------------------------------------------------------------|--|--|
|                                    |             |     |   | <ul style="list-style-type: none"> <li>○ Age <math>\geq 60</math> vs <math>&lt;60</math> = 2.91, 2.41 – 3.51</li> <li>○ Asthma 0.65, 0.48 – 0.86</li> <li>○ Chronic liver disease 1.45, 0.90 – 2.31</li> <li>○ Chronic kidney disease 1.75, 1.36 – 2.26</li> </ul>                                                                                                                                                                       |  |  |
| Haase et al., 2020 (Denmark)       | Mean 68     | 323 | R | <ul style="list-style-type: none"> <li>○ Male 1.72, 0.99 – 2.96</li> <li>○ Hypertension 1.53, 0.96 – 2.41</li> <li>○ Chronic lung disease 2.15, 1.21 – 3.81</li> <li>○ Chronic kidney disease 1.95, 0.98 – 3.86</li> <li>○ Diabetes 1.13, 0.64 – 1.98</li> <li>○ Cancer 3.42, 1.14 – 10.28</li> </ul>                                                                                                                                    |  |  |
| Halvatsiotis et al., 2020 (Greece) | Median 65.5 | 90  | R | <ul style="list-style-type: none"> <li>○ Male 1.07, 0.34 – 3.38</li> <li>○ Chronic pulmonary disease 0.81, 0.15 – 4.27</li> <li>○ Cancer 0.38, 0.04 – 3.38</li> <li>○ Chronic kidney disease 8.21, 0.81 – 83.03</li> <li>○ Cardiovascular disease 0.59, 0.17 – 1.99</li> <li>○ Diabetes 2.71, 0.91 – 8.08</li> <li>○ Hypertension 0.81, 0.32 – 2.01</li> <li>○ Smoking 1.87, 0.71 – 4.95</li> <li>○ Obesity 2.03, 0.79 – 5.19</li> </ul> |  |  |

|                            |               |      |   |                                                                                                                                                                                                                                                                                                                                                                                                                                                                                                                                         |                                                                                                                          |                                                                                                                                                                                                                                                                                                   |
|----------------------------|---------------|------|---|-----------------------------------------------------------------------------------------------------------------------------------------------------------------------------------------------------------------------------------------------------------------------------------------------------------------------------------------------------------------------------------------------------------------------------------------------------------------------------------------------------------------------------------------|--------------------------------------------------------------------------------------------------------------------------|---------------------------------------------------------------------------------------------------------------------------------------------------------------------------------------------------------------------------------------------------------------------------------------------------|
|                            |               |      |   | ○ Age >65 vs ≤65 = 0.65, 0.25 – 1.62                                                                                                                                                                                                                                                                                                                                                                                                                                                                                                    |                                                                                                                          |                                                                                                                                                                                                                                                                                                   |
| Hashemi et al., 2020 (USA) | MEAN<br>63.3  | 363  | R | <ul style="list-style-type: none"> <li>○ Age (continuous) 1.08, 1.05 – 1.12</li> <li>○ Obesity 1.03, 0.51 – 2.09</li> <li>○ Male 1.62, 0.80 – 3.26</li> <li>○ Cardiovascular disease 0.98, 0.46 – 2.09</li> <li>○ Hypertension 2.20, 0.88 – 5.52</li> <li>○ Diabetes 1.38 , 0.68 – 2.79</li> </ul>                                                                                                                                                                                                                                      |                                                                                                                          | <ul style="list-style-type: none"> <li>○ Age (continuous) 1.01, 0.99 – 1.02</li> <li>○ Obesity 1.26, 0.79 – 1.98</li> <li>○ Male 1.51, 0.96 – 2.38</li> <li>○ Cardiovascular disease 0.88, 0.49 – 1.58</li> <li>○ Hypertension 0.93, 0.55 – 1.60</li> <li>○ Diabetes 1.22, 0.74 – 2.00</li> </ul> |
| Hatami et al., 2021 (Iran) | Mean<br>59.52 | 665  | R | <ul style="list-style-type: none"> <li>○ Male 1.48, 0.98 – 2.24</li> <li>○ Age ≥60 vs &lt;60 = 2.68, 1.74 – 4.14</li> <li>○ Obesity 0.81, 0.44 – 1.48</li> <li>○ Diabetes 1.39, 0.91 – 2.14</li> <li>○ Hypertension 1.90, 1.26 – 2.85</li> <li>○ Cardiovascular disease 1.70, 1.07 – 2.70</li> <li>○ Chronic kidney disease 1.07, 0.51 – 2.28</li> <li>○ Chronic lung disease 2.09, 0.63 – 6.92</li> <li>○ Asthma 1.75, 0.72 – 4.27</li> <li>○ Cancer 0.81, 0.37 – 1.77</li> <li>○ Cerebrovascular disease 2.31, 1.06 – 5.06</li> </ul> |                                                                                                                          | ○                                                                                                                                                                                                                                                                                                 |
| He et al., 2020 (China)    |               | 1187 | R |                                                                                                                                                                                                                                                                                                                                                                                                                                                                                                                                         | <ul style="list-style-type: none"> <li>○ Age (continuous) 1.07, 1.05 – 1.08</li> <li>○ Male 2.52, 1.80 – 3.54</li> </ul> |                                                                                                                                                                                                                                                                                                   |

|                                               |                               |     |   |                                                                                                                                                                                                                                                                                                         |                                                                                                                                                                                                                                                                                         |  |
|-----------------------------------------------|-------------------------------|-----|---|---------------------------------------------------------------------------------------------------------------------------------------------------------------------------------------------------------------------------------------------------------------------------------------------------------|-----------------------------------------------------------------------------------------------------------------------------------------------------------------------------------------------------------------------------------------------------------------------------------------|--|
| Hendra et al., 2021 (UK)                      | Mean<br>64.1                  | 148 | R | <ul style="list-style-type: none"> <li>○ Age (continuous) 1.05, 1.00 – 1.10</li> <li>○ Male 1.47, 0.51 – 4.34</li> <li>○ Diabetes 2.20, 0.64 – 7.49</li> <li>○ Hypertension 3.58, 0.57 – 22.69</li> <li>○ Cardiovascular disease 0.77, 0.26 – 2.25</li> <li>○ Lung disease 1.01, 0.21- 18.74</li> </ul> |                                                                                                                                                                                                                                                                                         |  |
| Hoffmann et al., 2021 (Germany, Spain, Italy) | ≥20                           | 175 | R |                                                                                                                                                                                                                                                                                                         | <ul style="list-style-type: none"> <li>○ Male 1.21, 0.50 – 2.90</li> <li>○ Age ≥60 vs &lt;60 = 1.85, 0.79 – 4.31</li> </ul>                                                                                                                                                             |  |
| Hu F et al., 2021 (China)                     | Mean<br>47.53                 | 91  | P |                                                                                                                                                                                                                                                                                                         | <ul style="list-style-type: none"> <li>○ Male 2.89, 1.07 – 7.83</li> <li>○ Hypertension 2.75, 0.89 – 8.43</li> <li>○ Diabetes 4.78, 1.16 – 19.75</li> </ul>                                                                                                                             |  |
| Hu J et al., 2020 (China)                     |                               | 252 | R | <ul style="list-style-type: none"> <li>○ Male 5.21, 2.41 – 11.27</li> <li>○ Smoking 1.27, 0.36 – 4.41</li> <li>○ Hypertension 1.05, 0.55 – 2.00</li> <li>○ Cardiovascular disease 2.13, 0.93 – 4.91</li> <li>○ Diabetes 0.85, 0.35 – 1.03</li> </ul>                                                    |                                                                                                                                                                                                                                                                                         |  |
| Hu X et al., 2021 (China)                     | Mean 44                       | 122 | R |                                                                                                                                                                                                                                                                                                         | ○ Male 4.41, 1.19 – 16.24                                                                                                                                                                                                                                                               |  |
| Huang R et al., 2020 (China)                  | Median<br>44<br>IQR 33-<br>54 | 202 | R |                                                                                                                                                                                                                                                                                                         | <ul style="list-style-type: none"> <li>○ Age &gt;60 vs ≤60 = 2.09, 0.70 – 6.22</li> <li>○ Male 2.29, 0.86 – 6.07</li> <li>○ Obesity 6.90, 2.38 – 19.99</li> <li>○ Hypertension 0.53, 0.12 – 2.42</li> <li>○ Diabetes 8.14, 2.84 – 23.34</li> <li>○ Smoking 1.11, 0.23 – 5.22</li> </ul> |  |
| Huang S et al., 2020 (China)                  | Median<br>62                  | 310 | R | <ul style="list-style-type: none"> <li>○ Age (continuous) = 1.04, 1.02 – 1.06</li> <li>○ Hypertension 1.26, 0.68 2.33</li> </ul>                                                                                                                                                                        | <ul style="list-style-type: none"> <li>○ Age (continuous) 1.05, 0.68 – 2.33</li> <li>○ Hypertension 1.56, 0.93 – 2.62</li> <li>○ Male 1.91, 1.16 - 3.13</li> </ul>                                                                                                                      |  |



|                                  |                      |      |    |                                                                                                                                                                                                                                                                       |  |                                                                                                                                                                                                                   |
|----------------------------------|----------------------|------|----|-----------------------------------------------------------------------------------------------------------------------------------------------------------------------------------------------------------------------------------------------------------------------|--|-------------------------------------------------------------------------------------------------------------------------------------------------------------------------------------------------------------------|
|                                  | IQR 49-70            |      |    | ○ Male 2.10, 1.12 – 3.94                                                                                                                                                                                                                                              |  |                                                                                                                                                                                                                   |
| Huang Y et al., 2020 (China)     |                      | 151  | R  | ○ Male 6.5, 1.41 – 29.90<br>○ Hypertension 3.73, 1.24 – 11.18<br>○ Chronic lung disease 8.4, 2.48 – 28.37                                                                                                                                                             |  |                                                                                                                                                                                                                   |
| Huang Y et al., 2020 (China)     | Median 64            | 1255 | R  |                                                                                                                                                                                                                                                                       |  | ○ Age ≥65 vs <65 = 2.42, 1.80 – 3.24<br>○ Male 2.34, 1.73 – 3.17<br>○ Diabetes 1.48, 1.05 – 2.09<br>○ Hypertension 1.67, 1.25 – 2.22<br>○ Cerebrovascular disease 2.10, 1.21 – 3.64<br>○ Cancer 0.81, 0.43 – 1.52 |
| Hussein et al., 2020 (USA)       | Mean 60.6<br>SD 15.7 | 502  | R  | ○ Asthma 0.69, 0.30 – 1.58                                                                                                                                                                                                                                            |  |                                                                                                                                                                                                                   |
| Hwang et al., 2020 (South Korea) | Adult                | 103  | R  | ○ Male 1.82, 0.73 – 4.15<br>○ Hypertension 1.74, 0.69 – 4.39<br>○ Diabetes 3.11, 1.24 – 7.80<br>○ Chronic kidney disease 0.58, 0.15 – 2.23<br>○ Chronic lung disease 8.92, 1.61 – 49.35<br>○ Cancer 2.62, 0.64 – 10.64<br>○ Cardiovascular disease 3.55, 1.03 – 12.21 |  |                                                                                                                                                                                                                   |
| Iaccarino et al., 2020 (Italy)   | Mean 68.2            | 2378 | CS | ○ Male 1.87, 1.41 – 2.30<br>○ Hypertension 1.31, 1.04 – 1.66<br>○ Diabetes 1.17, 0.89 – 1.55                                                                                                                                                                          |  |                                                                                                                                                                                                                   |

|                                |                    |      |    |                                                                                                                                                                                                                                                                                                                                                                                                                                                                                                                                     |  |  |
|--------------------------------|--------------------|------|----|-------------------------------------------------------------------------------------------------------------------------------------------------------------------------------------------------------------------------------------------------------------------------------------------------------------------------------------------------------------------------------------------------------------------------------------------------------------------------------------------------------------------------------------|--|--|
|                                |                    |      |    | <ul style="list-style-type: none"> <li>○ Chronic kidney disease 1.58, 0.14 – 2.43</li> <li>○ Cardiovascular disease 1.12, 0.80 – 1.55</li> <li>○ Obesity 2.47, 1.72 – 3.55</li> </ul>                                                                                                                                                                                                                                                                                                                                               |  |  |
| Iaccarino et al., 2020 (Italy) | Mean 66.5          | 1761 | CS | <ul style="list-style-type: none"> <li>○ Male 1.13, 0.82 – 1.56</li> <li>○ Hypertension 2.42, 1.73 – 3.40</li> <li>○ Obesity 0.99, 0.53 – 1.85</li> <li>○ Diabetes 2.76, 1.96 – 3.87</li> <li>○ Chronic lung disease 2.43, 1.54 – 3.83</li> <li>○ Chronic kidney disease 4.74, 2.97 – 7.59</li> </ul>                                                                                                                                                                                                                               |  |  |
| Imam Z et al., 2020 (USA)      | Mean 61<br>SD 16.3 | 1305 | R  | <ul style="list-style-type: none"> <li>○ Age <math>\geq 60</math> vs <math>&lt; 60</math> = 1.93, 1.26 – 2.94</li> <li>○ Smoking 1.19, 0.55 – 2.60</li> <li>○ Hypertension 1.43, 1.05 – 1.95</li> <li>○ Diabetes 1.24, 0.90 – 1.70</li> <li>○ Chronic kidney disease 1.86, 1.30 – 2.64</li> <li>○ Chronic lung disease 2.23, 1.41 – 3.52</li> <li>○ Cancer 1.84, 1.09 – 3.11</li> <li>○ Asthma 1.18, 0.71 – 1.96</li> <li>○ Cerebrovascular disease 2.11, 1.30 – 3.43</li> <li>○ Chronic liver disease 2.78, 0.51 – 15.3</li> </ul> |  |  |

|                                 |                        |       |   |                                                                                                                                                                                                                                                                                                                                                                                                     |  |  |
|---------------------------------|------------------------|-------|---|-----------------------------------------------------------------------------------------------------------------------------------------------------------------------------------------------------------------------------------------------------------------------------------------------------------------------------------------------------------------------------------------------------|--|--|
|                                 |                        |       |   | <ul style="list-style-type: none"> <li>○ Immunosuppression 2.49, 0.76 – 8.15</li> </ul>                                                                                                                                                                                                                                                                                                             |  |  |
| Incerti et al., 2021 (USA)      | Median 62<br>IQR 49-75 | 17086 | R | <ul style="list-style-type: none"> <li>○ Male 1.28, 1.17 – 1.41</li> <li>○ Smoking 1.28, 1.16 – 1.41</li> <li>○ Cancer 1.78, 1.58 – 2.02</li> <li>○ Cerebrovascular disease 2.44, 2.15 – 2.76</li> <li>○ Chronic pulmonary disease 3.08, 2.78 – 3.42</li> <li>○ Diabetes 1.65, 1.50 – 1.81</li> <li>○ Hypertension 2.76, 2.48 – 3.07</li> <li>○ Chronic kidney disease 3.09, 2.81 – 3.42</li> </ul> |  |  |
| Inciardi et al., 2020 (Italy)   | Mean 67                | 99    | R | <ul style="list-style-type: none"> <li>○ Male 1.82, 0.33 – 10.07</li> <li>○ Hypertension 0.56, 0.16 – 2.01</li> <li>○ Diabetes 3.47, 1.02 – 11.82</li> <li>○ Chronic lung disease 4.26, 0.70 – 25.93</li> <li>○ Chronic kidney disease 6.44, 1.74 – 23.84</li> <li>○ Cancer 2.72, 0.75 – 9.82</li> </ul>                                                                                            |  |  |
| Islam et al., 2020 (Bangladesh) | Median 37<br>IQR 28-49 | 1016  | R | <ul style="list-style-type: none"> <li>○ Age <math>\geq 60</math> vs <math>&lt; 60</math> = 7.55, 3.19 – 17.92</li> <li>○ Male 1.79, 0.71 – 4.54</li> <li>○ Smoking 0.85, 0.28 – 2.51</li> <li>○ Chronic lung disease 8.14, 3.53 – 18.74</li> <li>○ Diabetes 2.71, 1.18 – 6.24</li> </ul>                                                                                                           |  |  |

|                                 |                    |     |    |                                                                                                                                                            |                                                                                                                                                                                                                                                                                                                                                                                                                         |  |
|---------------------------------|--------------------|-----|----|------------------------------------------------------------------------------------------------------------------------------------------------------------|-------------------------------------------------------------------------------------------------------------------------------------------------------------------------------------------------------------------------------------------------------------------------------------------------------------------------------------------------------------------------------------------------------------------------|--|
|                                 |                    |     |    | <ul style="list-style-type: none"> <li>○ Cardiovascular disease 5.05, 1.64 – 15.48</li> <li>○ Hypertension 3.53, 1.53 – 8.16</li> </ul>                    |                                                                                                                                                                                                                                                                                                                                                                                                                         |  |
| Jain et al., 2021<br>(India)    | Mean 74<br>SD 15.4 | 63  | CS |                                                                                                                                                            | <ul style="list-style-type: none"> <li>○ Age (continuous)= 1.01, 0.98 – 1.04</li> <li>○ Smoking 0.48, 0.08 – 2.84</li> <li>○ Diabetes 1.29, 0.35 – 4.78</li> <li>○ Hypertension 1.63, 0.50 – 5.29</li> <li>○ Chronic lung disease 1.03, 0.06 – 17.28</li> </ul>                                                                                                                                                         |  |
| Jang et al., 2020<br>(Korea)    | Mean 56.9<br>SD 17 | 110 | R  |                                                                                                                                                            | <ul style="list-style-type: none"> <li>○ Age <math>\geq 70</math> vs <math>&lt;70</math> = 3.37, 0.26 – 43.58</li> <li>○ Male 2.98, 0.23 – 38.81</li> <li>○ Hypertension 1.00, 0.09 – 10.78</li> </ul>                                                                                                                                                                                                                  |  |
| Jegade et al., 2020<br>(USA)    | Adults             | 98  | R  | <ul style="list-style-type: none"> <li>○ Male 0.82, 0.34 – 2.00</li> <li>○ Age <math>&gt;60</math> vs <math>\leq 60</math> = 7.93, 2.91 – 21.59</li> </ul> |                                                                                                                                                                                                                                                                                                                                                                                                                         |  |
| Ji XY et al., 2021<br>(China)   | Mean 66.4          | 27  | R  |                                                                                                                                                            | <ul style="list-style-type: none"> <li>○ Male 0.78, 0.15 – 4.21</li> <li>○ Smoking 0.57, 0.08 – 3.64</li> <li>○ Diabetes 0.74, 0.11 – 4.86</li> </ul>                                                                                                                                                                                                                                                                   |  |
| Jinag N et al., 2021<br>(China) | Median 45          | 289 | CS |                                                                                                                                                            | <ul style="list-style-type: none"> <li>○ Age <math>\geq 65</math> vs <math>&lt;65</math> = 2.72, 1.31 – 5.63</li> <li>○ Male 1.87, 1.00 – 3.52</li> <li>○ Smoking 2.25, 0.36 – 14.09</li> <li>○ Diabetes 3.31, 1.12 – 9.75</li> <li>○ Cardiovascular disease 3.53, 0.98 – 12.64</li> <li>○ Chronic lung disease 3.16, 0.97 – 10.25</li> <li>○ Cancer 1.43, 0.23 – 8.75</li> <li>○ Obesity 1.07, 0.09 – 11.97</li> </ul> |  |
| Jiang Y et al., 2020<br>(China) | Median 70          | 281 | R  | <ul style="list-style-type: none"> <li>○ Hypertension 3.21, 1.21 – 8.51</li> </ul>                                                                         |                                                                                                                                                                                                                                                                                                                                                                                                                         |  |

|                                   |             |     |   |                                                                                                                                                                                                                                                                                                                      |  |                                                                                                                                                                                          |
|-----------------------------------|-------------|-----|---|----------------------------------------------------------------------------------------------------------------------------------------------------------------------------------------------------------------------------------------------------------------------------------------------------------------------|--|------------------------------------------------------------------------------------------------------------------------------------------------------------------------------------------|
|                                   | IQR 65-77   |     |   | <ul style="list-style-type: none"> <li>○ Diabetes 3.63, 1.21 – 10.94</li> </ul>                                                                                                                                                                                                                                      |  |                                                                                                                                                                                          |
| Jimeno et al., 2020 (Spain)       | Median 67.2 | 45  | R | <ul style="list-style-type: none"> <li>○ Male 0.6, 0.3 – 1.3</li> <li>○ Hypertension 2.6, 1.1 – 2.5</li> <li>○ Cardiovascular disease 2.3, 1.1 – 4.6</li> <li>○ Diabetes 2.4, 1.05 – 5.8</li> <li>○ Chronic lung disease 3.7, 1.4 – 9.8</li> <li>○ Smoking 2.4, 0.6 – 9.6</li> </ul>                                 |  |                                                                                                                                                                                          |
| Jorgensen et al., 2020 (Norway)   | Median 58   | 34  | P |                                                                                                                                                                                                                                                                                                                      |  | <ul style="list-style-type: none"> <li>○ Diabetes 0.77, 0.07 – 8.52</li> <li>○ Cardiovascular disease 3.33, 0.63 – 17.51</li> <li>○ Chronic kidney disease 2.75, 0.33 – 22.92</li> </ul> |
| Jose et al., 2021 (Saudi Arabia)  |             | 350 | R | <ul style="list-style-type: none"> <li>○ Diabetes 2.09, 1.18 – 3.72</li> <li>○ Age (continuous) 1.04, 1.02 – 1.06</li> <li>○ Male 0.59, 0.36 – 0.94</li> <li>○ Immunosuppression 1.24, 0.29 – 5.26</li> </ul>                                                                                                        |  | ○                                                                                                                                                                                        |
| Jung et al., 2020 (Multinational) | >=70        | 324 | P | <ul style="list-style-type: none"> <li>○ Male 1.46, 0.90 – 2.35</li> <li>○ Chronic kidney disease 2.35, 1.25 – 4.40</li> <li>○ Chronic lung disease 1.30, 0.79 – 2.15</li> <li>○ Hypertension 1.02, 0.64 – 1.61</li> <li>○ Diabetes 1.28, 0.79 – 2.06</li> <li>○ Cardiovascular disease 1.31, 0.75 – 2.27</li> </ul> |  |                                                                                                                                                                                          |

|                                   |           |      |   |                                                                                                                                                                                                                                                                                                              |                                                                                                                                                                                                                                                                                                                                                                                                                                              |                                                                                                                                                                                                                                                                                                                                                          |
|-----------------------------------|-----------|------|---|--------------------------------------------------------------------------------------------------------------------------------------------------------------------------------------------------------------------------------------------------------------------------------------------------------------|----------------------------------------------------------------------------------------------------------------------------------------------------------------------------------------------------------------------------------------------------------------------------------------------------------------------------------------------------------------------------------------------------------------------------------------------|----------------------------------------------------------------------------------------------------------------------------------------------------------------------------------------------------------------------------------------------------------------------------------------------------------------------------------------------------------|
| Kaeuffer et al., 2020<br>(France) | Mean 66   | 1045 | P | <ul style="list-style-type: none"> <li>○ Male 1.7, 1.1- 2.7</li> <li>○ Hypertension 0.6, 0.3- 0.9</li> <li>○ Diabetes 1.7, 1.0 – 2.7</li> <li>○ Chronic lung disease 0.9, 0.5 – 1.5</li> <li>○ Immunosuppression 3.8, 1.6 – 7.7</li> <li>○ Chronic kidney disease 2.3, 1.3 – 3.9</li> </ul>                  | <ul style="list-style-type: none"> <li>○ Male 2.52, 1.94 – 3.28</li> <li>○ Hypertension 1.14, 0.89 – 1.47</li> <li>○ Diabetes 1.20, 0.91 – 1.59</li> <li>○ Smoking 0.63, 0.31 – 1.30</li> <li>○ Cardiovascular disease 0.88, 0.60 – 1.31</li> <li>○ Chronic lung disease 1.30, 0.93 – 1.81</li> <li>○ Chronic kidney disease 1.06, 0.71 – 1.57</li> <li>○ Immunosuppression 1.36, 0.76 – 2.44</li> <li>○ Cancer 0.99, 0.66 – 1.48</li> </ul> |                                                                                                                                                                                                                                                                                                                                                          |
| Kalligeros et al., 2020<br>(USA)  | Median 60 | 103  | R |                                                                                                                                                                                                                                                                                                              |                                                                                                                                                                                                                                                                                                                                                                                                                                              | <ul style="list-style-type: none"> <li>○ Male 2.40, 0.87 – 6.64</li> <li>○ Diabetes 1.91, 0.71 – 5.19</li> <li>○ Hypertension 0.79, 0.27 – 2.28</li> <li>○ Cardiovascular disease 1.52, 0.51 – 4.51</li> <li>○ Chronic lung disease 1.50, 0.47 – 4.82</li> <li>○ Chronic renal disease 0.75, 0.20 – 2.71</li> <li>○ Cancer 2.94, 0.69 – 12.51</li> </ul> |
| Karahan et al., 2020<br>(Turkey)  | Mean 63.5 | 149  | R | <ul style="list-style-type: none"> <li>○ Age (continuous) 1.03, 1.01 – 0.06</li> <li>○ Male 1.46, 0.76 – 2.81</li> <li>○ Smoking 2.16, 0.198 – 4.30</li> <li>○ Diabetes 2.40, 1.23- 4.68</li> <li>○ Chronic kidney disease 3.22, 1.35 – 7.66</li> <li>○ Cardiovascular disease 4.83, 1.51 – 15.49</li> </ul> | <ul style="list-style-type: none"> <li>○ Male 1.37, 0.69 – 2.75</li> <li>○ Smoking 2.48, 1.11 – 5.55</li> <li>○ Hypertension 4.66, 2.22 – 9.80</li> <li>○ Diabetes 2.69, 1.25 – 5.77</li> <li>○ Chronic lung disease 1.29, 0.39 – 4.31</li> <li>○ Cancer 1.36, 0.50 – 3.72</li> <li>○ Chronic kidney disease 8.10, 1.83 – 35.69</li> </ul>                                                                                                   | ○                                                                                                                                                                                                                                                                                                                                                        |
| Karimi et al., 2020<br>(Iran)     | Mean 35.3 | 43   | R | ○ Male 1.76, 0.36 - 8.55                                                                                                                                                                                                                                                                                     |                                                                                                                                                                                                                                                                                                                                                                                                                                              |                                                                                                                                                                                                                                                                                                                                                          |

|                                     |              |      |   |                                                                                                                                                                                                                                                                                                                                                                                                                                             |                                                                                                                                                                                                                                                                                                                                                                                                                                                                                       |  |
|-------------------------------------|--------------|------|---|---------------------------------------------------------------------------------------------------------------------------------------------------------------------------------------------------------------------------------------------------------------------------------------------------------------------------------------------------------------------------------------------------------------------------------------------|---------------------------------------------------------------------------------------------------------------------------------------------------------------------------------------------------------------------------------------------------------------------------------------------------------------------------------------------------------------------------------------------------------------------------------------------------------------------------------------|--|
| Karlsson et al., 2020<br>(Denmark)  | Mean 85      | 102  | R | ○ Male 4.0, 1.8 – 9.5                                                                                                                                                                                                                                                                                                                                                                                                                       |                                                                                                                                                                                                                                                                                                                                                                                                                                                                                       |  |
| Kaya et al., 2021<br>(Japan)        |              | 102  | R | ○ Male 1.53, 0.44 – 5.38                                                                                                                                                                                                                                                                                                                                                                                                                    |                                                                                                                                                                                                                                                                                                                                                                                                                                                                                       |  |
| Khan et al., 2020<br>(Saudi Arabia) | Median<br>34 | 648  | R |                                                                                                                                                                                                                                                                                                                                                                                                                                             | <ul style="list-style-type: none"> <li>○ Male 2.02, 1.22 – 3.34</li> <li>○ Age <math>\geq 65</math> vs <math>&lt; 65</math> = 3.15, 1.40 – 7.09</li> <li>○ Smoking 0.96, 0.50 – 1.85</li> <li>○ Diabetes 2.37, 1.28 – 4.37</li> <li>○ Hypertension 2.28, 1.23 – 4.20</li> <li>○ Chronic kidney disease 1.50, 0.32 – 6.69</li> <li>○ Chronic respiratory disease 2.24, 1.23 – 4.08</li> <li>○ Cardiovascular disease 4.30, 10.51 – 1.76</li> <li>○ Cancer 2.98, 1.03 – 8.61</li> </ul> |  |
| Kim D et al., 2020<br>(Korea)       |              | 9148 | R | <ul style="list-style-type: none"> <li>○ Male 2.18, 1.50 – 3.17</li> <li>○ Diabetes 1.82, 1.25 – 2.67</li> <li>○ Hypertension 1.32, 0.88 – 1.99</li> </ul>                                                                                                                                                                                                                                                                                  |                                                                                                                                                                                                                                                                                                                                                                                                                                                                                       |  |
| Kim E et al., 2021<br>(Korea)       | Median<br>71 | 110  | R | <ul style="list-style-type: none"> <li>○ Age <math>\geq 65</math> vs <math>&lt; 65</math> = 1.88, 0.81 - 4.39</li> <li>○ Male 0.91, 0.42 - 1.97</li> <li>○ Smoking 1.40, 0.61 – 3.17</li> <li>○ Hypertension 1.08, 0.51 - 2.20</li> <li>○ Chronic kidney disease 4.10, 1.03 – 16.42</li> <li>○ Cerebrovascular disease 0.88, 0.23 – 3.33</li> <li>○ Cancer 2.16, 0.57 – 8.13</li> <li>○ Cardiovascular disease 1.76, 6.93 – 0.44</li> </ul> |                                                                                                                                                                                                                                                                                                                                                                                                                                                                                       |  |

|                                      |              |      |   |                                                                                                                                                                                                                                                                                                                                                                                                                                                                                      |  |  |
|--------------------------------------|--------------|------|---|--------------------------------------------------------------------------------------------------------------------------------------------------------------------------------------------------------------------------------------------------------------------------------------------------------------------------------------------------------------------------------------------------------------------------------------------------------------------------------------|--|--|
| Kim S et al., 2020<br>(Korea)        | MEDIAN<br>58 | 7057 | R | <ul style="list-style-type: none"> <li>○ Age &gt;70 vs ≤70 = 4.77, 2.21 – 11.05</li> <li>○ Male 2.16, 1.59 – 2.94</li> <li>○ Asthma 1.87, 0.91 – 3.85</li> <li>○ Chronic lung disease 2.26, 0.86 – 5.97</li> <li>○ Chronic renal disease 8.30, 4.14 – 16.62</li> <li>○ Smoking 1.58, 0.94 – 2.65</li> <li>○ Diabets 2.59, 1.32 – 5.06</li> <li>○ Cancer 4.06, 1.35 – 10.98</li> <li>○ Cardiovascular disease 3.81, 0.99 – 13.06</li> <li>○ Hypertension 2.16, 1.09 – 4.43</li> </ul> |  |  |
| Krause et al., 2020<br>(USA)         |              | 85   | R | <ul style="list-style-type: none"> <li>○ Age ≥60 vs &lt;60 = 9.45, 1.43 – 62.31</li> <li>○ Male 0.50, 0.18 – 1.41</li> <li>○ Hypertension 1.97, 0.45 – 8.70</li> <li>○ Diabetes 0.75, 0.19 – 2.86</li> <li>○ Cancer 5.75, 1.16 – 28.44</li> <li>○ Cardiovascular disease 2.25, 0.81 – 6.26</li> </ul>                                                                                                                                                                                |  |  |
| Krishnamoorthy ey al., 2021<br>(USA) | ≥15          | 799  | R | <ul style="list-style-type: none"> <li>○ Age (continuous) 1.06, 1.04 – 1.08</li> <li>○ Hypertension 0.70, 0.40 – 1.20</li> <li>○ Chronic lung disease 1.37, 0.76 – 2.47</li> </ul>                                                                                                                                                                                                                                                                                                   |  |  |



|                              |           |     |   |                                                                                                                                                                                                                                                                                                                                                                                      |  |  |
|------------------------------|-----------|-----|---|--------------------------------------------------------------------------------------------------------------------------------------------------------------------------------------------------------------------------------------------------------------------------------------------------------------------------------------------------------------------------------------|--|--|
|                              |           |     |   | <ul style="list-style-type: none"> <li>○ Diabetes 1.77, 1.10 – 2.83</li> <li>○ Cardiovascular disease 1.43, 0.75 – 2.74</li> </ul>                                                                                                                                                                                                                                                   |  |  |
| Krishnan et al., 2020 (USA)  | Median 68 | 152 | R | <ul style="list-style-type: none"> <li>○ Age (continuous) 1.08, 1.04 – 1.12</li> <li>○ Male 1.19, 0.61-2.33</li> <li>○ Hypertension 2.56, 1.23 – 5.31</li> <li>○ Diabetes 1.41, 0.73 – 2.74</li> <li>○ Asthma 1.19, 0.49 – 2.91</li> <li>○ Chronic lung disease 2.04, 0.75 – 5.51</li> <li>○ Chronic renal disease 0.93, 0.37 – 2.34</li> <li>○ Smoking 1.13, 0.56 – 2.28</li> </ul> |  |  |
| Kunal et al., 2020 (India)   | Mean 51.2 | 108 | R | <ul style="list-style-type: none"> <li>○ Male 0.91, 0.38 – 2.20</li> <li>○ Hypertension 2.94, 1.24 – 7.91</li> <li>○ Diabetes 2.38, 0.99 – 5.69</li> <li>○ Cardiovascular disease 1.53, 0.47 – 5.02</li> <li>○</li> </ul>                                                                                                                                                            |  |  |
| Kute et al., 2021 (India)    | Mean 43   | 250 | R | <ul style="list-style-type: none"> <li>○ Male 1.47, 0.42 – 5.13</li> <li>○ Hypertension 1.16, 0.54 – 2.52</li> <li>○ Dibetes 2.03, 0.91 – 4.51</li> </ul>                                                                                                                                                                                                                            |  |  |
| Laake et al., 2020 (Noraway) | Median 63 | 217 | P | <ul style="list-style-type: none"> <li>○ Male 0.67, 0.38 – 1.19</li> <li>○ Age <math>\geq 65</math> vs <math>&lt;65</math> = 3.44, 1.99 – 5.96</li> </ul>                                                                                                                                                                                                                            |  |  |

|                            |           |        |   |                                                                                                                                                                                                                                                                                                                            |  |  |
|----------------------------|-----------|--------|---|----------------------------------------------------------------------------------------------------------------------------------------------------------------------------------------------------------------------------------------------------------------------------------------------------------------------------|--|--|
|                            |           |        |   | <ul style="list-style-type: none"> <li>○ Cardiovascular disease 2.13, 1.26 – 3.61</li> <li>○ Diabetes 2.78, 1.53 – 5.06</li> <li>○ Asthma 1.20, 0.59 – 2.44</li> <li>○ Immunodeficiency 1.38, 0.57 – 3.33</li> <li>○ Chronic kidney disease 4.18, 1.82 – 9.58</li> <li>○ Chronic lung disease 2.26, 0.97 – 5.27</li> </ul> |  |  |
| Lara et al., 2020 (USA)    | Median 64 | 121    | R | <ul style="list-style-type: none"> <li>○ Smoking 5.71, 2.07 – 15.78</li> <li>○ Hypertension 1.95, 0.69 – 5.49</li> <li>○ Diabetes 1.66, 0.61 – 4.47</li> <li>○ Asthma 2.37, 0.56 – 10.08</li> <li>○ Chronic kidney disease 4.80, 1.16 – 19.81</li> </ul>                                                                   |  |  |
| Lee J et al., 2021 (Korea) |           | 38,919 | R | <ul style="list-style-type: none"> <li>○ Male 2.12, 1.47 – 3.12</li> <li>○ Diabetes 2.24, 1.56 – 3.22</li> </ul>                                                                                                                                                                                                           |  |  |
| Lee L et al., 2020 (UK)    | Median 69 | 800    | P | <ul style="list-style-type: none"> <li>○ Age (continuous) 1.67, 1.19 – 2.34</li> <li>○ Male 1.67, 1.19 – 2.34</li> <li>○ Cardiovascular disease 2.32, 1.47 – 3.64</li> <li>○ Chronic lung disease 1.80, 1.00 – 3.27</li> <li>○ Diabetes 1.61, 1.03 – 2.43</li> <li>○ Hypertension 1.95, 1.36 – 2.80</li> </ul>             |  |  |

|                                      |              |      |   |                                                                                                                                                                                                                                                                                                         |                                                                                                                                                                                                                    |  |
|--------------------------------------|--------------|------|---|---------------------------------------------------------------------------------------------------------------------------------------------------------------------------------------------------------------------------------------------------------------------------------------------------------|--------------------------------------------------------------------------------------------------------------------------------------------------------------------------------------------------------------------|--|
| Lee S et al., 2020<br>(Korea)        |              | 7272 | R | <ul style="list-style-type: none"> <li>○ Age 1.06, 1.05 – 1.07</li> <li>○ Male 2.31, 1.58 – 3.37</li> <li>○ Asthma 0.99, 0.58 – 1.70</li> </ul>                                                                                                                                                         |                                                                                                                                                                                                                    |  |
| Lee Y et al., 2020<br>(Korea)        | Median<br>61 | 1005 | R | <ul style="list-style-type: none"> <li>○ Age <math>\geq 65</math> vs <math>&lt; 65</math> = 4.96, 2.65 – 9.30</li> <li>○ Diabetes 2.29, 1.44 – 3.64</li> <li>○ Chronic lung disease 4.52, 1.85 – 11.02</li> </ul>                                                                                       | <ul style="list-style-type: none"> <li>○ Age <math>\geq 65</math> vs <math>&lt; 65</math> = 4.32, 2.73 – 6.84</li> <li>○ Diabetes 2.26, 1.43 – 3.58</li> <li>○ Chronic renal disease 4.20, 1.20 – 14.71</li> </ul> |  |
| Lei C et al., 2020<br>(China)        | Median<br>48 | 297  | R |                                                                                                                                                                                                                                                                                                         | ○ Male 1.93, 1.05 – 3.56                                                                                                                                                                                           |  |
| Lei F et al., 2020<br>(China)        | Median<br>56 | 5771 | R |                                                                                                                                                                                                                                                                                                         | ○ Male 1.51, 1.32 – 1.71                                                                                                                                                                                           |  |
| Li G et al., 2020<br>(Multinational) | Median<br>66 | 1075 | R | <ul style="list-style-type: none"> <li>○ Male 1.85, 1.23 – 2.80</li> <li>○ Hypertension 3.74, 2.45 – 5.72</li> <li>○ Diabetes 2.30, 1.46 – 3.63</li> <li>○ Cardiovascular disease 1.36, 0.81 – 2.31</li> <li>○ Cerebrovascular disease 0.37, 0.13 – 0.99</li> <li>○ Cancer 1.28, 0.51 – 3.16</li> </ul> |                                                                                                                                                                                                                    |  |
| Li G et al., 2021<br>(China)         |              | 145  | R | <ul style="list-style-type: none"> <li>○ Male 1.49, 0.66 – 3.36</li> <li>○ Hypertension 1.60, 0.71 – 3.63</li> <li>○ Diabetes 1.04, 0.39 – 2.73</li> <li>○ Chronic lung disease 2.45, 0.64 – 9.35</li> <li>○ Cerebrovascular disease 2.10, 0.44 – 9.93</li> </ul>                                       |                                                                                                                                                                                                                    |  |

|                                 |               |      |   |                                                                                                                                                                                                                                                                                  |                                                                                                                                                                                                                                                                                                                                                                                                                                                                    |  |
|---------------------------------|---------------|------|---|----------------------------------------------------------------------------------------------------------------------------------------------------------------------------------------------------------------------------------------------------------------------------------|--------------------------------------------------------------------------------------------------------------------------------------------------------------------------------------------------------------------------------------------------------------------------------------------------------------------------------------------------------------------------------------------------------------------------------------------------------------------|--|
| Li HY et al., 2020<br>(China)   | Mean<br>58.8  | 132  | R |                                                                                                                                                                                                                                                                                  | <ul style="list-style-type: none"> <li>○ Age <math>\geq 60</math> vs <math>&lt; 60 = 1.26, 0.60 - 1.26</math></li> <li>○ Male 5.31, 2.21 – 12.75</li> <li>○ Cancer 3.05, 0.65 – 14.31</li> </ul>                                                                                                                                                                                                                                                                   |  |
| Li K et al., 2020<br>(China)    | Median<br>57  | 102  | R | <ul style="list-style-type: none"> <li>○ Age <math>\geq 65</math> vs <math>&lt; 65 = 4.17, 1.34 - 13.02</math></li> <li>○ Male 2.22, 0.65 – 7.69</li> <li>○ Diabetes 0.88, 0.18 – 4.34</li> <li>○ Hypertension 2.30, 0.75 – 7.03</li> <li>○ Smoking 0.96, 0.11 – 8.63</li> </ul> | ○                                                                                                                                                                                                                                                                                                                                                                                                                                                                  |  |
| Li T et al., 2020<br>(China)    | Mean<br>69.2  | 312  | R | ○                                                                                                                                                                                                                                                                                | <ul style="list-style-type: none"> <li>○ Male 1.28, 0.79 – 2.07</li> <li>○ Smoking 1.62, 0.77 – 3.39</li> <li>○ Hypertension 6.16, 3.46 – 10.97</li> <li>○ Diabetes 1.64, 1.02 – 2.65</li> <li>○ Cardiovascular disease 2.65, 4.40 – 1.60</li> <li>○ Chronic lung disease 1.40, 0.62 – 3.13</li> <li>○ Cerebrovascular disease 1.67, 0.67 – 4.17</li> <li>○ Chronic kidney disease 1.33, 0.37 – 4.81</li> <li>○ Chronic liver disease 1.13, 0.32 – 3.96</li> </ul> |  |
| Lian et al., 2020<br>(China)    | Mean<br>68.28 | 788  | R |                                                                                                                                                                                                                                                                                  | <ul style="list-style-type: none"> <li>○ Age <math>\geq 60</math> vs <math>&lt; 60 = 4.61, 2.81 - 7.55</math></li> </ul>                                                                                                                                                                                                                                                                                                                                           |  |
| Lievre et al., 2020<br>(France) | Median<br>67  | 1289 | P | <ul style="list-style-type: none"> <li>○ Age <math>\geq 65</math> vs <math>&lt; 65 = 1.68, 1.30 - 2.16</math></li> <li>○ Male 1.61, 1.25 – 2.08</li> <li>○ Obesity 1.15, 0.82 – 1.61</li> <li>○ Smoking 2.03, 1.59 – 2.59</li> </ul>                                             | ○                                                                                                                                                                                                                                                                                                                                                                                                                                                                  |  |

|                              |                        |     |    |                                                                                                                                                                                                                                                                                                                                                                                                                |                                                                                                                                                                                                                                                   |  |
|------------------------------|------------------------|-----|----|----------------------------------------------------------------------------------------------------------------------------------------------------------------------------------------------------------------------------------------------------------------------------------------------------------------------------------------------------------------------------------------------------------------|---------------------------------------------------------------------------------------------------------------------------------------------------------------------------------------------------------------------------------------------------|--|
|                              |                        |     |    | <ul style="list-style-type: none"> <li>○ Chronic lung disease 2.15, 1.48 – 3.14</li> <li>○ Diabetes 1.40, 1.04 – 1.89</li> <li>○ Hypertension 1.78, 1.39 – 2.27</li> </ul>                                                                                                                                                                                                                                     |                                                                                                                                                                                                                                                   |  |
| Lim et al., 2021 (Singapore) | Median 59              | 275 | R  | ○ Male 3.69, 1.50 – 9.08                                                                                                                                                                                                                                                                                                                                                                                       |                                                                                                                                                                                                                                                   |  |
| Ling et al., 2020 (UK)       | Median 74<br>IQR 63-83 | 444 | CS | <ul style="list-style-type: none"> <li>○ Age &gt;74 vs ≤74 = 1.71, 0.80 – 3.70</li> <li>○ Asthma 0.18, 0.04 -0.94</li> <li>○ Diabetes 0.86, 0.41 – 1.81</li> <li>○ Male 0.68, 0.33 – 1.37</li> <li>○ Hypertension 1.25, 0.85 – 1.83</li> </ul>                                                                                                                                                                 |                                                                                                                                                                                                                                                   |  |
| Liu D et al., 2020 (China)   | Median 63              | 599 | P  | <ul style="list-style-type: none"> <li>○ Male 1.51, 0.94 – 2.45</li> <li>○ Smoking 0.98, 0.55 – 1.75</li> <li>○ Hypertension 0.58, 0.27 – 1.26</li> <li>○ Diabetes 1.01, 0.46 – 2.21</li> <li>○ Cardiovascular disease 0.90, 0.43 – 1.88</li> <li>○ Chronic lung disease 0.83, 0.24 – 2.85</li> <li>○ Cerebrovascular disease 0.95, 0.21 – 4.27</li> <li>○ Chronic kidney disease 0.46, 0.11 – 1.98</li> </ul> |                                                                                                                                                                                                                                                   |  |
| Liu J et al., 2021 (China)   | Median 62              | 122 | R  |                                                                                                                                                                                                                                                                                                                                                                                                                | <ul style="list-style-type: none"> <li>○ Male 1.04, 0.76 – 1.41</li> <li>○ Age ≥65 vs &lt;65 = 1.46, 1.09 – 1.05</li> <li>○ Smoking 0.81, 0.13 – 5.04</li> <li>○ Hypertension 2.03, 0.93 – 4.46</li> <li>○ Diabetes 4.04, 0.87 – 18.81</li> </ul> |  |

|                                 |                 |      |   |                                                                                                                                                                           |                                                                                                                                               |                                                                                |
|---------------------------------|-----------------|------|---|---------------------------------------------------------------------------------------------------------------------------------------------------------------------------|-----------------------------------------------------------------------------------------------------------------------------------------------|--------------------------------------------------------------------------------|
|                                 |                 |      |   |                                                                                                                                                                           | ○ Cerebrovascular disease 0.80, 0.21 – 3.01                                                                                                   |                                                                                |
| Liu S et al., 2020 (China)      |                 | 721  | R |                                                                                                                                                                           | ○ Age $\geq 65$ vs $<65$ = 6.56, 3.70 – 11.64<br>○ Hypertension 1.06, 0.47 – 2.40<br>○ Diabetes 1.64, 0.52 – 5.22<br>○ Male 1.69, 0.99 – 2.89 |                                                                                |
| Lohia et al., 2021 (USA)        | Mean<br>64.11   | 1871 | R | ○ Chronic respiratory disease 1.36, 1.08 – 1.72<br>○ Smoking 1.14, 0.91 – 1.42                                                                                            | ○                                                                                                                                             | ○ Chronic respiratory disease 1.34, 1.07 – 1.68<br>○ Smoking 1.25, 1.01 – 1.55 |
| Long et al., 2020 (China)       | Median<br>63.55 | 115  | R | ○ Age $\geq 60$ vs $<60$ = 2.66, 0.83 – 8.47<br>○ Male 0.77, 0.31 – 1.92                                                                                                  |                                                                                                                                               |                                                                                |
| Lorente L et al, 2021a (Spain)  |                 | 143  | P | ○ Male 0.48, 0.19 – 1.23<br>○ Diabetes 0.92, 0.35 – 2.40<br>○ Chronic lung disease 2.44, 1.02 – 11.58<br>○ Hypertension 1.21, 0.51 – 2.88<br>○ Smoking 1.96, 0.35 – 10.75 |                                                                                                                                               |                                                                                |
| Lorente L et al., 2021b (Spain) |                 | 3886 | P | ○ Male 0.52, 0.12 – 2.20<br>○ Diabetes 0.34, 0.04 – 2.99<br>○ Chronic lung disease 2.18, 0.20 – 23.36<br>○ Smoking 1.61, 0.16 – 16.08                                     |                                                                                                                                               |                                                                                |
| Louapre et al., 2020 (France)   | Mean<br>44.6    | 348  | R | ○ Male 2.11, 1.23 – 3.63<br>○ Cardiovascular disease 5.72, 2.39 – 13.66<br>○ Diabetes 5.36, 1.93 – 14.95                                                                  |                                                                                                                                               |                                                                                |

|                           |           |      |   |                                                                                                                                                                                                                                                                                                                                                                                           |  |  |
|---------------------------|-----------|------|---|-------------------------------------------------------------------------------------------------------------------------------------------------------------------------------------------------------------------------------------------------------------------------------------------------------------------------------------------------------------------------------------------|--|--|
|                           |           |      |   | <ul style="list-style-type: none"> <li>○ Smoking 0.65, 0.24 – 1.74</li> <li>○ Obesity 2.95, 1.25 – 6.94</li> </ul>                                                                                                                                                                                                                                                                        |  |  |
| Lu Y et al., 2021 (China) | Median 59 | 77   | R | <ul style="list-style-type: none"> <li>○ Male 2.01, 0.77 – 5.19</li> <li>○ Smoking 0.45, 0.04 – 5.17</li> <li>○ Hypertension 1.12, 0.44 – 2.89</li> <li>○ Diabetes 0.71, 0.18 – 2.88</li> </ul>                                                                                                                                                                                           |  |  |
| Lucar et al., 2021 (USA)  | Median 59 | 100  | R | <ul style="list-style-type: none"> <li>○ Age <math>\geq 65</math> vs <math>&lt;65</math> = 0.59, 0.11 – 3.24</li> <li>○ Male 2.05, 0.55 – 7.52</li> <li>○ Smoking 5.85, 1.20 – 28.57</li> <li>○ Cardiovascular disease 0.93, 0.13 – 6.63</li> <li>○ Chronic kidney disease 3.11, 0.62 – 15.43</li> <li>○ Diabetes 5.94, 1.45 – 24.25</li> <li>○ Hypertension 0.42, 0.09 – 1.92</li> </ul> |  |  |
| Lunski et al., 2021 (USA) |           | 5145 | R | <ul style="list-style-type: none"> <li>○ Cancer 2.03, 1.44 – 2.87</li> <li>○ Age <math>\geq 65</math> vs <math>&lt;65</math> = 5.96, 4.71-7.54</li> <li>○ Male 2.15, 1.73 – 2.67</li> <li>○ Chronic kidney disease 3.84, 2.98 – 4.93</li> <li>○ Chronic lung disease 1.34, 0.96 – 1.88</li> <li>○ Diabetes 0.92, 0.70 – 1.21</li> <li>○ Hypertension 0.60, 0.47 – 0.78</li> </ul>         |  |  |

|                                     |           |      |   |                                                                                                                                                                                                                                                                                                                                                                       |  |                                                                                         |
|-------------------------------------|-----------|------|---|-----------------------------------------------------------------------------------------------------------------------------------------------------------------------------------------------------------------------------------------------------------------------------------------------------------------------------------------------------------------------|--|-----------------------------------------------------------------------------------------|
|                                     |           |      |   | ○ Obesity 1.30, 1.03 – 1.63                                                                                                                                                                                                                                                                                                                                           |  |                                                                                         |
| Luo Hey al., 2020 (China)           | Median 46 | 625  | R | ○ Age $\geq 65$ vs $<65$ = 6.56, 3.70 – 11.64                                                                                                                                                                                                                                                                                                                         |  |                                                                                         |
| Maguire et al., 2020 (UK)           |           | 224  | R | ○ Age $\geq 70$ vs $<70$ = 4.49, 2.33 – 8.64<br>○ Male 1.55, 0.82 – 2.93<br>○ Hypertension 2.02, 1.08 – 3.78<br>○ Chronic kidney disease 2.04, 0.88 – 4.74<br>○ Chronic lung disease 1.48, 0.69 – 3.16<br>○ Smoking 1.06, 0.57 – 1.98<br>○ Alcohol 1.43, 0.61 – 3.33<br>○ Liver disease 0.87, 0.28 – 2.75<br>○ Cancer 1.69, 0.41 – 7.02<br>○ Asthma 0.26, 0.09 – 0.76 |  |                                                                                         |
| Mak et al., 2020 (Sweden)           | Mean 69.2 | 2812 | P | ○ Age 1.11, 1.09 – 1.13<br>○ Male 1.48, 1.13 – 1.94<br>○ Smoking 1.29, 0.89 – 1.93                                                                                                                                                                                                                                                                                    |  |                                                                                         |
| Marengoni et al., 2020 (Italy)      | $\geq 70$ | 91   | R | ○ Male 3.08, 0.87 – 12.80                                                                                                                                                                                                                                                                                                                                             |  |                                                                                         |
| Marouf et al., 2021 (Qatar)         | $\geq 18$ | 568  | R | ○ Male 0.82, 0.28 – 2.37<br>○ Smoking 5.07, 1.71 – 15.07<br>○ Diabetes 3.46, 1.18 – 10.13                                                                                                                                                                                                                                                                             |  | ○ Male 0.73, 0.37 – 1.44<br>○ Smoking 1.93, 0.85 – 4.41<br>○ Diabetes 3.24, 1.63 – 6.42 |
| Martinez-Lopez et al., 2020 (Spain) | Median 71 | 167  | R | ○ Age $>60$ vs $\leq 60$ = 3.0, 1.4 – 8.4<br>○ Male 3.8, 1.7 – 8.4                                                                                                                                                                                                                                                                                                    |  |                                                                                         |



|                                  |           |      |   |                                                                                                                                                                                                                                                                                                                                                                |  |  |
|----------------------------------|-----------|------|---|----------------------------------------------------------------------------------------------------------------------------------------------------------------------------------------------------------------------------------------------------------------------------------------------------------------------------------------------------------------|--|--|
|                                  |           |      |   | <ul style="list-style-type: none"> <li>○ Hypertension 1.7, 0.8 – 3.5</li> <li>○ Renal disease 4.6, 1.9 – 11.3</li> <li>○ Cardiovascular disease 1.22, 0.56 – 2.66</li> <li>○ Pulmonary disease 1.33, 0.54 – 3.29</li> <li>○ Diabetes 1.12, 0.48 – 2.63</li> </ul>                                                                                              |  |  |
| Martins et al., 2021 (Portugal)  | Median 71 | 62   | R | <ul style="list-style-type: none"> <li>○ Male 10.50, 1.24 – 88.59</li> <li>○ Hypertension 3.60, 0.70 – 18.46</li> <li>○ Diabetes 1.69, 0.46 – 6.13</li> <li>○ Cardiovascular disease 3.78, 0.98 – 14.56</li> <li>○ Cancer 7.60, 1.75 – 32.93</li> <li>○ Chronic lung disease 1.52, 0.26 – 9.03</li> <li>○ Chronic kidney disease 2.67, 0.39 – 18.17</li> </ul> |  |  |
| Mash et al., 2020 (South Africa) | Mean 46.3 | 1376 | R | <ul style="list-style-type: none"> <li>○ Male 2.02, 1.37 – 2.98</li> <li>○ Diabetes 1.84, 1.24 – 2.73</li> <li>○ Obesity 1.58, 1.02 – 2.46</li> <li>○ Cardiovascular disease 2.85, 1.52 – 5.35</li> <li>○ Cancer 7.45, 1.87 – 29.89</li> <li>○ Chronic renal disease 5.16, 2.82 – 9.43</li> <li>○ Hypertension 3.95, 2.73 – 5.70</li> </ul>                    |  |  |

|                                   |           |        |   |                                                                                                                                                                                                                                                                                                                                                                                                                            |  |                                                                                    |
|-----------------------------------|-----------|--------|---|----------------------------------------------------------------------------------------------------------------------------------------------------------------------------------------------------------------------------------------------------------------------------------------------------------------------------------------------------------------------------------------------------------------------------|--|------------------------------------------------------------------------------------|
|                                   |           |        |   | <ul style="list-style-type: none"> <li>○ Chronic lung disease 1.34, 0.59 – 3.03</li> <li>○ Asthma 1.11, 0.52 – 2.36</li> <li>○ Smoking 1.01, 0.46 – 2.21</li> </ul>                                                                                                                                                                                                                                                        |  |                                                                                    |
| Mather et al., 2020 (USA)         | Mean 67   | 878    | R | <ul style="list-style-type: none"> <li>○ Obesity 5.87, 2.54 – 13.6</li> <li>○ Renal disease 2.50, 1.60 – 3.93</li> <li>○ Age (cont) 1.06, 1.04 – 1.08</li> <li>○ Cardiovascular disease 1.44, 0.80 – 2.62</li> </ul>                                                                                                                                                                                                       |  |                                                                                    |
| Mato et al., 2020 (international) | Median 63 | 198    | R | <ul style="list-style-type: none"> <li>○ Age <math>\geq 65</math> vs <math>&lt; 65</math> = 2.05, 1.05 – 4.02</li> <li>○ Male 0.77, 0.42 – 1.42</li> <li>○ Hypertension 1.35, 0.75 – 2.45</li> <li>○ Diabetes 2.89, 1.42 – 5.90</li> <li>○ Chronic lung disease 6.70, 2.47 – 18.18</li> <li>○ Asthma 3.41, 1.02 – 11.39</li> <li>○ Chronic renal disease 2.02, 0.95 – 4.30</li> <li>○ Smoking 1.07, 0.57 – 1.99</li> </ul> |  |                                                                                    |
| Matsuzawa et al., 2020 (Japan)    | Mean 60   | 151    | R | <ul style="list-style-type: none"> <li>○ Hypertension 0.63, 0.15 – 2.34</li> </ul>                                                                                                                                                                                                                                                                                                                                         |  | <ul style="list-style-type: none"> <li>○ Hypertension 0.51, 0.15 – 1.48</li> </ul> |
| Mayer et al., 2021 (Spain)        | >15 years | 348596 | R | <ul style="list-style-type: none"> <li>○ Male 2.22, 1.90 – 2.60</li> <li>○ Hypertension 1.16, 0.98 – 1.37</li> <li>○ Diabetes 1.69, 1.43 – 1.99</li> <li>○ Obesity 1.08, 0.91 – 1.27</li> </ul>                                                                                                                                                                                                                            |  |                                                                                    |

|                                   |           |           |   |                                                                                                                                                                                                                                                                                                                                                                |  |  |
|-----------------------------------|-----------|-----------|---|----------------------------------------------------------------------------------------------------------------------------------------------------------------------------------------------------------------------------------------------------------------------------------------------------------------------------------------------------------------|--|--|
|                                   |           |           |   | <ul style="list-style-type: none"> <li>○ Chronic lung disease 1.18, 0.92 – 1.51</li> <li>○ Cancer 1.19, 0.99 – 1.43</li> <li>○ Smoking 0.98, 0.67 – 1.39</li> <li>○ Cerebrovascular disease 0.84, 0.50 – 1.33</li> </ul>                                                                                                                                       |  |  |
| Mehta et al., 2021 (USA)          | Mean 82.7 | 482323    | R | <ul style="list-style-type: none"> <li>○ Male 1.45, 1.41 – 1.49</li> <li>○ Cancer 1.20, 1.14 – 1.26</li> <li>○ Cardiovascular disease 1.12, 1.08 – 1.16</li> <li>○ Chronic renal disease 1.24, 1.20 – 1.29</li> <li>○ Diabetes 1.07, 1.04 – 1.10</li> <li>○ Malnutrition 1.02, 0.98 – 1.07</li> <li>○ Chronic respiratory disease 1.02, 0.99 – 1.05</li> </ul> |  |  |
| Menager et al., 2021 (France)     | 82        | Mean 88.8 | P | <ul style="list-style-type: none"> <li>○ Male 1.15, 0.29 – 4.63</li> <li>○ Cancer 4.35, 1.00 – 18.93</li> <li>○ Diabetes 0.38, 0.04 – 3.27</li> <li>○ Hypertension 1.17, 0.27 – 5.08</li> <li>○ Cerebrovascular disease 1.20, 0.23 – 6.44</li> </ul>                                                                                                           |  |  |
| Mendes et al., 2020 (Switzerland) | 235       | Mean 86   | R | <ul style="list-style-type: none"> <li>○ Male 3.33, 1.88 – 5.89</li> <li>○ Chronic lung disease 0.98, 0.40 – 2.39</li> <li>○ Smoking 0.93, 0.52 – 1.65</li> <li>○ Chronic kidney disease 1.10, 0.59 – 2.03</li> </ul>                                                                                                                                          |  |  |

|                                  |     |                           |    |                                                                                                                                                                                                                                                                      |  |                                                                                                                            |
|----------------------------------|-----|---------------------------|----|----------------------------------------------------------------------------------------------------------------------------------------------------------------------------------------------------------------------------------------------------------------------|--|----------------------------------------------------------------------------------------------------------------------------|
|                                  |     |                           |    | <ul style="list-style-type: none"> <li>○ Chronic liver disease 1.70, 0.71 – 4.08</li> <li>○ Diabetes 1.79, 0.96 – 3.36</li> <li>○ Stroke 1.02, 0.51 – 2.02</li> <li>○ Hypertension 1.18, 0.64 – 2.17</li> </ul>                                                      |  |                                                                                                                            |
| Messika et al., 2021 (France)    | 35  | Median<br>50.4            | R  | <ul style="list-style-type: none"> <li>○ Male 1.31, 0.19 – 9.02</li> <li>○ Age (continuous) 1.02, 0.94 – 1.10)</li> </ul>                                                                                                                                            |  | <ul style="list-style-type: none"> <li>○ Male 1.60, 0.40 – 6.46</li> <li>○ Age (continuous) 1.03, (0.98 – 1.10)</li> </ul> |
| Moghaddam et al., 2020 (Germany) | 33  | Median (IQR) =77 (38, 94) | CS | <ul style="list-style-type: none"> <li>○ Male 0.63, 0.10 – 4.01</li> <li>○ Hypertension 1.00, 0.15 – 6.53</li> <li>○ Diabetes 2.88, 0.39 – 21.29</li> <li>○ Cardiovascular disease 0.93, 0.16 – 5.45</li> <li>○ Cerebrovascular disease 0.88, 0.08 – 9.29</li> </ul> |  |                                                                                                                            |
| Morrison et al., 2020 (USA)      | 92  | Median<br>64              | R  | <ul style="list-style-type: none"> <li>○ Male 1.98, 0.73 – 5.33</li> <li>○ Asthma 1.11, 0.31 – 3.99</li> <li>○ Chronic lung disease 0.31, 0.03 – 2.89</li> <li>○ Diabetes 0.67, 0.27 – 1.62</li> <li>○ Hypertension 0.79, 0.29 – 2.13</li> </ul>                     |  |                                                                                                                            |
| Mostaza et al., 2020 (Spain)     | 404 | Mean<br>85.2              | R  | <ul style="list-style-type: none"> <li>○ Male 2.31, 1.51 – 3.52</li> <li>○ Hypertension 0.69, 0.44 – 1.08</li> <li>○ Diabetes 1.20, 0.77 – 1.88</li> <li>○ Chronic lung disease 0.72, 0.42 – 1.22</li> <li>○ Chronic renal failure 0.80, 0.45 – 1.43</li> </ul>      |  |                                                                                                                            |

|                                   |      |           |   |                                                                                                                                                                                                                                                                                                                                                                                                                                                                                     |                                                                                                                                                                                                                                                                                                                                                                                                                                                                                  |                                                                                                                                                                                                                                                                                                                                                                                                                                                                                                                                                         |
|-----------------------------------|------|-----------|---|-------------------------------------------------------------------------------------------------------------------------------------------------------------------------------------------------------------------------------------------------------------------------------------------------------------------------------------------------------------------------------------------------------------------------------------------------------------------------------------|----------------------------------------------------------------------------------------------------------------------------------------------------------------------------------------------------------------------------------------------------------------------------------------------------------------------------------------------------------------------------------------------------------------------------------------------------------------------------------|---------------------------------------------------------------------------------------------------------------------------------------------------------------------------------------------------------------------------------------------------------------------------------------------------------------------------------------------------------------------------------------------------------------------------------------------------------------------------------------------------------------------------------------------------------|
|                                   |      |           |   | <ul style="list-style-type: none"> <li>○ Chronic liver disease 1.05, 0.38 – 2.96</li> </ul>                                                                                                                                                                                                                                                                                                                                                                                         |                                                                                                                                                                                                                                                                                                                                                                                                                                                                                  |                                                                                                                                                                                                                                                                                                                                                                                                                                                                                                                                                         |
| Murthy et al., 2021 (Canada)      | 811  | Median 64 | R | <ul style="list-style-type: none"> <li>○ Age <math>\geq 60</math> vs <math>&lt; 60</math> = 3.69, 2.37 – 5.74</li> <li>○ Male 0.76, 0.54 – 1.08</li> <li>○ Hypertension 1.92, 1.36 – 2.72</li> <li>○ Diabetes 1.60, 1.10 – 2.32</li> <li>○ Chronic kidney disease 2.11, 1.34 – 3.32</li> <li>○ Asthma 1.34, 0.81 – 2.23</li> <li>○ Smoking 1.87, 0.92 – 3.81</li> </ul>                                                                                                             |                                                                                                                                                                                                                                                                                                                                                                                                                                                                                  | <ul style="list-style-type: none"> <li>○ Age <math>&gt; 70</math> vs <math>\leq 70</math> = 2.07, 1.09 – 3.93</li> <li>○ Male 1.63, 1.22 – 2.19</li> <li>○ Hypertension 1.06, 0.80 – 1.41</li> <li>○ Diabetes 1.24, 0.90 – 1.71</li> <li>○ Cardiovascular disease 0.94, 0.66 – 1.23</li> <li>○ Chronic kidney disease 3.29, 2.12 – 5.08</li> <li>○ Chronic liver disease 1.30, 0.63 – 2.70</li> <li>○ Asthma 1.09, 0.70 – 1.69</li> <li>○ Smoking 1.13, 0.58 – 2.20</li> <li>○ Obesity 2.85, 1.19 – 6.79</li> <li>○ Cancer 1.29, 0.60 – 2.74</li> </ul> |
| Nachega et al., 2020 (Congo)      | 766  | Median 46 | R | <ul style="list-style-type: none"> <li>○ Male 1.50, 0.97 – 2.32</li> <li>○ Age <math>\geq 60</math> vs <math>&lt; 60</math> = 6.86, 4.43 – 10.64</li> <li>○ Hypertension 3.15, 2.04 – 4.85</li> <li>○ Cardiovascular disease 4.78, 2.20 – 10.37</li> <li>○ Diabetes 3.53, 2.16 – 5.77</li> <li>○ Obesity 6.81, 3.48 – 13.33</li> <li>○ Chronic lung disease 1.39, 0.47 – 4.11</li> <li>○ Chronic kidney disease 10.43, 2.30 – 47.31</li> <li>○ Cancer 5.11, 0.84 – 30.97</li> </ul> | <ul style="list-style-type: none"> <li>○ Age <math>\geq 60</math> vs <math>&lt; 60</math> = 4.76, 3.31 – 6.85</li> <li>○ Male 1.39, 0.97 – 1.98</li> <li>○ Hypertension 3.66, 2.57 – 5.21</li> <li>○ Cardiovascular disease 7.77, 3.49 – 17.28</li> <li>○ Obesity 4.27, 2.22 – 8.23</li> <li>○ Diabetes 5.15, 3.36 – 7.89</li> <li>○ Chronic lung disease 2.69, 1.22 – 5.91</li> <li>○ Chronic kidney disease 2.28, 0.51 – 10.27</li> <li>○ Cancer 4.57, 0.76 – 27.57</li> </ul> | ○                                                                                                                                                                                                                                                                                                                                                                                                                                                                                                                                                       |
| Nachtigall et al., 2020 (Germany) | 1904 | Median 73 | R | <ul style="list-style-type: none"> <li>○ Male 1.15, 0.90 – 1.47</li> <li>○ Diabetes 1.44, 1.04 – 1.98</li> </ul>                                                                                                                                                                                                                                                                                                                                                                    |                                                                                                                                                                                                                                                                                                                                                                                                                                                                                  | <ul style="list-style-type: none"> <li>○ Male 1.98, 1.58 – 2.49</li> <li>○ Age <math>\geq 60</math> vs <math>&lt; 60</math> = 1.79, 1.37 – 2.34</li> <li>○ Diabetes 2.05, 1.54 – 2.72</li> </ul>                                                                                                                                                                                                                                                                                                                                                        |

|                               |        |              |   |                                                                                                                                                                                                                                                                                                                                           |  |                                                                                                                                                                                    |
|-------------------------------|--------|--------------|---|-------------------------------------------------------------------------------------------------------------------------------------------------------------------------------------------------------------------------------------------------------------------------------------------------------------------------------------------|--|------------------------------------------------------------------------------------------------------------------------------------------------------------------------------------|
|                               |        |              |   | <ul style="list-style-type: none"> <li>○ Cancer 2.36, 1.49 – 3.74</li> <li>○ Cardiovascular disease 2.25, 1.76 – 2.88</li> <li>○ Lung disease 2.12, 1.52 – 2.97</li> </ul>                                                                                                                                                                |  | <ul style="list-style-type: none"> <li>○ Cancer 1.26, 0.78 – 2.05</li> <li>○ Cardiovascular disease 1.68, 1.34 – 2.11</li> <li>○ Chronic lung disease 1.78, 1.29 – 2.45</li> </ul> |
| Nakamura et al., 2020 (Japan) | 32     | Median<br>74 | R | <ul style="list-style-type: none"> <li>○ Age &gt;70 vs ≤70 = 2.00, 0.41 – 9.74</li> <li>○ Male 7.50, 0.81 – 69.7</li> <li>○ Smoking 0.60, 0.13 – 2.67</li> <li>○ Diabetes 1.59, 0.29 – 8.87</li> <li>○ Hypertension 2.40, 0.54 – 10.69</li> <li>○ Chronic lung disease 2.11, 0.25 – 17.49</li> <li>○ Asthma 2.00, 0.11 – 35.41</li> </ul> |  |                                                                                                                                                                                    |
| Namendys-Silva, 2021 (Mexico) | 164    | Mean<br>57.3 | R | <ul style="list-style-type: none"> <li>○ Age (continuous) 1.04, 1.01 – 1.07</li> <li>○ Hypertension 2.41, 1.26 – 4.62</li> <li>○ Diabetes 3.03, 1.51 – 6.09</li> <li>○ Smoking 0.75, 0.32 – 1.80</li> <li>○ Chronic lung disease 2.85, 0.29 – 28.02</li> <li>○ Chronic renal failure 0.45, 0.08 – 2.54</li> </ul>                         |  |                                                                                                                                                                                    |
| Ng et al., 2020 (USA)         | 10,482 |              | R | <ul style="list-style-type: none"> <li>○ Male 1.39, 1.23 – 1.58</li> <li>○ Diabetes 1.16, 1.02 – 1.32</li> <li>○ Hypertension 0.84, 0.73 – 0.98</li> <li>○ Cancer 1.30, 1.07 – 1.57</li> </ul>                                                                                                                                            |  |                                                                                                                                                                                    |

|                               |      |              |   |                                                                                                                                                                                                                                                                                                                            |                                                                                                                                                                    |                                                                                                                                                                                                                                                                                       |
|-------------------------------|------|--------------|---|----------------------------------------------------------------------------------------------------------------------------------------------------------------------------------------------------------------------------------------------------------------------------------------------------------------------------|--------------------------------------------------------------------------------------------------------------------------------------------------------------------|---------------------------------------------------------------------------------------------------------------------------------------------------------------------------------------------------------------------------------------------------------------------------------------|
| Nie et al., 2020<br>(China)   | 45   | Median<br>66 | R | <ul style="list-style-type: none"> <li>Male 6.19, 0.71 – 54.16</li> <li>Smoking 1.22, 0.26 – 5.72</li> <li>Hypertension 5.69, 1.32 – 24.54</li> <li>Diabetes 3.88, 0.65 – 22.96</li> </ul>                                                                                                                                 |                                                                                                                                                                    |                                                                                                                                                                                                                                                                                       |
| Nie Y et al., 2020<br>(China) |      |              |   |                                                                                                                                                                                                                                                                                                                            | <ul style="list-style-type: none"> <li>Male 0.84, 0.51 – 1.38</li> <li>Cardiovascular disease 0.81, 0.31 – 2.14</li> <li>Hypertension 0.49, 0.16 – 1.45</li> </ul> |                                                                                                                                                                                                                                                                                       |
| Nunez-Gil, 2021<br>(Spain)    | 2798 | Median<br>67 | R | <ul style="list-style-type: none"> <li>Cardiovascular disease 3.58, 2.95 – 4.34</li> </ul>                                                                                                                                                                                                                                 |                                                                                                                                                                    |                                                                                                                                                                                                                                                                                       |
| O'Horo et al., 2021<br>(USA)  | 7217 | Median<br>39 | R |                                                                                                                                                                                                                                                                                                                            |                                                                                                                                                                    | <ul style="list-style-type: none"> <li>Male 0.84, 0.55 – 1.30</li> <li>Smoking 1.17, 0.73 – 1.86</li> <li>Age <math>\geq 65</math> vs <math>&lt; 65</math> = 1.55, 0.31 – 7.80</li> </ul>                                                                                             |
| Okoh et al., 2020<br>(USA)    | 416  | Median<br>62 | R | <ul style="list-style-type: none"> <li>Age 1.04, 1.01 – 1.06</li> <li>Male 1.99, 1.19 – 3.37</li> <li>Hypertension 2.21, 1.23 – 4.04</li> <li>Chronic kidney disease 3.43, 1.78 – 6.80</li> <li>Diabetes 1.19, 0.78 – 1.83</li> <li>Cerebrovascular disease 2.07, 0.95 – 4.51</li> <li>Cancer 2.72, 1.11 – 6.65</li> </ul> |                                                                                                                                                                    |                                                                                                                                                                                                                                                                                       |
| Oto et al., 2021<br>(Turkey)  | 109  | Mean<br>48.4 | R | <ul style="list-style-type: none"> <li>Age <math>&gt; 60</math> vs <math>\leq 60</math> = 2.74, 0.81 – 9.27</li> <li>Male 0.50, 0.16 – 1.55</li> <li>Diabetes 1.37, 0.39 – 4.82</li> <li>Hypertension 1.15, 0.29 – 4.51</li> </ul>                                                                                         |                                                                                                                                                                    | <ul style="list-style-type: none"> <li>Age <math>&gt; 60</math> vs <math>\leq 60</math> = 5.75, 1.33 – 24.88</li> <li>Male 0.67, 0.26 – 1.72</li> <li>Diabetes 1.73, 0.61 – 4.90</li> <li>Hypertension 2.24, 0.61 – 8.34</li> <li>Cardiovascular disease 2.33, 0.75 – 7.21</li> </ul> |

|                               |      |              |   |                                                                                                                                                                                                                                                                                                                                          |                                                                                                                                                                                                                                                      |  |
|-------------------------------|------|--------------|---|------------------------------------------------------------------------------------------------------------------------------------------------------------------------------------------------------------------------------------------------------------------------------------------------------------------------------------------|------------------------------------------------------------------------------------------------------------------------------------------------------------------------------------------------------------------------------------------------------|--|
|                               |      |              |   | <ul style="list-style-type: none"> <li>○ Cardiovascular disease 3.70, 1.04 – 13.08</li> </ul>                                                                                                                                                                                                                                            |                                                                                                                                                                                                                                                      |  |
| Ouldali et al., 2021 (France) | 397  | Children     | P |                                                                                                                                                                                                                                                                                                                                          | <ul style="list-style-type: none"> <li>○ Male 0.5, 0.2 – 1.3</li> <li>○ Asthma 1.4, 0.2 – 5.3</li> <li>○ Chronic respiratory disease 5.3, 0.7 – 26.3</li> <li>○ Cardiovascular disease 2.1, 0.1 – 13.1</li> <li>○ Obesity 2.5, 0.1 – 16.6</li> </ul> |  |
| Ozdemir et al., 2021 (Turkey) | 350  | Median<br>55 | R | <ul style="list-style-type: none"> <li>○ Male 0.88, 0.49 – 1.57</li> <li>○ Smoking 0.99, 0.54 – 1.80</li> <li>○ Hypertension 3.02, 1.67 – 5.45</li> <li>○ Diabetes 2.36, 1.23 – 4.53</li> <li>○ Chronic kidney disease 6.39, 2.35 – 12.57</li> <li>○ Chronic lung disease 2.47, 1.17 – 5.18</li> </ul>                                   |                                                                                                                                                                                                                                                      |  |
| Ozturk ey al., 2020 (Turkey)  | 1210 | Median<br>61 | R | <ul style="list-style-type: none"> <li>○ Male 1.57, 1.12 – 2.19</li> <li>○ Diabetes 1.94, 1.40 – 2.70</li> <li>○ Hypertension 2.56, 1.75 – 3.76</li> <li>○ Chronic lung disease 2.10, 1.38 – 3.21</li> <li>○ Cancer 1.57, 0.81 – 3.04</li> <li>○ Chronic liver disease 2.49, 0.64 – 9.27</li> <li>○ Smoking 0.93, 0.65 – 1.33</li> </ul> |                                                                                                                                                                                                                                                      |  |
| Park et al., 2020a (Korea)    | 954  | Median<br>55 | R | <ul style="list-style-type: none"> <li>○ Male 2.03, 1.29 – 3.20</li> <li>○ Asthma 2.13, 0.74 – 6.13</li> <li>○ Chronic lung disease 1.05, 0.26 – 4.30</li> </ul>                                                                                                                                                                         |                                                                                                                                                                                                                                                      |  |



|                                  |      |                |   |                                                                                                                                                                                                                                                                                                                                                                          |  |                                                                                                                                                                                                                                                                   |
|----------------------------------|------|----------------|---|--------------------------------------------------------------------------------------------------------------------------------------------------------------------------------------------------------------------------------------------------------------------------------------------------------------------------------------------------------------------------|--|-------------------------------------------------------------------------------------------------------------------------------------------------------------------------------------------------------------------------------------------------------------------|
|                                  |      |                |   | <ul style="list-style-type: none"> <li>○ Chronic kidney disease 2.19, 0.85 – 5.63</li> <li>○ Cancer 2.12, 0.94 – 4.76</li> <li>○ Diabetes 2.43, 1.51 – 3.90</li> <li>○ Hypertension 1.48, 0.91 – 2.40</li> </ul>                                                                                                                                                         |  |                                                                                                                                                                                                                                                                   |
| Park et al., 2020b (South Korea) | 1005 | Median<br>72   | R | <ul style="list-style-type: none"> <li>○ Male 2.11, 1.22 – 3.65</li> <li>○ Hypertension 1.36, 0.79 – 2.33</li> <li>○ Diabetes 2.56, 1.47 – 4.46</li> <li>○ Cardiovascular disease 1.37, 0.51 – 3.71</li> <li>○ Chronic lung disease 4.13, 1.08 – 15.85</li> <li>○ Chronic kidney disease 0.69, 0.14 – 3.25</li> <li>○ Chronic liver disease 2.19, 0.75 – 6.38</li> </ul> |  |                                                                                                                                                                                                                                                                   |
| Parlak et al., 2021 (Turkey)     | 343  | Mean<br>48.4   | R | <ul style="list-style-type: none"> <li>○ Male 1.06, 0.42 – 2.67</li> <li>○ Diabetes 0.43, 0.08 – 2.25</li> <li>○ Hypertension 0.82, 0.23 – 2.98</li> <li>○ Chronic lung disease 1.17, 0.22 – 6.16</li> <li>○ Chronic kidney disease 34.84, 4.11 – 295.58</li> </ul>                                                                                                      |  | <ul style="list-style-type: none"> <li>○ Male 1.24, 0.68 – 2.26</li> <li>○ Diabetes 0.53, 0.18 – 1.52</li> <li>○ Hypertension 1.05, 0.45 – 2.44</li> <li>○ Chronic lung disease 1.77, 0.51 – 6.14</li> <li>○ Chronic kidney disease 5.39, 0.87 – 33.22</li> </ul> |
| Pascual et al., 2020 (Spain)     | 24   | Median<br>66.5 | R | <ul style="list-style-type: none"> <li>○ Male 0.97, 0.19 – 4.87</li> <li>○ Age <math>\geq 65</math> vs <math>&lt;65</math> = 6.00, 1.02 – 35.38</li> <li>○ Hypertension 0.83, 0.05 – 15.09</li> <li>○ Diabetes 0.36, 0.07 – 1.88</li> </ul>                                                                                                                              |  |                                                                                                                                                                                                                                                                   |

|                                 |     |             |   |                                                                                                                                                                                                                                                                                                                                                                                                                 |  |                                                                                                                                                                                                                                                                                                                                                                                                                |
|---------------------------------|-----|-------------|---|-----------------------------------------------------------------------------------------------------------------------------------------------------------------------------------------------------------------------------------------------------------------------------------------------------------------------------------------------------------------------------------------------------------------|--|----------------------------------------------------------------------------------------------------------------------------------------------------------------------------------------------------------------------------------------------------------------------------------------------------------------------------------------------------------------------------------------------------------------|
| Passamonti et al., 2020 (Italy) | 536 | adults      | R | <ul style="list-style-type: none"> <li>○ Age <math>\geq 60</math> vs <math>&lt;60 = 3.17, 2.01 - 4.98</math></li> <li>○ Male 1.39, 0.96 – 2.01</li> <li>○ Lung disease 1.39, 0.74 – 2.61</li> <li>○ Chronic liver disease 2.01, 1.00 – 4.04</li> <li>○ Chronic kidney disease 2.45, 1.30 – 4.64</li> <li>○ Diabetes 1.26, 0.76 – 2.09</li> </ul>                                                                |  |                                                                                                                                                                                                                                                                                                                                                                                                                |
| Patel et al., 2020 (UK)         | 645 | Mean 62     | R | <ul style="list-style-type: none"> <li>○ Hypertension 1.54, 1.02 – 2.32</li> <li>○ Cardiovascular disease 2.11, 1.34 – 3.36</li> <li>○ Chronic lung disease 1.22, 0.77 – 1.91</li> <li>○ Diabetes 1.29, 0.85 – 1.97</li> <li>○ Chronic kidney disease 2.29, 1.30 – 4.01</li> <li>○ Obesity 4.05, 1.71 – 9.61</li> <li>○ Chronic liver disease 2.88, 0.60 – 13.75</li> <li>○ Cancer 1.36, 0.71 – 2.58</li> </ul> |  | <ul style="list-style-type: none"> <li>○ Hypertension 1.26, 0.68 – 2.29</li> <li>○ Cardiovascular disease 0.66, 0.27 – 1.58</li> <li>○ Chronic lung disease 1.33, 0.69 – 2.54</li> <li>○ Diabetes 0.58, 0.31 – 1.09</li> <li>○ Chronic liver disease 0.89, 0.09 – 8.38</li> <li>○ Chronic kidney disease 0.11, 0.01 – 0.83</li> <li>○ Obesity 2.77, 1.18 – 6.49</li> <li>○ Cancer 0.39, 0.08 – 1.79</li> </ul> |
| Peiro et al., 2021 (Spain)      | 196 | Median 67.5 | R | <ul style="list-style-type: none"> <li>○ Male 1.14, 0.54 – 2.37</li> <li>○ Smoking 2.43, 1.11 – 5.33</li> <li>○ Hypertension 2.81, 1.33 – 5.93</li> <li>○ Diabetes 2.07, 0.95 – 4.49</li> <li>○ Cerebrovascular disease 2.95, 0.91 – 9.60</li> <li>○ Chronic kidney disease 8.07, 3.18 – 20.46</li> </ul>                                                                                                       |  |                                                                                                                                                                                                                                                                                                                                                                                                                |

|                                           |      |                |   |                                                                                                                                                                                                                                                       |  |  |
|-------------------------------------------|------|----------------|---|-------------------------------------------------------------------------------------------------------------------------------------------------------------------------------------------------------------------------------------------------------|--|--|
|                                           |      |                |   | ○ Chronic lung disease<br>3.76, 1.66 – 8.56                                                                                                                                                                                                           |  |  |
| Pepe et al., 2021<br>(Italy)              | 5746 |                | R | ○ Chronic kidney disease<br>2.47, 1.78 – 3.42                                                                                                                                                                                                         |  |  |
| Pinato et al., 2020<br>(UK, Italy, Spain) | 204  | Mean 69        | R | ○ Age $\geq 65$ vs $< 65$ = 3.07,<br>1.50 – 6.25<br>○ Smoking 1.64, 0.88 –<br>3.04                                                                                                                                                                    |  |  |
| Pineiro et al., 2021<br>(Spain)           | 237  | Median<br>35.5 | P | ○ Male 1.1, 0.3 – 4.02<br>○ Age $> 60$ vs $\leq 60$ = 4.16,<br>0.65 – 26.6<br>○ Hypertension 1.85, 0.6<br>– 5.66<br>○ Diabetes 3.09, 0.72 –<br>13.32<br>○ Chronic lung disease<br>3.08, 0.72 – 13.3<br>○ Chronic kidney disease<br>6.86, 0.76 – 61.67 |  |  |
| Pizzini et al., 2020<br>(Austria)         | 109  | Median<br>58   | P | ○ Male 6.65, 2.78 – 15.90                                                                                                                                                                                                                             |  |  |
| Plotnikow et al., 2020<br>(Argentina)     | 47   | Median<br>61   | P | ○ Male 0.55, 0.06 – 5.35<br>○ Hypertension 1.58, 0.27<br>– 9.31<br>○ Diabetes 1.35, 0.23 –<br>8.03<br>○ Chronic lung disease<br>0.81, 0.07 – 9.01                                                                                                     |  |  |
| Pongpirul et al., 2020<br>(Thailand)      | 195  | Median<br>37   | R | ○ Age $> 60$ vs $\leq 60$ = 3.24,<br>1.24 – 8.48<br>○ Male 2.02, 0.88 – 4.63<br>○ Smoking 0.78, 0.25 –<br>2.41<br>○ Alcohol 0.58, 0.22 –<br>1.49<br>○ Diabetes 11.74, 3.88 –<br>35.50                                                                 |  |  |

|                                      |       |           |   |                                                                                                                                                                                                                                                                                                                                                                                              |                          |  |
|--------------------------------------|-------|-----------|---|----------------------------------------------------------------------------------------------------------------------------------------------------------------------------------------------------------------------------------------------------------------------------------------------------------------------------------------------------------------------------------------------|--------------------------|--|
|                                      |       |           |   | ○ Hypertension 5.44, 2.30 – 12.83                                                                                                                                                                                                                                                                                                                                                            |                          |  |
| Prado-Galbarro et al., 2020 (Mexico) | 15529 |           | R | <ul style="list-style-type: none"> <li>○ Male (HR) 1.46, 1.03 – 1.04</li> <li>○ Chronic lung disease (HR) 1.28, 1.04 – 1.59</li> <li>○ Cardiovascular disease (HR) 0.85, 0.67 – 1.06</li> <li>○ Hypertension (HR) 1.27, 1.06 – 1.52</li> <li>○ Diabetes (HR) 1.43, 1.18 – 1.74</li> <li>○ Obesity (HR) 1.91, 1.59 – 2.29</li> <li>○ Chronic kidney disease (HR) 1.60, 1.29 – 2.00</li> </ul> |                          |  |
| Qian et al., 2020 (China)            | 82858 | Meidan 51 | R |                                                                                                                                                                                                                                                                                                                                                                                              | ○ Male 1.25, 1.20 – 1.29 |  |
| Qin L et al., 2020 (china)           | 548   |           | R | ○ Male 2.44, 1.50 – 3.95                                                                                                                                                                                                                                                                                                                                                                     |                          |  |
| Qin W et al., 2021a (china)          | 262   | Mean 63.5 | R | <ul style="list-style-type: none"> <li>○ Male 0.86, 0.36 – 2.03</li> <li>○ Hypertension 2.13, 0.90 – 5.03</li> <li>○ Diabetes 1.08, 0.35 – 3.35</li> <li>○ Stroke 4.46, 0.81 – 24.39</li> </ul>                                                                                                                                                                                              |                          |  |
| Qin W et al., 2021b (China)          | 749   | Mean 60   | R | <ul style="list-style-type: none"> <li>○ Male 3.15, 1.88 – 5.27</li> <li>○ Hypertension 2.03, 1.26 – 3.27</li> <li>○ Diabetes 1.49, 0.77 – 2.89</li> <li>○ Chronic lung disease 2.52, 1.20 – 5.29</li> <li>○ Chronic kidney disease 5.33, 1.25 – 22.74</li> </ul>                                                                                                                            |                          |  |

|                                         |      |                |   |                                                                                                                                                                                                                                                                 |  |  |
|-----------------------------------------|------|----------------|---|-----------------------------------------------------------------------------------------------------------------------------------------------------------------------------------------------------------------------------------------------------------------|--|--|
| Quisi et al., 2020<br>(Turkey))         | 349  | Median<br>56   | R | <ul style="list-style-type: none"> <li>○ Smoking 4.28, 2.14 – 8.58</li> <li>○ Chronic lung disease 5.05, 2.08 – 12.25</li> <li>○ Male 0.72, 0.36 – 1.45</li> </ul>                                                                                              |  |  |
| Raimondi et al., 2021<br>(Italy)        | 431  | Mean<br>67.6   | R | <ul style="list-style-type: none"> <li>○ Male 1.05, 0.47 – 2.37</li> <li>○ Smoking 2.17, 1.31 – 3.58</li> <li>○ Hypertension 3.09, 2.00 – 4.78</li> <li>○ Chronic kidney disease 2.56, 1.22 – 5.36</li> <li>○ Chronic lung disease 1.98, 1.04 – 3.97</li> </ul> |  |  |
| Ramaswamy et al.,<br>2020<br>(India)    | 230  | Median<br>42   | P | <ul style="list-style-type: none"> <li>○ Male 1.12, 0.47 – 2.68</li> <li>○ Age &gt;60 vs ≤60 = 1.90, 0.66 – 5.65</li> <li>○ Smoking 1.12, 1.07 – 1.18</li> <li>○ Diabetes 2.02, 0.69 – 5.91</li> <li>○ Hypertension 1.26, 0.35 – 4.59</li> </ul>                |  |  |
| Ramos-Rincon et al.,<br>2020<br>(Spain) | 2772 | Median<br>86.3 | R | <ul style="list-style-type: none"> <li>○ Male 1.27, 1.01 – 1.59</li> <li>○ Obesity 1.24, 1.00 – 1.54</li> <li>○ Hypertension 0.96, 0.81 – 1.14</li> <li>○ Dibetes 1.09, 0.92 – 1.30</li> <li>○ Cancer 1.21, 0.97 – 1.51</li> </ul>                              |  |  |
| Rastad et al., 2021<br>(Iran)           | 520  |                | R | <ul style="list-style-type: none"> <li>○ Age ≥65 vs &lt;65 = 1.62, 0.60 – 4.41</li> <li>○ Male 2.94, 0.95 – 9.15</li> <li>○ Hypertension 1.12, 0.43 – 2.89</li> </ul>                                                                                           |  |  |

|                                     |                                  |     |   |                                                                                                                                                                                                                                                                                                                                                                                                                                                                                                                                                                                                      |                                                                                                                                                                                                                                                  |                                                                                                                                                                                |
|-------------------------------------|----------------------------------|-----|---|------------------------------------------------------------------------------------------------------------------------------------------------------------------------------------------------------------------------------------------------------------------------------------------------------------------------------------------------------------------------------------------------------------------------------------------------------------------------------------------------------------------------------------------------------------------------------------------------------|--------------------------------------------------------------------------------------------------------------------------------------------------------------------------------------------------------------------------------------------------|--------------------------------------------------------------------------------------------------------------------------------------------------------------------------------|
|                                     |                                  |     |   | <ul style="list-style-type: none"> <li>○ Diabetes 1.89, 0.73 – 4.90</li> </ul>                                                                                                                                                                                                                                                                                                                                                                                                                                                                                                                       |                                                                                                                                                                                                                                                  |                                                                                                                                                                                |
|                                     |                                  |     |   | <ul style="list-style-type: none"> <li>○</li> </ul>                                                                                                                                                                                                                                                                                                                                                                                                                                                                                                                                                  |                                                                                                                                                                                                                                                  |                                                                                                                                                                                |
| Recinella et al., 2020<br>(Bologna) | 76–91)<br><br>Median<br>83 years | 109 | P | <ul style="list-style-type: none"> <li>○ Age continuous</li> <li>○ nonsurvivors mean 85.5 [79–86.7] <ul style="list-style-type: none"> <li>○ survivors mean 79</li> </ul> </li> <li>○ Male 1.11 (.52-2.4)</li> <li>○ Charleston Comorbidity Index nonsurvivors mean 4.5, 2.2-8.7</li> <li>○ Cognitive Impairment 3.62, 1.6-8.1</li> <li>○ Coronary Heart Disease 1.03, .34-3.13</li> <li>○ Atrial Hypertension ∞</li> <li>○ Diabetes .57, .22-1.5</li> <li>○ Previous stroke 2.55, .89-7.34</li> <li>○ Chronic Kidney Disease .78, .3-2.03</li> <li>○ Chronic Heart Failure 1.45, .51-4.1</li> </ul> |                                                                                                                                                                                                                                                  |                                                                                                                                                                                |
| Ren et al., 2020<br>(Wuhan, China)  | 34-61<br>Median<br>50.0          | 129 | R | <ul style="list-style-type: none"> <li>○ Age ≥ 65 vs &lt;65 20.96, 3.69-119.16</li> </ul>                                                                                                                                                                                                                                                                                                                                                                                                                                                                                                            | <ul style="list-style-type: none"> <li>○ Age 65 vs &lt;65 5.81, 2.14-15.78</li> <li>○ Male .54, .25-1.15</li> <li>○ Hypertension 3.29, 1.42-7.63</li> <li>○ Diabetes 1.89, .65- 5.48</li> <li>○ Cardiovascular disease 4.63 .41-52.63</li> </ul> |                                                                                                                                                                                |
| Rieg et al., 2020<br>(Germany)      | 54-79<br>Median<br>65 years      | 213 | R | <ul style="list-style-type: none"> <li>○ Age continuous</li> <li>○ Nonsurvivors median 70</li> <li>○ Survivors median 61</li> </ul>                                                                                                                                                                                                                                                                                                                                                                                                                                                                  |                                                                                                                                                                                                                                                  | <ul style="list-style-type: none"> <li>○ Age continuous</li> <li>○ Admission in ICU median 65</li> <li>○ Non ICU admitted median 65</li> <li>○ Male 2.48, 1.32-4.64</li> </ul> |

|                                           |                                       |       |    |                                                                                                                                                                                                                                                                                                                                                                                                                                                                                                                                         |                                                                                                                                                                                                                                                                                                     |                                                                                                                                                                                |
|-------------------------------------------|---------------------------------------|-------|----|-----------------------------------------------------------------------------------------------------------------------------------------------------------------------------------------------------------------------------------------------------------------------------------------------------------------------------------------------------------------------------------------------------------------------------------------------------------------------------------------------------------------------------------------|-----------------------------------------------------------------------------------------------------------------------------------------------------------------------------------------------------------------------------------------------------------------------------------------------------|--------------------------------------------------------------------------------------------------------------------------------------------------------------------------------|
| Rivera-Izquierdo et al., 2020 (Spain)     | 24-97<br>Mean<br>64.7<br>Median<br>67 | 238   | R  | <ul style="list-style-type: none"> <li>○ Age <math>\geq 60</math> vs <math>&lt; 60</math> 6.53, 1.88-22.7</li> <li>○ Male 1.49, .82-2.71</li> <li>○ Smoking .57, .16-2.07</li> <li>○ Hypertension 5.25, 2.69-10.26</li> <li>○ Diabetes 4.83, 2.5-9.3</li> <li>○ Cardiovascular Disease 12.72, 6.28-25.76</li> </ul>                                                                                                                                                                                                                     |                                                                                                                                                                                                                                                                                                     |                                                                                                                                                                                |
| Rivinius et al., 2020 (Germany)           | Mean<br>58.6                          | 21    | CS |                                                                                                                                                                                                                                                                                                                                                                                                                                                                                                                                         | <ul style="list-style-type: none"> <li>○ Age <math>&gt; 60</math> vs <math>\leq 60</math> 15.75, 1.42-174.25</li> </ul>                                                                                                                                                                             |                                                                                                                                                                                |
| Roberts et al., 2020 (Massachusetts, USA) | Median<br>58 IQR<br>50-66             | 52    | R  |                                                                                                                                                                                                                                                                                                                                                                                                                                                                                                                                         |                                                                                                                                                                                                                                                                                                     | <ul style="list-style-type: none"> <li>○ Age continuous</li> <li>○ Admission in ICU median 61</li> <li>○ Non ICU admitted median 50</li> <li>○ Male 2.33, .62- 8.72</li> </ul> |
| Gostner et al., 2020 (Sweden)             | Mean<br>51.3                          | 34    | CS |                                                                                                                                                                                                                                                                                                                                                                                                                                                                                                                                         | <ul style="list-style-type: none"> <li>○ Age continuous <ul style="list-style-type: none"> <li>○ Severe mean 61.3</li> <li>○ Mild mean 51.3</li> </ul> </li> <li>○ Any comorbidity 8.94, 1.56-51.18</li> <li>○ Diabetes 6.46, .68-61.16</li> <li>○ Coronary Heart Disease 2.63, .24-28.2</li> </ul> | <ul style="list-style-type: none"> <li>○</li> </ul>                                                                                                                            |
| Rodilla et al., 2021 (Spain)              | Median<br>67.5                        | 12170 | P  | <ul style="list-style-type: none"> <li>○ Age <ul style="list-style-type: none"> <li>○ <math>&lt; 60.9</math> 1</li> <li>○ <math>\geq 60.9</math> and <math>&lt; 76.3</math> 2.0, 1.56-2.44</li> <li>○ <math>\geq 76.3</math> 4.7, 3.77-5.97</li> </ul> </li> <li>○ Male 1.6, 1.43-1.75</li> <li>○ Charlson Comorbidity Index <ul style="list-style-type: none"> <li>○ <math>&lt; 2</math> 1</li> <li>○ <math>\geq 2</math> and <math>&lt; 5</math>. 4.8, 3.82-6.02</li> <li>○ <math>\geq 5</math> 8.6, 6.72-10.9</li> </ul> </li> </ul> | <ul style="list-style-type: none"> <li>○</li> </ul>                                                                                                                                                                                                                                                 | <ul style="list-style-type: none"> <li>○</li> </ul>                                                                                                                            |

|                                      |                |      |    |                                                                                                                                                                                                                                                                                                                                                                                                                                       |                                                                                                                                                                                                             |  |
|--------------------------------------|----------------|------|----|---------------------------------------------------------------------------------------------------------------------------------------------------------------------------------------------------------------------------------------------------------------------------------------------------------------------------------------------------------------------------------------------------------------------------------------|-------------------------------------------------------------------------------------------------------------------------------------------------------------------------------------------------------------|--|
| Rodriguez et al., 2020<br>(Spain)    | Median<br>65.5 | 43   | P  | <ul style="list-style-type: none"> <li>○ Age continuous</li> <li>○ Survivors median 60.5</li> <li>○ Nonsurvivors median 67.5</li> <li>○ Male .56, .13-2.39</li> <li>○ Chronic Renal Failure 3, .17-53.05</li> <li>○ Obesity 2.44, .52-11.57</li> <li>○ Diabetes 1.5, .23-9.8</li> <li>○ Arterial Hypertension 3, .67-13.53</li> <li>○ Autoimmune Disease 6.75, .54-84.46</li> <li>○ Ischemic Heart Disease 3.25, .39-26.92</li> </ul> |                                                                                                                                                                                                             |  |
| Diaz et al., 2020<br>(United States) | n/a            | 3144 | R  | <ul style="list-style-type: none"> <li>○ Latino RR 1.05, 1.0-1.1</li> <li>○ Black RR 1.2, 1.08-1.3</li> <li>○ White RR .853, 1.08-1.04</li> <li>○ Unemployed RR .88, .80-.97</li> <li>○ Diabetes RR 1.0, .92-1.09</li> <li>○ Heart Disease RR 1.02, .92-1.1</li> <li>○ Hypertension RR 1.04, .99-1.0</li> <li>○ HIV RR .99, .92-1.05</li> </ul>                                                                                       |                                                                                                                                                                                                             |  |
| Molinero et al., 2020<br>(Spain)     | Mean<br>65.4   | 418  | CS | <ul style="list-style-type: none"> <li>○ Age continuous 1.08, 1.05-1.12</li> <li>○ Male .99, .61-1.64</li> </ul>                                                                                                                                                                                                                                                                                                                      | <ul style="list-style-type: none"> <li>○ Age continuous 1.01, .10-1.02</li> <li>○ Male 1.73, 1.17-2.57</li> <li>○ Chronic Kidney Disease 1.83, 1.04- 3.22</li> <li>○ Hypertension 1.48, 1.0-2.18</li> </ul> |  |



|                                 |              |     |   |                                                                                                                                                                                                                                                                                                                                                                                                                                                                                                                                                                                                                                   |                                                                                                                                                                                                                                                                                                                                                                                                                                                              |  |
|---------------------------------|--------------|-----|---|-----------------------------------------------------------------------------------------------------------------------------------------------------------------------------------------------------------------------------------------------------------------------------------------------------------------------------------------------------------------------------------------------------------------------------------------------------------------------------------------------------------------------------------------------------------------------------------------------------------------------------------|--------------------------------------------------------------------------------------------------------------------------------------------------------------------------------------------------------------------------------------------------------------------------------------------------------------------------------------------------------------------------------------------------------------------------------------------------------------|--|
|                                 |              |     |   | <ul style="list-style-type: none"> <li>○ Chronic Kidney Disease 4.64, 2.57-8.34</li> <li>○ Hypertension 5.64, 3.13-1087</li> <li>○ Diabetes 2.96, 1.75-4.99</li> <li>○ Obesity 1.12, .58-2.06</li> <li>○ Smoking .38, .09-.228</li> <li>○ Alcoholism .48, .02-.84</li> <li>○ Stroke 3.63, 1.48-8.67</li> <li>○ Asthma .42, .06-1.49</li> <li>○ Ischemic Heart Disease 1.02, .39-2.30</li> <li>○ Autoimmune Disease 3.7, 1.35-9.85</li> <li>○ Dementia 7.28, 3.74-14.40</li> <li>○ Lung Cancer 4.36, .45-42. 37</li> <li>○ Other Cancer 1.41, .49-3.49</li> <li>○ HIV 2.29, .07-28.64</li> <li>○ Anemia 2.71, 1.23-5.75</li> </ul> | <ul style="list-style-type: none"> <li>○ Diabetes 1.70, 1.07-2.74</li> <li>○ Obesity 2.06, 1.22-3.58</li> <li>○ Smoking 1.03, .52-2.10</li> <li>○ Alcoholism 7.59, 1.42-188.85</li> <li>○ Stroke 2.4, .97-6.88</li> <li>○ Asthma .89, .38-2.13</li> <li>○ Ischemic Heart Disease .86, .43-1.71</li> <li>○ Autoimmune Disease 2.92, 1.02-10.77</li> <li>○ Dementia 1.05, .55-2.0</li> <li>○ Other Cancer 1.05, .48-2.4</li> <li>○ HIV 1.5, .71-3.2</li> </ul> |  |
| Roedl et al., 2020<br>(Germany) | Median<br>69 | 223 | R | <ul style="list-style-type: none"> <li>○ Age continuous</li> <li>○ Nonsurvivors median 72</li> <li>○ Survivors median 65</li> <li>○ Male 1.78, .87-3.65</li> <li>○ BMI continuous</li> <li>○ Nonsurvivors median 26.2</li> <li>○ Survivors median 26.9</li> </ul>                                                                                                                                                                                                                                                                                                                                                                 |                                                                                                                                                                                                                                                                                                                                                                                                                                                              |  |

|                                           |                                           |        |    |                                                                                                                                                                                                                                                                                                                                                                                                                                 |  |  |
|-------------------------------------------|-------------------------------------------|--------|----|---------------------------------------------------------------------------------------------------------------------------------------------------------------------------------------------------------------------------------------------------------------------------------------------------------------------------------------------------------------------------------------------------------------------------------|--|--|
| Rokni et al., 2020<br>(Iran)              | Mean<br>49.8                              | 233    | CS | <ul style="list-style-type: none"> <li>○ Age continuous</li> <li>○ Nonsurvivors mean 65.3</li> <li>○ Survivors mean 47.6</li> <li>○ Male 1.47, .62-3.51</li> <li>○ Diabetes 1.47, .55-3.92</li> <li>○ Hypertension 1.94, .76-4.97</li> <li>○ Cardiovascular Disease 1, .28-3.58</li> <li>○ Pulmonary Disease 3.5, 1.13-10.82</li> <li>○ Renal Disease 2.96, .74-11.87</li> <li>○ Autoimmune Disease 7.81, 1.05-57.81</li> </ul> |  |  |
| Botero et al., 2020                       | Mean<br>52.6<br>Sd 17                     | 157    | R  | <ul style="list-style-type: none"> <li>○ Age <math>\leq 55</math> 1.08</li> <li>○ Age <math>&gt;55</math> 1.014</li> <li>○ Male .837, p-value=.473</li> <li>○ BMI 1.034, p-value=.59</li> </ul>                                                                                                                                                                                                                                 |  |  |
| Rosenthal et al., 2020<br>(United States) | (41-71)<br>Median<br>57<br>IQR<br>(41-71) | 64,781 | R  | <ul style="list-style-type: none"> <li>○ Age <math>\geq 65</math> vs <math>&lt; 65</math> 8.07, 7.62-8.55</li> <li>○ Male 1.18, 1.1-1.26</li> <li>○ Black vs White .75, .69-.82</li> <li>○ Congestive Heart Failure 1.37, 1.26-1.49</li> <li>○ Cerebrovascular Disease 1.39, 1.26-1.56</li> <li>○ Chronic Pulmonary Disease 1.16, 1.08-1.26</li> </ul>                                                                          |  |  |

|                               |                                                     |     |   |                                                                                                                                                                                                                                                                                                                                                                                                                                                                      |  |  |
|-------------------------------|-----------------------------------------------------|-----|---|----------------------------------------------------------------------------------------------------------------------------------------------------------------------------------------------------------------------------------------------------------------------------------------------------------------------------------------------------------------------------------------------------------------------------------------------------------------------|--|--|
|                               |                                                     |     |   | <ul style="list-style-type: none"> <li>○ Dementia 1.21, 1.11-1.32</li> <li>○ Diabetes 1.20, 1.12-1.28</li> <li>○ Malignancy 1.27, 1.09-1.47</li> <li>○ AIDS .68, .44-1.04</li> <li>○ Hypertension 1.08, .99-1.18</li> <li>○ Hyperlipidemia 1.11, 1.03- 1.19</li> </ul>                                                                                                                                                                                               |  |  |
| Rossi et al., 2020<br>(Italy) | (33.8-98.5)<br>Median<br>76.2<br>IQR<br>(68.2-82.6) | 590 | R | <ul style="list-style-type: none"> <li>○ Age continuous <ul style="list-style-type: none"> <li>○ Median nonsurvivors 72.9</li> <li>○ Median survivors 72.9</li> </ul> </li> <li>○ Male 1.56, 1.09-2.22</li> <li>○ Cardiovascular Disease 1.21, .78-1.88</li> <li>○ Hyperlipidemia 1.1, .78-1.54</li> <li>○ Diabetes 1.34, .91-1.96</li> <li>○ Chronic Kidney Disease 2.76, 1.73-4.41</li> <li>○ Stroke 2.18, .89-5.34</li> <li>○ Malignancy 1.4, .77-2.54</li> </ul> |  |  |

|                                   |                       |      |   |                                                                                                                                                                                                                                                                                                                                                                                                                                                                                             |  |                                                                                                                                                                                                                                                                                                                                              |
|-----------------------------------|-----------------------|------|---|---------------------------------------------------------------------------------------------------------------------------------------------------------------------------------------------------------------------------------------------------------------------------------------------------------------------------------------------------------------------------------------------------------------------------------------------------------------------------------------------|--|----------------------------------------------------------------------------------------------------------------------------------------------------------------------------------------------------------------------------------------------------------------------------------------------------------------------------------------------|
| Rottoli et al., 2020<br>(Italy)   | Mean<br>66.2          | 482  | R | <ul style="list-style-type: none"> <li>○ Age &lt;60 vs 60-69.9 2.55, 0.67–9.67</li> <li>○ Age &lt;60 vs 70-79.9 13.7, 4.35–43.5</li> <li>○ Age &lt;60 vs ≥ 80 35.0, 10.8–113</li> <li>○ Male 2.36, 1.26–4.43</li> <li>○ Hypertension 1.09, 0.56–2.15</li> <li>○ Diabetes 1.0, 0.48–2.05</li> <li>○ Cerebrovascular Disease 3.41, 1.61–7.26</li> <li>○ Moderate/Severe Renal Disease 2.35, 0.90–6.17</li> <li>○ Obesity 2.35, 1.17–4.75</li> <li>○ BMI continuous 1.09, 1.02–1.17</li> </ul> |  | <ul style="list-style-type: none"> <li>○ Male 1.54, 0.81–2.91</li> <li>○ Hypertension 1.61, 0.80–3.25</li> <li>○ Diabetes 1.55, 0.73–3.31</li> <li>○ Cerebrovascular Disease 0.52 0.13–2.05</li> <li>○ Moderate/severe Renal Disease 4.80, 1.83–12.6</li> <li>○ Obesity 5.28, 2.81–9.91</li> <li>○ BMI continuous 1.20, 1.12–1.28</li> </ul> |
| Russo et al., 2020<br>(Italy)     | Mean<br>66.9<br>Sd 15 | 414  | R | <ul style="list-style-type: none"> <li>○ Age continuous <ul style="list-style-type: none"> <li>○ nonsurvivors mean 71.75</li> <li>○ survivors mean 65.26</li> </ul> </li> <li>○ Male 1.8, 1.12-2.9</li> <li>○ Smoker 1.02, .59-1.76</li> <li>○ Hypertension 1.89, 1.16-3.07</li> <li>○ Diabetes 1.34, .82-2.19</li> <li>○ Obesity 1.32, .58-2.99</li> <li>○ Stroke .99, .45-2.19</li> <li>○ Chronic Kidney Disease 2.46, 1.41-4.29</li> </ul>                                               |  |                                                                                                                                                                                                                                                                                                                                              |
| Ruthrich et al., 2021<br>(Europe) | IQR 76–85             | 3071 | R | <ul style="list-style-type: none"> <li>○ Male 1.73, .55-5.36</li> <li>○ Cancer .56, .44-.72</li> </ul>                                                                                                                                                                                                                                                                                                                                                                                      |  |                                                                                                                                                                                                                                                                                                                                              |

|                                           |                           |      |   |                                                                                                                                                                                                                                                                                                                                                    |                                                                                                                                              |  |
|-------------------------------------------|---------------------------|------|---|----------------------------------------------------------------------------------------------------------------------------------------------------------------------------------------------------------------------------------------------------------------------------------------------------------------------------------------------------|----------------------------------------------------------------------------------------------------------------------------------------------|--|
| Rutten et al., 2020<br>(Netherlands)      | Mean<br>84<br>Sd 9.8      | 1538 | P | Hazard Ratio (HR)<br><ul style="list-style-type: none"> <li>Male 1.82, 1.54-2.15</li> <li>Dementia 1.26, 1.06-1.5</li> <li>Cardiovascular Disease 1.15, .97-1.35</li> <li>Cerebrovascular Disease 1.06, .89-1.25</li> <li>Diabetes .99, .82-1.19</li> <li>Chronic Respiratory Disease .92, .75-1.14</li> <li>Parkinson's 1.49, 1.11-2.0</li> </ul> |                                                                                                                                              |  |
| Saand et al., 2020<br>(USA)               | Median<br>68<br>IQR 58-77 | 495  | R | <ul style="list-style-type: none"> <li>Hazard Ratio (HR)</li> <li>Age <math>\geq 60</math> vs <math>&lt;60</math> 3.2, 1.79-5.79</li> <li>Male .73, .50-1.05</li> <li>BMI <math>\geq 30</math> vs <math>&lt;30</math> .79, .54-1.14</li> <li>Diabetes .82, .5-1.27</li> </ul>                                                                      |                                                                                                                                              |  |
| Sadeghi et al., 2020<br>(Iran)            | Mean<br>61.78<br>Sd 16.4  | 214  | R |                                                                                                                                                                                                                                                                                                                                                    | <ul style="list-style-type: none"> <li>Age mild mean 54.4</li> <li>Age severe mean 70.3</li> <li>Male mild vs severe .98, .27-2.5</li> </ul> |  |
| Saeed et al., 2020<br>(NY, United States) | Mean<br>68<br>Sd 12       | 2266 | R | <ul style="list-style-type: none"> <li>Age survivors mean 67</li> <li>Age nonsurvivors mean 74</li> <li>Male 1.34, 1.12-1.59</li> <li>Nonhispanic Black vs Nonhispanic White .78, .55-1.1</li> <li>Hispanic vs Nonhispanic White .81, .57-1.14</li> <li>Other vs White .89, .61-1.3</li> <li>BMI mean survivors 28.9</li> </ul>                    |                                                                                                                                              |  |

|                                    |                                 |     |   |                                                                                                                                                                                                                                                                                                                                                             |  |  |
|------------------------------------|---------------------------------|-----|---|-------------------------------------------------------------------------------------------------------------------------------------------------------------------------------------------------------------------------------------------------------------------------------------------------------------------------------------------------------------|--|--|
|                                    |                                 |     |   | <ul style="list-style-type: none"> <li>○ BMI mean nonsurvivors 28.2</li> <li>○ Hypertension .89, .68-1.16</li> <li>○ Charlson Comorbidity Index survivors 4 (2-8) Nonsurvivors 7 (4-10)</li> <li>○ Lung Disease 1.12, .93- 1.34</li> </ul>                                                                                                                  |  |  |
| Saez-Giménez et al., 2020 (Spain)  | Median 62.8<br>IQR 56.4-67.8    | 44  | R | <ul style="list-style-type: none"> <li>○ Age nonsurvivors median 62.9</li> <li>○ Male 2.23, .61-8.08</li> </ul>                                                                                                                                                                                                                                             |  |  |
| Saggi et al., 2020 (United States) | N/A                             | 75  | R | <ul style="list-style-type: none"> <li>○ Age 30-70 vs 71-76. 1.12, .45-2.70</li> <li>○ Age 30-70 vs 77-99. 2.17, .75-6.25</li> </ul>                                                                                                                                                                                                                        |  |  |
| Saha et al., 2021 (Bangladesh)     | Median 48                       | 168 | R | <ul style="list-style-type: none"> <li>○ Diabetes 1.37, .74-2.53</li> </ul>                                                                                                                                                                                                                                                                                 |  |  |
| Sai et al., 2021 (Wuhan, China)    | (38-93)<br>Mean 70.6<br>Sd 12.5 | 47  | R | <ul style="list-style-type: none"> <li>○ Age survivors mean 69.67</li> <li>○ Age nonsurvivors mean 70.64</li> <li>○ Male .34, .1-1.2</li> <li>○ Comorbidity 3.23, .35-29.6</li> <li>○ Hypertension .68, .2-2.33</li> <li>○ Diabetes 1.11, .32- 3.9</li> <li>○ Chronic Kidney Disease .09, .01-.78</li> <li>○ Chronic Heart Disease 1.4, .29-6.82</li> </ul> |  |  |

|                                     |                          |      |   |                                                                                                                                                                                                                                                                                                                                                                                                                                                                                                                                                                                                      |  |  |
|-------------------------------------|--------------------------|------|---|------------------------------------------------------------------------------------------------------------------------------------------------------------------------------------------------------------------------------------------------------------------------------------------------------------------------------------------------------------------------------------------------------------------------------------------------------------------------------------------------------------------------------------------------------------------------------------------------------|--|--|
|                                     |                          |      |   | <ul style="list-style-type: none"> <li>○ Chronic Liver Disease .41, .07-2.35</li> <li>○ Malignancy 1.49, .22-9.99</li> </ul>                                                                                                                                                                                                                                                                                                                                                                                                                                                                         |  |  |
| Saifi et al., 2021<br>(Italy)       | (90-101)<br>Median<br>93 | 34   | R | <ul style="list-style-type: none"> <li>○ Age survivors median 93<br/>nonsurvivors median 93</li> <li>○ Male 1, .26-3.85</li> <li>○ BMI survivors median 25.2<br/>BMI nonsurvivors median 23.2</li> <li>○ Hypertension .87, .15-5.06</li> <li>○ Chronic Kidney Disease .45, .11-1.85</li> <li>○ Chronic Heart Failure .45, .11-1.85</li> <li>○ Arrhythmias 1.18, .27-5.18</li> <li>○ Dementia 1.18, .27-5.18</li> <li>○ Diabetes 1.85, .27-12.76</li> <li>○ Cerebrovascular Disease 1.85, .27-12.76</li> <li>○ Charlson Comorbidity Index survivors 5 (4.7-6)<br/>Nonsurvivors 5.5 (4-6.7)</li> </ul> |  |  |
| Salazer et al., 2021<br>(Argentina) | Mean<br>62<br>Sd 17      | 3529 | R | <ul style="list-style-type: none"> <li>○ Age mean survivors 58<br/>Age mean nonsurvivors 69</li> <li>○ Male .97, .84-1.1</li> </ul>                                                                                                                                                                                                                                                                                                                                                                                                                                                                  |  |  |

|                                       |                           |      |   |                                                                                                                                                                                                                                                                                         |                                                                                                                 |  |
|---------------------------------------|---------------------------|------|---|-----------------------------------------------------------------------------------------------------------------------------------------------------------------------------------------------------------------------------------------------------------------------------------------|-----------------------------------------------------------------------------------------------------------------|--|
|                                       |                           |      |   | <ul style="list-style-type: none"> <li>○ Hypertension 1.69, 1.46-1.95</li> <li>○ Diabetes 1.32, 1.12-1.56</li> <li>○ Cardiovascular Disease 2.09, 1.68-2.6</li> <li>○ Chronic Pulmonary Disease 1.26, .98-1.63</li> <li>○ Immunodeficiency 1.35, .86-2.12</li> </ul>                    |                                                                                                                 |  |
| Saleh et al., 2021<br>(Egypt)         | (0-18)                    | 398  | P |                                                                                                                                                                                                                                                                                         | <ul style="list-style-type: none"> <li>○ Age continuous 1.07, .58-1.99</li> <li>○ Male 1.14, .68-2.3</li> </ul> |  |
| Sands et al., 2020<br>(United States) | Median<br>63              | 6180 | R | <ul style="list-style-type: none"> <li>○ Age continuous 1.07, 1.06-1.08</li> <li>○ Diabetes 1.57, 1.21-2.03</li> <li>○ Hypertension .63, .48-.82</li> <li>○ Obesity 1.41, 1.08-1.85</li> <li>○ Renal Failure .96, .71-1.29</li> <li>○ Congestive Heart Failure 1.19, .9-1.58</li> </ul> |                                                                                                                 |  |
| Sano et al., 2020<br>(Japan)          | (76-98)<br>Mean<br>87.8   | 26   | R | <ul style="list-style-type: none"> <li>○ Age <math>\geq 75</math> vs <math>&lt;75</math> 1.65, .23- 11.99</li> </ul>                                                                                                                                                                    |                                                                                                                 |  |
| Santos et al., 2020<br>(Spain)        | Mean<br>75.3<br>IQR 68-83 | 38   | P | <ul style="list-style-type: none"> <li>○ Age <math>&gt;65</math> vs <math>\leq 65</math> 1.08, .1-11.76</li> <li>○ Male 3.6, .77-7.0</li> <li>○ Hypertension 9, 1-80.8</li> <li>○ Diabetes 33, 3.46-314.55</li> <li>○ Dyslipidaemia 12, 1.33-108.03</li> </ul>                          |                                                                                                                 |  |



|                                        |                          |            |   |                                                                                                                                                                                                                                                                                   |                                                                                                                                                                                                            |  |
|----------------------------------------|--------------------------|------------|---|-----------------------------------------------------------------------------------------------------------------------------------------------------------------------------------------------------------------------------------------------------------------------------------|------------------------------------------------------------------------------------------------------------------------------------------------------------------------------------------------------------|--|
| M. Santos et al., 2020<br>(Brazil)     | N/a                      | 46285      | R | Hazard Ratio (HR)<br><ul style="list-style-type: none"> <li>Diabetes 1.17, 1.11-1.24</li> <li>Chronic Kidney Disease 1.11, 1.43-1.58</li> <li>Asthma .71, .61-.81</li> <li>Cardiopathy 1.14, 1.08-1.2</li> <li>Race: Black or mixed vs White or yellow 1.5, 1.43- 1.58</li> </ul> |                                                                                                                                                                                                            |  |
| Santus et al., 2020<br>(Italy)         | Median 66<br>IQR (55-76) | 412        | P | (HR)<br><ul style="list-style-type: none"> <li>Age &gt;65 vs ≤ 65 3.41, 2.0-5.78</li> <li>Male 1.17, .73-1.86</li> </ul>                                                                                                                                                          | <ul style="list-style-type: none"> <li>Age continuous Severe median 75<br/>Mild median 67</li> </ul> Odds Ratio (severe vs mild)<br><ul style="list-style-type: none"> <li>Male 2.22, 1.05-4.72</li> </ul> |  |
| Sapey et al., 2020<br>(United Kingdom) | Median 73<br>IQR (58-84) | 2217       | R | (HR)<br><ul style="list-style-type: none"> <li>Age continuous 2.4, 1.8-3.2</li> <li>Male 1.3, 1.1-1.5</li> <li>Comorbidity (≥3) 2.3, 1.7-3.0</li> <li>Asian vs White. 1.4, 1.2- 1.8</li> <li>Black vs White 1.1, .8- 1.5</li> <li>Mixed vs White 1.9, .9-3.9</li> </ul>           |                                                                                                                                                                                                            |  |
| Scarfo et al., 2020<br>(Europe)        | (58-84)<br>Median 72     | 121        | R |                                                                                                                                                                                                                                                                                   | <ul style="list-style-type: none"> <li>Age ≥65 vs &lt;65 3.72, 1.79-7.71</li> <li>Male .73, .34-1.57</li> <li>Comorbidities &gt;2 vs ≤2 .99, .46-2.11</li> </ul>                                           |  |
| Schultze et al., 2020<br>(England)     | (18-106)<br>Median 53    | 33,356,521 | R | (HR)<br><ul style="list-style-type: none"> <li>Asthma 1.55, 1.13-2.21</li> </ul>                                                                                                                                                                                                  |                                                                                                                                                                                                            |  |

|                                       |                              |     |   |                                                                                                                                                                                                                                                                                                                                                                                                  |                                                                                                                                                                                                              |  |
|---------------------------------------|------------------------------|-----|---|--------------------------------------------------------------------------------------------------------------------------------------------------------------------------------------------------------------------------------------------------------------------------------------------------------------------------------------------------------------------------------------------------|--------------------------------------------------------------------------------------------------------------------------------------------------------------------------------------------------------------|--|
| Wang F et al., 2021<br>(China)        | Median<br>46<br>IQR<br>32-57 | 625 | R |                                                                                                                                                                                                                                                                                                                                                                                                  | <ul style="list-style-type: none"> <li>○ Age continuous 1.07, 1.03-1.10</li> <li>○ Hypertension .80, .30-2.13</li> <li>○ Diabetes 2.13, .59-7.68</li> <li>○ Coronary Heart Disease 4.6, .78-27.20</li> </ul> |  |
| Wang Y et al., 2020<br>(Wuhan, China) | Median<br>68<br>IQR<br>61-75 | 242 | R | <ul style="list-style-type: none"> <li>○ Age continuous<br/>Survivor median 66<br/>Nonsurvivor median 69</li> <li>○ Male 1.71, .96-3.04</li> <li>○ Cardiovascular Disease 1.14, .48-2.71</li> <li>○ Chronic Kidney Disease .49, .11-2.24</li> <li>○ Cerebrovascular Disease 2.77, .61-12.51</li> </ul>                                                                                           |                                                                                                                                                                                                              |  |
| Yao et al., 2021<br>(Wuhan, China)    | Mean<br>62.7<br>Sd<br>11.09  | 97  | R | <ul style="list-style-type: none"> <li>○ Age continuous<br/>Survivor mean 60.8<br/>Nonsurvivor mean 69.8</li> <li>○ BMI continuous<br/>Survivor mean 23.09<br/>Nonsurvivor mean 24.95</li> <li>○ Smoker 1.22, .12-12.34</li> <li>○ Diabetes 2.98, 1.03-8.64</li> <li>○ Hypertension 2, .75-5.3</li> <li>○ Cardiovascular Disease 2.67, .89-7.99</li> <li>○ Lung Disease .69, .14-3.45</li> </ul> |                                                                                                                                                                                                              |  |

|                                           |                                    |      |   |                                                                                                                                                                                                                                                                                                                                                                                                                                                                                                                        |                                                                                                                                                                                       |  |
|-------------------------------------------|------------------------------------|------|---|------------------------------------------------------------------------------------------------------------------------------------------------------------------------------------------------------------------------------------------------------------------------------------------------------------------------------------------------------------------------------------------------------------------------------------------------------------------------------------------------------------------------|---------------------------------------------------------------------------------------------------------------------------------------------------------------------------------------|--|
| Zhou et al., 2020<br>(Wuhan, China)       | n/a                                | 110  | R |                                                                                                                                                                                                                                                                                                                                                                                                                                                                                                                        | <ul style="list-style-type: none"> <li>○ Age 40-60 vs <math>\leq 40</math> 12.28, 1.62-92.6</li> <li>○ Age <math>\geq 60</math> vs <math>\leq 40</math> 25.3, 3.68-173.783</li> </ul> |  |
| Ye et al., 2020<br>(Wuhan, China)         | Median<br>59.2<br>IQR<br>42.8-73.1 | 293  | R | <ul style="list-style-type: none"> <li>○ Age <math>\geq 65</math> vs <math>&lt;65</math>. 9.95, 5.76-17.19</li> <li>○ Male 1.82, 1.13-2.91</li> </ul><br>(HR) <ul style="list-style-type: none"> <li>○ Hypertension 2.88, 2-4.17</li> <li>○ Diabetes 1.83, 1.12-2.84</li> <li>○ Cerebrovascular Disease 2.41, 1.47-3.94</li> <li>○ Coronary Heart Disease 1.77, 1.01-3.1</li> <li>○ Chronic Renal Disease 2.16, .88-5.28</li> <li>○ Chronic Liver Disease 1.06, .43-2.58</li> <li>○ Malignancy 1.4, .6-3.18</li> </ul> |                                                                                                                                                                                       |  |
| Wang Z et al, 2020<br>(NY, United States) | n/a                                | 3273 | R | <ul style="list-style-type: none"> <li>○ Age continuous 1.08, <math>p&lt;.0001</math></li> <li>○ Male 1.06, <math>p=.698</math></li> <li>○ Race               <ul style="list-style-type: none"> <li>African American .95, <math>p=.815</math></li> <li>Asian 1.04, <math>p=.914</math></li> <li>Hispanic .93, <math>p=.723</math></li> <li>Other .99, <math>p=.975</math></li> </ul> </li> <li>○ Smoker 1.71, <math>p=.172</math></li> <li>○ BMI 1, <math>p=.791</math></li> </ul>                                    |                                                                                                                                                                                       |  |
| Wargny et al., 2021<br>(France)           | Mean<br>69.7<br>Sd 13.2            | 2796 | R | <ul style="list-style-type: none"> <li>○ Age continuous 1.84, 1.49-2.27</li> <li>○ Male 1.01, .7-1.45</li> </ul>                                                                                                                                                                                                                                                                                                                                                                                                       |                                                                                                                                                                                       |  |

|                                                    |                        |     |   |                                                                                                                                                                                                                                                                                                                                                             |                                                                                                                                                                                                                                          |  |
|----------------------------------------------------|------------------------|-----|---|-------------------------------------------------------------------------------------------------------------------------------------------------------------------------------------------------------------------------------------------------------------------------------------------------------------------------------------------------------------|------------------------------------------------------------------------------------------------------------------------------------------------------------------------------------------------------------------------------------------|--|
|                                                    |                        |     |   | <ul style="list-style-type: none"> <li>○ BMI continuous 1.03, .86-1.25</li> <li>○ Hypertension .84, .51-1.39</li> </ul>                                                                                                                                                                                                                                     |                                                                                                                                                                                                                                          |  |
| Chen et al., 2020<br>(USA, UK, Italy, Middle East) | Median 60<br>IQR 47-66 | 151 | R | <ul style="list-style-type: none"> <li>○ Age continuous 1.06, 1.01-1.11</li> <li>○ Male .79, .24-2.62</li> <li>○ Smoker .95, .03-29.82</li> <li>○ White vs Other Race 1.56, .45-5.42</li> <li>○ Obesity 1.10, .37-3.31</li> <li>○ Cardiovascular Disease .65, .15-2.71</li> <li>○ Diabetes 1.83, .57-5.87</li> <li>○ Hypertension 1.03, .34-3.09</li> </ul> |                                                                                                                                                                                                                                          |  |
| Wei et al., 2020a<br>(Wuhan, China)                | Median 61.5            | 566 | R | <ul style="list-style-type: none"> <li>○ Age continuous 1.09, 1.02-1.16</li> <li>○ Cardiovascular Disease 3.29, 1.66-6.54</li> <li>○ Heart Failure 4.78, 1.54-14.82</li> <li>○ Arrhythmia 1.38, .72-2.65</li> </ul>                                                                                                                                         |                                                                                                                                                                                                                                          |  |
| Wei X et al., 2020b<br>(Wuhan, China)              | Median 66<br>IQR 59-72 | 597 | R |                                                                                                                                                                                                                                                                                                                                                             | <ul style="list-style-type: none"> <li>○ Age continuous <ul style="list-style-type: none"> <li>○ Mild median 64</li> <li>○ Severe median 69</li> </ul> </li> <li>○ Male 1.6 1.12- 2.3</li> <li>○ Hypertension 2.37, 1.62-3.46</li> </ul> |  |
| Wei Z et al, 2021<br>(China)                       | Median 49<br>IQR 37-59 | 498 | R | ○                                                                                                                                                                                                                                                                                                                                                           | <ul style="list-style-type: none"> <li>○ Age &lt;65 vs ≥ 65 1.68, .55-5.07</li> <li>○ Male .86, .31-2.21</li> <li>○ Diabetes 2.85, 1.35-6.01</li> <li>○ Coronary Heart Disease 1.08, .25-4.62</li> </ul>                                 |  |

|                                                             |                       |         |   |                                                                                                                                                                                                                                                                                                                                                                                                                                                                                           |                                          |  |
|-------------------------------------------------------------|-----------------------|---------|---|-------------------------------------------------------------------------------------------------------------------------------------------------------------------------------------------------------------------------------------------------------------------------------------------------------------------------------------------------------------------------------------------------------------------------------------------------------------------------------------------|------------------------------------------|--|
|                                                             |                       |         |   |                                                                                                                                                                                                                                                                                                                                                                                                                                                                                           | ○ Chronic Kidney Disease 3.74, .67-20.88 |  |
| Wen et al., 2021<br>(Hubei, China)                          | Mean<br>53<br>Sd 15.7 | 476     | R | (HR)<br>○ Age continuous 1.09, 1.05-1.14<br>○ Male 1.38, .56-3.4<br>○ Hypertension 5.82, 2.60-13.07<br>○ Diabetes .82, .32-2.11                                                                                                                                                                                                                                                                                                                                                           |                                          |  |
| Williams et al., 2021<br>(China, Italy, Spain, Netherlands) | n/a                   | 876,959 | R | ○ Male 1.77, 1.73-1.8                                                                                                                                                                                                                                                                                                                                                                                                                                                                     |                                          |  |
| Betech et al., 2020<br>(Brazil)                             | (0-100)               | 113,214 | R | ○ Age <65 vs ≥ 65 1.28, .84-1.94<br>○ Male 1.24, 1.2-1.29<br>○ Diabetes 1.22, 1.17-1.27<br>○ Obesity 1.67, 1.52-1.82<br>○ Asthma .80, .71-.89<br>○ Cardiovascular Disease 1.12, 1.08-1.16<br>○ Hematologic Disease 1.19, 1.0-1.42<br>○ Chronic Liver Disease 1.72, 1.44-2.04<br>○ Chronic Renal Disease 2.0, 1.84-2.17<br>○ Immunosuppression 1.67, 1.52-1.82<br>○ Neurological Disease 1.64, 1.51-1.79<br>○ Geographic Location<br>○ N Brazil 2.06, 1.35-3.14<br>○ S Brazil .62, .40-.95 |                                          |  |

|                                      |                                       |      |   |                                                                                                                                                                                                                                           |                                                                                                                                                                                                        |                                                          |
|--------------------------------------|---------------------------------------|------|---|-------------------------------------------------------------------------------------------------------------------------------------------------------------------------------------------------------------------------------------------|--------------------------------------------------------------------------------------------------------------------------------------------------------------------------------------------------------|----------------------------------------------------------|
|                                      |                                       |      |   | <ul style="list-style-type: none"> <li>○ NE Brazil 2.19, 1.4-3.3</li> <li>○ SE Brazil 1.03, .68-1.57</li> <li>○ Midwest Brazil .84, .55-1.29</li> </ul>                                                                                   |                                                                                                                                                                                                        |                                                          |
| Wu et al., 2020<br>(Wuhan, China)    | (21-83)<br><br>Median 51<br>IQR 43-60 | 201  | R | (HR) <ul style="list-style-type: none"> <li>○ Age &lt;65 vs ≥ 65 6.17, 3.26-11.67</li> <li>○ Male .56, .30-1.05</li> <li>○ Hypertension 1.82, 1.13-2.95</li> <li>○ Diabetes 2.34, 1.35-1.05</li> </ul>                                    | (HR) <ul style="list-style-type: none"> <li>○ Age &lt;65 vs ≥ 65 3.26, 2.08-5.11</li> <li>○ Male 1.47, .92-2.36</li> <li>○ Hypertension 1.82, 1.13-2.95</li> <li>○ Diabetes 2.34, 1.35-4.05</li> </ul> |                                                          |
| Wu, F et al., 2020<br>(China)        | >40                                   | 1048 | R | ○ Chronic Obstructive Pulmonary Disease 7.56, 3.67-15.57                                                                                                                                                                                  | ○ Chronic Obstructive Pulmonary Disease 2.69, 1.37-5.29                                                                                                                                                | ○ Chronic Obstructive Pulmonary Disease 2.78, 1.35-5.73  |
| Wu, M et al., 2020<br>(China)        | Mean 57<br><br>IQR 45-67              | 334  | R |                                                                                                                                                                                                                                           | ○ Age <50 vs 51-63 1.8, .2-20.9                                                                                                                                                                        | ○ Age <50 vs 51-63 .7 (.1-4.8)<br>Age <50 vs >64 .1, 0-2 |
| Xie et al., 2020<br>(Wuhan, China)   | >18<br><br>Median 65<br>IQR 56-73     | 733  | R | (HR) <ul style="list-style-type: none"> <li>○ Age continuous 1.015, 1.02-1.03</li> <li>○ Male 1.23, 1.03-1.59</li> <li>○ Hypertension 1.38, 1.13-1.68</li> <li>○ Malignancy 1.91, 1.17-3.12</li> <li>○ Smoking 1.55, 1.08-2.23</li> </ul> |                                                                                                                                                                                                        |                                                          |
| Xie,Y et al., 2020<br>(Wuhan, China) | Median 66<br>IQR 53-73                | 62   | R |                                                                                                                                                                                                                                           | <ul style="list-style-type: none"> <li>○ Cardiovascular Disease 3.34, 1.12-9.94</li> <li>○ Male 2.03, .72-5.73</li> <li>○ Diabetes 8.33, 1.99-34.87</li> <li>○ Hypertension 5.37 1.76-16.37</li> </ul> |                                                          |
| Xiong et al., 2020                   | (31-92)                               | 131  | R |                                                                                                                                                                                                                                           | <ul style="list-style-type: none"> <li>○ Age continuous</li> <li>○ Mild mean 63.1</li> </ul>                                                                                                           |                                                          |

|                                                |                                |     |   |                                                                                                                                                                                                                                   |                                                                                                                                                                                                                                                                                                                                                                                                        |                                                                                                                                                                        |
|------------------------------------------------|--------------------------------|-----|---|-----------------------------------------------------------------------------------------------------------------------------------------------------------------------------------------------------------------------------------|--------------------------------------------------------------------------------------------------------------------------------------------------------------------------------------------------------------------------------------------------------------------------------------------------------------------------------------------------------------------------------------------------------|------------------------------------------------------------------------------------------------------------------------------------------------------------------------|
| (Wuhan, China)                                 | Mean<br>63.2<br>Sd 13.1        |     |   |                                                                                                                                                                                                                                   | <ul style="list-style-type: none"> <li>○ Severe mean 64.3</li> <li>○ BMI continuous</li> <li>○ Mild mean 23.6</li> <li>○ Severe mean 22.6</li> <li>○ Male .61, .21-1.76</li> <li>○ Smoker .66, .26-1.69</li> <li>○ Cardiovascular Disease 2.77, .98-7.86</li> <li>○ Diabetes .61, .21-1.76</li> <li>○ Chronic Obstructive Pulmonary Disease .84, .09-7.78</li> <li>○ Cancer 3.45, .21-56.85</li> </ul> |                                                                                                                                                                        |
| Xiong, S et al., 2020<br>(Wuhan, China)        | Median<br>58.5<br>IQR<br>47-69 | 116 | R |                                                                                                                                                                                                                                   | <ul style="list-style-type: none"> <li>○ Age &lt;65 vs ≥ 65 3.48, 1.57-7.73</li> <li>○ Male 1.01, .46-2.22</li> <li>○ Hypertension 1.98, .93-4.23</li> <li>○ Diabetes 1.66, .61-4.48</li> <li>○ Coronary Heart Disease 4.41, 1.34-14.49</li> <li>○ Chronic Liver Disease 1.11, .07-18.2</li> </ul>                                                                                                     |                                                                                                                                                                        |
| Xu B. et al., 2020<br>(Wuhan, China)           | Median<br>62<br>IQR<br>48.5-71 | 187 | R | <ul style="list-style-type: none"> <li>○ Age continuous</li> <li>○ Nonsurvivors median 73</li> <li>○ Male 1.31, .58-2.98</li> <li>○ Chronic Kidney Disease 2.98, .52-17.11</li> <li>○ Metabolic Disease 1.39, .43-4.49</li> </ul> | <ul style="list-style-type: none"> <li>○ Age continuous</li> <li>○ Mild median 56</li> <li>○ Severe median 60</li> <li>○ Male 1.55, .64-3.73</li> <li>○ Metabolic Disease 1.6, .5-5.11</li> </ul>                                                                                                                                                                                                      | <ul style="list-style-type: none"> <li>○ Age continuous</li> <li>○ ICU median 70</li> <li>○ Male 2.2, 1.16-4.17</li> <li>○ Metabolic Disease 1.11, .44-2.77</li> </ul> |
| Xu Jingyuan. et al.,<br>2020<br>(Wuhan, China) | Median<br>65<br>IQR<br>56-73   | 671 | R | <ul style="list-style-type: none"> <li>○ Age continuous</li> <li>○ Survivors median 61</li> <li>○ Nonsurvivors median 68</li> <li>○ Male 2.37, 1.36-4.12</li> </ul>                                                               |                                                                                                                                                                                                                                                                                                                                                                                                        |                                                                                                                                                                        |

|                                          |                                               |     |   |                                                                                                                                                                                                                                                                                                                                                                                                                                          |  |                                                                                                     |
|------------------------------------------|-----------------------------------------------|-----|---|------------------------------------------------------------------------------------------------------------------------------------------------------------------------------------------------------------------------------------------------------------------------------------------------------------------------------------------------------------------------------------------------------------------------------------------|--|-----------------------------------------------------------------------------------------------------|
|                                          |                                               |     |   | <ul style="list-style-type: none"> <li>○ Hypertension 2.20, 1.16-3.54</li> <li>○ Coronary Heart Disease .35, .18-.68</li> <li>○ Tumor .38, .09-1.55</li> <li>○ Stroke 1.32, .35-4.95</li> <li>○ Diabetes 1.05, .55-1.98</li> </ul><br>(HR) <ul style="list-style-type: none"> <li>○ Acute Kidney Injury 1.62, 1.15-2.3</li> </ul>                                                                                                        |  |                                                                                                     |
| Xu Jiqian et al., 2020<br>(Wuhan, China) | Mean 62.5<br>Sd 13.3                          | 239 | R | <ul style="list-style-type: none"> <li>○ Age &lt;65 vs ≥ 65 2.61, 1.51-4.49</li> <li>○ Male 1.16, .68-1.97</li> <li>○ Hypertension .96, .57-1.67</li> <li>○ Diabetes .8, .41-1.58</li> <li>○ Malignancy 3.64, .79-16.81</li> <li>○ Chronic Cardiac Disease .93, .45-1.93</li> <li>○ Chronic Pulmonary Disease 1.93, .51-7.34</li> <li>○ Cerebrovascular Disease 1.43, .43-4.8</li> <li>○ Chronic Liver Disease 1.18, .45-3.07</li> </ul> |  | <ul style="list-style-type: none"> <li>○ Age continuous</li> <li>○ ICU mean 62.5 sd 13.3</li> </ul> |
| Xu Peng et al., 2020<br>(China)          | (2 months-86 yrs)<br><br>Mean 46.1<br>Sd 15.2 | 703 | R | <ul style="list-style-type: none"> <li>○ Male 2.37, 1.08-5.17</li> <li>○ Cardiovascular Disease 18.26, 7.9-42.18</li> <li>○ Diabetes 7.11, 3.3-15.31</li> <li>○ Hypertension 6.4, 3.12-13.11</li> <li>○ Chronic Liver Disease .73, .1-5.55</li> </ul>                                                                                                                                                                                    |  |                                                                                                     |



|                                     |                                   |     |   |                                                                                                                                                                                                                                                                                                                                                                                                 |  |                                                                                                                                                                                                                                                                                                                 |
|-------------------------------------|-----------------------------------|-----|---|-------------------------------------------------------------------------------------------------------------------------------------------------------------------------------------------------------------------------------------------------------------------------------------------------------------------------------------------------------------------------------------------------|--|-----------------------------------------------------------------------------------------------------------------------------------------------------------------------------------------------------------------------------------------------------------------------------------------------------------------|
|                                     |                                   |     |   | <ul style="list-style-type: none"> <li>○ Chronic Kidney Disease 10.88, 2.6-45.63</li> <li>○ Malignancy 2.54, .31-20.95</li> </ul><br>(HR) <ul style="list-style-type: none"> <li>○ Age <math>\leq 60</math> vs <math>&gt;60</math> <math>\leq 60</math> vs <math>&gt;60</math> 2.23, 1.12-4.43</li> </ul>                                                                                       |  |                                                                                                                                                                                                                                                                                                                 |
| Yan Chengxi et al., 2021 (China)    | Mean 57.03<br>Sd 17.2             | 310 | R |                                                                                                                                                                                                                                                                                                                                                                                                 |  | <ul style="list-style-type: none"> <li>○ Age <math>\leq 60</math> vs <math>&gt;60</math> 12.72, 2.42-24.61</li> <li>○ Cardiovascular Disease 6.23, 2.88-13.48</li> <li>○ Male .57, .28-1.13</li> <li>○ Chronic Obstructive Pulmonary Disease 12.79, 2.38-68.56</li> <li>○ Diabetes 15.79, 3.06-81.57</li> </ul> |
| Yan Q. et al., 2020 (Wuhan, China)  | >65<br><br>Median 71<br>IQR 68-77 | 882 | R | (HR) <ul style="list-style-type: none"> <li>○ Age continuous 1.01, .98-1.05</li> <li>○ Male 1.36, .83-2.24</li> <li>○ Cardiovascular Disease 1.51, .91-2.51</li> <li>○ Chronic Kidney Disease 1.09, .60-1.97</li> <li>○ Cerebrovascular Disease .70, .28-1.8</li> <li>○ Diabetes 1.17, .73-1.86</li> <li>○ Acute Kidney Injury 4.78, 2.97-7.70</li> <li>○ Malignancy 1.45, 1.01-2.44</li> </ul> |  |                                                                                                                                                                                                                                                                                                                 |
| Yang C. et al., 2021 (Wuhan, China) | Median 62<br>IQR 49-69            | 203 | R | <ul style="list-style-type: none"> <li>○ Age continuous 1.03, .99-1.06</li> <li>○ Male 1.68, .89-3.15</li> </ul>                                                                                                                                                                                                                                                                                |  |                                                                                                                                                                                                                                                                                                                 |

|                                        |                                       |     |   |                                                                                                                                                                                                                                                                                                                                  |                                                                                                                                                                                                                                                                                                                                                                         |                                                                                 |
|----------------------------------------|---------------------------------------|-----|---|----------------------------------------------------------------------------------------------------------------------------------------------------------------------------------------------------------------------------------------------------------------------------------------------------------------------------------|-------------------------------------------------------------------------------------------------------------------------------------------------------------------------------------------------------------------------------------------------------------------------------------------------------------------------------------------------------------------------|---------------------------------------------------------------------------------|
|                                        |                                       |     |   | <ul style="list-style-type: none"> <li>○ Smoking History 1.89, .74-4.87</li> <li>○ Chronic Obstructive Pulmonary Disease 5.5, .98-30.92</li> <li>○ Hypertension 3.8, 2.09-6.93</li> <li>○ Diabetes 1.65, .73-3.75</li> <li>○ Cardiovascular Disease 3.33, .86-12.86</li> <li>○ Cerebrovascular Disease 1.15, .38-3.47</li> </ul> |                                                                                                                                                                                                                                                                                                                                                                         |                                                                                 |
| Yang D. et al., 2020<br>(Wuhan, China) | (20-99)                               | 836 | R | <ul style="list-style-type: none"> <li>○ Age &lt;65 vs ≥ 65 3.26, 1.79-5.94</li> <li>○ Male 2.77, 1.54-5.0</li> </ul>                                                                                                                                                                                                            |                                                                                                                                                                                                                                                                                                                                                                         |                                                                                 |
| Yang G. et al., 2020<br>(China)        | Median 66<br>IQR 60-73                | 462 | R | <ul style="list-style-type: none"> <li>○ Hypertension 1.68, .67-4.21</li> </ul>                                                                                                                                                                                                                                                  | <ul style="list-style-type: none"> <li>○ Hypertension 1.44, .76-2.73</li> </ul>                                                                                                                                                                                                                                                                                         | <ul style="list-style-type: none"> <li>○ Hypertension 1.77, .86-3.62</li> </ul> |
| Yang K. et al., 2020<br>(Hubei, China) | (14-96)<br><br>Median 63<br>IQR 56-70 | 205 | R | <ul style="list-style-type: none"> <li>○ Age ≤ 60 vs &gt;60 .97, .48-1.96</li> <li>○ Male 3.86, 1.80-8.25</li> <li>○ Hypertension .74, .34-1.59</li> <li>○ Diabetes .41, .34-1.59</li> <li>○ Coronary Heart Disease 2, .65-6.12</li> </ul>                                                                                       |                                                                                                                                                                                                                                                                                                                                                                         |                                                                                 |
| Yang Q. et al., 2020<br>(Wuhan, China) | (24-85)<br><br>Median 56<br>IQR 44-64 | 136 | R |                                                                                                                                                                                                                                                                                                                                  | <ul style="list-style-type: none"> <li>○ Age continuous <ul style="list-style-type: none"> <li>○ Mild median 53.5</li> <li>○ Severe median 64</li> </ul> </li> <li>○ Male 1.38, .63-3.02</li> <li>○ Hypertension 4.7, 2.02-10.94</li> <li>○ Cardiovascular Disease 7.41, 1.74-31.57</li> <li>○ Diabetes 4.04, 1.51-10.86</li> <li>○ Malignancy 1.04, .1-1.17</li> </ul> |                                                                                 |

|                                        |                                    |       |   |                                                                                                                                                                                                                                                                                                                                                                                            |                                                                                                                                                         |  |
|----------------------------------------|------------------------------------|-------|---|--------------------------------------------------------------------------------------------------------------------------------------------------------------------------------------------------------------------------------------------------------------------------------------------------------------------------------------------------------------------------------------------|---------------------------------------------------------------------------------------------------------------------------------------------------------|--|
|                                        |                                    |       |   |                                                                                                                                                                                                                                                                                                                                                                                            | <ul style="list-style-type: none"> <li>○ Chronic Kidney Disease .05, .01-.17</li> <li>○ Chronic Liver Disease 1.04, .2-5.43</li> </ul>                  |  |
| Yang X. et al., 2020<br>(Wuhan, China) | Median 57<br>IQR 47-67             |       |   | <ul style="list-style-type: none"> <li>○ Age continuous</li> <li>○ Median survivors 56</li> <li>○ Median nonsurvivors 67</li> <li>○ Male 1.9, 1.42- 2.53</li> </ul> (Rate Ratio) <ul style="list-style-type: none"> <li>○ Age 1.03, 1.02-1.04</li> </ul>                                                                                                                                   |                                                                                                                                                         |  |
| Yarza et al., 2020                     | Mean 66<br>IQR 63-68               | 63    | P | <ul style="list-style-type: none"> <li>○ Age &gt;65 vs ≤ 65 1.59, .5-4.99</li> <li>○ Male 1.17, .37-3.57</li> <li>○ Current Smoker 2.48, .5-12.54</li> <li>○ Hypertension 2, .68-5.88</li> <li>○ Diabetes 1.18, .34-3.9</li> <li>○ Chronic Kidney Disease 2.39, .29-19.85</li> <li>○ Chronic Obstructive Pulmonary Disease .35, .05-2.23</li> <li>○ Lung Cancer, 2.35, .58-9.51</li> </ul> |                                                                                                                                                         |  |
| Yayla et al., 2020<br>(Turkey)         | (0-17)<br><br>Median 8<br>IQR 2-13 | 77    | R | ○                                                                                                                                                                                                                                                                                                                                                                                          | <ul style="list-style-type: none"> <li>○ Age continuous</li> <li>○ Mild median 6.5</li> <li>○ Severe median 1</li> <li>○ Male 1.15, .1-13.25</li> </ul> |  |
| Yehia et al., 2020<br>(United States)  | Median 61<br>IQR 46-74)            | 11210 | R | (HR) <ul style="list-style-type: none"> <li>○ Age 18-49 1 (reference)</li> <li>○ 50-64. 1.36, 1.11-1.67</li> </ul>                                                                                                                                                                                                                                                                         | ○                                                                                                                                                       |  |

|                                                |                                      |      |   |                                                                                                                                                                                                                                                                                                                                                                                                                                                      |                                                                                                                                                                                                            |                                                                                                                                                                                                                                                             |
|------------------------------------------------|--------------------------------------|------|---|------------------------------------------------------------------------------------------------------------------------------------------------------------------------------------------------------------------------------------------------------------------------------------------------------------------------------------------------------------------------------------------------------------------------------------------------------|------------------------------------------------------------------------------------------------------------------------------------------------------------------------------------------------------------|-------------------------------------------------------------------------------------------------------------------------------------------------------------------------------------------------------------------------------------------------------------|
|                                                |                                      |      |   | <ul style="list-style-type: none"> <li>○ 65-84, 2.38, 1.73-3.26</li> <li>○ ≥ 85 3.96, 2.82-5.55</li> <li>○ Male 1.23, 1.11-1.36</li> <li>○ Asthma .91, .74-1.12</li> <li>○ Cancer 1.15, .91-1.47</li> <li>○ Chronic Kidney Disease 1.15, 1.03-1.30</li> <li>○ Chronic Obstructive Pulmonary Disease 1.22, .94-1.57</li> <li>○ Congestive Heart Failure 1.05, .91-1.22</li> <li>○ Diabetes 1.08, .85-1.36</li> <li>○ Obesity .97, .81-1.16</li> </ul> |                                                                                                                                                                                                            |                                                                                                                                                                                                                                                             |
| Yu Caizheng et al., (2020)<br>(Wuhan, China)   | Median 64<br>IQR 51-71               | 1663 | R | <ul style="list-style-type: none"> <li>○ Age &lt;65 vs ≥65. 2.11, 1.39-3.21</li> <li>○ Male 2.02 1.37-2.99</li> <li>○ Diabetes 2.52, 1.62-3.94</li> </ul>                                                                                                                                                                                                                                                                                            |                                                                                                                                                                                                            |                                                                                                                                                                                                                                                             |
| Yu Y. et al., 2020<br>(Wuhan, China)           | (8-97)<br><br>Median 58<br>IQR 46-67 | 3265 | R |                                                                                                                                                                                                                                                                                                                                                                                                                                                      | <ul style="list-style-type: none"> <li>○ Age continuous 1.03, 1.02-1.05</li> <li>○ Diabetes 1.95, .71-5.36</li> <li>○ Coronary Heart Disease .91, .24-3.37</li> <li>○ Hypertension .7, .13-3.86</li> </ul> |                                                                                                                                                                                                                                                             |
| Yue et al., 2021<br>(Hubei, China)             | (18-90)<br><br>Mean 47<br>Sd 15      | 180  | R |                                                                                                                                                                                                                                                                                                                                                                                                                                                      |                                                                                                                                                                                                            | <ul style="list-style-type: none"> <li>○ Age continuous 1.05, 1.02-1.09</li> <li>○ Male 1.08, .43-2.73</li> <li>○ Diabetes 5, 1.51-16.56</li> <li>○ Cardiovascular Disease 8.5, 3.25-22.97</li> <li>○ Chronic Kidney Disease 52.67, 10.05-276.14</li> </ul> |
| Zachariah et al., 2020<br>(NYC, United States) | <21                                  | 50   | R |                                                                                                                                                                                                                                                                                                                                                                                                                                                      | <ul style="list-style-type: none"> <li>○ Age continuous</li> <li>○ Severe median 14y</li> </ul>                                                                                                            |                                                                                                                                                                                                                                                             |

|                                                  |                          |       |   |                                                                                                                                                                                                                              |                                                                                                                                                                                                                                                                                                                                                                              |                                                                                                                                                                                                                                                       |
|--------------------------------------------------|--------------------------|-------|---|------------------------------------------------------------------------------------------------------------------------------------------------------------------------------------------------------------------------------|------------------------------------------------------------------------------------------------------------------------------------------------------------------------------------------------------------------------------------------------------------------------------------------------------------------------------------------------------------------------------|-------------------------------------------------------------------------------------------------------------------------------------------------------------------------------------------------------------------------------------------------------|
|                                                  |                          |       |   |                                                                                                                                                                                                                              | <ul style="list-style-type: none"> <li>○ Nonsevere median 9y</li> <li>○ Male .63, .15-2.68</li> <li>○ White 1.08, .25-4.61</li> <li>○ Hispanic .76, .18-3.25</li> <li>○ Obesity 14.4, 2.71-76.65</li> <li>○ Asthma 2.64, .4-17.32</li> <li>○ Immunosuppression .61, .07-5.66</li> <li>○ Sickle Cell Disease 1.58, .15-17.25</li> <li>○ Diabetes 11.43, .91-143.64</li> </ul> |                                                                                                                                                                                                                                                       |
| Ziener et al., 2020<br>(Michigan, United States) | n/a                      | 49701 | R | (RR) <ul style="list-style-type: none"> <li>○ White 1 (Reference)</li> <li>○ Black 5.5, 5.4-5.6</li> <li>○ Latino 3.1, 3.-3.2</li> <li>○ Asian/Pacific Islander 1.7, 1.6-1.8</li> <li>○ Native American 1, .8-1.2</li> </ul> |                                                                                                                                                                                                                                                                                                                                                                              |                                                                                                                                                                                                                                                       |
| Zeng H. et al., 2020<br>(Wuhan, China)           | Median 63.5<br>IQR 52-70 | 642   | R | <ul style="list-style-type: none"> <li>○ Age continuous</li> <li>○ Median survivors 60</li> <li>○ Median nonsurvivors 70</li> <li>○ Age &lt;65 vs ≥65 2.62, 1.57-4.38</li> <li>○ Male 2.08, 1.26-3.44</li> </ul>             | ○                                                                                                                                                                                                                                                                                                                                                                            |                                                                                                                                                                                                                                                       |
| Zeng Z. et al., 2020<br>(Hunan, China)           | Median 45<br>IQR 34.5-57 | 461   | R |                                                                                                                                                                                                                              |                                                                                                                                                                                                                                                                                                                                                                              | (HR) <ul style="list-style-type: none"> <li>○ Age &lt;65 vs ≥65 4.02, 2.32-6.95</li> <li>○ Male .68, 1.39-1.18</li> <li>○ Hypertension 2.65, 1.52-4.64</li> <li>○ Diabetes 1.55, .73-3.29</li> <li>○ Cardiovascular Disease 2.30, .99-5.38</li> </ul> |
| Zhang Hongmei et al., 2020<br>(Wuhan, China)     | (22-89)<br><br>Median 55 | 88    | R |                                                                                                                                                                                                                              | <ul style="list-style-type: none"> <li>○ Age continuous</li> <li>○ Moderate median 37</li> <li>○ Severe median 58</li> <li>○ Male 1.46, .54-3.96</li> </ul>                                                                                                                                                                                                                  | <ul style="list-style-type: none"> <li>○ Age continuous</li> <li>○ Critical Median 66</li> <li>○ Male 3.74, 1.31-10.72</li> <li>○ Hypertension 1.34, .47-3.84</li> </ul>                                                                              |

|                                              |                                                 |     |   |                                                                                                                                                                                                                                                      |                                                                                                                                                                                                                                                                                                                                                                                                |                                                                                                                                                                                                                                                                     |
|----------------------------------------------|-------------------------------------------------|-----|---|------------------------------------------------------------------------------------------------------------------------------------------------------------------------------------------------------------------------------------------------------|------------------------------------------------------------------------------------------------------------------------------------------------------------------------------------------------------------------------------------------------------------------------------------------------------------------------------------------------------------------------------------------------|---------------------------------------------------------------------------------------------------------------------------------------------------------------------------------------------------------------------------------------------------------------------|
|                                              |                                                 |     |   |                                                                                                                                                                                                                                                      | <ul style="list-style-type: none"> <li>○ Hypertension 3.3, .96-11.31</li> <li>○ Diabetes 1.68, .26-10.69</li> <li>○ Cardiovascular Disease 2.55, .25-25.86</li> <li>○ Chronic Kidney Disease .8, .05-13.37</li> <li>○ Cancer .8, .05-13.37</li> </ul>                                                                                                                                          | <ul style="list-style-type: none"> <li>○ Diabetes 4.24, 1.15-15.59</li> <li>○ Cardiovascular Disease 3.21, .73-14.08</li> <li>○ Cerebrovascular Disease 13.47, 1.42-127.88</li> <li>○ Chronic Kidney Disease 3, .4-22.64</li> <li>Cancer 1.43, .12-16.58</li> </ul> |
| Zhang Hongyan et al., 2020<br>(Wuhan, China) | (36-98)<br><br>Median<br>66                     | 107 | R | (HR)<br><ul style="list-style-type: none"> <li>○ Age 1.05, 1.01-1.1</li> </ul>                                                                                                                                                                       | <ul style="list-style-type: none"> <li>○ Age continuous</li> <li>○ Mild median 64</li> <li>○ Severe median 69</li> <li>○ Male 2.37, 1.09-5.18</li> <li>○ Smoke 1.44, .35-5.89</li> <li>○ Cancer 1, .39-2.6</li> <li>○ Hypertension 1.66, .74-3.74</li> <li>○ Diabetes 4.01, 1.36-11.86</li> <li>○ Cardiovascular Disease 2.55, .75-8.73</li> <li>○ Autoimmune Disease .91, .12-6.69</li> </ul> |                                                                                                                                                                                                                                                                     |
| Zhang Jing et al., 2020<br>(Wuhan, China)    | Median<br>60<br>IQR<br>49-69                    | 901 | R |                                                                                                                                                                                                                                                      | <ul style="list-style-type: none"> <li>○ Age continuous</li> <li>○ Moderate median 54</li> <li>○ Severe median 64</li> <li>○ Male 1.22, .92-1.62</li> <li>○ Hypertension 1.97, 1.43-2.71</li> <li>○ Diabetes 1.39, .9-2.15</li> <li>○ Malignancy 1.46, .6-3.57</li> </ul>                                                                                                                      | <ul style="list-style-type: none"> <li>○ Age continuous</li> <li>○ ICU median 68</li> </ul>                                                                                                                                                                         |
| Zhang Lin et al., 2020<br>(Wuhan, China)     | (21-97)<br><br>Median<br>51.5<br>IQR<br>34-65.3 | 222 | R | <ul style="list-style-type: none"> <li>○ Age &lt;70 vs ≥70 12.81, 5.7-28.8</li> </ul><br>(HR) <ul style="list-style-type: none"> <li>○ Smoke 2.59, .81-8.29</li> <li>○ Male .97, .41-2.28</li> <li>○ Chronic Liver Disease 1.94, .62-6.05</li> </ul> | <ul style="list-style-type: none"> <li>○ Age &lt;70 vs ≥70 16.19, 3.28-79.8</li> <li>○</li> </ul>                                                                                                                                                                                                                                                                                              | <ul style="list-style-type: none"> <li>○ Age &lt;70 vs ≥70 3.58, 1.69-7.59</li> </ul>                                                                                                                                                                               |

|                                                |                              |     |   |                                                                                                                                                                                                                                                                                                                                                                                                                                                                                                                         |                                                                                                                                 |                                                                             |
|------------------------------------------------|------------------------------|-----|---|-------------------------------------------------------------------------------------------------------------------------------------------------------------------------------------------------------------------------------------------------------------------------------------------------------------------------------------------------------------------------------------------------------------------------------------------------------------------------------------------------------------------------|---------------------------------------------------------------------------------------------------------------------------------|-----------------------------------------------------------------------------|
|                                                |                              |     |   | <ul style="list-style-type: none"> <li>○ Chronic Kidney Disease .42, .06-3.18</li> <li>○ Chronic Obstructive Pulmonary Disease 2.31, .77-6.9</li> <li>○ Diabetes .76, .22-2.58</li> </ul>                                                                                                                                                                                                                                                                                                                               |                                                                                                                                 |                                                                             |
| Zhang L. et al., 2020<br>(Wuhan, China)        | Median<br>65<br>IQR<br>56-70 | 28  | R |                                                                                                                                                                                                                                                                                                                                                                                                                                                                                                                         | (HR)<br><ul style="list-style-type: none"> <li>○ Age continuous 1.46, .48-4.43</li> <li>Male .57, .16-2.04</li> </ul>           |                                                                             |
| Zhang Lijuan et al.,<br>2020<br>(Wuhan, China) | Median<br>56<br>IQR<br>39-68 | 651 | R | <ul style="list-style-type: none"> <li>○ Age continuous</li> <li>○ Survivors median 69</li> <li>○ Nonsurvivors median 84</li> <li>○ Male 3.6, .96-13.52</li> <li>○ Stroke 7.79, 4.17-14.56</li> <li>○ Hypertension 2.17, .38-12.46</li> <li>○ Diabetes 1.18, .37-3.73</li> <li>○ Cardiovascular Disease 1.64, .5-5.1</li> <li>○ Chronic Kidney Disease 2.05, .55-7.7</li> <li>○ Chronic Pulmonary Disease 2.68, .67-10.77</li> </ul><br>(HR)<br><ul style="list-style-type: none"> <li>○ Age 1.08, 1.01-1.15</li> </ul> | <ul style="list-style-type: none"> <li>○ Stroke 1.12, .41-3.09</li> </ul>                                                       | <ul style="list-style-type: none"> <li>○ Stroke 9.12, 4.88-17.04</li> </ul> |
| Zhang Nan et al., 2020<br>(Wuhan, China)       | Median<br>65<br>IQR<br>61-72 | 52  | R |                                                                                                                                                                                                                                                                                                                                                                                                                                                                                                                         | <ul style="list-style-type: none"> <li>○ Male 1.26, .4-4.03</li> <li>○ BMI continuous</li> <li>○ Severe median 24.34</li> </ul> |                                                                             |

|                                          |                            |     |   |                                                                                                                                                                                                                         |                                                                                                                                                                                                                                                                                                                                                 |  |
|------------------------------------------|----------------------------|-----|---|-------------------------------------------------------------------------------------------------------------------------------------------------------------------------------------------------------------------------|-------------------------------------------------------------------------------------------------------------------------------------------------------------------------------------------------------------------------------------------------------------------------------------------------------------------------------------------------|--|
|                                          |                            |     |   |                                                                                                                                                                                                                         | <ul style="list-style-type: none"> <li>○ Non-severe median 24.67</li> <li>○ Smoke .66, .19-2.3</li> <li>○ Chronic Kidney Disease 3.16, .27-37.27</li> </ul><br>(HR) <ul style="list-style-type: none"> <li>○ Age 1.02, .96-1.07</li> </ul>                                                                                                      |  |
| Xu Xunhua et al., 2020<br>(Wuhan, China) | Median 64.4<br><br>Sd 11.0 | 60  | R | <ul style="list-style-type: none"> <li>○ Age continuous</li> <li>○ Mean Survivors 62.6</li> <li>○ Mean Nonsurvivors 70.6</li> <li>○ Male .91, .21-4.01</li> </ul>                                                       |                                                                                                                                                                                                                                                                                                                                                 |  |
| Zhang Nannan et al., 2021<br>(China)     | Median 43.8<br>Sd 15.9     | 78  | P |                                                                                                                                                                                                                         | <ul style="list-style-type: none"> <li>○ Age continuous</li> <li>○ Moderate median 43.5 sd 16</li> <li>○ Severe median 48 sd 15.5</li> <li>○ Male 3, .33-27.06</li> <li>○ Hypertension 1.24, .13-11.75</li> <li>○ Diabetes 1.24, .13-11.75</li> <li>○ Smoke 1.87, .19-18.73</li> </ul>                                                          |  |
| Zhang Q. et al., 2020<br>(Wuhan, China)  | Median 62<br>IQR 58-81     | 74  | R |                                                                                                                                                                                                                         | <ul style="list-style-type: none"> <li>○ Age continuous</li> <li>○ Nonsevere median 61</li> <li>○ Severe median 72</li> <li>○ Male 3.22, 1.19-8.7</li> <li>○ BMI continuous</li> <li>○ Nonsevere median 24.7</li> <li>○ Severe median 24.5</li> <li>○ Hypertension 1.69, .65-4.38</li> <li>○ Coronary Heart Disease 3.54, 1.02-12.24</li> </ul> |  |
| Zhang S. et al., 2020<br>(Wuhan, China)  | Median 62<br>IQR 51-69     | 828 | R | <ul style="list-style-type: none"> <li>○ Age &gt;60 vs ≤60 4.63, 2.99-7.18</li> </ul><br>(HR) <ul style="list-style-type: none"> <li>○ Male 1.41, .93-2.15</li> <li>○ Comorbidity (yes vs no) 1.41, .93-2.15</li> </ul> |                                                                                                                                                                                                                                                                                                                                                 |  |
| Zhang W. et al., 2021<br>(Wuhan, China)  | Median 63<br>IQR           | 461 | R |                                                                                                                                                                                                                         | <ul style="list-style-type: none"> <li>○ Diabetes 2.04, 1.28-3.28</li> </ul>                                                                                                                                                                                                                                                                    |  |



|                                          |                                              |      |   |                                                                                                                                                                                                                                                                                                                                                                                    |                                                                                                                                                                                                                                                                                                                                                                                                                                          |                                                                                        |
|------------------------------------------|----------------------------------------------|------|---|------------------------------------------------------------------------------------------------------------------------------------------------------------------------------------------------------------------------------------------------------------------------------------------------------------------------------------------------------------------------------------|------------------------------------------------------------------------------------------------------------------------------------------------------------------------------------------------------------------------------------------------------------------------------------------------------------------------------------------------------------------------------------------------------------------------------------------|----------------------------------------------------------------------------------------|
|                                          | 54-69                                        |      |   |                                                                                                                                                                                                                                                                                                                                                                                    |                                                                                                                                                                                                                                                                                                                                                                                                                                          |                                                                                        |
| Zhang Y. et al., 2021<br>(Wuhan, China)  | >18<br><br>Mean<br>60<br>Sd 15               | 274  | R |                                                                                                                                                                                                                                                                                                                                                                                    | <ul style="list-style-type: none"> <li>○ Age 1.03, 1.01-1.05</li> <li>○ Male 2.61, .84-7.45</li> <li>○ Smoke 1.55, .70-3.45</li> <li>○ Chronic Pulmonary Disease 2.16, .68-6.93</li> <li>○ Cardiovascular Disease 1.13, .50-2.52</li> <li>○ Diabetes 1.74, .85-3.58</li> <li>○ Hypertension .86, .5-1.47</li> </ul>                                                                                                                      |                                                                                        |
| Zhao J. et al., 2021<br>(Jiangsu, China) | >18                                          | 583  | R |                                                                                                                                                                                                                                                                                                                                                                                    | <ul style="list-style-type: none"> <li>○ Age &lt;65 vs ≥ 65 2.75, 1.57-4.81</li> <li>○ Male 1.28, .8-2.04</li> <li>○ Smoke .9, .41-1.98</li> <li>○ Hypertension 2.18, 1.31-3.64</li> <li>○ Diabetes 4.26, 2.44-7.48</li> <li>○ Chronic Obstructive Pulmonary Disease 4.45, 1.64-12.03</li> <li>○ Coronary Heart Disease 3.12, 1.14-8.56</li> <li>○ Cardiovascular Disease 6.25, 1.77-22.09</li> <li>○ Cancer 9.52, 2.63-34.49</li> </ul> |                                                                                        |
| Zhao M., et al., 2020<br>(China)         | (21-101)<br><br>Median<br>61<br>IQR<br>46-70 | 1000 | R | <ul style="list-style-type: none"> <li>○ Age &lt;60 vs ≥ 60. 4.11, 2.58-6.56</li> </ul><br>(HR) <ul style="list-style-type: none"> <li>○ Hypertension 1.97, 1.3-3.0</li> <li>○ Diabetes .96, .58-1.61</li> <li>○ Coronary Heart Disease .97, .55-1.73</li> <li>○ Chronic Obstructive Pulmonary Disease 1.48, .63-3.48</li> <li>○ Cerebrovascular Disease 2.1, 1.16-3.81</li> </ul> | <ul style="list-style-type: none"> <li>○ Age &lt;60 vs ≥ 60 2.8, 2.08-3.79</li> </ul>                                                                                                                                                                                                                                                                                                                                                    | <ul style="list-style-type: none"> <li>○ Age &lt;60 vs ≥ 60 2.01, 1.17-3.47</li> </ul> |

|                                        |                           |     |   |                                                                                                                                                                                                                                                                                                                                                                                                 |  |                                                                                                                                                                                                                                                                                                                                                                                                                                                             |
|----------------------------------------|---------------------------|-----|---|-------------------------------------------------------------------------------------------------------------------------------------------------------------------------------------------------------------------------------------------------------------------------------------------------------------------------------------------------------------------------------------------------|--|-------------------------------------------------------------------------------------------------------------------------------------------------------------------------------------------------------------------------------------------------------------------------------------------------------------------------------------------------------------------------------------------------------------------------------------------------------------|
|                                        |                           |     |   | <ul style="list-style-type: none"> <li>○ Chronic Renal Disease 1.37, .63-2.94</li> <li>○ Chronic Liver Disease 1.22, .46-3.21</li> <li>○ Malignancy .74, .30-1.84</li> </ul>                                                                                                                                                                                                                    |  |                                                                                                                                                                                                                                                                                                                                                                                                                                                             |
| Zhao M. et al., 2020<br>(Wuhan, China) | Mean<br>60.3<br>Sd 12.7   | 413 | R |                                                                                                                                                                                                                                                                                                                                                                                                 |  | <ul style="list-style-type: none"> <li>○ Age continuous <ul style="list-style-type: none"> <li>○ ICU mean 64.6</li> <li>○ Non-ICU mean 59.5</li> </ul> </li> <li>○ Male 1.21, .71-2.04</li> <li>○ Diabetes 1.26, .58-2.74</li> <li>○ Hypertension 1.22, .69-2.16</li> <li>○ Cardiovascular Disease 1.38, .63-3.02</li> <li>○ Pulmonary Disease 2.46, .82-7.31</li> <li>○ Cancer 2.33, .98-5.58</li> <li>○ Chronic Renal Disease 4.33, 1.13-16.57</li> </ul> |
| Zhao Y. et al., 2020<br>(Wuhan, China) | Median<br>58<br>IQR 37-65 | 539 | R | <ul style="list-style-type: none"> <li>○ Age continuous .91, .88-.94</li> <li>○ Male 1.64, 1.1-2.46</li> <li>○ Diabetes 2.76, 1.59-4.9</li> <li>○ Chronic Kidney Disease 10.39, 2.07-52.13</li> <li>○ Hypertension 4.24, 2.76-6.51</li> <li>○ Coronary Heart Disease 4.45, 2.25-8.79</li> <li>○ Cerebrovascular Disease 13.98, 4.55-42.96</li> <li>○ Malignant Tumor 3.23, 1.39-7.52</li> </ul> |  |                                                                                                                                                                                                                                                                                                                                                                                                                                                             |

|                                           |                                       |      |   |                                                                                                                                                                                                                                 |                                                                                                                                                                                                                                                                                                                                  |                                                                                                                                                                 |
|-------------------------------------------|---------------------------------------|------|---|---------------------------------------------------------------------------------------------------------------------------------------------------------------------------------------------------------------------------------|----------------------------------------------------------------------------------------------------------------------------------------------------------------------------------------------------------------------------------------------------------------------------------------------------------------------------------|-----------------------------------------------------------------------------------------------------------------------------------------------------------------|
| Zheng B. et al., 2021<br>(Beijing, China) | (17-86)                               | 198  | R |                                                                                                                                                                                                                                 | <ul style="list-style-type: none"> <li>○ Age continuous <ul style="list-style-type: none"> <li>○ Mild mean 46</li> <li>○ Severe mean 64.5</li> </ul> </li> <li>○ Male .8, .38-1.69</li> <li>○ Hypertension 3.92, 1.45-10.62</li> <li>○ Diabetes 3.25, .87-12.18</li> </ul>                                                       |                                                                                                                                                                 |
| Zheng T. et al., 2020<br>(China)          | (18-65)<br><br>Median 50<br>IQR 40-57 | 1320 | R |                                                                                                                                                                                                                                 | <ul style="list-style-type: none"> <li>○ Age &lt;60 vs ≥ 60 1.11, .72-1.70</li> <li>○ Male 2.34, 1.64-3.35</li> </ul>                                                                                                                                                                                                            |                                                                                                                                                                 |
| Zhong Y. et al., 2020<br>(Wuhan, China)   | Mean 66.3<br>Sd 10.6                  | 650  | R | <ul style="list-style-type: none"> <li>○ Age &gt;70 vs ≤70. 1.83, .66-5.07</li> <li>○ Male 5.49, 1.78-16.94</li> <li>○ Coronary Artery Disease 2.03, .45-9.08</li> </ul>                                                        |                                                                                                                                                                                                                                                                                                                                  |                                                                                                                                                                 |
| Zhou Jun et al., 2021<br>(Jiangsu, China) | Median 48                             | 283  | R |                                                                                                                                                                                                                                 | <ul style="list-style-type: none"> <li>○ Age continuous <ul style="list-style-type: none"> <li>○ Mild median 45</li> <li>○ Severe/Critical median 61</li> </ul> </li> <li>○ Male 2.39, .74-7.77</li> <li>○ Diabetes 4.81, 1.03-14.21</li> <li>○ Cerebrovascular Disease 9.85, 2.1-46.7</li> <li>○ Cancer .83, .1-6.73</li> </ul> |                                                                                                                                                                 |
| Zhou J. et al., 2020<br>(Hubei, China)    | (19-92)<br><br>Mean 58.3<br>Sd 15.9   | 429  | R |                                                                                                                                                                                                                                 |                                                                                                                                                                                                                                                                                                                                  | <ul style="list-style-type: none"> <li>○ Age &lt;61 vs ≥61. 4.45, 1.68-11.75</li> <li>○ Male 2.99, 1.27-6.99</li> <li>○ Hypertension 2.65, 1.16-6.04</li> </ul> |
| Zhou S. et al., 2020<br>(Hubei, China)    | Median 59.5<br>IQR 47-69              | 220  | R | <ul style="list-style-type: none"> <li>○ Age continuous 1.09, 1.03-1.15</li> <li>○ Male 3.15, 1.62-6.12</li> <li>○ Smoke 3.76, 1.47-9.63</li> <li>○ Hypertension 2.96, 1.56-5.61</li> <li>○ Diabetes 3.18, 1.48-6.84</li> </ul> |                                                                                                                                                                                                                                                                                                                                  |                                                                                                                                                                 |

|                                         |                          |     |   |                                                                                                                                                                                                                                                                                                                                                                                                                                                                                                                         |                                                                                                                                                                                                                                                       |  |
|-----------------------------------------|--------------------------|-----|---|-------------------------------------------------------------------------------------------------------------------------------------------------------------------------------------------------------------------------------------------------------------------------------------------------------------------------------------------------------------------------------------------------------------------------------------------------------------------------------------------------------------------------|-------------------------------------------------------------------------------------------------------------------------------------------------------------------------------------------------------------------------------------------------------|--|
|                                         |                          |     |   | <ul style="list-style-type: none"> <li>○ Cardiovascular Disease 3.58, 1.52-8.44</li> <li>○ Cerebrovascular Disease 10.83, 2.11-55.44</li> <li>○ Chronic Obstructive Pulmonary Disease 10.22, 1.04-100.51</li> <li>○ Chronic Renal Failure 10.22, 1.04-100.51</li> </ul>                                                                                                                                                                                                                                                 |                                                                                                                                                                                                                                                       |  |
| Zhou Wei et al., 2021<br>(Wuhan, China) | Median 68<br>IQR 62-74   | 186 | R | <ul style="list-style-type: none"> <li>○ Age continuous <ul style="list-style-type: none"> <li>○ Survivor median 67</li> <li>○ Nonsurvivor median 68</li> </ul> </li> <li>○ Male 2.19, 1.21-3.95</li> <li>○ Hypertension 2.36, 1.17-4.78</li> <li>○ Smoke 2.15, .77-5.99</li> <li>○ Diabetes 1.21, .6-2.47</li> <li>○ Chronic Obstructive Pulmonary Disease 1.35, .29-6.2</li> <li>○ Coronary Heart Disease 1.85, .85-4.04</li> <li>○ Chronic Renal Disease .66, .11-4.04</li> <li>○ Malignancy .82, .24-2.8</li> </ul> |                                                                                                                                                                                                                                                       |  |
| Zhou Yiwu et al., 2020                  | Median 43<br>IQR 31.8-51 | 366 | R |                                                                                                                                                                                                                                                                                                                                                                                                                                                                                                                         | <ul style="list-style-type: none"> <li>○ Age &lt;65 vs ≥ 65 2.41, 1.02-5.69</li> <li>○ Male 1.2, .63-2.3</li> <li>○ Diabetes 1.73, .28-8.62</li> <li>○ Hypertension 6.75, 2.03-23.2</li> <li>○ Cardiovascular Disease 123.63, 7.99-7441.61</li> </ul> |  |

|                                       |                                          |       |   |                                                                                                                                                                                                                                                                                                                                                                                   |                                                                                                                                                                                                                                                                                                                             |                                                                                                                                                                                                                                                                                                                                                                                      |
|---------------------------------------|------------------------------------------|-------|---|-----------------------------------------------------------------------------------------------------------------------------------------------------------------------------------------------------------------------------------------------------------------------------------------------------------------------------------------------------------------------------------|-----------------------------------------------------------------------------------------------------------------------------------------------------------------------------------------------------------------------------------------------------------------------------------------------------------------------------|--------------------------------------------------------------------------------------------------------------------------------------------------------------------------------------------------------------------------------------------------------------------------------------------------------------------------------------------------------------------------------------|
|                                       |                                          |       |   |                                                                                                                                                                                                                                                                                                                                                                                   | <ul style="list-style-type: none"> <li>○ Chronic Liver Disease 16.72, 1.22-258.17</li> <li>○ Chronic Kidney Disease 39.49, 1.88-1107.01</li> </ul>                                                                                                                                                                          |                                                                                                                                                                                                                                                                                                                                                                                      |
| He Y. et al., 2020<br>(China)         | Median<br>65                             | 10871 | R |                                                                                                                                                                                                                                                                                                                                                                                   |                                                                                                                                                                                                                                                                                                                             | <ul style="list-style-type: none"> <li>○ Age &lt;65 vs ≥ 65 5.21, 2.81-9.8</li> <li>○ Male 1.73, .95-3.21</li> <li>○ Smoke .37, .19-.76</li> <li>○ Chronic Kidney Disease 7.69, 1.72-32.26</li> <li>○ Stroke 7.18, .51-7.69</li> <li>○ Cardiovascular Disease 1.59, .66-3.64</li> <li>○ Chronic Liver Disease .96, .26-2.77</li> <li>○ Autoimmune Disease 3.10, .65-13.33</li> </ul> |
| Zhu B. et al., 2020<br>(China)        | Median<br>47<br>IQR 37-55.5              | 345   | R |                                                                                                                                                                                                                                                                                                                                                                                   | <ul style="list-style-type: none"> <li>○ Age continuous <ul style="list-style-type: none"> <li>○ Mild median 44</li> <li>○ Severe median 54</li> </ul> </li> <li>○ Male 1.41, .83-2.4</li> <li>○ BMI continuous <ul style="list-style-type: none"> <li>○ Mild mean 23.4</li> <li>○ Severe mean 25.11</li> </ul> </li> </ul> |                                                                                                                                                                                                                                                                                                                                                                                      |
| Zhu Y. et al., 2021<br>(Wuhan, China) | (29-93)<br><br>Median<br>66<br>IQR 58-77 | 167   | R | <ul style="list-style-type: none"> <li>○ Age continuous 1.04, 1.02-1.06</li> <li>○ Male .94, .6-1.47</li> <li>○ Diabetes .93, .58-1.49</li> <li>○ Hypertension 1.41, .92-2.16</li> <li>○ Coronary Heart Disease 1.51, .96-2.40</li> <li>○ Chronic Lung Disease .82, .36-1.87</li> <li>○ Chronic Renal Failure 1.42, .77-2.61</li> <li>○ Malignant Tumor 1.51, .66-3.46</li> </ul> |                                                                                                                                                                                                                                                                                                                             |                                                                                                                                                                                                                                                                                                                                                                                      |

|                                        |                                     |     |   |                                                                                                                                                                                                                                                                                                                                                                                             |  |                                                                                                                                                                                                                                                                                                                                                                                                                                                                                                                             |
|----------------------------------------|-------------------------------------|-----|---|---------------------------------------------------------------------------------------------------------------------------------------------------------------------------------------------------------------------------------------------------------------------------------------------------------------------------------------------------------------------------------------------|--|-----------------------------------------------------------------------------------------------------------------------------------------------------------------------------------------------------------------------------------------------------------------------------------------------------------------------------------------------------------------------------------------------------------------------------------------------------------------------------------------------------------------------------|
|                                        |                                     |     |   | ○ Cerebrovascular Disease 1.10, .67-1.79                                                                                                                                                                                                                                                                                                                                                    |  |                                                                                                                                                                                                                                                                                                                                                                                                                                                                                                                             |
| Zieleskiewicz et al., 2020<br>(France) | Median 61<br>IQR 54–77              | 100 | R |                                                                                                                                                                                                                                                                                                                                                                                             |  | <ul style="list-style-type: none"> <li>○ Age continuous <ul style="list-style-type: none"> <li>○ ICU median 69</li> <li>○ Non-ICU median 60</li> </ul> </li> <li>○ Male 4.74, 1.3-17.31</li> <li>○ BMI &gt;30 vs ≤30 2.12, .69-6.55</li> <li>○ Hypertension 5.91, 2.12-16.45</li> <li>○ Coronary Disease 5.08, 1.39-18.63</li> <li>○ Chronic Obstructive Pulmonary Disease .82, .16-4.17</li> <li>○ Chronic Kidney Disease 3.45, .21-57.5</li> <li>○ Diabetes 6.43, 2.05-20.15</li> <li>○ Cancer 2.74, .57-13.24</li> </ul> |
| Zou X. et al., 2020<br>(Wuhan, China)  | Mean 60.7<br>Sd 13                  | 154 | R | <ul style="list-style-type: none"> <li>○ Age &lt;60 vs ≥ 60 6.44, 2.76- 15.03</li> <li>○ Male .73, .37-1.45</li> <li>○ Smoking 1.77, .56-5.57</li> <li>○ Hypertension 1.98, .97-4.03</li> <li>○ Diabetes 1.44, .69-3.04</li> <li>○ Coronary Heart Disease 10.27, 3.54-29.79</li> <li>○ Chronic Obstructive Pulmonary Disease 4.3, 1.03-17.97</li> <li>○ Malignancy .48, .05-4.41</li> </ul> |  |                                                                                                                                                                                                                                                                                                                                                                                                                                                                                                                             |
| Zuniga et al., 2021<br>(Spain)         | (19-96)<br><br>Mean 64.9<br>Sd 14.1 | 318 | P | <ul style="list-style-type: none"> <li>○ Age <ul style="list-style-type: none"> <li>○ Survivor mean 63.3</li> </ul> </li> </ul>                                                                                                                                                                                                                                                             |  |                                                                                                                                                                                                                                                                                                                                                                                                                                                                                                                             |

|                                       |                                         |     |   |                                                                                                                                                                                                                                                                                                                                                                                                                                                                                                                                                                                                |  |                                                                                                                                                                                                                                                                                           |
|---------------------------------------|-----------------------------------------|-----|---|------------------------------------------------------------------------------------------------------------------------------------------------------------------------------------------------------------------------------------------------------------------------------------------------------------------------------------------------------------------------------------------------------------------------------------------------------------------------------------------------------------------------------------------------------------------------------------------------|--|-------------------------------------------------------------------------------------------------------------------------------------------------------------------------------------------------------------------------------------------------------------------------------------------|
|                                       |                                         |     |   | <ul style="list-style-type: none"> <li>○ Nonsurvivor mean 73.9</li> </ul><br>(HR) <ul style="list-style-type: none"> <li>○ Age continuous 1.05, 1.02-1.09</li> <li>○ Male .43, .17- 1.05</li> <li>○ Obesity 1.24, .39- 3.90</li> <li>○ Asthma 2.24, .55-9.02</li> <li>○ Chronic Obstructive Pulmonary Disease 1.73, .55-5.44</li> <li>○ Hypertension .56, .19- 1.64</li> <li>○ Chronic Heart Disease 1.06, .31-3.59</li> <li>○ Atrial Fibrillation 1.67, .52-5.38</li> <li>○ Immunosuppression 1.74, .23-12.89</li> <li>○ Tumour 2.45, .88-6.79</li> <li>○ Diabetes 1.22, .50- 2.96</li> </ul> |  |                                                                                                                                                                                                                                                                                           |
| Zuo P. et al., 2020<br>(Wuhan, China) | (65-95)<br><br>Mean<br>72.95<br>Sd 6.39 | 446 | R | <ul style="list-style-type: none"> <li>○ Male .98, .96–1.0</li> <li>○ Age &gt;70 vs ≤70 .98, .97–.99</li> <li>○ Hypertension .98, .97–.99</li> <li>○ Diabetes .98, .96–1.0</li> </ul>                                                                                                                                                                                                                                                                                                                                                                                                          |  | <ul style="list-style-type: none"> <li>○ Male .97, .96–.99</li> <li>○ Age &gt;70 vs ≤70 .97, .96–.99</li> <li>○ Hypertension .92, .86–.99</li> <li>○ Diabetes .94, .90–.99</li> </ul>                                                                                                     |
|                                       |                                         |     |   |                                                                                                                                                                                                                                                                                                                                                                                                                                                                                                                                                                                                |  |                                                                                                                                                                                                                                                                                           |
| Thompson et al., 2020<br>(London)     | Median<br>62<br>IQR ( 54-70)            | 156 | P |                                                                                                                                                                                                                                                                                                                                                                                                                                                                                                                                                                                                |  | <ul style="list-style-type: none"> <li>○ Age continuous 1.13, 1.07-1.21</li> <li>○ Male 1.27, .54-3.17</li> <li>○ Black 2.11, .59-7.6</li> <li>○ Asian 2.94, .94-9.78</li> <li>○ Other .41, .02-3.18</li> <li>○ Overweight/Obese 3.06, 1.1-8.74</li> <li>○ Smoke .67, .40-1.08</li> </ul> |

|                                            |                                               |     |   |                                                                                                                                                                                                                                                                                                                                                                   |                                                                                                                                                                                                                                                                                                                                            |                                                                                   |
|--------------------------------------------|-----------------------------------------------|-----|---|-------------------------------------------------------------------------------------------------------------------------------------------------------------------------------------------------------------------------------------------------------------------------------------------------------------------------------------------------------------------|--------------------------------------------------------------------------------------------------------------------------------------------------------------------------------------------------------------------------------------------------------------------------------------------------------------------------------------------|-----------------------------------------------------------------------------------|
|                                            |                                               |     |   |                                                                                                                                                                                                                                                                                                                                                                   |                                                                                                                                                                                                                                                                                                                                            | ○ Any Comorbidity 1.29, .46-4.21                                                  |
| Tian et al., 2020<br>(Wuhan, China)        | ≥ 18<br><br>Median<br>64<br>IQR<br>(57-69)    | 751 | R | ○ Cancer 2.04, 1.34-3.13                                                                                                                                                                                                                                                                                                                                          | ○ Cancer 3.75, 2.71-5.19<br>○ Age continuous 1.04, .85-2.51<br>○ Male 1.46, .85-2.51<br>○ Hypertension 1.7, .97-2.97<br>○ Diabetes .81, .43-1.51<br>○ Coronary Heart Disease 2.05, .73-5.77<br>○ Chronic Kidney Disease 1.14, .2-6.35<br>○ Cardiovascular Disease 1.14, .28-4.68<br>○ Chronic Obstructive Pulmonary Disease 1.14, .1-12.73 |                                                                                   |
| Tobolowsky et al., 2021<br>(United States) | (51-100)<br><br>Median<br>83                  | 130 | R | Rate Ratio<br>○ Age 51-70 (reference)<br>71-80 1.38, .6-4.9<br>81-90 1.8, .7-4.7<br>91-100 2.3, .9-6<br>○ Female 1.1, .6-1.9<br>○ Hypertension .9, .5-1.6<br>○ Renal Disease 1.7, 1-2.8<br>○ Pulmonary Disease 1.1, .6-1.9<br>○ Diabetes 1, .6-1.7<br>○ Malignancy 1.4, .8-2.4<br>○ Obesity 1, .6-1.7<br>○ Neurologic Disease 1, .6-1.7<br>○ Dementia 1.6, .9-2.6 |                                                                                                                                                                                                                                                                                                                                            |                                                                                   |
| Toh et al., 2021<br>(Australia)            | (19-85)<br><br>Median<br>60<br>IQR<br>(51-69) | 103 | R | ○ Age continuous<br>○ Median nonsurvivors 74.5<br>○ Median survivors 60                                                                                                                                                                                                                                                                                           |                                                                                                                                                                                                                                                                                                                                            | ○ Age continuous<br>○ ICU median 66.5<br>○ Non-ICU median 60<br><br>Relative Risk |



|                               |                          |     |   |                                                                                                                                                                                                                                                                                                                                                           |                                                                                                                                                                 |                                                                                                                                                                                          |
|-------------------------------|--------------------------|-----|---|-----------------------------------------------------------------------------------------------------------------------------------------------------------------------------------------------------------------------------------------------------------------------------------------------------------------------------------------------------------|-----------------------------------------------------------------------------------------------------------------------------------------------------------------|------------------------------------------------------------------------------------------------------------------------------------------------------------------------------------------|
|                               |                          |     |   | Relative Risk<br>○ Male 2.6 (p=.62)<br>○ Cardiovascular Disease 16.3 (p=.01)<br>○ Respiratory Disease 1.5 (p=.56)<br>○ Diabetes 19 (p=.01)                                                                                                                                                                                                                |                                                                                                                                                                 | ○ Male 3.1 (p=.04)<br>○ Hypertension 2.8 (p=.03)<br>○ Cardiovascular Disease 2.7 (p=.03)<br>○ Respiratory Disease 1.7 (p=.32)<br>○ Diabetes 3.2 (p=.02)<br>○ Immunosuppression .95 (p=1) |
| Tomasoni et al., 2020 (Italy) | Mean 67.4<br>Sd 13.2     | 692 | R | (HR)<br>○ Age (per 5 years) 1.28, 1.13-1.45<br>○ Male 2.14, 1.16-3.94<br>○ Smoker 1.44, 1.01-2.06<br>○ Heart Failure 2.25, 1.26-4.02<br>○ Diabetes 1.34, .95-1.89<br>○ Atrial Fibrillation 1.27, .67-2.14<br>○ Coronary Artery Disease 1.2, .67-2.14<br>○ Chronic Obstructive Pulmonary Disease 1.41, .72-2.75<br>○ Chronic Kidney Disease 1.09, .56-2.10 |                                                                                                                                                                 |                                                                                                                                                                                          |
| Tong et al., 2020 (China)     | Median 50<br>IQR (42-57) | 39  | R |                                                                                                                                                                                                                                                                                                                                                           | ○ Age continuous<br>○ Mild median 49<br>○ Severe median 54<br>○ Male .7, .16-3.13<br>○ Current smoker 4, .48-33.58<br>○ Cardiovascular Disease 8.29, .65-104.89 |                                                                                                                                                                                          |

|                                                 |                                    |     |   |                                                                                                                                                                                                                                                                                                                  |  |                                                                                                                                                                                                                    |
|-------------------------------------------------|------------------------------------|-----|---|------------------------------------------------------------------------------------------------------------------------------------------------------------------------------------------------------------------------------------------------------------------------------------------------------------------|--|--------------------------------------------------------------------------------------------------------------------------------------------------------------------------------------------------------------------|
| Albalawi et al., 2021<br>(Saudi Arabia)         | Mean<br>54.2<br>Sd 15.7            | 119 | R | <ul style="list-style-type: none"> <li>○ Age <math>\geq 65</math> vs <math>&lt; 65</math> 5.2, 1.74-15.49</li> <li>○ Male .48, .2-1.16</li> <li>○ Non Saudi vs Saudi. .33, .13-.81</li> <li>○ Kidney Disease .8, .21-3.06</li> <li>○ Diabetes .36, .12-1.15</li> </ul>                                           |  |                                                                                                                                                                                                                    |
| Trifan et al., 2020<br>(Chicago, United States) | Median<br>64                       | 83  | R | <ul style="list-style-type: none"> <li>○ Male 4.02, 1.14-14.18</li> </ul>                                                                                                                                                                                                                                        |  |                                                                                                                                                                                                                    |
| Argirios et al., 2020<br>(Spain)                | n/a                                | 32  | R |                                                                                                                                                                                                                                                                                                                  |  | <ul style="list-style-type: none"> <li>○ Age continuous <ul style="list-style-type: none"> <li>○ ICU mean 73.5 Sd 12.9</li> <li>○ Non-ICU mean 68.2 Sd 20.4</li> </ul> </li> <li>○ Male 9.09, .98-84.28</li> </ul> |
| Cao et al., 2021<br>(Wuhan, China)              | Median<br>68<br><br>IQR<br>61.5-74 | 74  | R | (HR) <ul style="list-style-type: none"> <li>○ Age <math>\geq 70</math> vs <math>&lt; 70</math> 1.8, 1.08-2.99</li> <li>○ Male .99, .57-1.73</li> <li>○ Hypertension 1.38, .83-2.32</li> <li>○ Diabetes 1.22, .65-2.31</li> </ul>                                                                                 |  |                                                                                                                                                                                                                    |
| Yildirim et al., 2021<br>(Turkey)               | Mean<br>49.2<br>Sd 20.8            | 139 | R | <ul style="list-style-type: none"> <li>○ Age continuous 1.13 .03-1.25</li> <li>○ Gender 1.2 .13-11.46</li> <li>○ Hypertension 1.15, 0-80.73</li> <li>○ Diabetes .34, .04-2.84</li> <li>○ Cardiovascular Disease .29, 0-164.88</li> <li>○ Chronic Obstructive Pulmonary Disease/Asthma 1.72, .05-54.94</li> </ul> |  |                                                                                                                                                                                                                    |

|                                 |                              |     |   |                                                                                                                                                                                                                                                                                                                                                                                                                                                                                                                                                                                                 |                                                                                                                                                           |  |
|---------------------------------|------------------------------|-----|---|-------------------------------------------------------------------------------------------------------------------------------------------------------------------------------------------------------------------------------------------------------------------------------------------------------------------------------------------------------------------------------------------------------------------------------------------------------------------------------------------------------------------------------------------------------------------------------------------------|-----------------------------------------------------------------------------------------------------------------------------------------------------------|--|
|                                 |                              |     |   | <ul style="list-style-type: none"> <li>○ Chronic Renal Insufficiency .14, 0-80.73</li> <li>○ Malignancy .14, 0-4.46</li> </ul>                                                                                                                                                                                                                                                                                                                                                                                                                                                                  |                                                                                                                                                           |  |
| Turgutalp et al., 2021 (Turkey) | Median 63<br>IQR 53-71       | 567 | R | <ul style="list-style-type: none"> <li>○ Age continuous</li> <li>○ Median survivor 63</li> <li>○ Median nonsurvivor 66</li> <li>○ Male 1.33, .85-2.08</li> <li>○ Diabetes 1.01, .65-1.58</li> <li>○ Hypertension .81, .48-1.37</li> <li>○ Ischemic Heart Disease 1.35, .86-2.11</li> <li>○ Cardiovascular Disease 1.36, .87-2.13</li> <li>○ Congestive Heart Failure 2.03, 1.24-3.32</li> <li>○ Chronic Obstructive Pumonary Disease 2.17, 1.24-3.79</li> <li>○ Malignancy 1.29, .51-3.26</li> </ul><br>(HR) <ul style="list-style-type: none"> <li>○ Age continuous 1.02, 1.00-1.04</li> </ul> | <ul style="list-style-type: none"> <li>○ Age continuous mild-moderate vs severe-critical</li> <li>○ Median mild 63</li> <li>○ Median severe 64</li> </ul> |  |
| Haq et al., 2020 (Pakistan)     | ≥18<br>Mean 48.7<br>Sd 17.74 | 179 | R | <ul style="list-style-type: none"> <li>○ Age continuous</li> <li>○ Mean survivor 44.1</li> <li>○ Mean nonsurvivor 60.3</li> <li>○ Male .36, .16-.82</li> </ul>                                                                                                                                                                                                                                                                                                                                                                                                                                  |                                                                                                                                                           |  |

|                               |                        |     |   |                                                                                                                                                                                                                                                                                                                                                                                                                                                                                                                           |  |                                                                                                                                                                                                                                                                                                                                                                                                                                                                          |
|-------------------------------|------------------------|-----|---|---------------------------------------------------------------------------------------------------------------------------------------------------------------------------------------------------------------------------------------------------------------------------------------------------------------------------------------------------------------------------------------------------------------------------------------------------------------------------------------------------------------------------|--|--------------------------------------------------------------------------------------------------------------------------------------------------------------------------------------------------------------------------------------------------------------------------------------------------------------------------------------------------------------------------------------------------------------------------------------------------------------------------|
|                               |                        |     |   | <ul style="list-style-type: none"> <li>○ Age &gt;60 vs ≤ 60 2.7, .5-14</li> <li>○ Unemployed vs Employed 2.13, .97-4.68</li> <li>○ Hypertension 7.38, 3.44-15.85</li> <li>○ Coronary Heart Disease 6.74, 2.86-15.88</li> <li>○ Diabetes Mellitus 3.68, 1.82-7.43</li> <li>○ Asthma 1.24, .36-4.31</li> <li>○ Chronic Obstructive Pulmonary Disease 4.22, 1.42-12.55</li> <li>○ Chronic Kidney Disease 5.04, .45-56.85</li> <li>○ Smoking History 1.79, .88-3.62</li> <li>○ Multi-morbid condition 3.2, 1.1-9.1</li> </ul> |  |                                                                                                                                                                                                                                                                                                                                                                                                                                                                          |
| Vanhems et al., 2021 (France) | Median 72<br>IQR 57-83 | 412 | P |                                                                                                                                                                                                                                                                                                                                                                                                                                                                                                                           |  | <ul style="list-style-type: none"> <li>○ Age ≥ 70 vs &lt; 70 .75, .47-1.2</li> <li>○ Male 1.66, .76-3.62</li> <li>○ Cardiovascular Disease .61, .38-.97</li> <li>○ Diabetes .97, .54-1.74</li> <li>○ Chronic Lung Disease 1.02, .53-1.94</li> <li>○ Renal Disease 1.63, .88-3.05</li> <li>○ Malignancy 1.09, .56-2.13</li> <li>○ Chronic Nuerological Disease .49, .21-1.13</li> <li>○ Liver Disease .99, .39-2.54</li> <li>○ Immunodeficiency 1.05, .41-2.69</li> </ul> |

|                                   |                                     |        |   |                                                                                                                                                                                                                                                                                                                                                                                                                                                                                                                                                                                              |                                                                                                                                                                                                                                                                                                                                                                                                                                                     |
|-----------------------------------|-------------------------------------|--------|---|----------------------------------------------------------------------------------------------------------------------------------------------------------------------------------------------------------------------------------------------------------------------------------------------------------------------------------------------------------------------------------------------------------------------------------------------------------------------------------------------------------------------------------------------------------------------------------------------|-----------------------------------------------------------------------------------------------------------------------------------------------------------------------------------------------------------------------------------------------------------------------------------------------------------------------------------------------------------------------------------------------------------------------------------------------------|
| Venturini et al., 2021<br>(Italy) | ≥18<br>Median<br>75<br>IQR<br>72-77 | 176    | R | <ul style="list-style-type: none"> <li>○ Age continuous</li> <li>○ Median discharged 72</li> <li>○ Median deceased 86</li> <li>○ Male 1.06, .5-2.25</li> <li>○ BMI continuous</li> <li>○ Median discharged 25.9</li> <li>○ Median deceased 25.2</li> <li>○ Hypertension 1.66, .77-3.61</li> <li>○ Coronary Artery Disease 3, 1.19-7.54</li> <li>○ Diabetes 1.33, .48-3.71</li> <li>○ Obesity .84, .22-3.15</li> <li>○ Atrial Fibrillation 2.24, .92-5.46</li> <li>○ Dementia 6.82, 2.92-15.89</li> <li>○ Respiratory Disease .84, .17-4.15</li> <li>○ Liver Failure 2.1, .48-9.26</li> </ul> | <ul style="list-style-type: none"> <li>○ Age continuous</li> <li>○ Median discharged 72</li> <li>○ Median ICU 68</li> <li>○ Male 2.37, .87-6.48</li> <li>○ Hypertension 1.18, .47-2.94</li> <li>○ Coronary Artery Disease 2.21, .7-6.91</li> <li>○ Diabetes 1.89, .61-5.85</li> <li>○ Obesity 2.62, .82-8.38</li> <li>○ Atrial Fibrillation .89, .24-3.31</li> <li>○ Dementia .31, .04-2.44</li> <li>○ Respiratory Disease .66, .08-5.56</li> </ul> |
| Zertuche et al., 2021<br>(Mexico) | Mean<br>46.6<br>Sd 15.5             | 15,529 | R | (HR) <ul style="list-style-type: none"> <li>○ Obesity 2.47, .04-2.98</li> <li>○ Chronic Obstructive Pulmonary Disease 1.72, 1.05-2.84</li> <li>○ Asthma .63, .24-1.7</li> <li>○ Immunosuppression 2.54, 1.46-4.43</li> <li>○ Hypertension 1.33, 1.08-1.64</li> <li>○ Cardiovascular Disease 2.0, 1.15-3.48</li> </ul>                                                                                                                                                                                                                                                                        | (OR) <ul style="list-style-type: none"> <li>○ Diabetes 1.46, 1.06-1.99</li> <li>○ Obesity 1.9, 1.46-2.47</li> <li>○ Chronic Obstructive Pulmonary Disease 1.49, .65-3.4</li> <li>○ Asthma .81, .29-2.2</li> <li>○ Immunosuppression 2.17, .92-5.13</li> <li>○ Hypertension 1.17, .86-1.59</li> <li>○ Cardiovascular Disease 2.03, .95-4.43</li> </ul>                                                                                               |

|                                            |                                                     |     |   |                                                                                                                                                                                                                                                                                                                                                                                                                                                                                                                                                                                                      |  |                                                                                                                                                                                                                                                                                                                                              |
|--------------------------------------------|-----------------------------------------------------|-----|---|------------------------------------------------------------------------------------------------------------------------------------------------------------------------------------------------------------------------------------------------------------------------------------------------------------------------------------------------------------------------------------------------------------------------------------------------------------------------------------------------------------------------------------------------------------------------------------------------------|--|----------------------------------------------------------------------------------------------------------------------------------------------------------------------------------------------------------------------------------------------------------------------------------------------------------------------------------------------|
|                                            |                                                     |     |   | <ul style="list-style-type: none"> <li>○ Chronic Kidney Disease 1.24, .46-3.34</li> </ul>                                                                                                                                                                                                                                                                                                                                                                                                                                                                                                            |  | <ul style="list-style-type: none"> <li>○ Chronic Kidney Disease 1.53, 1.45-5.23</li> </ul>                                                                                                                                                                                                                                                   |
| Verma et al., 2021<br>(NYC, United States) | (0-21)<br><br>Median<br>5y<br>IQR<br>2.5m-<br>15.2y | 82  | R |                                                                                                                                                                                                                                                                                                                                                                                                                                                                                                                                                                                                      |  | <ul style="list-style-type: none"> <li>○ Age continuous <ul style="list-style-type: none"> <li>○ Median acute 6.7 months</li> <li>○ Median critical 10 years</li> </ul> </li> <li>○ Asthma 2.06, .58-7.32</li> <li>○ Obesity 4.44, 1.5-13.17</li> <li>○ Chronic Lung Disease 8.7, .86-88.49</li> <li>○ Malignancy 3.82, .92-15.78</li> </ul> |
| Llamas et al., 2021<br>(Spain)             | Median<br>71<br>IQR<br>58-82                        | 609 | R | <ul style="list-style-type: none"> <li>○ Age continuous 1.01, 1.06-1.1</li> <li>○ Male 1.61, 1.04-2.51</li> <li>○ BMI continuous .98, .91-1.07</li> <li>○ Charlson Age Index 1.48, 1.34-1.63</li> <li>○ Smoking 1.47, .97-2.24</li> <li>○ Hypertension 2.89, 1.87-4.46</li> <li>○ Diabetes 1.94, 1.27-2.95</li> <li>○ Dyslipidemia 1.63, 1.1-2.42</li> <li>○ Chronic Heart Disease 3.01, 2.01-4.5</li> <li>○ Atrial Fibrillation 3.68, 2.39-6.23</li> <li>○ Chronic Lung Disease 1.42, .92-2.2</li> <li>○ Cerebrovascular Disease 1.7, .9-3.2</li> <li>○ Immunosuppression 2.37, 1.3-4.32</li> </ul> |  |                                                                                                                                                                                                                                                                                                                                              |

|                               |                                    |    |   |                                                                                                                                                                                                                                                                                                                              |                                                                                                                                                                                                                                                                                                                                                                                                                                                                  |  |
|-------------------------------|------------------------------------|----|---|------------------------------------------------------------------------------------------------------------------------------------------------------------------------------------------------------------------------------------------------------------------------------------------------------------------------------|------------------------------------------------------------------------------------------------------------------------------------------------------------------------------------------------------------------------------------------------------------------------------------------------------------------------------------------------------------------------------------------------------------------------------------------------------------------|--|
|                               |                                    |    |   | <ul style="list-style-type: none"> <li>○ Chronic Kidney Disease 4.13, 2.22-7.69</li> <li>○ Dementia 2.34, 1.18-4.61</li> <li>○ Chronic Liver Disease .77, .29-2.07</li> </ul>                                                                                                                                                |                                                                                                                                                                                                                                                                                                                                                                                                                                                                  |  |
| Villa et al., 2021 (Germany)  | Median 62<br>IQR (55-68)           | 21 | R | <ul style="list-style-type: none"> <li>○ Kidney Transplant w/ Covid 2.75, .38-19.67</li> </ul>                                                                                                                                                                                                                               | <ul style="list-style-type: none"> <li>○ Age continuous <ul style="list-style-type: none"> <li>○ Median ARDS 23.8</li> <li>○ Median non-ARDS 67</li> </ul> </li> <li>○ BMI continuous <ul style="list-style-type: none"> <li>○ Median ARDS 23.8</li> <li>○ Median non-ARDS 28.3</li> </ul> </li> <li>○ Hypertension 1, .07-13.37</li> <li>○ Diabetes Mellitus .75, .12-4.66</li> </ul>                                                                           |  |
| Vizcarra et al., 2020 (Spain) | ≥18<br><br>Mean 53.3<br>Sd 9.5     | 51 | P |                                                                                                                                                                                                                                                                                                                              | <ul style="list-style-type: none"> <li>○ Age continuous <ul style="list-style-type: none"> <li>○ Median mild/moderate 55.4</li> <li>○ Median severe 55.5</li> </ul> </li> <li>○ BMI continuous <ul style="list-style-type: none"> <li>○ Median mild/moderate 25.5</li> <li>○ Median severe 24.3</li> </ul> </li> <li>○ Male 2.71, .3-24.42</li> <li>○ Smoker 8.73, 1.03-74.12</li> <li>○ Hypertension 1.2, .33-4.42</li> <li>○ Diabetes .44, .05-4.09</li> </ul> |  |
| Vrillon et al., 2021 (France) | ≥ 65<br><br>Median 86<br>IQR 82-90 | 86 | P | <ul style="list-style-type: none"> <li>○ Age continuous <ul style="list-style-type: none"> <li>○ Median survivors 87</li> <li>○ Median nonsurvivors 86</li> </ul> </li> <li>○ Charlson Comorbidity Index <ul style="list-style-type: none"> <li>○ Median survivors 6</li> <li>○ Median nonsurvivors 6</li> </ul> </li> </ul> |                                                                                                                                                                                                                                                                                                                                                                                                                                                                  |  |

|                                 |                                             |       |   |                                                                                                                                                                                                                                                                                                                                                                                                                                           |  |  |
|---------------------------------|---------------------------------------------|-------|---|-------------------------------------------------------------------------------------------------------------------------------------------------------------------------------------------------------------------------------------------------------------------------------------------------------------------------------------------------------------------------------------------------------------------------------------------|--|--|
|                                 |                                             |       |   | <ul style="list-style-type: none"> <li>○ Male 1.12, .38-3.31</li> <li>○ Dementia .96, .41-2.27</li> <li>○ Cardiovascular Disease 1.62, .7-3.78</li> <li>○ Hypertension 1.19, .4-3.54</li> <li>○ Atrial Fibrillation 1.01, .38-2.68</li> <li>○ Chronic obstructive Pulmonary Disease 3.3, .92-11.76</li> <li>○ Respiratory Insufficiency 1.16, .12-11.61</li> <li>○ Diabetes 1.49, .52-4.29</li> <li>○ Malignancy .29, .04-2.35</li> </ul> |  |  |
| Vrotsou et al., 2021 (Spain)    | <p>≥ 14</p> <p>Mean 53.7</p> <p>Sd 17.4</p> | 14197 | R | <ul style="list-style-type: none"> <li>○ Age continuous <ul style="list-style-type: none"> <li>○ Mean hospital/ICU 62.8</li> <li>○ Mean nonsurvivors 82.3</li> </ul> </li> <li>○ Male 1.94, 1.68-2.25</li> <li>○ Income &lt;18k€ vs ≥ 18k€ 2.34, 1.82-3.01</li> </ul>                                                                                                                                                                     |  |  |
| Vu et al., 2020 (United States) | <p>(26-87)</p> <p>Median 54</p>             | 63    | R | <ul style="list-style-type: none"> <li>○ Age continuous <ul style="list-style-type: none"> <li>○ Median nonsurvivors 58</li> </ul> </li> <li>○ Male 4.75, .55-40.98</li> <li>○ Hispanic 1.19, .27-5.31</li> <li>○ Black .93, .17-5.08</li> <li>○ White .94, .1-8.86</li> <li>○ Obese 1.52, .34-6.75</li> <li>○ Hypertension 9, 1.05-77.29</li> </ul>                                                                                      |  |  |



|                                             |                                                     |      |   |                                     |                                                                                                                                                                                                                                 |                                                                                                                                                                                                                                                                                                                                                                                                                                                                                                                                                                 |
|---------------------------------------------|-----------------------------------------------------|------|---|-------------------------------------|---------------------------------------------------------------------------------------------------------------------------------------------------------------------------------------------------------------------------------|-----------------------------------------------------------------------------------------------------------------------------------------------------------------------------------------------------------------------------------------------------------------------------------------------------------------------------------------------------------------------------------------------------------------------------------------------------------------------------------------------------------------------------------------------------------------|
|                                             |                                                     |      |   | ○ Diabetes 1.63, .35-7.5            |                                                                                                                                                                                                                                 |                                                                                                                                                                                                                                                                                                                                                                                                                                                                                                                                                                 |
| Wang F et al., 2020a<br>(Wuhan, China)      | Median<br>64<br>IQR<br>53-71                        | 7283 | R |                                     |                                                                                                                                                                                                                                 | <ul style="list-style-type: none"> <li>○ Age <math>\geq 60</math> vs <math>&lt; 60</math> 1.76, 1.52-2.03</li> <li>○ Male 1.57, 1.33-1.86</li> <li>○ Other areas vs central Wuhan. 1.62, 1.30-2.04</li> <li>○ Occupation <ul style="list-style-type: none"> <li>○ Reference: Others</li> <li>○ Medical Workers 1.25, .73-2.13</li> <li>○ Retirees .82, .68-1</li> </ul> </li> <li>○ Diabetes 2.11, 1.32-3.38</li> <li>○ Hypertension 2.72, 1.97-3.76</li> <li>○ Cardiovascular Disease 2.15, 1.38-3.33</li> <li>○ Respiratory Disease 3.5, 1.67-7.34</li> </ul> |
| Wang F et al., 2020b<br>(Shenzhen, China)   | (8 months-86 y)<br><br>Median<br>46<br>IQR<br>33-59 | 333  | R |                                     | <ul style="list-style-type: none"> <li>○ Age <math>&gt; 65</math> vs <math>\leq 65</math> 3.22, 1.51-6.87</li> <li>○ Male 2.21, 1.2-4.07</li> <li>○ Comorbidities (yes vs no) 1.78, 1.13-2.81</li> </ul>                        |                                                                                                                                                                                                                                                                                                                                                                                                                                                                                                                                                                 |
| Wang Gang et al., 2021<br>(Wuhan, China)    | Median<br>50.5<br>IQR<br>37-64                      | 1184 | R | ○ Wuhan vs Sichuan. 7.64, 2.3-25.27 |                                                                                                                                                                                                                                 | ○ Wuhan vs Sichuan. 1.66, 1.05-2.63                                                                                                                                                                                                                                                                                                                                                                                                                                                                                                                             |
| Wang Guyi et al., 2020<br>(Changsha, China) | Median<br>45.5<br>IQR<br>36-60                      | 228  | R |                                     | (HR)<br><ul style="list-style-type: none"> <li>○ Age continuous 1.03, 1.01-1.06</li> <li>○ Gender (unspecified) .62, .27-1.45</li> <li>○ Hypertension 1.58, .59-4.19</li> <li>○ Cardiovascular Disease .89, .12-7.36</li> </ul> |                                                                                                                                                                                                                                                                                                                                                                                                                                                                                                                                                                 |
| Wang Juan et al., 2020<br>(China)           | (5-87)                                              | 562  | R |                                     | ○ Age $> 60$ vs $\leq 60$ 3.75, 2.07-6.8                                                                                                                                                                                        |                                                                                                                                                                                                                                                                                                                                                                                                                                                                                                                                                                 |

|                                             |                                            |     |   |                                                                                                                                                                                                                                                                                                                                                                                                     |                                                                                                                                                                                                                                                                                                                                                                                                                     |  |
|---------------------------------------------|--------------------------------------------|-----|---|-----------------------------------------------------------------------------------------------------------------------------------------------------------------------------------------------------------------------------------------------------------------------------------------------------------------------------------------------------------------------------------------------------|---------------------------------------------------------------------------------------------------------------------------------------------------------------------------------------------------------------------------------------------------------------------------------------------------------------------------------------------------------------------------------------------------------------------|--|
|                                             | Median<br>47<br>IQR<br>35-57               |     |   |                                                                                                                                                                                                                                                                                                                                                                                                     | <ul style="list-style-type: none"> <li>Male .66, .37-1.2</li> </ul>                                                                                                                                                                                                                                                                                                                                                 |  |
| Wang Junhong et al., 2020<br>(Wuhan, China) | Median<br>62.3<br>Sd 14                    | 243 | R | <ul style="list-style-type: none"> <li>Age continuous</li> <li>Median survivor 64</li> <li>Median nonsurvivor 69.5</li> <li>Male 2.07, .84-5.09</li> <li>Hypertension 1.65, .7-3.89</li> <li>Diabetes 2.58, 1.04-6.41</li> <li>Coronary Heart Disease .67, .15-3.04</li> <li>Chronic Obstructive Pulmonary Disease 4.34, 1.34-14.04</li> <li>Stroke 12.36, 1.95-78.25</li> </ul>                    | <ul style="list-style-type: none"> <li>Age continuous</li> <li>Median moderate 58.1</li> <li>Median severe 64.6</li> <li>Male 1.68, .93-3.02</li> <li>Hypertension 2.02, 1.11-3.69</li> <li>Diabetes 1.22, .58-2.53</li> <li>Coronary Heart Disease 1.1, .44-2.71</li> <li>Chronic Obstructive Pulmonary Disease 1.95, .39-9.65</li> <li>Stroke .81, .13-4.96</li> <li>Other Comorbidities .63, .19-2.16</li> </ul> |  |
| Wang Lang et al., 2020<br>(Wuhan, China)    | (≥ 60)<br><br>Median<br>69<br>IQR<br>65-76 | 339 | R | (HR) <ul style="list-style-type: none"> <li>Age continuous 1.06, 1.03-1.1</li> <li>Female .61, .27-1.01</li> <li>Hypertension 1.49, .92-2.44</li> <li>Diabetes 1.09, .57-2.08</li> <li>Chronic Liver Disease 2.9, .4-20.9</li> <li>Cardiovascular Disease 1.85, 1.06-3.26</li> <li>Cerebrovascular Disease 1.38, .65-2.93</li> <li>Chronic Obstructive Pulmonary Disease 2.24, 1.12-4.50</li> </ul> |                                                                                                                                                                                                                                                                                                                                                                                                                     |  |

|                                             |                                       |     |   |                                                                                                                                                                                                                                                                                                                                                                                                              |                                                                                                                                                                                                                                                                                      |  |
|---------------------------------------------|---------------------------------------|-----|---|--------------------------------------------------------------------------------------------------------------------------------------------------------------------------------------------------------------------------------------------------------------------------------------------------------------------------------------------------------------------------------------------------------------|--------------------------------------------------------------------------------------------------------------------------------------------------------------------------------------------------------------------------------------------------------------------------------------|--|
|                                             |                                       |     |   | <ul style="list-style-type: none"> <li>○ Arrhythmia, .75, .37-1.53</li> <li>○ Acute Kidney Injury 1.16, .56-2.41</li> <li>○ Acute Respiratory Distress Syndrome 29.33, 12.37-69.58</li> <li>○ Cardiac Insufficiency 1.11, .59-2.06</li> <li>○ Malignancy .98, .31-3.13</li> <li>○ Autoimmune Disease 1.1, .15-7.91</li> <li>○ Shock 2.42, .76-7.7</li> <li>○ Acute Cardiac Injury 9.15, 5.3-15.57</li> </ul> |                                                                                                                                                                                                                                                                                      |  |
| Wang Peng et al., 2020<br>(China)           | (40-59)<br><br>Median 50<br>IQR 45-54 | 119 | R |                                                                                                                                                                                                                                                                                                                                                                                                              | <ul style="list-style-type: none"> <li>○ Age continuous</li> <li>○ Median non-severe 50</li> <li>○ Median severe 51</li> <li>○ Male 1.5, .5-4.55</li> </ul>                                                                                                                          |  |
| Wang Sijiao et al., 2020<br>(Fujian, China) | (16-93)<br><br>Median 46.3<br>Sd 16.4 | 199 | R |                                                                                                                                                                                                                                                                                                                                                                                                              | <ul style="list-style-type: none"> <li>○ Age <math>\geq 75</math> vs <math>&lt; 75</math> 5.61, 1.16-27.12</li> <li>○ Male 2.23, .56-8.77</li> <li>○ Hypertension 3.44, 1.06-11.16</li> <li>○ Diabetes 6.94, 1.65-29.22</li> <li>○ Cardiovascular Disease 2.51, .45-13.85</li> </ul> |  |
| Wang Sufei et al., 2020<br>(Wuhan, China)   | Median 59<br>IQR 47-68                | 605 | R | (OR) <ul style="list-style-type: none"> <li>○ Age <math>\geq 65</math> vs <math>&lt; 65</math> 3.61, 2.37-5.5</li> </ul> (HR) <ul style="list-style-type: none"> <li>○ Age continuous 1.02, 1.00-1.04</li> <li>○ Male 1.75, 1.17-2.60</li> </ul>                                                                                                                                                             |                                                                                                                                                                                                                                                                                      |  |

|                                         |                        |      |   |                                                                                                                                                                                                                                                                                                                                                                       |                                                                                                                                                                                                                                                                                                                                                                                                      |                                                                                                                                                                                                     |
|-----------------------------------------|------------------------|------|---|-----------------------------------------------------------------------------------------------------------------------------------------------------------------------------------------------------------------------------------------------------------------------------------------------------------------------------------------------------------------------|------------------------------------------------------------------------------------------------------------------------------------------------------------------------------------------------------------------------------------------------------------------------------------------------------------------------------------------------------------------------------------------------------|-----------------------------------------------------------------------------------------------------------------------------------------------------------------------------------------------------|
|                                         |                        |      |   | <ul style="list-style-type: none"> <li>○ Hypertension 1.27, .85-1.89</li> <li>○ Chronic Lung Disease 1.12, .41-3.03</li> <li>○ Chronic Heart Disease 1.34, .75-2.39</li> <li>○ Chronic Liver Disease .95, .30-2.99</li> <li>○ Chronic Kidney Disease 2.28, 1.0-5.19</li> <li>○ Cerebrovascular Disease 2.82, 1.31-6.05</li> <li>○ Carcinoma 1.81, .92-3.58</li> </ul> |                                                                                                                                                                                                                                                                                                                                                                                                      |                                                                                                                                                                                                     |
| Wang Tao et al., 2020 (China)           | Median 64<br>IQR 55-70 | 141  | P | (HR) <ul style="list-style-type: none"> <li>○ Chronic Obstructive Pulmonary Disease 4.57, 1.65-12.69</li> <li>○ Chronic Renal Disease 5.45, 1.85-16.12</li> </ul>                                                                                                                                                                                                     |                                                                                                                                                                                                                                                                                                                                                                                                      | (OR)<br>Invasive mechanical ventilation vs noninvasive mechanical ventilation <ul style="list-style-type: none"> <li>○ Male 1.67, .49-5.62</li> <li>○ Age &gt; 65 vs ≤ 65 1.03, .98-1.07</li> </ul> |
| Wang Wen et al., 2021 (Sichuan, China)  | Median 44<br>IQR 33-50 | 169  | R |                                                                                                                                                                                                                                                                                                                                                                       | <ul style="list-style-type: none"> <li>○ Age &gt; 65 vs ≤ 65 1.92, .5-6.24</li> <li>○ Male 2.27, .85-6.1</li> <li>○ Pulmonary Disease 7.80, 2.14-29.72</li> <li>○ Hypertension 5.05, 1.73-14.48</li> <li>○ Diabetes 3.87, 1.0-14.93</li> <li>○ Cardiovascular Disease 4.68, 1.16-18.93</li> <li>○ Chronic Kidney Disease 5.45, .73-40.79</li> <li>○ Chronic Liver Disease 1.28, .14-12.0)</li> </ul> |                                                                                                                                                                                                     |
| Wang Wenjun et al., 2021 (Wuhan, China) | ≥ 18                   | 2433 | R | (HR) <ul style="list-style-type: none"> <li>○ Age &lt;60 vs 60-74 1.26, 1.02-1.56</li> </ul>                                                                                                                                                                                                                                                                          | <ul style="list-style-type: none"> <li>○ Age continuous</li> <li>○ Median mild 36</li> <li>○ Median moderate 58</li> </ul>                                                                                                                                                                                                                                                                           | <ul style="list-style-type: none"> <li>○ Age continuous</li> <li>○ Median critical 67</li> </ul>                                                                                                    |

|                                        |                                               |      |    |                                                                                                                                                                     |                                                                                                                                                                                                                                                                                                                                                                                                                                                                                                                                                                                                                                                                        |                                                                                                                                                                                                                                                                                                                                                                                                                                                                 |
|----------------------------------------|-----------------------------------------------|------|----|---------------------------------------------------------------------------------------------------------------------------------------------------------------------|------------------------------------------------------------------------------------------------------------------------------------------------------------------------------------------------------------------------------------------------------------------------------------------------------------------------------------------------------------------------------------------------------------------------------------------------------------------------------------------------------------------------------------------------------------------------------------------------------------------------------------------------------------------------|-----------------------------------------------------------------------------------------------------------------------------------------------------------------------------------------------------------------------------------------------------------------------------------------------------------------------------------------------------------------------------------------------------------------------------------------------------------------|
|                                        | Median<br>60<br>IQR<br>50-68                  |      |    | <ul style="list-style-type: none"> <li>Age &lt;60 vs &gt;74 3.41, 1.07-10.89</li> </ul>                                                                             | <ul style="list-style-type: none"> <li>Median severe 65</li> </ul> (HR) <ul style="list-style-type: none"> <li>Age &lt;60 vs 60-74 1.26, 1.02-1.56</li> <li>Age &lt;60 vs &gt;74 1.44, 1.02-2.03</li> </ul> (OR) <ul style="list-style-type: none"> <li>Male .85, .71-1.02</li> <li>Smoking .98, .7-1.36</li> <li>Drinking .74, .49-1.1</li> <li>Hypertension 1.64, 1.36-1.99</li> <li>Diabetes 1.33, 1.04-1.71</li> <li>Coronary Heart Disease 1.96, 1.41-2.73</li> <li>Cancer 1.15, .58-2.26</li> <li>Cerebrovascular Disease 2.2, 1.42-3.42</li> <li>Chronic Kidney Disease 2.08, 1.1-3.91</li> <li>Chronic Obstructive Pulmonary Disease 2.79, 1.1-7.07</li> </ul> | (OR) <ul style="list-style-type: none"> <li>Male .66, .35-1.24</li> <li>Smoking 1.57, .61-4.04</li> <li>Drinking 1.66, .58-4.73</li> <li>Hypertension .93, .51-1.72</li> <li>Diabetes 1.07, .47-2.44</li> <li>Coronary Heart Disease 1.56, .55-4.43</li> <li>Cancer 1.98, .26-14.87</li> <li>Cerebrovascular Disease 3.02, 1.05-8.67</li> <li>Chronic Kidney Disease 4.77, 1.41-16.11</li> <li>Chronic Obstructive Pulmonary Disease 3.38, .44-25.98</li> </ul> |
| Wang X. et al., 2020<br>(Wuhan, China) | (16-89)<br><br>Median<br>55.5<br>IQR<br>47-62 | 1012 | R  |                                                                                                                                                                     | <ul style="list-style-type: none"> <li>Age <math>\geq</math> 60 vs &lt; 60 2.1, 1.36-3.25</li> <li>Male 1.59, 1.04-2.43</li> <li>Hypertension 1.39, .57-3.37</li> <li>Diabetes 3.36, 1.38-8.15</li> <li>Cardiovascular Disease 4.75, 1.59-14.18</li> <li>Respiratory Disease 1.02, .23-4.44</li> <li>Other Diseases .88, .26-2.93</li> </ul>                                                                                                                                                                                                                                                                                                                           |                                                                                                                                                                                                                                                                                                                                                                                                                                                                 |
| Seo et al., 2020 (Korea)               | Mean<br>65years                               | 4932 | CS | <ul style="list-style-type: none"> <li>Exposure to RAAS within 1year 0.88 (0.55-1.40)</li> <li>Exposure to ACEs inhibitors within 1year 0.71 (0.32-1.58)</li> </ul> |                                                                                                                                                                                                                                                                                                                                                                                                                                                                                                                                                                                                                                                                        |                                                                                                                                                                                                                                                                                                                                                                                                                                                                 |

|                        |                    |    |    |                                                                                                                                                                                                                                                                                                                                                                                                                                                                                                                          |                                                                                                                                                                                                                                                                                                                                                                                                                                                                                  |  |
|------------------------|--------------------|----|----|--------------------------------------------------------------------------------------------------------------------------------------------------------------------------------------------------------------------------------------------------------------------------------------------------------------------------------------------------------------------------------------------------------------------------------------------------------------------------------------------------------------------------|----------------------------------------------------------------------------------------------------------------------------------------------------------------------------------------------------------------------------------------------------------------------------------------------------------------------------------------------------------------------------------------------------------------------------------------------------------------------------------|--|
|                        |                    |    |    | <ul style="list-style-type: none"> <li>○ Exposure to ARBs within 1 year 01.02 (0.65-1.62)</li> <li>○ Exposure to RAAS within 6 months 0.94 (0.81-1.09)</li> <li>○ Exposure to ACEs inhibitors within last 6months 0.91 (0.67-1.25)</li> <li>○ Exposure to ARBs within last 6months 0.96 (0.83-1.09)</li> <li>○ Exposure to RAAS within 3 months 0.95 (0.59-1.52)</li> <li>○ Exposure to ACEs inhibitors within last 3months 0.59(0.24-1.46)</li> <li>○ Exposure to ARBs within last 3months 1.10 ( 0.69-1.76)</li> </ul> |                                                                                                                                                                                                                                                                                                                                                                                                                                                                                  |  |
| Shah et al., 2020(USA) | Median<br>62 years | 77 | CS |                                                                                                                                                                                                                                                                                                                                                                                                                                                                                                                          | <ul style="list-style-type: none"> <li>○ Myelofibrosis, AML, ALL, MDS, MPN, CML, CLL HR:1.16 (0.47-2.87)having 1 comorbidity: HR 3.3 (1.15-9.85)</li> <li>○ 2+ comorbidities: HR 5.41 (1.84-15.9)</li> <li>○ Time after cellular therapy: <ul style="list-style-type: none"> <li>○ 101-180 days: HR 0.29(0.02-2.75)</li> <li>○ 181-365 days: HR 1.08 (0.26-4.51)</li> <li>○ 366-1095 days: HR 0.61 (0.17-2.28)</li> <li>○ 1096+ days: HR 0.49 (0.13-1.90)</li> </ul> </li> </ul> |  |

|                                  |  |     |    |                                                                                                                                                                                                                                                                                                                                        |                                                                                                                                                                                                                                                                                                                                                                                                                                                                                                                                                                                                                                                                                                                                                                                               |  |
|----------------------------------|--|-----|----|----------------------------------------------------------------------------------------------------------------------------------------------------------------------------------------------------------------------------------------------------------------------------------------------------------------------------------------|-----------------------------------------------------------------------------------------------------------------------------------------------------------------------------------------------------------------------------------------------------------------------------------------------------------------------------------------------------------------------------------------------------------------------------------------------------------------------------------------------------------------------------------------------------------------------------------------------------------------------------------------------------------------------------------------------------------------------------------------------------------------------------------------------|--|
|                                  |  |     |    |                                                                                                                                                                                                                                                                                                                                        | <ul style="list-style-type: none"> <li>○ Race white vs non-white HR 0.62 (0.27-1.43)</li> <li>○ Male vs female: HR: 1.04 (0.46-2.36)</li> <li>○ Hematologic malignancy active at the time of COVID-19 diagnosis: HR 1.96 (0.88-4.38)</li> <li>○ Age: HR 1.03 (0.99-1.06)</li> <li>○ Absolute neutrophil count: HR 1.15 (1.02-1.29)</li> <li>○ Absolute lymphocyte count: HR 1.0 (0.62-1.74)</li> <li>○ Neutrophil to lymphocyte ratio: HR 1.03 (1.00-1.07)</li> <li>○ Absolute CD4* : HR 1.00 (1.00-1.00)</li> <li>○ Absolute CD8* HR 1.00 (1.00-1.00)</li> <li>○ Absolute CD19*: HR 1.00 (1.00-1.00)</li> <li>○ Absolute CD16*CD56*NK: HR 1.0 (1.00-1.00)</li> <li>○ CD4/CD8 Ratio: HR 0.97 (0.79-1.18)</li> <li>○ Never smoker Vs Current or former smokers: HR 0.72 (0.32-1.60)</li> </ul> |  |
| Shahriarirad et al., 2020 (Iran) |  | 103 | CS | <ul style="list-style-type: none"> <li>○ ≥65 years vs &lt; 65 years: OR 1.58 (0.37-6.78)</li> <li>○ Male vs Female: OR 0.7 (0.18-2.84)</li> <li>○ Hypertension : OR 1.2 (0.23-6.22)</li> <li>○ Diabetes: OR 1.84 (0.35-9.75)</li> <li>○ Cardiovascular disease: OR 1.84 (0.35-9.75)</li> <li>○ Asthma: OR 2.04 (0.22-19.10)</li> </ul> | <ul style="list-style-type: none"> <li>○ ≥65 years vs &lt; 65 years: OR 0.87 (0.21-3.51)</li> <li>○ Male vs Female: OR 1.04 (0.29-3.78)</li> <li>○ Hypertension : OR 4.17 (1.14-15.22)</li> <li>○ Diabetes: OR 2.57 (0.60-10.93)</li> <li>○ Cardiovascular disease: OR 4.29 (1.09-16.84)</li> <li>○ Asthma: OR 1.6 (0.17-14.66)</li> <li>○ COPD: OR 1.17 (0.13-10.38)</li> </ul>                                                                                                                                                                                                                                                                                                                                                                                                              |  |

|                                              |                                                            |        |    |                                                                                                                                                                                                                    |                                                                                                                                                                                                                                                                                                                         |  |
|----------------------------------------------|------------------------------------------------------------|--------|----|--------------------------------------------------------------------------------------------------------------------------------------------------------------------------------------------------------------------|-------------------------------------------------------------------------------------------------------------------------------------------------------------------------------------------------------------------------------------------------------------------------------------------------------------------------|--|
|                                              |                                                            |        |    | ○ COPD: OR 1.5 (0.17-13.54)                                                                                                                                                                                        |                                                                                                                                                                                                                                                                                                                         |  |
| Shao et al., 2020<br>(China)                 | Common group<br>46.66±14.81<br>Severe group<br>58.14±13.96 | 126    | CS |                                                                                                                                                                                                                    | ○ Age continuous OR: 1.06 1.024-1.086<br>○ Co-infection: OR 3.63 (1.60-8.20)<br>○ Hypertension: OR 3.25 (1.29-8.17)<br>○ Male: OR 0.94 (0.43-2.02)<br>○ Diabetes: OR 2.37 (0.74-7.62)<br>○ Malignancy: OR 1.26 (0.11-14.31)<br>○ Cardiovascular diseases: OR 1.26 (0.22-7.23)                                           |  |
| Sadeghi-Haddad-Zavareh et al.,2020<br>(Iran) | Mean<br>57.21 ± 16.18                                      | 429    | CS |                                                                                                                                                                                                                    | ○ Male: OR 1.35 (0.91-2.00)<br>○ Hypertension: OR 0.64 (0.40-1.02)<br>○ Cardiovascular disease: OR 0.74 (0.47-1.17)<br>○ Diabetes: OR 1.02 (0.67-1.57)<br>○ Cancer: OR 0.29 (0.08-1.13)<br>○ Chronic liver disease: OR 0.46 (0.02-2.75)<br>○ Chronic kidney disease: OR 0.18 (0.04-0.82)<br>○ COPD: OR 1.47 (0.51-4.27) |  |
| Sharma.,2020 (USA)                           | Mean 71                                                    | 34,881 | R  | ○ Age: OR 1.22 (1.05-1.42)<br>○ Male: OR 1.02 (0.92-1.12)<br>○ BMI: OR 1.04 (1.02-1.04)<br>○ Diabetes: OR 1.19 (1.08-1.32)<br>○ Hypertension: OR 1.36 (1.09-1.66)<br>○ Coronary heart disease: OR 1.12 (0.99-1.27) |                                                                                                                                                                                                                                                                                                                         |  |
| Shi et al., 2020 (China)                     |                                                            | 85     | CS |                                                                                                                                                                                                                    | ○ Age: OR 1.09 (1.02-1.17)<br>○ Male: OR 6.8 (1.44-32.20)                                                                                                                                                                                                                                                               |  |



|                          |                          |     |    |                                                                                                                                                                                                                                                                                                                                                 |                                                                                                                                                                                                                                                                                                                                                                      |  |
|--------------------------|--------------------------|-----|----|-------------------------------------------------------------------------------------------------------------------------------------------------------------------------------------------------------------------------------------------------------------------------------------------------------------------------------------------------|----------------------------------------------------------------------------------------------------------------------------------------------------------------------------------------------------------------------------------------------------------------------------------------------------------------------------------------------------------------------|--|
|                          |                          |     |    |                                                                                                                                                                                                                                                                                                                                                 | <ul style="list-style-type: none"> <li>○ Hypertension: OR 0.21 (0.52-18.88)</li> <li>○ Dsypnea: OR 2.32 (0.27-20.07)</li> </ul>                                                                                                                                                                                                                                      |  |
| Shi et al.,2020 (China)  | Mean<br>59.38 ±<br>16.54 | 161 | R  | <ul style="list-style-type: none"> <li>○ Age &gt;=70 years: OR 5.28 (1.83-15.21)</li> <li>○ Male: OR 0.65 (0.24-1.79)</li> <li>○ Hypertension: OR 1.58 (0.57-4.37)</li> <li>○ Cardiovascular disease: OR 1.83 (0.52-6.42)</li> <li>○ Chronic pulmonary disease: OR 2.40 (0.68-8.51)</li> <li>○ Diabetes: OR 2.18 (1.13-4.17)</li> </ul>         |                                                                                                                                                                                                                                                                                                                                                                      |  |
| Shields et al.,2020 (UK) |                          | 100 | CS | <ul style="list-style-type: none"> <li>○ Female: OR 1.08 (0.30-3.65)</li> <li>○ Chronic lung disease: OR 3.33 (0.92-10.87)</li> <li>○ Cardiovascular disease: OR 2.20 (0.37-10.86)</li> <li>○ Chronic liver disease: 1.72 (0.30-10.74)</li> <li>○ Diabetes: OR 7.50 (1.67-32.66)</li> <li>○ Chronic GIT disease: OR 0.87 (0.17-4.12)</li> </ul> |                                                                                                                                                                                                                                                                                                                                                                      |  |
| Siepmann et al., 2020    | Merdian<br>66            | 101 | CS |                                                                                                                                                                                                                                                                                                                                                 | <ul style="list-style-type: none"> <li>○ Male: OR 2.77 (1.10-6.99)</li> <li>○ Hypertension: OR 5.99 (2.28-15.79)</li> <li>○ Hyperlipidemia: OR 1.39 (0.49-3.9)</li> <li>○ Diabetes: OR 3.68 (1.005-13.47)</li> <li>○ Atrial fibrillation: OR 2.03 (0.54-7.67)</li> <li>○ Smoking: 0.37 (0.11-1.21)</li> <li>○ Coronary heart disease: OR 1.40 (0.36-5.44)</li> </ul> |  |

|                          |               |        |    |                                                                                                                                                                                                                                                                                                                                                                                                                                                  |                                                                                                                                                 |  |
|--------------------------|---------------|--------|----|--------------------------------------------------------------------------------------------------------------------------------------------------------------------------------------------------------------------------------------------------------------------------------------------------------------------------------------------------------------------------------------------------------------------------------------------------|-------------------------------------------------------------------------------------------------------------------------------------------------|--|
|                          |               |        |    |                                                                                                                                                                                                                                                                                                                                                                                                                                                  | <ul style="list-style-type: none"> <li>○ Cerebrovascular disease: OR 6.61 (0.83-52.71)</li> <li>○ Ischemic stroke: OR 6 (0.74-48.67)</li> </ul> |  |
| Singh et al.,2021 (USA)  | Mean 50 years | 5558   | P  | <ul style="list-style-type: none"> <li>○ Age: OR 1.05 (1.03-1.07)</li> <li>○ Male: OR 1.91 (1.3-2.83)</li> <li>○ Smoking (former&amp;current): OR 0.01 (0-0.04)</li> <li>○ BMI: OR 0.92 (0.86-0.98)</li> <li>○ <math>\geq 3</math> comorbidities: OR 1.64 (1-2.67)</li> <li>○ Cardiac failure: OR 1.82 (1.14-2.92)</li> <li>○ Chronic kidney disease: OR 1.69 (1.09-2.63)</li> <li>○ Peripheral vascular disease: OR 2.27 (1.12-4.59)</li> </ul> |                                                                                                                                                 |  |
| Singh et al.,2020 (USA)  | Mean 49 years | 41513  | CS | <ul style="list-style-type: none"> <li>○ Obesity(<math>\geq 30\text{kg/m}^2</math>): RR 1.56 (1.41-1.73)</li> </ul>                                                                                                                                                                                                                                                                                                                              |                                                                                                                                                 |  |
| Singh et al.,2020 (USA)  | Mean 55 years | 2780   | CS | <ul style="list-style-type: none"> <li>○ Liver disease: RR 3.0 (1.5-6.0)</li> </ul>                                                                                                                                                                                                                                                                                                                                                              |                                                                                                                                                 |  |
| Singh et al., 2020 (USA) | Mean 51 years | 196403 | CS |                                                                                                                                                                                                                                                                                                                                                                                                                                                  | <ul style="list-style-type: none"> <li>○ Inflammatory bowel disease: RR 0.93 (0.68-1.27)</li> </ul>                                             |  |
| Smati et al., 2020       |               | 1965   | CS | BMI: <ul style="list-style-type: none"> <li>○ 25-29.9 vs 18.5-24.9 : OR 1.65 (1.05-2.59)</li> </ul>                                                                                                                                                                                                                                                                                                                                              |                                                                                                                                                 |  |

|                        |         |     |    |                                                                                                                                                                                                                                                                                                                                                                                                                                                                                                                                                                                                                                                            |  |  |
|------------------------|---------|-----|----|------------------------------------------------------------------------------------------------------------------------------------------------------------------------------------------------------------------------------------------------------------------------------------------------------------------------------------------------------------------------------------------------------------------------------------------------------------------------------------------------------------------------------------------------------------------------------------------------------------------------------------------------------------|--|--|
|                        |         |     |    | <ul style="list-style-type: none"> <li>○ 30-34.9 Vs 18.5-24.9: OR 1.93 (1.19-3.14)</li> <li>○ ≥35 vs 18.5-24.9: OR 1.98 (1.11-3.52)</li> </ul>                                                                                                                                                                                                                                                                                                                                                                                                                                                                                                             |  |  |
| Smith et al.,2020 (UK) | Mean 67 | 346 | CS | <ul style="list-style-type: none"> <li>○ ≥60 years: RR 4.70 (2.40-9.12)</li> <li>○ Mean age deceased: 73.31</li> <li>○ Mean age Discharged: 63.56</li> <li>○ Male: OR 1.13 (0.72-1.78)</li> <li>○ Smoking: OR 1.22 (0.77-1.90)</li> <li>○ Hypertension: OR 1.72 (1.03-2.87)</li> <li>○ Diabetes: OR 1.96 (1.25-3.08)</li> <li>○ Cardiovascular disease: OR 1.79 (1.14-2.8)</li> <li>○ Neurological Disease: OR 1.28 (0.78-2.09)</li> <li>○ Chronic Kidney Disease: 1.89 (1.14-3.14)</li> <li>○ COPD: OR 2.70 (1.52-4.79)</li> <li>○ Cancer: OR 1.93 (1.06-3.53)</li> <li>○ Asthma: 0.63 (0.32-1.27)</li> <li>○ Hypothyroid: OR 1.68 (0.89-3.18)</li> </ul> |  |  |

|                                 |          |     |    |                                                                                                                                                                                                                                                                                                                                     |                                                                                                                                                                                                                                                                                                                              |                                                                                                                                               |
|---------------------------------|----------|-----|----|-------------------------------------------------------------------------------------------------------------------------------------------------------------------------------------------------------------------------------------------------------------------------------------------------------------------------------------|------------------------------------------------------------------------------------------------------------------------------------------------------------------------------------------------------------------------------------------------------------------------------------------------------------------------------|-----------------------------------------------------------------------------------------------------------------------------------------------|
|                                 |          |     |    | <ul style="list-style-type: none"> <li>Hyperlipidemia: RR 0.75 (0.57-0.98)</li> </ul>                                                                                                                                                                                                                                               |                                                                                                                                                                                                                                                                                                                              |                                                                                                                                               |
| Smith et al.,2020(USA)          | 68 years | 86  | R  |                                                                                                                                                                                                                                                                                                                                     | <ul style="list-style-type: none"> <li>Non Caucasian vs Caucasian: OR 1.58 (0.64-3.90)</li> <li>Former/current smokers vs never smokers: OR 2.87 (1.11-7.38)</li> <li>Current cancer treatment: 0.78 (0.32-1.94)</li> </ul>                                                                                                  |                                                                                                                                               |
| Snipelisky et al.,2020          | 61 years | 156 | CS |                                                                                                                                                                                                                                                                                                                                     |                                                                                                                                                                                                                                                                                                                              | <ul style="list-style-type: none"> <li>Male: OR 2 (0.96-4.19)</li> <li>CKD: OR 1.19 (0.43-3.33)</li> <li>COPD: OR 2.07 (0.62-6.91)</li> </ul> |
| Vee et al.,2020<br>(Malaysia)   | 28 Years | 247 | R  |                                                                                                                                                                                                                                                                                                                                     | <ul style="list-style-type: none"> <li>&gt;=65 years vs &lt;65 years: OR :3.82 (0.74-19.58)</li> <li>COPD: OR 11.74 (1.80-76.54)</li> <li>Diabetes: OR 56 (15.50-202.31)</li> <li>Hypertension: OR 8.79 (2.90-26.65)</li> <li>Cardiovascular disease: OR 20.73 (4.57-94.04)</li> <li>CKD: OR 50.89 (10.94-236.82)</li> </ul> |                                                                                                                                               |
| Soleimani et al.,2020<br>(Iran) |          | 681 | R  | <ul style="list-style-type: none"> <li>Male: OR 0.86 (0.49-1.50)</li> <li>Cardiac disease: OR 1.70 (0.95-3.04)</li> <li>Cerebro vascular disease: OR 21.96 (6.22-77.55)</li> <li>Chronic lung disease: OR 2.5 (1.03-6.09)</li> <li>Chronic kidney disease: OR 1.32 (0.55-3.19)</li> <li>Malignancy: OR 2.84 (0.69-11.71)</li> </ul> | <ul style="list-style-type: none"> <li>Male: OR 0.4 (0.22-0.71)</li> <li>Cardiac disease: OR 1.02 (0.58-1.81)</li> <li>Chronic Lung disease: OR 2.68 (0.77-9.36)</li> <li>Chronic kidney disease: OR 8.9 (3.57-22.48)</li> <li>Malignancy: 0.65 (0.15-2.79)</li> <li>Cerebrovascular disease: OR 2.52 (0.72-8.85)</li> </ul> |                                                                                                                                               |

|                                   |                    |         |    |                                                                                                                                                                                                                    |                                                                                                                                                                                                                                                                                                                                                                                                                  |                                                  |
|-----------------------------------|--------------------|---------|----|--------------------------------------------------------------------------------------------------------------------------------------------------------------------------------------------------------------------|------------------------------------------------------------------------------------------------------------------------------------------------------------------------------------------------------------------------------------------------------------------------------------------------------------------------------------------------------------------------------------------------------------------|--------------------------------------------------|
|                                   |                    |         |    |                                                                                                                                                                                                                    |                                                                                                                                                                                                                                                                                                                                                                                                                  |                                                  |
| Song et al., 2020<br>(China)      | Median<br>52 years | 69      | R  |                                                                                                                                                                                                                    |                                                                                                                                                                                                                                                                                                                                                                                                                  | ○ ≥60 years vs <60 years:<br>OR6.63 (1.22-35.93) |
| Song et al, 2020<br>(China)       | Median<br>39 yaers | 41      | CS |                                                                                                                                                                                                                    | <ul style="list-style-type: none"> <li>○ Age continuous: <ul style="list-style-type: none"> <li>○ Mild: 37 years (29-44)</li> <li>○ Severe: 50 (38-85)</li> </ul> </li> <li>○ Male: OR 1.41 (0.34-5.78)</li> <li>○ Any comorbidity: OR 12.13 (2.31-63.62)</li> <li>○ Hypertension: OR 14 (1.36-143.60)</li> <li>○ Diabetes: OR 2.7 (0.33-21.83)</li> <li>○ Chronic liver disease: OR 5.6 (0.46-68.68)</li> </ul> |                                                  |
| Stachura et al., 2021<br>(Poland) | Mean 59            | 100     | CS |                                                                                                                                                                                                                    | <ul style="list-style-type: none"> <li>○ Age: OR 1.1 (1.01-1.15)</li> <li>○ BMI: OR 1.24 (1.01-1.53)</li> <li>○ Male: 1.07 (0.47-2.41)</li> <li>○ Dyspnea: Ot 7.29 (3.00-17.73)</li> <li>○ Hypertension: OR 2.66 (1.18-5.97)</li> <li>○ Chronic heart failure: OR 14.05 (1.72-114.59)</li> <li>○ Lactate deshydrogenase: OR 1.16 (1.03-1.3)</li> <li>○ Higher D-Dimer: OR 1.73 (1.01-2.9)</li> </ul>             |                                                  |
| Rodrigues et al.,2020<br>(Canada) |                    | 233,566 | CS | ○ Male: OR 1.70 (1.54-1.88)                                                                                                                                                                                        |                                                                                                                                                                                                                                                                                                                                                                                                                  | ○ Male: OR 2.24 (1.91-2.62)                      |
| Stefan et al., 2020<br>(Romania)  | Median<br>64 years | 37      | R  | <ul style="list-style-type: none"> <li>○ Age: 0.93 (0.83-1.04)</li> <li>○ Obesity: OR 1.38 (0.25-7.58)</li> <li>○ Smoking: OR 4.48 (0.54-36.92)</li> <li>○ Coronary heart disease: OR 0.98 (0.05-17.54)</li> </ul> | <ul style="list-style-type: none"> <li>○ Male: OR 0.29 (0.07-1.14)</li> <li>○ Smoking:OR 7.64 (0.76-76.90)</li> <li>○ Hypertension: 1.91 (0.32-11.47)</li> <li>○ Diabetes: OR 1.43 (0.36-5.61)</li> <li>○ Atrial fibrillation: OR 3 (0.67-13.40)</li> <li>○ Cancer: OR 1.5 (0.09-26.01)</li> <li>○ Obesity:OR 2.27 (0.54-9.53)</li> </ul>                                                                        |                                                  |

|                              |                          |     |    |                                                                                                                                                                                                                                                                                              |  |                                                                                                                                                                                                                                                                                                                                                                                                |
|------------------------------|--------------------------|-----|----|----------------------------------------------------------------------------------------------------------------------------------------------------------------------------------------------------------------------------------------------------------------------------------------------|--|------------------------------------------------------------------------------------------------------------------------------------------------------------------------------------------------------------------------------------------------------------------------------------------------------------------------------------------------------------------------------------------------|
|                              |                          |     |    | <ul style="list-style-type: none"> <li>Gender: OR 0.66 (0.12-3.45)</li> <li>Hypertension: OR 0.5 (0.07-3.34)</li> <li>Diabetes: OR 0.69 (0.11-4.18)</li> <li>COPD: OR 11.6 (0.88-158.28)</li> <li>Atrial fibrillation: OR 5.33 (0.93-30.51)</li> <li>Cancer: OR 4.14 (0.22-74.70)</li> </ul> |  |                                                                                                                                                                                                                                                                                                                                                                                                |
| Steinberg et al., 2020 (USA) |                          | 210 | R  | BMI >30: OR 6.01 (2.5-14.48)                                                                                                                                                                                                                                                                 |  |                                                                                                                                                                                                                                                                                                                                                                                                |
| Suleyman et al., 2020(USA)   | Mean 57 Years (SD: 16.8) | 463 | CS |                                                                                                                                                                                                                                                                                              |  | <ul style="list-style-type: none"> <li>Male: OR 2.0 (1.3-3.2)</li> <li>Age&gt;60 years: 1.6 (1.0-2.7)</li> <li>African American race: OR 0.9 (0.5-1.6)</li> <li>Obesity: OR 2.0 (1.4-3.6)</li> <li>CKD: OR 2.0 (1.3-3.3)</li> <li>Cancer: OR 1.9 (1.0-3.9)</li> <li>Diabetes: 1.3 (0.8-2.2)</li> <li>Hypertension: OR 1.0 (0.5-1.8)</li> <li>Coronary artery disease: 1.1 (0.6-2.0)</li> </ul> |
| Sun et al.,2020b (China)     |                          | 244 | R  | <ul style="list-style-type: none"> <li>Age: OR 1.12 (1.01-1.25)</li> <li>Female: 0.32 (0.04-2.41)</li> <li>Hypertension: 0.82 (0.24-2.75)</li> <li>Diabetes: OR 1.18 (0.64-2.20)</li> </ul>                                                                                                  |  |                                                                                                                                                                                                                                                                                                                                                                                                |

|                             |                                    |      |    |                                                                                                                                                          |  |                                                                                                                                                                                                                                                                                                                                                                                                                                                                                                                                                                                                                                                      |
|-----------------------------|------------------------------------|------|----|----------------------------------------------------------------------------------------------------------------------------------------------------------|--|------------------------------------------------------------------------------------------------------------------------------------------------------------------------------------------------------------------------------------------------------------------------------------------------------------------------------------------------------------------------------------------------------------------------------------------------------------------------------------------------------------------------------------------------------------------------------------------------------------------------------------------------------|
|                             |                                    |      |    | <ul style="list-style-type: none"> <li>○ Coronary heart disease: 1.43 (0.69-2.94)</li> <li>○ Previous respiratory diseases: 3.24 (0.45-23.57)</li> </ul> |  |                                                                                                                                                                                                                                                                                                                                                                                                                                                                                                                                                                                                                                                      |
| Suresh et al., 2020         | Median<br>64 years<br>(SD: 17)     | 1983 | R  | <ul style="list-style-type: none"> <li>○ Obesity: OR 1.10 (0.83-1.44)</li> </ul>                                                                         |  | <ul style="list-style-type: none"> <li>○ Obesity: OR 1.37 (1.07-1.76)</li> </ul>                                                                                                                                                                                                                                                                                                                                                                                                                                                                                                                                                                     |
| Swann et al.,2020 (UK)      | Median<br>(4.6 (0.3-13.7)<br>years | 651  | P  |                                                                                                                                                          |  | <ul style="list-style-type: none"> <li>○ Female vs Male: OR 0.82 (0.51-1.31)</li> <li>○ Age group: ref group (15-19 years) <ul style="list-style-type: none"> <li>○ &lt;1 months OR 3.21 (1.36-7.66)</li> <li>○ 1 month-&lt;1 year: OR 0.53 (0.22-1.25)</li> <li>○ 1-4 years: 1.28 (0.57-2.89)</li> <li>○ 5-9 years: 1.33 (0.58-3.05)</li> <li>○ 10-14 years: 3.23 (1.55-6.99)</li> </ul> </li> <li>○ Ethnicity: Ref( White) <ul style="list-style-type: none"> <li>○ Black:OR 2.82 (1.41-5.57)</li> <li>○ South Asian: 1.86 (0.87-3.77)</li> <li>○ Other: OR 1.91 (1.07-3.34)</li> </ul> </li> <li>○ Any comorbidity:OR 1.42 (0.89-2.28)</li> </ul> |
| Szymanski et al.,2021 (USA) |                                    | 4968 | CS | <ul style="list-style-type: none"> <li>○ Blood Group A vs O: HR 1.17 (1.02-1.33)</li> </ul>                                                              |  |                                                                                                                                                                                                                                                                                                                                                                                                                                                                                                                                                                                                                                                      |

|                               |                     |      |   |                                                                                                                                                                                                                                                                                                                                                                                                                                                                                                                                                                                                        |  |  |
|-------------------------------|---------------------|------|---|--------------------------------------------------------------------------------------------------------------------------------------------------------------------------------------------------------------------------------------------------------------------------------------------------------------------------------------------------------------------------------------------------------------------------------------------------------------------------------------------------------------------------------------------------------------------------------------------------------|--|--|
|                               |                     |      |   | <ul style="list-style-type: none"> <li>○ Blood group B vs O: HR 1.32 (1.10-1.58)</li> </ul>                                                                                                                                                                                                                                                                                                                                                                                                                                                                                                            |  |  |
| Talavera et al., 2020 (Spain) | Mean: 67 (SD: 14.7) | 576  | R | <ul style="list-style-type: none"> <li>○ Anosmia: OR 0.180 (0.07–0.47)</li> <li>○ Time from clinical onset</li> <li>○ Age: OR 1.056 (1.03–1.08)</li> <li>○ Female: OR 0.67 (0.391–1.148)</li> <li>○ Hypertension: OR 1.31 (0.76–2.28)</li> <li>○ Diabetes: OR 1.33 (0.76–2.34)</li> <li>○ Smoking: OR 1.71 (0.93–3.12)</li> <li>○ Cardiological disorders: OR 1.20 (0.72–2.02)</li> <li>○ Pulmonary disorders: OR 0.83 (0.48 –1.45)</li> <li>○ Cancer: OR 1.40 (0.76–2.56)</li> <li>○ Immunosuppression: OR 1.30 (0.41–4.14)</li> <li>○ Chronic neurological disorders: OR 1.54 (0.87–2.72)</li> </ul> |  |  |
| Tang et al., 2020 (USA)       | Mean: 74 years      | 1970 | R | <ul style="list-style-type: none"> <li>○ Asthma: OR 0.64 (0.30-1.40)</li> <li>○ COPD/emphysema: OR 1.55 (1.08-2.24)</li> <li>○ Cancer: OR 1.22(0.74, 2.01)</li> </ul>                                                                                                                                                                                                                                                                                                                                                                                                                                  |  |  |



|  |  |  |  |                                                                                                                                                                                                                                                                                                                                                                                                                                                                                                                                                                                                                                                                                 |  |  |
|--|--|--|--|---------------------------------------------------------------------------------------------------------------------------------------------------------------------------------------------------------------------------------------------------------------------------------------------------------------------------------------------------------------------------------------------------------------------------------------------------------------------------------------------------------------------------------------------------------------------------------------------------------------------------------------------------------------------------------|--|--|
|  |  |  |  | <ul style="list-style-type: none"> <li>○ Hypertension:HR 0.78 (0.47-1.27)</li> <li>○ Atrial fibrillation:HR 0.86 (0.57-1.30)</li> <li>○ Coronary heart disease:HR 0.83 (0.58-1.19)</li> <li>○ Heart failure: HR 1.13 (0.79-1.62)</li> <li>○ Diabates: HR 0.87 (0.63-1.21)</li> <li>○ Hypothyroidism: HR 1.06 (0.70-1.61)</li> <li>○ HIV: HR 0.59 (0.08-4.36)</li> <li>○ Chronic hepatitis C: HR 0.94 (0.29-3.02)</li> <li>○ Cerebrovascular disease: HR 0.73 (0.51-1.05)</li> <li>○ Dementia: HR 0.99 (0.69-1.42)</li> <li>○ CKD (stage1-5): HR 1.02 (0.71-1.46)</li> <li>○ End stage kidney disease: HR 1.56 (0.95-2.55)</li> <li>○ Depression: HR 1.08 (0.77-1.50)</li> </ul> |  |  |
|  |  |  |  | ○                                                                                                                                                                                                                                                                                                                                                                                                                                                                                                                                                                                                                                                                               |  |  |

|                          |                 |     |   |  |                                                                                                 |  |
|--------------------------|-----------------|-----|---|--|-------------------------------------------------------------------------------------------------|--|
| Tao et al., 2020 (China) | Median 55 years | 222 | R |  | Anamia 3.47, 1.02-11.75 (aOR)<br>Male 0.83, 0.33-2.13<br>Age $\geq 60$ vs $<60$ 2.66, 1.02-6.96 |  |
|--------------------------|-----------------|-----|---|--|-------------------------------------------------------------------------------------------------|--|

|                                   |                                      |         |    |                                                                                                                                                                                                              |                                                                                                                                          |                                                                                                                                                                                                                                |
|-----------------------------------|--------------------------------------|---------|----|--------------------------------------------------------------------------------------------------------------------------------------------------------------------------------------------------------------|------------------------------------------------------------------------------------------------------------------------------------------|--------------------------------------------------------------------------------------------------------------------------------------------------------------------------------------------------------------------------------|
|                                   | (IQR, 42-66 years)                   |         |    |                                                                                                                                                                                                              | Hypertension 4.44, 1.72-11.48<br>COPD 6.95, 1.53-31.62<br>Cardiovascular diseases 7.44, 2.40-23.1<br>Any comorbidities 12.22, 3.46-43.19 |                                                                                                                                                                                                                                |
| Tatum et al., 2020<br>(USA)       | Mean ± SD (58.7 ± 14.8 years)        | 188     | RC | Male 1.41, 0.57-3.57<br>Coormibidities 0.89, 0.1-8.43                                                                                                                                                        |                                                                                                                                          |                                                                                                                                                                                                                                |
| Tehrani et al., 2021<br>(Swden)   | 20-103 years<br>(mean 66 ± 17 years) | 255     | P  | Kidney 0.92, 0.45–1.92 (aOR)<br>Heart failure, 3.30, 1.54–7.10 (aOR)<br>Ischematic heart disease, 2.82, 1.06–7.51(aOR)<br>Obesity 1.07 0.61–1.87<br>Diabetes 1.35, 0.68–2.66<br>Hypertension 1.37, 0.77–2.46 |                                                                                                                                          |                                                                                                                                                                                                                                |
| Tejpal et al., 2021(??)           | Adults                               | 10,630  | R  | Male 1.37, 1.23–1.52                                                                                                                                                                                         |                                                                                                                                          | Male 1.32, 1.19-1.45                                                                                                                                                                                                           |
| Telle et al., 2021<br>(Norway)    | Adult                                | 8569    | R  | Male 1.7, 1.4–2.1 (aRR)<br>Comorbidity 1.3, 1.1–1.7 (aRR)<br>Risk increases with age                                                                                                                         |                                                                                                                                          | Male 2.8 1.9–4.1 (aRR)<br>Comorbidity 1.1 0.7–1.6 (aRR)<br>Risk increases with age<br><u>Hospitalization:</u><br>Male 1.3 1.2–1.5 (aRR)<br>Comorbidity 1.6 1.4–1.8 (aRR)<br>Risk increases with age                            |
| Temkin-Greener et al., 2020 (USA) | All                                  | 556,792 | R  | The odds having at least one death in states didn't differ by the percent of residents who wrere male, or with asthma, hypertension, COPD, diabetes, obesity, dementia.                                      |                                                                                                                                          |                                                                                                                                                                                                                                |
| Tesoriero et al., 2020<br>(USA)   | Mean ± SD, 54.0 ± 13.3 years         | 2988    | RC |                                                                                                                                                                                                              |                                                                                                                                          | Female 1.12, 0.84-1.50 (rate ratio)<br>Age ≥60 vs 40 years 4.41, 1.63-11.92, (rate ratio)<br><br>Hospitalization:<br>Female 1.01, 0.87-1.16 (adjusted rate ratio)<br>Age ≥60 vs 40 years 3.46, 2.66-4.51 (adjusted rate ratio) |

|                                         |                                           |     |   |                                                                                                                                                                                                          |  |  |
|-----------------------------------------|-------------------------------------------|-----|---|----------------------------------------------------------------------------------------------------------------------------------------------------------------------------------------------------------|--|--|
| Tessitore et al., 2021<br>(Switzerland) | Median<br>(Q1–Q3)=<br>67 (54–81)<br>years | 839 | R | CVD 2.9, 1.7 -5.0<br>Male 1.6, 0.98 - 2.6<br>Hypertension 0.80, 0.48 - 1.3<br>Obesity 0.83, 0.54-1.3<br>Diabetes 1.6, 0.91-2.6<br>Smoking 1.1, 0.31-3.1<br>COPD 2.0, 0.94 - 4.3<br>Anaemia 1.5, 0.90-2.3 |  |  |
|-----------------------------------------|-------------------------------------------|-----|---|----------------------------------------------------------------------------------------------------------------------------------------------------------------------------------------------------------|--|--|

CS= Cross-sectional

ICU=intensive care unit

R=Retrospective

P: Prospective

HR= hazards ratio
