# Supplementary material for: Heterogeneity and Risk of Bias in Studies Examining Risk Factors for Severe Illness and Death in COVID-19: A Systematic Review and Meta-Analysis
Source: MDPI journal article supplement (doi:10.3390/pathogens11050563), 2022-05-10
Supplement: s1 [file s1]

# **Heterogeneity and risk of bias in studies examining risk factors for severe illness and death in COVID-19: a systematic review and meta-analysis**

Abraham Degarege \*, Zaeema Naveed, Josiane Kabayundo, David Brett-Major

**Table S13: Forest plot showing the relationship of smoking with the odds of death among COVID-19 patients**

| <b>Author, year</b>       | <b>OR</b> | <b>LCI</b> | <b>UCI</b> | <b>% Weight</b> |
|---------------------------|-----------|------------|------------|-----------------|
| Alguwaihes et al., 2021   | 1.70      | 0.20       | 20.00      | 0.04            |
| Alser et al., 2021        | 2.76      | 1.50       | 5.17       | 0.80            |
| Amanat et al., 2021       | 2.69      | 1.73       | 4.19       | 1.22            |
| Anantharamna et al., 2020 | 1.15      | 0.76       | 1.73       | 1.89            |
| Angelidi et al., 2021     | 1.26      | 0.23       | 7.01       | 0.32            |
| Aoun et al., 2021         | 1.12      | 0.56       | 2.27       | 1.56            |
| Attauabi et al., 2021     | 1.31      | 0.49       | 4.86       | 0.64            |
| Berenguer et al., 2020    | 1.84      | 1.56       | 2.17       | 2.02            |
| Bhatt et al., 2021        | 0.96      | 0.86       | 1.07       | 2.10            |
| Bielza et al., 2021       | 0.90      | 0.31       | 2.63       | 1.28            |
| Bottio et al., 2021       | 0.85      | 0.19       | 3.84       | 0.81            |
| Brandão et al., 2021      | 1.02      | 0.67       | 1.55       | 1.93            |
| Brenner et al., 2020      | 1.47      | 0.12       | 17.53      | 0.06            |
| Caillard et al., 2020     | 1.25      | 0.56       | 2.82       | 1.30            |
| Caliskan et al., 2020     | 13.01     | 5.05       | 33.48      | 0.02            |
| Cariou et al., 2020       | 1.20      | 0.49       | 2.93       | 1.22            |
| Castelnuovo et al., 2020  | 0.93      | 0.68       | 1.25       | 2.03            |
| Cen et al., 2020          | 0.24      | 0.03       | 1.76       | 1.55            |
| Chand et al., 2020        | 2.03      | 1.15       | 3.57       | 1.23            |
| COVID-ICU group, 2020     | 1.18      | 0.85       | 1.62       | 1.97            |
| Di Cosimo et al., 2021    | 1.68      | 0.74       | 3.70       | 1.02            |
| Du H et al., 2020         | 0.59      | 0.13       | 2.74       | 1.15            |
| Duclos et al., 2021       | 2.71      | 0.64       | 11.52      | 0.14            |
| Ferrari et al., 2020      | 3.40      | 1.30       | 8.60       | 0.28            |
| Galiero et al., 2020      | 1.35      | 0.84       | 2.16       | 1.74            |
| Gu et al., 2020           | 1.67      | 1.06       | 2.20       | 1.82            |
| Guarneri et al., 2021     | 0.75      | 0.29       | 1.91       | 1.60            |
| Gupta et al., 2020        | 1.35      | 1.21       | 3.43       | 1.32            |
| Halvatsiotis et al., 2020 | 1.87      | 0.71       | 4.95       | 0.66            |
| Haq et al., 2020          | 1.79      | 0.88       | 3.62       | 1.10            |
| Hu J et al., 2020         | 1.27      | 0.36       | 4.41       | 0.71            |
| Imam Z et al., 2020       | 1.19      | 0.55       | 2.60       | 1.40            |
| Incerti et al., 2021      | 1.28      | 1.16       | 1.41       | 2.09            |
| Islam et al., 2020        | 0.85      | 0.28       | 2.51       | 1.32            |
| Jimeno et al., 2020       | 2.40      | 0.60       | 9.60       | 0.19            |
| Karahan et al., 2020      | 2.16      | 0.19       | 4.30       | 0.69            |
| Kim E et al., 2021        | 1.40      | 0.61       | 3.17       | 1.17            |
| Kim S et al., 2020        | 1.58      | 0.94       | 2.65       | 1.56            |
| Krishnan et al., 2020     | 1.13      | 0.56       | 2.28       | 1.55            |
| Li K et al., 2020         | 0.96      | 0.11       | 8.63       | 0.22            |
| Lievre et al., 2020       | 2.03      | 1.59       | 2.59       | 1.88            |

|                               |       |      |       |      |
|-------------------------------|-------|------|-------|------|
| Liu D et al., 2020            | 0.98  | 0.55 | 1.75  | 1.80 |
| Liu Y et al., 2020            | 2.93  | 0.72 | 11.94 | 0.13 |
| Llamas et al., 2021           | 1.47  | 0.97 | 2.24  | 1.76 |
| Lohia et al., 2021            | 1.14  | 0.91 | 1.42  | 2.04 |
| Lorente et al., 2021          | 1.61  | 0.16 | 16.08 | 0.07 |
| Louapre et al., 2020          | 0.65  | 0.24 | 1.74  | 1.66 |
| Lu Y et al., 2021             | 0.45  | 0.04 | 5.17  | 0.50 |
| Lucar et al., 2021            | 5.85  | 1.20 | 28.57 | 0.02 |
| Maguire et al., 2020          | 1.06  | 0.57 | 1.98  | 1.70 |
| Mak et al., 2020              | 1.29  | 0.89 | 1.93  | 1.86 |
| Marouf et al., 2021           | 5.07  | 1.71 | 15.07 | 0.09 |
| Mash et al., 2020             | 1.01  | 0.46 | 2.21  | 1.54 |
| Mato et al., 2020             | 1.07  | 0.57 | 1.99  | 1.69 |
| Mayer et al., 2021            | 0.98  | 0.67 | 1.39  | 1.98 |
| Mendes et al., 2020           | 0.93  | 0.52 | 1.65  | 1.83 |
| Molinero et al., 2020         | 0.228 | 0.09 | 0.38  | 2.09 |
| Murthy et al., 2021           | 1.87  | 0.92 | 3.81  | 1.05 |
| Nakamura et al., 2020         | 0.60  | 0.13 | 2.67  | 1.18 |
| Namendys-Silva, 2021          | 0.75  | 0.32 | 1.80  | 1.67 |
| Nepogodiev et al., 2020       | 1.02  | 0.64 | 1.63  | 1.88 |
| Nie et al., 2020              | 1.22  | 0.26 | 5.72  | 0.46 |
| Otero et al., 2021            | 0.53  | 0.16 | 1.81  | 1.59 |
| Ozdemir et al., 2021          | 0.99  | 0.54 | 1.80  | 1.77 |
| Ozturk et al., 2020           | 0.93  | 0.65 | 1.33  | 2.00 |
| Peiro et al., 2021            | 2.43  | 1.11 | 5.33  | 0.67 |
| Pinato et al., 2020           | 1.64  | 0.88 | 3.04  | 1.35 |
| Pongpirul et al., 2020        | 2.02  | 0.88 | 4.63  | 0.78 |
| Quisi et al., 2020            | 4.28  | 2.14 | 8.58  | 0.35 |
| Raimondi et al., 2021         | 2.17  | 1.31 | 3.58  | 1.30 |
| Ramaswamy et al., 2020        | 1.12  | 1.07 | 1.18  | 2.11 |
| Rajter et al., 2021           | 3.94  | 0.71 | 17.32 | 0.06 |
| Rivera-Izquierdo et al., 2020 | 0.57  | 0.16 | 2.07  | 1.46 |
| Singh et al., 2021            | 0.01  | 0.00 | 0.04  | 2.11 |
| Smith et al., 2020            | 1.22  | 0.77 | 1.90  | 1.83 |
| Stefan et al., 2020           | 4.48  | 0.54 | 36.92 | 0.01 |
| Talavera et al., 2020         | 1.71  | 0.93 | 3.12  | 1.33 |
| Tessitore et al. 2021         | 1.10  | 0.31 | 3.10  | 1.08 |
| Webb et al., 2020             | 0.95  | 0.03 | 29.82 | 0.02 |
| Yang C et al., 2021           | 1.89  | 0.74 | 4.87  | 0.69 |
| Yao et al., 2021              | 1.22  | 0.12 | 12.34 | 0.11 |
| Yarza et al., 2020            | 2.48  | 0.50 | 12.54 | 0.11 |
| Zhang N et al., 2020          | 0.66  | 0.19 | 2.30  | 1.37 |
| Zhou S et al., 2020           | 3.76  | 1.47 | 9.63  | 0.23 |
| Zhou W et al., 2021           | 2.15  | 0.77 | 5.99  | 0.49 |
| Zou X et al., 2020            | 1.77  | 0.56 | 5.57  | 0.52 |

|                                           |             |             |             |               |
|-------------------------------------------|-------------|-------------|-------------|---------------|
| <b>Total (I squared=96.6%, p&lt;0.01)</b> | <b>1.22</b> | <b>1.01</b> | <b>1.43</b> | <b>100.00</b> |
|-------------------------------------------|-------------|-------------|-------------|---------------|
