# Supplementary material for: Heterogeneity and Risk of Bias in Studies Examining Risk Factors for Severe Illness and Death in COVID-19: A Systematic Review and Meta-Analysis
Source: MDPI journal article supplement (doi:10.3390/pathogens11050563), 2022-05-10
Supplement: s1 [file s1]

# **Heterogeneity and risk of bias in studies examining risk factors for severe illness and death in COVID-19: a systematic review and meta-analysis**

Abraham Degarege \*, Zaeema Naveed, Josiane Kabayundo, David Brett-Major

**Table S12: Forest plot showing the relationship of chronic kidney disease with the odds of death among COVID-19 patients**

| <b>Author, year</b>          | <b>OR</b> | <b>LCI</b> | <b>UCI</b> | <b>% Weight</b> |
|------------------------------|-----------|------------|------------|-----------------|
| Acar et al., 2020            | 5.56      | 2.53       | 12.21      | 0.14            |
| Akhtar et al., 2021          | 0.77      | 0.42       | 1.42       | 2.08            |
| Albalawi et al., 2021        | 0.80      | 0.21       | 3.06       | 1.01            |
| Alguwaihes et al., 2021      | 3.50      | 1.40       | 8.70       | 0.24            |
| Anaklı et al., 2021          | 1.54      | 0.37       | 6.34       | 0.34            |
| Alser et al., 2021           | 2.17      | 0.66       | 9.83       | 0.16            |
| Atkins et al., 2020          | 0.88      | 0.35       | 2.24       | 1.51            |
| Attauabi et al., 2021        | 3.63      | 0.76       | 13.36      | 0.09            |
| Auld et al., 2020            | 2.68      | 1.39       | 5.17       | 0.70            |
| Baggio et al., 2021          | 2.55      | 1.73       | 3.75       | 1.43            |
| Baqui et al., 2020           | 3.74      | 2.97       | 4.73       | 1.59            |
| Barbui et al., 2021          | 3.22      | 1.22       | 8.49       | 0.24            |
| Bartoletti et al., 2020      | 0.75      | 0.28       | 2.01       | 1.61            |
| Becerra-Munoz et al., 2021   | 3.36      | 1.00       | 11.33      | 0.12            |
| Berenguer et al., 2020       | 3.68      | 2.76       | 4.92       | 1.35            |
| Bertsimas et al., 2020       | 2.48      | 1.55       | 3.98       | 1.21            |
| Betech et al., 2020          | 2.00      | 1.84       | 2.17       | 2.40            |
| Bhatt et al., 2021           | 1.45      | 1.29       | 1.62       | 2.40            |
| Bielza et al., 2021          | 1.39      | 0.84       | 2.32       | 1.77            |
| Botta et al., 2021           | 0.89      | 0.30       | 2.61       | 1.27            |
| Caliskan et al., 2020        | 3.98      | 0.93       | 16.89      | 0.05            |
| Capdevila-Reniu et al., 2021 | 1.40      | 0.67       | 2.93       | 1.29            |
| Catteau et al., 2020         | 2.46      | 2.16       | 2.81       | 2.28            |
| Cen et al., 2020             | 3.86      | 0.83       | 17.85      | 0.05            |
| Chand et al., 2020           | 1.21      | 0.61       | 2.37       | 1.59            |
| Chang et al., 2020           | 0.40      | 0.11       | 1.53       | 1.81            |
| Chen et al., 2021            | 2.85      | 1.42       | 5.73       | 0.58            |
| Chen L et al., 2020          | 2.65      | 0.96       | 7.28       | 0.31            |
| Chen Y et al., 2020          | 13.91     | 7.23       | 26.8       | 0.04            |
| Chilimuri et al., 2020       | 1.33      | 0.63       | 2.77       | 1.36            |
| Choron et al., 2021          | 0.59      | 0.17       | 1.99       | 1.55            |
| Ciceri et al., 2020          | 4.29      | 2.29       | 8.04       | 0.36            |
| Cinar et al., 2021           | 7.34      | 2.17       | 28.84      | 0.02            |
| Covino et al., 2020          | 4.89      | 1.21       | 19.69      | 0.04            |
| De Souza et al., 2020        | 2.02      | 1.27       | 3.20       | 1.48            |
| De Souza et al., 2021        | 1.14      | 0.41       | 3.19       | 1.04            |
| Du et al., 2020              | 4.21      | 1.65       | 10.72      | 0.16            |
| Elhadi et al., 2021          | 1.51      | 0.78       | 2.91       | 1.37            |
| Falcone et al., 2020         | 3.76      | 1.67       | 8.44       | 0.27            |
| Ferrando et al., 2020        | 0.91      | 0.22       | 3.69       | 0.79            |
| Fox et al., 2020             | 1.44      | 0.61       | 3.40       | 1.04            |
| Foy et al., 2020             | 13.96     | 6.12       | 31.88      | 0.02            |

|                             |       |      |       |      |
|-----------------------------|-------|------|-------|------|
| Frontera et al., 2020       | 0.82  | 0.44 | 1.53  | 2.03 |
| Galiero et al., 2020        | 1.01  | 0.44 | 2.34  | 1.50 |
| Giannoglou et al., 2020     | 6.15  | 2.73 | 13.82 | 0.11 |
| Grasselli et al., 2020      | 4.89  | 2.83 | 8.44  | 0.38 |
| Guan et al., 2020           | 10.58 | 3.71 | 30.15 | 0.02 |
| Gupta et al., 2020          | 1.75  | 1.36 | 2.26  | 2.14 |
| Haase et al., 2020          | 1.95  | 0.98 | 3.86  | 1.00 |
| Halvatsiotis et al., 2020   | 8.21  | 0.81 | 83.03 | 0.00 |
| Haq et al., 2020            | 5.04  | 0.45 | 56.85 | 0.00 |
| Hatami et al., 2021         | 1.07  | 0.51 | 2.28  | 1.58 |
| Hwang et al., 2020          | 0.58  | 0.15 | 2.23  | 1.39 |
| Iaccarino et al., 2020      | 1.58  | 0.14 | 2.43  | 1.28 |
| Iaccarino et al., 2020      | 4.74  | 2.97 | 7.59  | 0.52 |
| Imam Z et al., 2020         | 1.86  | 1.30 | 2.64  | 1.86 |
| Incerti et al., 2021        | 3.09  | 2.81 | 3.42  | 2.30 |
| Inciardi et al., 2020       | 6.44  | 1.74 | 23.84 | 0.03 |
| Jung et al., 2020           | 2.35  | 1.25 | 4.40  | 0.90 |
| Kaeuffer et al., 2020       | 2.30  | 1.30 | 3.90  | 1.12 |
| Karahan et al., 2020        | 3.22  | 1.35 | 7.66  | 0.31 |
| Kim E et al., 2021          | 4.10  | 1.03 | 16.41 | 0.06 |
| Kim S et al., 2020          | 8.30  | 4.14 | 16.62 | 0.09 |
| Krishnan et al., 2020       | 0.93  | 0.37 | 2.34  | 1.46 |
| Laake et al., 2020          | 4.18  | 1.82 | 9.58  | 0.21 |
| Liu et al., 2020            | 0.46  | 0.11 | 1.98  | 1.52 |
| Llamas et al., 2021         | 4.13  | 2.22 | 7.69  | 0.39 |
| Lucar et al., 2021          | 3.11  | 0.62 | 15.43 | 0.06 |
| Lunski et al., 2021         | 3.84  | 2.98 | 4.93  | 1.47 |
| Maguire et al., 2020        | 2.04  | 0.88 | 4.74  | 0.68 |
| Martinez-Lopez et al., 2020 | 4.60  | 1.90 | 11.30 | 0.15 |
| Martins et al., 2021        | 2.67  | 0.39 | 18.17 | 0.04 |
| Mash et al., 2020           | 5.16  | 2.82 | 9.43  | 0.28 |
| Mather et al., 2020         | 2.50  | 1.60 | 3.93  | 1.26 |
| Mato et al., 2020           | 2.02  | 0.95 | 4.30  | 0.83 |
| Mehta et al., 2021          | 1.24  | 1.20 | 1.29  | 2.44 |
| Mendes et al., 2020         | 1.10  | 0.59 | 2.03  | 1.80 |
| Molinero et al., 2020       | 4.64  | 2.57 | 8.34  | 0.36 |
| Mostaza et al., 2020        | 0.80  | 0.45 | 1.22  | 2.22 |
| Murthy et al., 2021         | 2.11  | 1.34 | 3.32  | 1.45 |
| Nachega et al., 2020        | 10.43 | 2.30 | 47.31 | 0.01 |
| Namendys-Silva, 2021        | 0.45  | 0.08 | 2.54  | 1.19 |
| Nepogodiev et al., 2020     | 1.74  | 1.21 | 2.49  | 1.90 |
| Nikpouraghdam et al., 2020  | 2.29  | 0.66 | 7.98  | 0.24 |
| Okoh et al., 2020           | 3.43  | 1.78 | 6.80  | 0.45 |
| Ozdemir et al., 2021        | 6.39  | 2.35 | 12.57 | 0.13 |
| Park et al., 2020           | 2.19  | 0.85 | 5.63  | 0.49 |

|                                           |             |             |             |               |
|-------------------------------------------|-------------|-------------|-------------|---------------|
| Park et al., 2020                         | 0.69        | 0.14        | 3.25        | 0.91          |
| Parlak et al., 2021                       | 34.83       | 4.11        | 295.58      | 0.00          |
| Passamonti et al., 2020                   | 2.45        | 1.30        | 4.64        | 0.83          |
| Patel et al., 2020                        | 2.29        | 1.30        | 4.01        | 1.07          |
| Peiro et al., 2021                        | 8.07        | 3.18        | 20.46       | 0.05          |
| Pepe et al., 2021                         | 2.47        | 1.78        | 3.42        | 1.67          |
| Pineiro et al., 2021                      | 6.86        | 0.76        | 61.67       | 0.00          |
| Qin W et al., 2021                        | 5.33        | 1.25        | 22.72       | 0.03          |
| Raimondi et al., 2021                     | 2.56        | 1.22        | 5.36        | 0.61          |
| Recinella et al., 2020                    | 0.78        | 0.30        | 2.03        | 1.61          |
| Rodriguez et al., 2020                    | 3.00        | 0.17        | 53.05       | 0.01          |
| Rokni et al., 2020                        | 2.96        | 0.74        | 11.87       | 0.11          |
| Rossi et al., 2020                        | 2.76        | 1.73        | 4.41        | 1.09          |
| Rottoli et al., 2020                      | 2.35        | 0.90        | 6.17        | 0.42          |
| Russo et al., 2020                        | 2.46        | 1.41        | 4.29        | 1.00          |
| Sai et al., 2021                          | 0.09        | 0.01        | 0.78        | 2.22          |
| Saifi et al., 2021                        | 0.45        | 0.11        | 1.85        | 1.60          |
| Sands et al., 2020                        | 0.96        | 0.71        | 1.29        | 2.31          |
| Smith et al., 2020                        | 1.89        | 1.14        | 2.80        | 1.65          |
| Wang et al., 2020                         | 1.93        | 0.57        | 6.47        | 0.35          |
| Xu B. et al., 2020                        | 2.98        | 0.52        | 17.11       | 0.05          |
| Xu Peng et al., 2020                      | 10.88       | 2.60        | 45.63       | 0.01          |
| Y.Wang et al., 2020                       | 0.49        | 0.11        | 2.24        | 1.37          |
| Yarza et al., 2020                        | 2.39        | 0.29        | 19.85       | 0.04          |
| Yildirim et al., 2021                     | 0.14        | 0.00        | 80.73       | 0.00          |
| Zhang Nan et al., 2020                    | 3.16        | 0.27        | 37.27       | 0.01          |
| Zhao Y et al., 2020                       | 10.39       | 2.07        | 52.13       | 0.01          |
| Zhou S et al., 2020                       | 10.22       | 1.04        | 100.51      | 0.00          |
| Zhou Wei et al., 2021                     | 0.66        | 0.11        | 4.04        | 0.66          |
| Zhu Y et al., 2021                        | 1.42        | 0.77        | 2.61        | 1.54          |
| <b>Total (I squared=79.3%, p&lt;0.01)</b> | <b>1.73</b> | <b>1.54</b> | <b>1.92</b> | <b>100.00</b> |
