# Supplementary material for: Heterogeneity and Risk of Bias in Studies Examining Risk Factors for Severe Illness and Death in COVID-19: A Systematic Review and Meta-Analysis
Source: MDPI journal article supplement (doi:10.3390/pathogens11050563), 2022-05-10
Supplement: s1 [file s1]

# **Heterogeneity and risk of bias in studies examining risk factors for severe illness and death in COVID-19: a systematic review and meta-analysis**

Abraham Degarege \*, Zaeema Naveed, Josiane Kabayundo, David Brett-Major

**Table S4: Forest plot showing the relationship of hypertension with the odds of death among COVID-19 patients**

| <b>Author, year</b>          | <b>OR</b> | <b>LCI</b> | <b>UCI</b> |
|------------------------------|-----------|------------|------------|
| Acar et al., 2020            | 2.16      | 1.31       | 3.57       |
| Aishwarya et al., 2020       | 0.61      | 0.09       | 3.71       |
| Akhtar et al., 2021          | 1.2       | 0.75       | 1.93       |
| Albani et al., 2020          | 0.89      | 0.69       | 1.15       |
| Alberici et al., 2020        | 0.27      | 0.05       | 1.31       |
| Alguwaihes et al., 2021      | 1         | 0.4        | 2.6        |
| Allameh et al., 2020         | 1.26      | 0.77       | 2.06       |
| Almaghlouth et al., 2020     | 0.68      | 0.14       | 3.32       |
| Alser et al., 2021           | 2.25      | 1.22       | 4.17       |
| Anaklı et al., 2021          | 1.77      | 0.84       | 3.73       |
| Anantharamna et al., 2020    | 1.71      | 1.13       | 2.6        |
| Angelidi et al., 2021        | 0.84      | 0.15       | 1.04       |
| Aoun et al., 2021            | 1.65      | 0.6        | 4.55       |
| Atkins et al., 2020          | 1.42      | 0.96       | 2.11       |
| Attauabi et al., 2021        | 0.75      | 0.22       | 2.37       |
| Auld et al., 2020            | 1.15      | 0.62       | 2.13       |
| Azar et al., 2020            | 3.26      | 1.83       | 5.78       |
| Baggio et al., 2021          | 1.75      | 1.43       | 2.14       |
| Barbui et al., 2021          | 1.67      | 0.83       | 3.33       |
| Bartoletti et al., 2020      | 1.66      | 0.93       | 2.96       |
| Bhatt et al., 2021           | 0.99      | 0.86       | 1.14       |
| Bielza et al., 2021          | 1.1       | 0.79       | 1.53       |
| Bossini et al., 2020         | 0.38      | 0.08       | 1.3        |
| Botta et al., 2021           | 1.16      | 0.72       | 1.88       |
| Bottio et al., 2021          | 0.67      | 0.18       | 2.4        |
| Brandão et al., 2021         | 1.13      | 0.77       | 1.66       |
| Brouns et al., 2020          | 0.54      | 0.22       | 1.37       |
| Cabezudo-García et al., 2020 | 2.96      | 1.56       | 5.62       |
| Caillard et al., 2020        | 1.66      | 0.99       | 2.79       |
| Caliskan et al., 2020        | 1.45      | 0.69       | 3.07       |
| Capdevila-Reniu et al., 2021 | 0.86      | 0.4        | 1.83       |
| Cariou et al., 2020          | 1.82      | 1.11       | 2.8        |
| Castelnuovo et al., 2020     | 2.38      | 2          | 2.84       |
| Cen et al., 2020             | 2.48      | 1.34       | 4.59       |
| Chand et al., 2020           | 1.86      | 1.15       | 3.03       |
| Chang et al., 2020           | 1.89      | 0.78       | 4.58       |
| Chen et al., 2021            | 1.98      | 1.43       | 2.75       |
| Chen et al., 2021            | 1.14      | 0.87       | 1.5        |

|                           |      |      |       |
|---------------------------|------|------|-------|
| Chen L et al., 2020       | 3    | 1.81 | 4.96  |
| Chen T et al., 2020       | 1.8  | 0.57 | 5.61  |
| Chen Y et al., 2020       | 3.48 | 2.24 | 5.4   |
| Chilimuri et al.,2020     | 1.46 | 0.82 | 2.62  |
| Choron et al., 2021       | 1.04 | 0.45 | 2.36  |
| Choudhuri et al., 2020    | 1.03 | 0.72 | 1.47  |
| Ciceri et al., 2020       | 2.77 | 1.71 | 4.52  |
| COVID-ICU group, 2020     | 1.49 | 1.31 | 1.71  |
| Covino et al., 2020       | 0.37 | 0.13 | 1.04  |
| Covino et al., 2020       | 2.84 | 1.23 | 6.57  |
| Covino et al., 2021       | 1.65 | 0.81 | 3.36  |
| Dagher et al., 2021       | 1.36 | 0.55 | 3.37  |
| De Souza et al., 2020     | 1.53 | 1.2  | 1.94  |
| De Souza et al., 2021     | 4.06 | 2.41 | 6.84  |
| Deeb et al., 2021         | 2.42 | 1.58 | 3.71  |
| Deng et al., 2020         | 3.04 | 2.56 | 3.62  |
| Du et al., 2020           | 4.08 | 1.58 | 10.5  |
| Du H et al., 2020         | 2    | 0.88 | 4.53  |
| Duclos et al, 2021        | 2.5  | 0.66 | 9.51  |
| Elhadi et al., 2021       | 1.02 | 0.7  | 1.48  |
| Falcone et al., 2020      | 2.41 | 1.39 | 4.17  |
| Ferrando et al., 2020     | 1.5  | 1.07 | 2.09  |
| Ferrari et al., 2020      | 1.79 | 0.84 | 3.83  |
| Fox et al., 2020          | 0.52 | 0.13 | 2.02  |
| Foy et al., 2020          | 8.75 | 5.09 | 15.03 |
| Frontera et al., 2020     | 0.7  | 0.47 | 1.04  |
| Galiero et al., 2020      | 1.3  | 0.89 | 1.89  |
| Gao et al., 2020          | 3.79 | 2.21 | 6.53  |
| Genet et al., 2020        | 0.91 | 0.49 | 1.65  |
| Giannoglou et al., 2020   | 3.6  | 2.21 | 5.88  |
| Goodall et al., 2020      | 1.88 | 1.45 | 2.46  |
| Grasselli et al., 2020    | 2.24 | 1.7  | 2.95  |
| Grasselli et al., 2020    | 2.02 | 1.78 | 2.3   |
| Guan et al., 2020         | 6.86 | 3.85 | 12.19 |
| Guarneri et al., 2021     | 1.68 | 0.88 | 3.21  |
| Gupta et al., 2020        | 1.06 | 0.81 | 1.36  |
| Haase et al., 2020        | 1.53 | 0.96 | 2.41  |
| Halvatsiotis et al., 2020 | 0.81 | 0.32 | 2.01  |
| Haq et al., 2020          | 7.38 | 3.44 | 15.85 |
| Hashemi et al., 2020      | 2.2  | 0.88 | 5.52  |
| Hatami et al., 2021       | 1.9  | 1.26 | 2.85  |
| Hendra et al., 2021       | 3.58 | 0.57 | 22.69 |
| Hu et al.,2020            | 1.34 | 0.45 | 3.96  |
| Hu J et al., 2020         | 1.05 | 0.55 | 2     |
| Huang S et al., 2020      | 1.26 | 0.68 | 2.33  |

|                             |      |      |       |
|-----------------------------|------|------|-------|
| Huang Y et al., 2020        | 3.73 | 1.24 | 11.18 |
| Hwang et al., 2020          | 1.74 | 0.69 | 4.39  |
| Iaccarino et al., 2020      | 1.31 | 1.04 | 1.66  |
| Iaccarino et al., 2020      | 2.42 | 1.73 | 3.4   |
| Imam Z et al., 2020         | 1.43 | 1.05 | 1.95  |
| Incerti et al., 2021        | 2.76 | 2.48 | 3.07  |
| Inciardi et al., 2020       | 0.56 | 0.16 | 2.01  |
| Islam et al., 2020          | 3.53 | 1.53 | 8.16  |
| Jiang Y et al., 2020        | 3.21 | 1.21 | 8.51  |
| Jimeno et al., 2020         | 1.9  | 1.1  | 2.5   |
| Jung et al., 2020           | 1.02 | 0.64 | 1.61  |
| Kaeuffer et al., 2020       | 0.6  | 0.3  | 0.9   |
| Kim E et al., 2021          | 1.08 | 0.51 | 2.2   |
| Kim et al., 2020            | 1.32 | 0.88 | 1.99  |
| Kim S et al., 2020          | 2.16 | 1.09 | 4.43  |
| Krause et al., 2020         | 1.97 | 0.45 | 8.7   |
| Krishnamoorthy et al., 2021 | 0.7  | 0.4  | 1.2   |
| Krishnan et al., 2020       | 2.56 | 1.23 | 5.31  |
| Kunal et al., 2020          | 2.94 | 1.24 | 7.91  |
| Kute et al., 2021           | 1.16 | 0.54 | 2.52  |
| Lee L et al., 2020          | 1.95 | 1.36 | 2.8   |
| Li et al., 2021             | 3.74 | 2.45 | 5.72  |
| Li G et al., 2021           | 1.6  | 0.71 | 3.63  |
| Li K et al., 2020           | 2.3  | 0.75 | 7.03  |
| Lievre et al., 2020         | 1.78 | 1.39 | 2.27  |
| Lim et al., 2021            | 3.69 | 1.5  | 9.08  |
| Ling et al., 2020           | 1.25 | 0.85 | 1.83  |
| Liu et al., 2020            | 3.94 | 1.82 | 8.53  |
| Liu et al., 2020            | 0.58 | 0.27 | 1.26  |
| Llamas et al., 2021         | 2.89 | 1.87 | 4.46  |
| Lorente et al., 2021        | 1.21 | 0.91 | 2.88  |
| Lu Y et al., 2021           | 1.12 | 0.44 | 2.89  |
| Lucar et al., 2021          | 0.42 | 0.09 | 1.92  |
| Lunski et al., 2021         | 0.6  | 0.47 | 0.78  |
| Maguire et al., 2020        | 2.02 | 1.08 | 3.78  |
| Martinez-Lopez et al., 2020 | 1.7  | 0.8  | 3.5   |
| Martins et al., 2021        | 3.6  | 0.7  | 18.46 |
| Mash et al., 2020           | 3.95 | 2.73 | 5.7   |
| Mato et al., 2020           | 1.35 | 0.75 | 2.45  |
| Matsuzawa et al., 2020      | 0.63 | 0.15 | 2.34  |
| Mayer et al., 2021          | 1.16 | 0.98 | 1.37  |
| Menager et al., 2021        | 1.17 | 0.27 | 5.08  |
| Mendes et al., 2020         | 1.18 | 0.64 | 2.17  |
| Moghaddam et al., 2020      | 1.0  | 0.15 | 6.53  |
| Molinero et al., 2020       | 5.64 | 3.13 | 10.87 |

|                              |      |      |       |
|------------------------------|------|------|-------|
| Morrison et al., 2020        | 0.79 | 0.29 | 2.13  |
| Mostaza et al., 2020         | 0.69 | 0.44 | 1.08  |
| Murthy et al., 2021          | 1.92 | 1.36 | 2.72  |
| Nachega et al., 2020         | 3.15 | 2.04 | 4.85  |
| Nakamura et al., 2020        | 2.4  | 0.54 | 10.69 |
| Namendys-Silva., 2021        | 2.41 | 1.26 | 4.62  |
| Nepogodiev et al., 2020      | 1.73 | 1.31 | 2.29  |
| Ng et al., 2020              | 0.84 | 0.73 | 0.98  |
| Nie et al., 2020             | 5.69 | 1.32 | 24.54 |
| Nikpouraghdam et al., 2020   | 1.81 | 0.85 | 3.87  |
| Okoh et al., 2020            | 2.21 | 1.23 | 4.04  |
| Otero et al., 2021           | 4.82 | 1.02 | 22.75 |
| Oto et al., 2021             | 1.15 | 0.29 | 4.51  |
| Ozdemir et al., 2021         | 3.02 | 1.67 | 5.45  |
| Ozturk ey al., 2020          | 2.56 | 1.75 | 3.76  |
| Pascual et al., 2020         | 0.83 | 0.05 | 15.09 |
| Park et al., 2020            | 1.48 | 0.91 | 2.4   |
| Park et al., 2020b           | 1.36 | 0.79 | 2.33  |
| Parlak et al., 2021          | 0.82 | 0.23 | 2.98  |
| Patel et al., 2020           | 1.54 | 1.02 | 2.32  |
| Peiro et al., 2021           | 2.81 | 1.33 | 5.93  |
| Pineiro et al., 2021         | 1.85 | 0.6  | 5.66  |
| Plotnikow et al., 2020       | 1.58 | 0.27 | 9.31  |
| Pongpirul et al., 2020       | 5.44 | 2.3  | 12.83 |
| Qin W et al., 2021           | 2.13 | 0.9  | 5.03  |
| Qin W et al., 2021           | 2.03 | 1.26 | 3.27  |
| Raimondi et al., 2021        | 3.09 | 2    | 4.78  |
| Ramaswamy et al., 2020       | 1.26 | 0.35 | 4.59  |
| Ramos-Rincon et al., 2020    | 0.96 | 0.81 | 1.14  |
| Rastad et al., 2021          | 1.12 | 0.43 | 2.89  |
| Rajter et al., 2021          | 0.72 | 0.17 | 3.08  |
| Rivera-Izquierdo et al.,2020 | 5.25 | 2.69 | 10.26 |
| Rodriguez et al., 2020       | 3.0  | 0.67 | 13.53 |
| Rokni et al., 2020           | 1.94 | 0.76 | 4.97  |
| Rosenthal et al., 2020       | 1.08 | 0.99 | 1.18  |
| Rottoli et al., 2020         | 1.09 | 0.56 | 2.15  |
| Russo et al., 2020           | 1.34 | 0.82 | 2.19  |
| Saeed et al., 2020           | 0.89 | 0.68 | 1.16  |
| Sai et al., 2021             | 0.68 | 0.2  | 2.33  |
| Saifi et al., 2021           | 0.87 | 0.15 | 5.06  |
| Salazer et al., 2021         | 1.69 | 1.46 | 1.95  |
| Sands et al., 2020           | 0.63 | 0.48 | 0.82  |
| Santos et al., 2020          | 9    | 1    | 80.8  |
| Shahriarirad et al., 2020    | 1.2  | 0.23 | 6.22  |
| Shi et al.,2020              | 1.58 | 0.57 | 4.37  |

|                                           |             |             |             |
|-------------------------------------------|-------------|-------------|-------------|
| Smith et al.,2020                         | 1.72        | 1.03        | 2.87        |
| Stefan et al., 2020                       | 0.5         | 0.07        | 3.34        |
| Sun et al.,2020                           | 0.82        | 0.24        | 2.75        |
| Talavera et al., 2020                     | 1.31        | 0.76        | 2.28        |
| Tedeschi et al., 2020                     | 4.31        | 2.91        | 6.39        |
| Tehrani et al., 2021                      | 1.37        | 0.77        | 2.46        |
| Tessitore et al., 2021                    | 0.8         | 0.48        | 1.3         |
| Cao et al., 2020                          | 7.33        | 2.37        | 22.65       |
| Turgutalp et al., 2021                    | 0.81        | 0.48        | 1.37        |
| Venturini et al., 2021                    | 1.66        | 0.77        | 3.61        |
| Vrillon et al., 2021                      | 1.19        | 0.4         | 3.54        |
| Vu et al., 2020                           | 9           | 1.05        | 77.29       |
| Wang et al., 2020                         | 5           | 1.74        | 14.3        |
| Wang et al.,2020                          | 1.53        | 0.89        | 2.64        |
| Wang J et al., 2020                       | 1.65        | 0.7         | 3.89        |
| Wargny et al., 2021                       | 0.84        | 0.51        | 1.39        |
| Webb et al., 2020                         | 1.03        | 0.34        | 3.09        |
| Xu Jingyuan et al., 2020                  | 2.02        | 1.16        | 3.54        |
| Xu Jiqian et al., 2020                    | 0.96        | 0.57        | 1.67        |
| Xu Peng et al., 2020                      | 6.4         | 3.12        | 13.11       |
| Yan et al., 2020                          | 4.81        | 2.48        | 9.35        |
| Yang C. et al., 2021                      | 3.8         | 2.09        | 6.93        |
| Yang et al., 2020                         | 1.68        | 0.67        | 4.21        |
| Yang G. et al., 2020                      | 1.68        | 0.67        | 4.21        |
| Yang K. et al., 2020                      | 0.74        | 0.34        | 1.59        |
| Yao et al., 2020                          | 13.53       | 3.55        | 51.5        |
| Yao et al., 2021                          | 2           | 0.75        | 5.3         |
| Yarza et al., 2020                        | 2           | 0.68        | 5.88        |
| Yildirim et al., 2021                     | 1.15        | 0           | 80.73       |
| Zhang et al., 2020                        | 2.17        | 0.38        | 12.46       |
| Zhao Y. et al., 2020                      | 4.24        | 2.76        | 6.51        |
| Zhou S. et al., 2020                      | 2.96        | 1.56        | 5.61        |
| Zhou W et al., 2021                       | 2.36        | 1.17        | 4.78        |
| Zhu Y. et al., 2021                       | 1.41        | 0.92        | 2.16        |
| Zou X. et al., 2020                       | 1.98        | 0.97        | 4.03        |
| Zuo P. et al., 2020                       | 0.98        | 0.97        | 0.99        |
| <b>Total (I squared=77.3%, p&lt;0.01)</b> | <b>1.38</b> | <b>1.30</b> | <b>1.46</b> |
