# Supplementary material for: Heterogeneity and Risk of Bias in Studies Examining Risk Factors for Severe Illness and Death in COVID-19: A Systematic Review and Meta-Analysis
Source: MDPI journal article supplement (doi:10.3390/pathogens11050563), 2022-05-10
Supplement: s1 [file s1]

# Heterogeneity and risk of bias in studies examining risk factors for severe illness and death in COVID-

## 19: a systematic review and meta-analysis

Abraham Degarege \*, Zaeema Naveed, Josiane Kabayundo, David Brett-Major

Table S21: Meta-regression analysis examining factors affecting the odds ratio of death among COVID-19 patients with comorbidities at the study level

|                                    | Hypertension   | Cancer        | Diabetes      | Cardiovascular disease | Chronic respiratory disease | Chronic kidney disease | Smoking       | Gender         | Age ≥60 vs <60 years | Age ≥65 vs <65 years | Age continuous |
|------------------------------------|----------------|---------------|---------------|------------------------|-----------------------------|------------------------|---------------|----------------|----------------------|----------------------|----------------|
| Study area (β & p-value)           | 0.0003 (0.944) | 0.002 (0.873) | 0.01 (0.009)  | -0.001 (0.890)         | -0.01 (0.183)               | -0.003 (0.733)         | 0.001 (0.821) | -0.007 (0.024) | 0.01 (0.360)         | 0.001 (0.911)        | 0.001 (0.257)  |
| Study design (β & p-value)         | 0.01 (0.831)   | -0.02 (0.877) | -0.02 (0.877) | 0.09 (0.272)           | 0.07 (0.412)                | -0.01 (0.918)          | 0.08 (0.409)  | 0.06 (0.108)   | -0.10 (0.519)        | 0.29 (0.147)         | -0.005 (0.730) |
| Sample size (β & p-value)          | -0.04 (0.228)  | -0.04 (0.245) | 0.02 (0.349)  | -0.03 (0.392)          | -0.03 (0.440)               | 0.03 (0.490)           | -0.05 (0.250) | 0.003 (0.809)  | 0.128 (0.028)        | 0.04 (0.497)         | 0.001 (0.888)  |
| Year of publication (β & p-value ) | -0.15 (0.089)  | -0.03 (0.835) | -0.18 (0.024) | -0.26 (0.059)          | -0.28 (0.015)               | -0.19 (0.234)          | 0.06 (0.585)  | -0.03 (0.635)  | 0.08 (0.705)         | -0.18 (0.559)        | -0.006 (0.735) |
