# Supplementary material for: Heterogeneity and Risk of Bias in Studies Examining Risk Factors for Severe Illness and Death in COVID-19: A Systematic Review and Meta-Analysis
Source: MDPI journal article supplement (doi:10.3390/pathogens11050563), 2022-05-10
Supplement: s1 [file s1]

# Heterogeneity and risk of bias in studies examining risk factors for severe illness and death in COVID-19: a systematic review and meta-analysis

Abraham Degarege \*, Zaeema Naveed, Josiane Kabayundo, David Brett-Major

**Table S14: Forest plot showing the relationship of age with the odds of death among COVID-19 patients**

| Author, year                      | OR    | LCI  | UCI   | % Weight |
|-----------------------------------|-------|------|-------|----------|
| <b>Age in years ≥60 vs &lt;60</b> |       |      |       |          |
| Alahmari et al., 2021             | 9.18  | 8.4  | 10.03 | 3.10     |
| Alguwaihes et al., 2021           | 1.4   | 0.63 | 3.1   | 3.01     |
| Allameh et al., 2020              | 3.72  | 2.14 | 6.43  | 2.72     |
| Alser et al., 2021                | 4.18  | 2.13 | 8.17  | 2.38     |
| Altschul et al., 2020             | 2.4   | 1.18 | 5.16  | 2.78     |
| Amanat et al., 2021               | 8.79  | 4.94 | 15.62 | 1.56     |
| Azar et al., 2020                 | 14.17 | 5.98 | 33.55 | 0.40     |
| Baggio et al., 2021               | 11.87 | 10.5 | 13.36 | 2.96     |
| Barbui et al., 2021               | 11.05 | 2.55 | 47.81 | 0.16     |
| Berenguer et al., 2020            | 7.53  | 6.03 | 9.41  | 2.88     |
| Bossini et al., 2020              | 1.12  | 1.03 | 1.24  | 3.17     |
| Caillard et al., 2020             | 3.93  | 2.27 | 6.79  | 2.68     |
| Chand et al., 2020                | 2.15  | 1.35 | 3.42  | 3.06     |
| Dagher et al., 2021               | 2.46  | 1.35 | 6.63  | 2.53     |
| Deng G et al., 2020               | 9.98  | 8.53 | 11.69 | 2.91     |
| Del Amo et al., 2020              | 4.64  | 1.81 | 11.98 | 1.64     |
| Di Cosimo et al., 2021            | 2.92  | 1.14 | 7.5   | 2.32     |
| Elhadi et al., 2021               | 2.28  | 1.53 | 3.39  | 3.08     |
| Ferrari et al., 2020              | 3.1   | 1.1  | 9.7   | 1.90     |
| Grasselli et al., 2020            | 3.29  | 2.52 | 4.3   | 3.09     |
| Gupta et al., 2020                | 2.91  | 2.41 | 3.51  | 3.14     |
| Haq et al., 2020                  | 2.7   | 0.5  | 14    | 1.19     |
| Hatami et al., 2021               | 2.68  | 1.74 | 4.14  | 3.02     |
| Imam Z et al., 2020               | 1.93  | 1.26 | 2.94  | 3.10     |
| Islam et al., 2020                | 7.55  | 3.19 | 17.92 | 1.07     |
| Jegede et al., 2020               | 7.93  | 2.91 | 21.59 | 0.76     |
| Krause et al., 2020               | 9.45  | 1.43 | 62.31 | 0.09     |
| Long et al., 2020                 | 2.66  | 0.83 | 8.47  | 2.07     |

|                                                                 |             |             |             |               |
|-----------------------------------------------------------------|-------------|-------------|-------------|---------------|
| Martinez-Lopez et al., 2020                                     | 3           | 1.4         | 8.4         | 2.20          |
| Murthy et al., 2021                                             | 3.69        | 2.37        | 5.74        | 2.88          |
| Nachega et al., 2020                                            | 6.86        | 4.43        | 10.64       | 2.35          |
| Nikpouraghdam et al., 2020                                      | 3.09        | 2.33        | 4.09        | 3.09          |
| Oto et al., 2021                                                | 2.74        | 0.81        | 9.27        | 1.92          |
| Passamonti et al., 2020                                         | 3.17        | 2.01        | 4.98        | 2.94          |
| Pineiro et al., 2021                                            | 4.16        | 0.65        | 26.6        | 0.45          |
| Pongpirul et al., 2020                                          | 3.24        | 1.24        | 8.48        | 2.15          |
| Ramaswamy et al., 2020                                          | 1.9         | 0.66        | 5.65        | 2.59          |
| Richardson et al., 2020                                         | 4.14        | 3.27        | 5.24        | 3.07          |
| Rivera-Izquierdo et al., 2020                                   | 6.53        | 1.88        | 22.7        | 0.64          |
| Verity et al., 2020                                             | 9.98        | 8.53        | 11.69       | 2.91          |
| Wang D et al., 2020                                             | 18.12       | 4.79        | 68.57       | 0.08          |
| Yang K et al., 2020                                             | 0.97        | 0.48        | 1.96        | 3.11          |
| Zhang S et al., 2020                                            | 4.63        | 2.99        | 7.18        | 2.74          |
| Zhao M et al., 2020                                             | 4.11        | 2.58        | 6.56        | 2.78          |
| Zou X et al., 2020                                              | 6.44        | 2.76        | 15.03       | 1.34          |
| <b>Total (I squared=95.7%, p&lt;0.01)</b>                       | <b>4.32</b> | <b>3.39</b> | <b>5.25</b> | <b>100.00</b> |
| <b>Age in years <math>\geq 65</math> vs <math>&lt;65</math></b> |             |             |             |               |
| Acar et al., 2020                                               | 4.77        | 2.9         | 7.86        | 2.51          |
| Albalawi et al., 2021                                           | 5.2         | 1.74        | 15.49       | 0.88          |
| Aliberti et al., 2021                                           | 2.27        | 1.82        | 2.85        | 3.42          |
| Almaghlouth et al., 2020                                        | 3.2         | 0.58        | 17.6        | 0.63          |
| Attauabi et al., 2021                                           | 4.82        | 1.22        | 24.22       | 0.38          |
| Auld et al., 2020                                               | 4.06        | 2.12        | 7.77        | 2.32          |
| Betech et al., 2020                                             | 1.28        | 0.84        | 1.94        | 3.41          |
| Bezzio et al., 2020                                             | 19.6        | 2.95        | 130.6       | 0.01          |
| Castelnuovo et al., 2020                                        | 8.71        | 6.84        | 11.09       | 2.71          |
| Catteau et al., 2020                                            | 7.74        | 6.63        | 9.04        | 3.19          |
| Cen et al., 2020                                                | 6.62        | 3.14        | 13.97       | 1.23          |
| Ciceri et al., 2020                                             | 6.08        | 3.47        | 10.65       | 1.93          |
| De Souza et al., 2021                                           | 4.06        | 2.72        | 6.05        | 2.96          |
| Du et al., 2020b                                                | 3.76        | 1.14        | 17.39       | 0.68          |
| Duarte et al., 2020                                             | 1.3         | 0.93        | 1.82        | 3.43          |
| Giannoglou et al., 2020                                         | 8.22        | 3.88        | 17.42       | 0.90          |
| Grasselli et al., 2020                                          | 3.49        | 3.07        | 3.98        | 3.43          |
| Gu et al., 2020                                                 | 8.77        | 5.34        | 14.41       | 1.52          |
| Halvatsiotis et al., 2020                                       | 0.65        | 0.25        | 1.62        | 3.38          |
| Kim E et al., 2021                                              | 1.88        | 0.81        | 4.39        | 2.90          |
| Laake et al., 2020                                              | 3.44        | 1.99        | 5.96        | 2.79          |
| Lee Y et al., 2020                                              | 4.96        | 2.65        | 9.3         | 2.06          |
| Li K et al., 2020                                               | 4.17        | 1.34        | 13.02       | 1.11          |
| Lievre et al., 2020                                             | 1.68        | 1.3         | 2.16        | 3.44          |
| Lucar et al., 2021                                              | 0.59        | 0.11        | 3.24        | 3.02          |
| Lunski et al., 2021                                             | 5.96        | 4.71        | 7.54        | 3.09          |
| Mato et al., 2020                                               | 2.05        | 1.05        | 4.02        | 3.06          |

|                                            |             |             |             |               |
|--------------------------------------------|-------------|-------------|-------------|---------------|
| Pascual et al., 2020                       | 6           | 1.02        | 35.38       | 0.18          |
| Pinato et al., 2020                        | 3.07        | 1.5         | 6.25        | 2.57          |
| Rastad et al., 2021                        | 1.62        | 0.6         | 4.41        | 2.84          |
| Ren et al., 2020                           | 20.96       | 3.69        | 119.16      | 0.02          |
| Rosenthal et al., 2020                     | 8.07        | 7.62        | 8.55        | 3.43          |
| Santos et al., 2020                        | 1.08        | 0.1         | 11.76       | 1.12          |
| Shahriarirad et al., 2020                  | 1.58        | 0.37        | 6.78        | 2.12          |
| Wang Sufei et al., 2020                    | 3.61        | 2.37        | 5.5         | 3.02          |
| Wang Tao et al., 2020                      | 1.03        | 0.98        | 1.07        | 3.48          |
| Xu Jiqian et al., 2020                     | 2.61        | 1.51        | 4.49        | 3.05          |
| Yang D et al., 2020                        | 3.26        | 1.79        | 5.94        | 2.74          |
| Yang R et al., 2020                        | 5.91        | 2.46        | 14.19       | 1.11          |
| Yao et al., 2020                           | 7.72        | 2.11        | 28.18       | 0.30          |
| Yarza et al., 2020                         | 1.59        | 0.5         | 4.99        | 2.65          |
| Ye et al., 2020                            | 9.95        | 5.76        | 17.29       | 1.13          |
| Yu, Caizheng et al., 2020                  | 2.11        | 1.39        | 3.21        | 3.31          |
| Zeng H. et al., 2020                       | 2.62        | 1.57        | 4.38        | 3.10          |
| <b>Total (I squared= 96.7%, p&lt;0.01)</b> | <b>3.51</b> | <b>2.76</b> | <b>4.26</b> | <b>100.00</b> |
| <b>Age in years continuous</b>             |             |             |             |               |
| Akhtar et al., 2021                        | 1.11        | 1.07        | 1.16        | 1.99          |
| Aloisio et al., 2020                       | 1.14        | 1.03        | 1.27        | 0.55          |
| Angelidi et al., 2021                      | 1.81        | 1.05        | 3.13        | 0.01          |
| Angelis et al., 2020                       | 1.06        | 1.02        | 1.09        | 2.39          |
| Annweiler et al., 2020                     | 1.05        | 0.88        | 1.25        | 0.26          |
| Bartoletti et al., 2020                    | 1.06        | 1.03        | 1.09        | 2.61          |
| Bianchetti et al., 2020                    | 1.09        | 1.07        | 1.12        | 2.82          |
| Bielza et al., 2021                        | 1.01        | 0.98        | 1.03        | 2.82          |
| Botta et al., 2021                         | 2.19        | 1.65        | 2.9         | 0.02          |
| Brenner et al., 2020                       | 1.07        | 1.03        | 1.11        | 2.19          |
| Brouns et al., 2020                        | 1.04        | 0.39        | 2.77        | 0.01          |
| Cabezudo-García et al., 2020               | 1.07        | 1.04        | 1.09        | 2.82          |
| Caliskan et al., 2020                      | 1.08        | 1.05        | 1.11        | 2.61          |
| De Smet D et al., 2021                     | 1.09        | 1.03        | 1.14        | 1.65          |
| De Smet R et al., 2020                     | 1.13        | 1.02        | 1.33        | 0.35          |
| Duclos et al., 2021                        | 1.23        | 1.06        | 1.43        | 0.26          |
| Ferrando et al., 2020                      | 1.05        | 1.01        | 1.09        | 2.19          |
| Fox et al., 2020                           | 1.03        | 1           | 1.07        | 2.39          |
| Frontera et al., 2020                      | 1.05        | 1.03        | 1.07        | 3.02          |
| Galiero et al., 2020                       | 1.05        | 1.02        | 1.07        | 2.82          |
| Gomez et al., 2021                         | 1.05        | 1.04        | 1.07        | 3.20          |
| González-Gancedo et al., 2021              | 1.09        | 1.07        | 1.19        | 1.50          |
| Guarneri et al., 2021                      | 1.03        | 1           | 1.05        | 2.82          |
| Hashemi et al., 2020                       | 1.08        | 1.05        | 1.12        | 2.39          |
| Hendra et al., 2021                        | 1.05        | 1           | 1.1         | 1.81          |
| Huang S et al., 2020                       | 1.04        | 1.02        | 1.06        | 3.02          |
| Jose et al., 2021                          | 1.04        | 1.02        | 1.06        | 3.02          |

|                                           |             |              |              |               |
|-------------------------------------------|-------------|--------------|--------------|---------------|
| Karahan et al., 2020                      | 1.01        | 0.06         | 1.03         | 0.04          |
| Krishnamoorthy et al., 2021               | 1.06        | 1.04         | 1.08         | 3.02          |
| Krishnan et al., 2020                     | 1.08        | 1.04         | 1.12         | 2.19          |
| Lee L et al., 2020                        | 1.67        | 1.19         | 2.34         | 0.03          |
| Lee S et al., 2020                        | 1.06        | 1.05         | 1.07         | 3.34          |
| Leung et al., 2020                        | 1.04        | 1            | 1.1          | 1.81          |
| Llamas et al., 2021                       | 1.06        | 1.01         | 1.1          | 1.99          |
| Mak et al., 2020                          | 1.11        | 1.09         | 1.13         | 3.02          |
| Mather et al., 2020                       | 1.06        | 1.04         | 1.08         | 3.02          |
| Messika et al., 2021                      | 1.02        | 0.94         | 1.1          | 1.04          |
| Molinero et al., 2020                     | 1.08        | 1.05         | 1.12         | 2.39          |
| Namendys-Silva, 2021                      | 1.04        | 1.01         | 1.07         | 2.61          |
| Okoh et al., 2020                         | 1.04        | 1.01         | 1.06         | 2.82          |
| Saleh et al., 2021                        | 1.07        | 0.58         | 1.99         | 0.02          |
| Sands et al., 2020                        | 1.07        | 1.06         | 1.08         | 3.34          |
| Sun et al., 2020                          | 1.12        | 1.01         | 1.25         | 0.55          |
| Talavera et al., 2020                     | 1.06        | 1.03         | 1.08         | 2.82          |
| Turgutalp et al., 2021                    | 1.02        | 1            | 1.04         | 3.02          |
| Wargny et al., 2021                       | 1.84        | 1.49         | 2.27         | 0.06          |
| Webb et al., 2020                         | 1.06        | 1.01         | 1.11         | 1.81          |
| Yang C et al., 2021                       | 1.03        | 0.99         | 1.06         | 2.39          |
| Yildirim et al., 2021                     | 1.13        | 0.03         | 1.25         | 0.03          |
| Zhao Y et al., 2020                       | 0.92        | 0.88         | 0.94         | 2.61          |
| Zhou S et al., 2020                       | 1.09        | 1.03         | 1.15         | 1.50          |
| Zhu Y et al., 2021                        | 1.04        | 1.02         | 1.06         | 3.02          |
| <b>Total (I squared=77.8%, p&lt;0.01)</b> | <b>1.06</b> | <b>1.05</b>  | <b>1.07</b>  | <b>100.00</b> |
| <b>Age in years ≥ 50 vs &lt;50</b>        |             |              |              |               |
| Aiswarya et al., 2020                     | 1           | 0.24         | 4.02         | 51.00         |
| Alasia et al., 2021                       | 10.81       | 3.27         | 35.75        | 13.50         |
| Nepogodiev et al., 2020                   | 9.03        | 4.56         | 17.89        | 35.51         |
| <b>Total (I squared= 68.7%, p=0.041)</b>  | <b>5.18</b> | <b>-1.74</b> | <b>12.09</b> | <b>100.00</b> |
| <b>Age in years ≥ 75 vs &lt;75</b>        |             |              |              |               |
| Adamuz et al., 2020                       | 3.04        | 1.79         | 5.15         | 3.31          |
| Becerra-Munoz et al., 2021                | 3.54        | 1.76         | 8.38         | 0.85          |
| De Souza et al., 2020                     | 2.4         | 2.1          | 2.74         | 91.13         |
| Ling et al., 2020                         | 1.71        | 0.8          | 3.7          | 4.44          |
| Sano et al., 2020                         | 1.65        | 0.23         | 11.99        | 0.27          |
| <b>Total (I squared=0.0%, p=0.746)</b>    | <b>2.40</b> | <b>2.09</b>  | <b>2.70</b>  | <b>100.00</b> |
| <b>Age in years ≥ 70 vs &lt;70</b>        |             |              |              |               |
| Kim S et al., 2020                        | 4.77        | 2.21         | 11.05        | 10.71         |
| Maguire et al., 2020                      | 4.49        | 2.33         | 8.64         | 16.08         |
| Nakamura et al., 2020                     | 2           | 0.41         | 9.74         | 9.94          |
| Shi et al., 2020                          | 5.28        | 1.83         | 15.21        | 5.70          |
| Zhang Lin et al., 2020                    | 12.81       | 5.7          | 28.8         | 2.16          |
| Zhong Y et al., 2020                      | 1.83        | 0.66         | 5.07         | 21.91         |
| Zuo P et al., 2020                        | 0.98        | 0.97         | 0.99         | 33.51         |

|                                         |             |             |              |               |
|-----------------------------------------|-------------|-------------|--------------|---------------|
| Chen J et al., 2020a                    | 9.08        | 4.44        | 18.59        | 10.71         |
| <b>Total (I squared= 57.0%, p=0.03)</b> | <b>2.74</b> | <b>0.98</b> | <b>4.492</b> | <b>100.00</b> |
