# Supplementary material for: Heterogeneity and Risk of Bias in Studies Examining Risk Factors for Severe Illness and Death in COVID-19: A Systematic Review and Meta-Analysis
Source: MDPI journal article supplement (doi:10.3390/pathogens11050563), 2022-05-10
Supplement: s1 [file s1]

# **Heterogeneity and risk of bias in studies examining risk factors for severe illness and death in COVID-19: a systematic review and meta-analysis**

Abraham Degarege \*, Zaeema Naveed, Josiane Kabayundo, David Brett-Major

**Table S17: Forest plot showing the relationship of gender with the odds of severe illness among COVID-19 patients**

| <b>Author, year</b>          | <b>OR</b> | <b>LCI</b> | <b>UCI</b> | <b>% Weight</b> |
|------------------------------|-----------|------------|------------|-----------------|
| Adamuz et al., 2020          | 1.2       | 0.87       | 1.67       | 1.55            |
| Aiswarya et al., 2020        | 0.82      | 0.19       | 3.39       | 0.37            |
| Akbariqomi et al., 2020      | 3.05      | 1.29       | 7.23       | 0.12            |
| Alasia et al., 2021          | 1.95      | 0.96       | 3.93       | 0.42            |
| Algado-Sellés et al., 2020   | 4.9       | 1.8        | 13.6       | 0.03            |
| Allard et al., 2020          | 2.04      | 0.85       | 4.85       | 0.25            |
| Allenbach et al., 2020       | 1.34      | 0.65       | 2.77       | 0.68            |
| Alqahtani et al., 2020       | 0.51      | 0.24       | 1.09       | 1.51            |
| Al-Samkari et al., 2020      | 0.61      | 0.41       | 0.93       | 1.77            |
| Alsharidah et al., 2021      | 1.12      | 0.63       | 1.97       | 1.12            |
| Amanat et al., 2021          | 1.38      | 1.03       | 1.86       | 1.52            |
| Bailey et al., 2021          | 0.54      | 0.45       | 0.65       | 1.94            |
| Bauer et al., 2020           | 1.29      | 0.99       | 1.69       | 1.63            |
| Bhargava et al., 2020        | 0.57      | 0.32       | 1.03       | 1.62            |
| Bi et al., 2020              | 2.5       | 1.1        | 6.1        | 0.17            |
| Boero et al., 2020           | 1.25      | 0.73       | 2.14       | 1.07            |
| Bolouri et al., 2021         | 1.33      | 0.94       | 2.67       | 0.87            |
| Bravi et al., 2020           | 1.76      | 1.4        | 2.23       | 1.52            |
| Cai et al., 2020             | 2.34      | 1.44       | 3.81       | 0.58            |
| Çalık Başaran N et al., 2021 | 2.32      | 1.02       | 5.26       | 0.23            |
| Cekerevac et al., 2021       | 1.16      | 0.55       | 2.47       | 0.77            |
| Cen Y et al., 2020           | 1.69      | 1.26       | 2.28       | 1.37            |
| Chaudhry et al., 2020        | 1.61      | 0.28       | 9.23       | 0.06            |
| Chen et al., 2020            | 0.99      | 0.46       | 1.93       | 1.03            |
| Chen J et al., 2020          | 1.14      | 0.97       | 1.34       | 1.86            |
| Chen Q et al., 2020          | 0.94      | 0.46       | 1.93       | 1.03            |
| Chen Z et al., 2020          | 1.71      | 1.21       | 2.44       | 1.20            |
| Cheng et al., 2020           | 1.21      | 0.65       | 2.24       | 0.95            |
| Cizmecioglu et al., 2020     | 1.54      | 0.36       | 6.44       | 0.12            |
| Colaneri et al., 2020        | 2.6       | 0.67       | 10.06      | 0.05            |
| Deng et al., 2020            | 1.79      | 0.83       | 3.84       | 0.41            |
| Derikx et al., 2020          | 2.03      | 0.73       | 5.51       | 0.18            |
| Du et al., 2020a             | 1.26      | 0.56       | 2.84       | 0.61            |
| Duan et al., 2020            | 2.16      | 0.81       | 5.78       | 0.17            |
| Etienne et al., 2020         | 2.36      | 0.69       | 7.97       | 0.08            |
| Feng et al., 2020            | 1.6       | 1.04       | 2.45       | 1.07            |
| Fernandes et al., 2021       | 0.91      | 0.45       | 1.89       | 1.05            |
| Ghaffari et al., 2021        | 0.77      | 0.49       | 1.2        | 1.62            |
| Gong et al., 2020            | 1.64      | 0.73       | 3.7        | 0.42            |
| Guan et al., 2020b           | 0.97      | 0.7        | 1.36       | 1.66            |

|                                     |      |      |       |      |
|-------------------------------------|------|------|-------|------|
| Han et al., 2020                    | 0.94 | 0.54 | 1.65  | 1.29 |
| He et al., 2020                     | 2.52 | 1.8  | 3.54  | 0.86 |
| Hoffmann et al., 2021               | 1.21 | 0.5  | 2.9   | 0.57 |
| Hu F et al., 2021                   | 2.89 | 1.07 | 7.83  | 0.10 |
| Hu L et al., 2020                   | 1.13 | 0.73 | 1.76  | 1.36 |
| Hu X et al., 2021                   | 4.41 | 1.19 | 16.24 | 0.02 |
| Huang R et al., 2020                | 2.29 | 0.86 | 6.07  | 0.16 |
| Huang S et al., 2020                | 1.91 | 1.16 | 3.13  | 0.74 |
| Jang et al., 2020                   | 2.98 | 0.23 | 38.81 | 0.00 |
| Ji et al., 2020                     | 2.07 | 0.98 | 4.34  | 0.34 |
| Ji et al., 2021                     | 0.78 | 0.15 | 4.21  | 0.25 |
| Jinag N et al., 2021                | 1.87 | 1    | 3.52  | 0.53 |
| Kaeuffer et al., 2020               | 2.52 | 1.94 | 3.28  | 1.12 |
| Karahan et al., 2020                | 1.37 | 0.69 | 2.75  | 0.70 |
| Khan et al., 2020                   | 2.02 | 1.22 | 3.34  | 0.68 |
| Lei C et al., 2020                  | 1.93 | 1.05 | 3.56  | 0.54 |
| Lei et al., 2020                    | 1.51 | 1.32 | 1.71  | 1.85 |
| Lei F et al., 2020                  | 1.51 | 1.32 | 1.71  | 1.85 |
| Li H et al., 2020                   | 5.31 | 2.21 | 12.75 | 0.04 |
| Li K et al., 2020                   | 1.5  | 0.57 | 3.88  | 0.35 |
| Li T et al., 2020                   | 1.28 | 0.79 | 2.07  | 1.16 |
| Li X et al., 2020                   | 1.6  | 1.14 | 2.24  | 1.30 |
| Liu J et al., 2021                  | 1.04 | 0.76 | 1.41  | 1.67 |
| Liu S et al., 2020                  | 1.69 | 0.99 | 2.89  | 0.78 |
| Molinero et al., 2020               | 1.73 | 1.17 | 2.57  | 1.08 |
| Nachega et al., 2020                | 1.39 | 0.97 | 1.98  | 1.38 |
| Nguyen et al., 2020                 | 2.01 | 1.34 | 3.04  | 0.89 |
| Nie Y et al., 2020                  | 0.84 | 0.51 | 1.38  | 1.49 |
| Ouldali et al., 2021                | 0.5  | 0.2  | 1.3   | 1.30 |
| Pei et al., 2020                    | 1.78 | 1.15 | 2.76  | 0.94 |
| Pereira et al., 2020                | 1.02 | 0.4  | 2.55  | 0.67 |
| Pereira et al., 2020                | 1.02 | 0.4  | 2.55  | 0.67 |
| Qin C et al., 2020                  | 1.27 | 0.86 | 1.86  | 1.38 |
| Ren et al., 2020                    | 0.54 | 0.25 | 1.15  | 1.47 |
| Sadeghi et al., 2020                | 0.98 | 0.27 | 3.5   | 0.36 |
| Sadeghi-Haddad-Zavareh et al., 2020 | 1.35 | 0.91 | 2     | 1.31 |
| Santus et al., 2020                 | 2.22 | 1.05 | 4.72  | 0.29 |
| Scarfo et al., 2020                 | 0.73 | 0.34 | 1.57  | 1.20 |
| Shah et al., 2020                   | 1.02 | 0.38 | 2.76  | 0.58 |
| Shahriarirad et al., 2020           | 1.04 | 0.29 | 3.78  | 0.32 |
| Shao et al., 2020                   | 0.94 | 0.43 | 2.02  | 0.95 |
| Shi et al., 2020                    | 2.66 | 1.37 | 5.17  | 0.28 |
| Shi et al., 2020                    | 6.8  | 1.44 | 32.2  | 0.00 |
| Siepmann et al., 2020               | 2.77 | 1.1  | 6.99  | 0.13 |

|                            |       |      |       |      |
|----------------------------|-------|------|-------|------|
| Soleimani et al., 2020     | 0.4   | 0.22 | 0.71  | 1.79 |
| Song et al, 2020           | 1.41  | 0.34 | 5.78  | 0.15 |
| Stachura et al., 2021      | 1.07  | 0.47 | 2.41  | 0.76 |
| Stefan et al., 2020        | 0.29  | 0.07 | 1.14  | 1.33 |
| Sun L et al., 2020         | 0.84  | 0.25 | 2.78  | 0.53 |
| Sun S et al., 2020         | 2.23  | 0.9  | 5.1   | 0.23 |
| Tao et al., 2020           | 0.83  | 0.33 | 2.13  | 0.83 |
| Tian et al., 2020          | 1.48  | 0.77 | 2.81  | 0.71 |
| Tian et al., 2020          | 1.46  | 0.85 | 2.51  | 0.91 |
| To et al., 2020            | 1.28  | 0.24 | 6.83  | 0.10 |
| Tong et al., 2020          | 0.7   | 0.16 | 3.13  | 0.42 |
| Vizcarra et al., 2020      | 2.71  | 0.3  | 24.42 | 0.01 |
| Wan et al., 2020           | 0.91  | 0.11 | 1.91  | 0.83 |
| Wang et al., 2020          | 1.62  | 0.56 | 4.71  | 0.24 |
| Wang Fang et al., 2020     | 2.21  | 1.2  | 4.07  | 0.44 |
| Wang Juan et al., 2020     | 0.66  | 0.37 | 1.2   | 1.52 |
| Wang Junhong et al., 2020  | 1.68  | 0.93 | 3.02  | 0.69 |
| Wang Peng et al., 2020     | 1.5   | 0.5  | 4.55  | 0.25 |
| Wang Sijiao et al., 2020   | 2.23  | 0.56 | 8.77  | 0.07 |
| Wang Wen et al., 2021      | 2.27  | 0.85 | 6.1   | 0.16 |
| Wang Wenjun et al., 2021   | 0.85  | 0.71 | 1.02  | 1.89 |
| Wang X et al., 2020        | 1.59  | 1.04 | 2.43  | 1.08 |
| Wei et al., 2020           | 1.73  | 1.05 | 2.85  | 0.83 |
| Wei X et al., 2020         | 1.6   | 1.12 | 2.3   | 1.24 |
| Wei Z et al, 2021          | 0.86  | 0.31 | 2.21  | 0.78 |
| Wu et al., 2020            | 1.016 | 0.6  | 1.7   | 1.30 |
| Xie Y et al., 2020         | 2.03  | 0.72 | 5.73  | 0.17 |
| Xiong S et al., 2020       | 1.01  | 0.46 | 2.22  | 0.85 |
| Xu B et al., 2020          | 1.55  | 0.64 | 3.73  | 0.39 |
| Yang Q et al., 2020        | 1.38  | 0.63 | 3.02  | 0.58 |
| Yayla et al., 2020         | 1.15  | 0.1  | 13.25 | 0.03 |
| Yu et al., 2020            | 4.6   | 1.7  | 12.6  | 0.04 |
| Zachariah et al., 2020     | 0.63  | 0.15 | 2.68  | 0.53 |
| Zhang G et al., 2020       | 1.85  | 0.77 | 4.45  | 0.29 |
| Zhang Hongmei et al., 2020 | 1.46  | 0.54 | 3.96  | 0.33 |
| Zhang Hongyan et al., 2020 | 2.37  | 1.09 | 5.18  | 0.24 |
| Zhang Jing et al., 2020    | 1.22  | 0.92 | 1.62  | 1.63 |
| Zhang KI et al., 2020      | 24.8  | 1.8  | 342.1 | 0.00 |
| Zhang Lijuan et al., 2020  | 3.6   | 0.96 | 13.52 | 0.03 |
| Zhang Nannan et al., 2021  | 3     | 0.33 | 27.06 | 0.01 |
| Zhang Q et al., 2020       | 3.22  | 1.19 | 8.7   | 0.08 |
| Zhang R et al., 2020       | 1.52  | 0.65 | 3.55  | 0.43 |
| Zhang Y et al., 2020       | 3.45  | 1.46 | 8.17  | 0.10 |
| Zhang Y et al., 2021       | 2.61  | 0.84 | 7.45  | 0.10 |
| Zhao J et al., 2021        | 1.28  | 0.8  | 2.04  | 1.19 |

|                                            |             |             |             |               |
|--------------------------------------------|-------------|-------------|-------------|---------------|
| Zheng B et al., 2021                       | 0.8         | 0.38        | 1.69        | 1.14          |
| Zheng T et al., 2020                       | 2.34        | 1.64        | 3.35        | 0.88          |
| Zhou Jun et al., 2021                      | 2.39        | 0.74        | 7.77        | 0.09          |
| Zhou Yiwu et al., 2020                     | 1.2         | 0.63        | 2.3         | 0.90          |
| Zhu B et al., 2020                         | 1.41        | 0.83        | 2.4         | 0.96          |
| Zou et al., 2020                           | 3.36        | 1.31        | 8.61        | 0.08          |
| <b>Total (I squared= 65.2%, p&lt;0.01)</b> | <b>1.26</b> | <b>1.16</b> | <b>1.37</b> | <b>100.00</b> |
