# Supplementary material for: Heterogeneity and Risk of Bias in Studies Examining Risk Factors for Severe Illness and Death in COVID-19: A Systematic Review and Meta-Analysis
Source: MDPI journal article supplement (doi:10.3390/pathogens11050563), 2022-05-10
Supplement: s1 [file s1]

# **Heterogeneity and risk of bias in studies examining risk factors for severe illness and death in COVID-19: a systematic review and meta-analysis**

Abraham Degarege \*, Zaeema Naveed, Josiane Kabayundo, David Brett-Major

**Table S10: Forest plot showing the relationship of chronic respiratory disease with the odds of death among COVID-19 patients**

| <b>Author, year</b>          | <b>OR</b> | <b>LCI</b> | <b>UCI</b> |
|------------------------------|-----------|------------|------------|
| Acar et al., 2020            | 1.71      | 0.85       | 3.41       |
| Alberici et al., 2020        | 1.07      | 0.22       | 4.20       |
| Alser et al., 2021           | 5.06      | 1.83       | 14.00      |
| Altschul et al., 2020        | 1.46      | 1.06       | 2.02       |
| Anaklı et al., 2021          | 1.40      | 0.54       | 3.66       |
| Angelidi et al., 2021        | 6.69      | 1.10       | 40.89      |
| Aoun et al., 2021            | 2.03      | 0.85       | 4.86       |
| Atkins et al., 2020          | 1.91      | 1.10       | 3.32       |
| Attauabi et al., 2021        | 3.96      | 0.85       | 18.71      |
| Auld et al., 2020            | 0.83      | 0.20       | 2.07       |
| Azar et al., 2020            | 7.44      | 3.30       | 16.77      |
| Baggio et al., 2021          | 1.55      | 1.13       | 2.14       |
| Baqui et al., 2020           | 2.52      | 2.02       | 3.12       |
| Barbui et al., 2021          | 1.49      | 0.61       | 3.64       |
| Bartoletti et al., 2020      | 1.88      | 1.16       | 3.90       |
| Berenguer et al., 2020       | 2.35      | 1.98       | 2.77       |
| Bhatt et al., 2021           | 1.20      | 1.07       | 1.33       |
| Bielza et al., 2021          | 0.66      | 0.39       | 1.12       |
| Botta et al., 2021           | 1.70      | 0.86       | 3.36       |
| Brandão et al., 2021         | 5.39      | 1.84       | 15.79      |
| Cabezudo-García et al., 2020 | 1.58      | 0.85       | 2.95       |
| Caillard et al., 2020        | 0.90      | 0.47       | 1.71       |
| Caliskan et al., 2020        | 3.21      | 1.22       | 8.43       |
| Capdevila-Reniu et al., 2021 | 0.58      | 0.18       | 1.88       |
| Castelnuovo et al., 2020     | 2.30      | 1.87       | 2.82       |
| Catteau et al., 2020         | 1.49      | 1.31       | 1.70       |
| Cen et al., 2020             | 2.25      | 0.76       | 6.59       |
| Chen et al., 2021            | 1.72      | 0.80       | 3.71       |
| Chen L et al., 2020          | 4.02      | 1.40       | 11.53      |
| Chen Y et al., 2020          | 4.38      | 1.74       | 11.03      |
| Chilimuri et al., 2020       | 1.22      | 0.71       | 2.11       |
| Choron et al., 2021          | 1.12      | 0.31       | 4.12       |
| Ciceri et al., 2020          | 10.43     | 3.95       | 27.52      |
| Cinar et al., 2021           | 4.95      | 2.08       | 11.80      |
| Covino et al., 2020          | 3.02      | 0.61       | 14.81      |
| Covino et al., 2020          | 2.38      | 0.64       | 8.77       |
| Covino et al., 2020          | 2.27      | 0.50       | 10.21      |
| Covino et al., 2021          | 1.98      | 0.71       | 5.58       |
| De Smet et al., 2020         | 3.61      | 1.18       | 11.08      |
| De Souza et al., 2020        | 1.27      | 0.87       | 1.86       |
| Deeb et al., 2021            | 3.41      | 1.72       | 6.78       |

|                             |       |      |       |
|-----------------------------|-------|------|-------|
| Deng et al., 2020           | 2.91  | 2.02 | 4.18  |
| Du et al., 2020             | 2.54  | 0.71 | 9.08  |
| Duarte et al., 2020         | 1.03  | 0.47 | 2.25  |
| Elhadi et al., 2021         | 0.80  | 0.41 | 1.59  |
| Escosteguy et al., 2021     | 0.15  | 0.04 | 0.63  |
| Falcone et al., 2020        | 4.43  | 2.19 | 8.96  |
| Fava et al., 2020           | 6.48  | 2.08 | 20.20 |
| Ferrando et al., 2020       | 1.07  | 0.48 | 2.42  |
| Fox et al., 2020            | 1.15  | 0.38 | 3.48  |
| Foy et al., 2020            | 16.81 | 5.44 | 51.98 |
| Galiero et al., 2020        | 2.55  | 1.61 | 4.04  |
| Genet et al., 2020          | 0.97  | 0.43 | 2.19  |
| Grasselli et al., 2020      | 2.82  | 1.78 | 4.45  |
| Guan et al., 2020           | 11.53 | 4.36 | 30.45 |
| Gupta et al., 2020          | 1.39  | 0.95 | 2.04  |
| Haase et al., 2020          | 2.15  | 1.21 | 3.81  |
| Halvatsiotis et al., 2020   | 0.81  | 0.15 | 4.27  |
| Haq et al., 2020            | 4.22  | 1.42 | 12.55 |
| Hatami et al., 2021         | 2.09  | 0.63 | 6.92  |
| Hendra et al., 2021         | 1.01  | 0.21 | 18.74 |
| Hu et al., 2020             | 4.00  | 1.11 | 15.50 |
| Huang Y et al., 2020        | 8.40  | 2.48 | 28.37 |
| Hwang et al., 2020          | 8.92  | 1.61 | 49.35 |
| Iaccarino et al., 2020      | 2.43  | 1.54 | 3.83  |
| Imam Z et al., 2020         | 1.86  | 1.30 | 2.64  |
| Incerti et al., 2021        | 3.08  | 2.78 | 3.42  |
| Inciardi et al., 2020       | 4.26  | 0.70 | 25.93 |
| Islam et al., 2020          | 8.14  | 3.53 | 18.74 |
| Jimeno et al., 2020         | 3.70  | 1.40 | 9.80  |
| Jung et al., 2020           | 1.30  | 0.79 | 2.15  |
| Kaeuffer et al., 2020       | 0.90  | 0.50 | 1.50  |
| Kim S et al., 2020          | 2.26  | 0.86 | 5.97  |
| Krishnamoorthy et al., 2021 | 1.37  | 0.76 | 2.47  |
| Laake et al., 2020          | 2.26  | 0.97 | 5.27  |
| Lee L et al., 2020          | 1.80  | 1.00 | 3.27  |
| Lee Y et al., 2020          | 4.52  | 1.85 | 11.02 |
| Li et al., 2020             | 10.86 | 1.15 | 102.7 |
| Li et al., 2020             | 10.86 | 1.15 | 102.7 |
| Li G et al., 2021           | 2.45  | 0.64 | 9.35  |
| Lievre et al., 2020         | 2.15  | 1.48 | 3.14  |
| Liu et al., 2020            | 4.14  | 0.94 | 18.22 |
| Liu et al., 2020            | 0.83  | 0.24 | 2.85  |
| Llamas et al., 2021         | 1.42  | 0.92 | 2.20  |
| Lohia et al., 2021          | 1.36  | 1.08 | 1.72  |
| Lorente et al., 2021        | 2.44  | 1.02 | 11.58 |

|                             |      |      |       |
|-----------------------------|------|------|-------|
| Lorente et al., 2021        | 2.18 | 0.20 | 23.36 |
| Lunski et al., 2021         | 1.34 | 0.96 | 1.88  |
| Maguire et al., 2020        | 1.48 | 0.69 | 3.16  |
| Martinez-Lopez et al., 2020 | 1.33 | 0.54 | 3.29  |
| Martins et al., 2021        | 1.52 | 0.26 | 9.03  |
| Mash et al., 2020           | 1.34 | 0.59 | 3.03  |
| Mato et al., 2020           | 6.70 | 2.47 | 18.18 |
| Mayer et al., 2021          | 1.18 | 0.92 | 1.51  |
| Mehra et al., 2020          | 2.88 | 1.96 | 4.23  |
| Mehta et al., 2021          | 1.02 | 0.99 | 1.05  |
| Mendes et al., 2020         | 0.98 | 0.40 | 2.39  |
| Morrison et al., 2020       | 0.31 | 0.03 | 2.89  |
| Mostaza et al., 2020        | 0.72 | 0.42 | 1.22  |
| Nachega et al., 2020        | 1.39 | 0.47 | 4.11  |
| Nachtigall et al., 2020     | 2.12 | 1.52 | 2.97  |
| Nakamura et al., 2020       | 2.11 | 0.25 | 17.49 |
| Namendys-Silva, 2021        | 2.85 | 0.29 | 28.02 |
| Nepogodiev et al., 2020     | 1.85 | 1.23 | 2.78  |
| Nikpouraghdam et al., 2020  | 2.05 | 0.99 | 4.22  |
| Otero et al., 2021          | 0.91 | 0.22 | 3.77  |
| Ozdemir et al., 2021        | 2.47 | 1.17 | 5.18  |
| Ozturk ey al., 2020         | 2.10 | 1.38 | 3.21  |
| Park et al., 2020           | 1.05 | 0.26 | 4.30  |
| Park et al., 2020           | 4.13 | 1.08 | 15.85 |
| Parlak et al., 2021         | 1.17 | 0.22 | 6.16  |
| Passamonti et al., 2020     | 1.39 | 0.74 | 2.61  |
| Patel et al., 2020          | 1.22 | 0.77 | 1.91  |
| Peiro et al., 2021          | 3.76 | 1.66 | 8.56  |
| Pineiro et al., 2021        | 3.08 | 0.72 | 13.30 |
| Plotnikow et al., 2020      | 0.81 | 0.07 | 9.01  |
| Qin W et al., 2021          | 2.52 | 1.20 | 5.29  |
| Quisi et al., 2020          | 5.05 | 2.08 | 12.25 |
| Raimondi et al., 2021       | 1.98 | 1.04 | 3.97  |
| Rokni et al., 2020          | 3.50 | 1.13 | 10.82 |
| Rosenthal et al., 2020      | 1.16 | 1.08 | 1.26  |
| Salazer et al., 2021        | 1.26 | 0.98 | 1.63  |
| Shahriarirad et al., 2020   | 1.50 | 0.17 | 13.54 |
| Shi et al., 2020            | 2.40 | 0.68 | 8.51  |
| Smith et al., 2020          | 2.70 | 1.52 | 4.79  |
| Soleimani et al., 2020      | 2.50 | 1.03 | 6.09  |
| Tessitore et al., 2021      | 2.00 | 0.94 | 4.30  |
| Tu et al., 2020             | 4.05 | 1.00 | 16.33 |
| Turgutalp et al., 2021      | 2.17 | 1.24 | 3.79  |
| Venturini et al., 2021      | 0.84 | 0.17 | 4.15  |
| Vrillon et al., 2021        | 1.16 | 0.12 | 11.61 |

|                                           |             |             |             |
|-------------------------------------------|-------------|-------------|-------------|
| Vrillon et al., 2021                      | 3.30        | 0.92        | 11.76       |
| Wang et al., 2020                         | 5.37        | 2.17        | 13.29       |
| Wang Junhong et al., 2020                 | 4.34        | 1.34        | 14.04       |
| Wu F et al., 2020                         | 7.56        | 3.67        | 15.57       |
| Xu Jiqian et al., 2020                    | 1.93        | 0.51        | 7.34        |
| Yan et al., 2020                          | 3.09        | 0.83        | 11.48       |
| Yang C et al., 2021                       | 5.50        | 0.98        | 30.92       |
| Zhou S et al., 2020                       | 10.22       | 1.04        | 100.51      |
| Zhou Wei et al., 2021                     | 1.35        | 0.29        | 6.20        |
| Zou X. et al., 2020                       | 4.30        | 1.03        | 17.97       |
| <b>Total (I squared=72.5%, p&lt;0.01)</b> | <b>1.55</b> | <b>1.42</b> | <b>1.68</b> |
