# Supplementary material for: Heterogeneity and Risk of Bias in Studies Examining Risk Factors for Severe Illness and Death in COVID-19: A Systematic Review and Meta-Analysis
Source: MDPI journal article supplement (doi:10.3390/pathogens11050563), 2022-05-10
Supplement: s1 [file s1]

# **Heterogeneity and risk of bias in studies examining risk factors for severe illness and death in COVID-19: a systematic review and meta-analysis**

Abraham Degarege \*, Zaeema Naveed, Josiane Kabayundo, David Brett-Major

Table S18: Heterogeneity analyses of studies that examined the relationship of comorbidities and demography factors with death among COVID-19 patients

| Exposure     | Overall I <sup>2</sup> (p-value) | I <sup>2</sup> from subgroup analyses   |                                        |                                                |                                         |                                                |
|--------------|----------------------------------|-----------------------------------------|----------------------------------------|------------------------------------------------|-----------------------------------------|------------------------------------------------|
|              |                                  | Study design (I <sup>2</sup> , p-value) | Sample size (I <sup>2</sup> , p-value) | Study area /country (I <sup>2</sup> , p-value) | Income group (I <sup>2</sup> , p-value) | Year of publication (I <sup>2</sup> , p-value) |
| Hypertension | 77.3 (<0.01)                     | CS (84.9%, <0.01)                       | ≤500 (24.5%, p=0.009)                  | China (72.7%, <0.01)                           | Middle (79.1%, <0.01)                   | 2020 (76.4%, <0.01)                            |
|              |                                  | P (60.9%, <0.01)                        | 501 to 1499 (75.8%, <0.01)             | Italy (85.0%, <0.01)                           | High (73.2%, <0.01)                     | 2021 (77.1%, <0.01)                            |
|              |                                  | R (77.5%, <0.01)                        | 1500 to 3000 (80.4%, <0.01)            | USA (86.8%, <0.01)                             |                                         |                                                |
|              |                                  |                                         | 3001 to 5000 (93.0%, <0.01)            | Iran (0.0%, <0.01)                             |                                         |                                                |
|              |                                  |                                         | 5001 to 10000 (81.8%, <0.01)           | UK (0.0%, p= 0.587)                            |                                         |                                                |
|              |                                  |                                         | 10001 to 50000 (98.6%, <0.01)          | Brazil (36.0%, p= 0.196)                       |                                         |                                                |
|              |                                  |                                         | 500001 to 100000 (96.7%, <0.01)        | Spain (54.5%, p= 0.002)                        |                                         |                                                |
|              |                                  |                                         |                                        | Turkey (53.1%, p= 0.030)                       |                                         |                                                |
|              |                                  |                                         |                                        | Korea (0.0%, p= 0.788)                         |                                         |                                                |
|              |                                  |                                         |                                        | France (68.8%, <0.01)                          |                                         |                                                |
| Cancer       | 85.1 (<0.01)                     | CS (0.0%, p=0.622)                      | ≤500 (0.0%, p= 0.977)                  | China (17.0%, p= 0.259)                        | Middle (89.8%, p<0.01)                  | 2020 (16.1%, p= 0.162)                         |
|              |                                  | P (0.0%, p= 0.728)                      | 501 to 1499 (75.8%, p<0.01)            | Italy (0.0%, p=0.625)                          | High (4.6%, p= 0.396)                   | 2021 (93.8%, p<0.01)                           |
|              |                                  | R (88.3%, <0.01)                        | 1500 to 3000 (10.0%, p=0.329)          | USA (72.6%, p<0.01)                            |                                         |                                                |
|              |                                  |                                         | 3001 to 5000 (37.3%, p=0.188)          | UK (0.0%, p=0.943)                             |                                         |                                                |
|              |                                  |                                         | 5001 to 10000 (95.8%, p<0.01)          | Spain (0.0%, p=0.810)                          |                                         |                                                |
|              |                                  |                                         | 10001 to 50000 (47.2%, p= 0.108)       | France (90.8%, p<0.01)                         |                                         |                                                |
|              |                                  |                                         | 500001 to 100000 (76.8%, p= 0.002)     | Turkey (0.0%, p=0.637)                         |                                         |                                                |
| Diabetes     | 95.5% (<0.01)                    | CS (99.4%, p<0.01)                      | ≤500 (7.2%, p= 0.258)                  | China (57.9%, p<0.01)                          | Middle (97.1%, p<0.01)                  | 2020 (96.8%, p<0.01)                           |
|              |                                  | P (45.6%, p= 0.001)                     | 501 to 1499 (32.3%, 0.017)             | Italy (43.3%, p=0.015)                         | High (82.6%, p<0.01)                    | 2021 (69.5%, p<0.01)                           |
|              |                                  | R (70.0%, p<0.01)                       | 1500 to 3000 (67.4%, p= 0.001)         | USA (67.4%, p<0.01)                            |                                         |                                                |
|              |                                  |                                         | 3001 to 5000 (87.7%, p<0.01)           | UK (99.6%, p<0.01)                             |                                         |                                                |
|              |                                  |                                         | 5001 to 10000 (87.5%, p<0.01)          | Spain (58.5%, p<0.01)                          |                                         |                                                |
|              |                                  |                                         | 10001 to 50000 (94.2%, p<0.01)         | France (42.2%, p=0.086)                        |                                         |                                                |
|              |                                  |                                         | 500001 to 100000 (99.9%, p<0.01)       | Turkey (45.4%, p=0.050)                        |                                         |                                                |
|              |                                  |                                         |                                        | Iran (0.0%, p=0.574)                           |                                         |                                                |

|                           |               |                     |                                  |                          |                        |                       |
|---------------------------|---------------|---------------------|----------------------------------|--------------------------|------------------------|-----------------------|
|                           |               |                     |                                  | Brazil (96.1%, p<0.01)   |                        |                       |
| Ages (≥60 vs. <60 years)  | 95.7% (<0.01) | CS (95.9%, p<0.01)  | ≤500 (43.6%, p= 0.014)           | China (95.6%, p<0.01)    | Middle (87.1%, p<0.01) | 2020 (93.1%, p<0.01)  |
|                           |               | P (64.3%, p< 0.01)  | 501 to 1499 (60.3%, p=0.005)     | Italy (90.3%, p<0.01)    | High (95.5%, p<0.01)   | 2021 (95.9%, p<0.01)  |
|                           |               | R (67.3%, p<0.01)   | 1500 to 3000 (0.0%, p= 0.754)    | USA (54.6%, p=0.024)     |                        |                       |
|                           |               |                     | 5001 to 10000 (91.3%, p=0.01)    | Spain (21.6%, p=0.271)   |                        |                       |
|                           |               |                     | 10001 to 50000 (98.6%, p<0.01)   | Iran (41.8%, p= 0.161)   |                        |                       |
|                           |               |                     | 500001 to 100000 (0.0%, p=1.00)  |                          |                        |                       |
|                           |               |                     |                                  |                          |                        |                       |
| Age (≥ 65 vs. < 65 years) | 96.7% (<0.01) | P (92.7%, p< 0.01)  | ≤500 (50.9%, p= 0.002)           | China (75.1%, p<0.01)    | Middle (97.0%, p<0.01) | 2020 (97.2%, p<0.01)  |
|                           |               | R (95.4%, p<0.01)   | 501 to 1499 (69.2%, p<0.01)      | Italy (87.5%, p<0.01)    | High (78.9%, p<0.01)   | 2021 (79.9%, p<0.01)  |
|                           |               |                     | 5001 to 10000 (97.8%, p<0.01)    | USA (98.4%, p<0.01)      |                        |                       |
| Gender                    | 89.3% (<0.01) | CS (91.5%, p<0.01)  | ≤500 (31.7%, p<0.01)             | China (96.5%, p<0.01)    | Middle (64.3%, p<0.01) | 2020 (76.5%, p<0.01)  |
|                           |               | P (58.1%, p= 0.001) | 501 to 1499 (50.4%, p<0.01)      | Italy (2.7%, p= 0.424)   | High (94.6%, p<0.01)   | 2021 (85.4%, p<0.01)  |
|                           |               | R (90.9%, p<0.01)   | 1500 to 3000 (0.0%, p= 0.670)    | USA (75.3%, p<0.01)      |                        |                       |
|                           |               |                     | 3001 to 5000 (79.1%, p<0.01)     | UK (59.1%, p=0.007)      |                        |                       |
|                           |               |                     | 5001 to 10000 (93.8%, p<0.01)    | Spain (68.3%, p<0.01)    |                        |                       |
|                           |               |                     | 10001 to 50000 (90.4%, p<0.01)   | France (42.2%, p=0.086)  |                        |                       |
|                           |               |                     | 500001 to 100000 (90.8%, p<0.01) | Turkey (27.9%, p= 0.196) |                        |                       |
|                           |               |                     |                                  | Iran (0.0%, p=0.817)     |                        |                       |
|                           |               |                     |                                  | Brazil (96.0%, p<0.01)   |                        |                       |
| Smoking                   | 96.6% (<0.01) | CS (95.7%, p<0.01)  | ≤500 (67.6%, p<0.01)             | China (0.0%, p=0.827)    | Middle (76.2%, p<0.01) | 2020 (75%, p<0.01)    |
|                           |               | P (99.0%, p= 0.001) | 501 to 1499 (48.4%, p=0.011)     | Italy (54.6%, p= 0.007)  | High (4.1%, p<0.01)    | 2021 (96%, %, p<0.01) |
|                           |               | R (0.6%, p=0.462)   | 1500 to 3000 (0.0%, p= 0.879)    | USA (54.6%, p= 0.007)    |                        |                       |
|                           |               |                     | 3001 to 5000 (79.2%, p=0.001)    | Spain (89.8%, p<0.01)    |                        |                       |
|                           |               |                     | 5001 to 10000 (99.2%, p<0.01)    | Turkey (50.7%, p= 0.087) |                        |                       |
|                           |               |                     | 500001 to 100000 (90.8%, p<0.01) |                          |                        |                       |
| Cardiovascular disease    | 80.2% (<0.01) | CS (87.6%, p<0.01)  | ≤500 (0.0%, p= 0.692)            | China (76.5%, p<0.01)    | Middle (82.6%, p<0.01) | 2020 (82.3%, p<0.01)  |
|                           |               | P (73.5%, p<0.01)   | 501 to 1499 (75.1%, p<0.01)      | Italy (60.0%, p= 0.005)  | High (78.7%, p<0.01)   | 2021 (65.1%, p<0.01)  |
|                           |               | R (72.9%, p<0.01)   | 1500 to 3000 (90.7%, p<0.01)     | USA (2.7%, p= 0.422)     |                        |                       |
|                           |               |                     | 3001 to 5000 (80.4%, p<0.01)     | Spain (74.2%, p<0.01)    |                        |                       |
|                           |               |                     | 5001 to 10000 (95.6%, p<0.01)    | Turkey (50.7%, p= 0.087) |                        |                       |
|                           |               |                     | 500001 to 100000 (96.2%, p<0.01) | Iran (0.0%, p=0.983)     |                        |                       |
|                           |               |                     |                                  | Turkey (0.0%, p=0.458)   |                        |                       |

|                             |               |                    |                                    |                          |                        |                      |
|-----------------------------|---------------|--------------------|------------------------------------|--------------------------|------------------------|----------------------|
|                             |               |                    |                                    | Brazil (93.3%, p<0.01)   |                        |                      |
|                             |               |                    |                                    | UK (19.5%, p= 0.286)     |                        |                      |
| Chronic respiratory disease | 72.5% (<0.01) | CS (88.3%, p<0.01) | ≤500 (15.2%, p= 0.139)             | China (9.8%, p=0.321)    | Middle (78.3%, p<0.01) | 2020 (52.3%, p<0.01) |
|                             |               | P (4.3%, p=0.401)  | 501 to 1499 (36.0%, p=0.021)       | Italy (0.0%, p=0.726)    | High (59.5%, p<0.01)   | 2021 (80.6%, p<0.01) |
|                             |               | R (71.8%, p<0.01)  | 1500 to 3000 (92.1%, p<0.01)       | USA (89.6%, p<0.01)      |                        |                      |
|                             |               |                    | 3001 to 5000 (73.7%, p<0.01)       | Spain (73.8%, p<0.01)    |                        |                      |
|                             |               |                    | 5001 to 10000 (64.1%, p=0.016)     | Turkey (0.0%, p= 0.715)  |                        |                      |
|                             |               |                    | 500001 to 100000 (74.7%, p= 0.008) | Iran (0.0%, p=0.983)     |                        |                      |
| Cerebrovascular disease     | 61.0% (<0.01) | P (0.0%, p=0.590)  | ≤500 (0.0%, p=0.950)               | China (0.0%, p= 0.699)   | Middle (72.3%, p<0.01) | 2020 (5.7%, p=0.387) |
|                             |               | R (68.1%, p<0.01)  | 501 to 1499 (71.3%, p= 0.001)      | Italy (0.0%, p=0.875)    | High (0.0%, p=0.835)   | 2021 (78.2%, p<0.01) |
|                             |               |                    |                                    | USA (92.0%, p<0.01)      |                        |                      |
|                             |               |                    |                                    | Spain (0.0%, p=0.507)    |                        |                      |
| Chronic kidney disease      | 79.2% (<0.01) | CS (78.2%, p<0.01) | ≤500 (43.5%, p<0.01)               | China (58.7%, p=0.001)   | Middle (81.2%, p<0.01) | 2020 (68.9%, p<0.01) |
|                             |               | P (58.5%, p=0.001) | 501 to 1499 (37.0%, p=0.019)       | Italy (64.5%, p<0.01)    | High (74.3%, p<0.01)   | 2021 (84.5%, p<0.01) |
|                             |               | R (80.4%, p<0.01)  | 1500 to 3000 (57.7%, p= 0.037)     | USA (90.6%, p<0.01)      |                        |                      |
|                             |               |                    | 3001 to 5000 (83.7%, p<0.01)       | Spain (69.8%, p<0.01)    |                        |                      |
|                             |               |                    | 5001 to 10000 (92.4%, p<0.01)      | Turkey (0.0%, p= 0.763)  |                        |                      |
|                             |               |                    |                                    | Iran (0.0%, p= 0.668)    |                        |                      |
|                             |               |                    |                                    | Brazil (80.5%, p= 0.002) |                        |                      |
|                             |               |                    |                                    | UK (56.1%, p= 0.058)     |                        |                      |

CS: cross-sectional; P: prospective; R: Retrospective
