# Supplementary material for: Heterogeneity and Risk of Bias in Studies Examining Risk Factors for Severe Illness and Death in COVID-19: A Systematic Review and Meta-Analysis
Source: MDPI journal article supplement (doi:10.3390/pathogens11050563), 2022-05-10
Supplement: s1 [file s1]

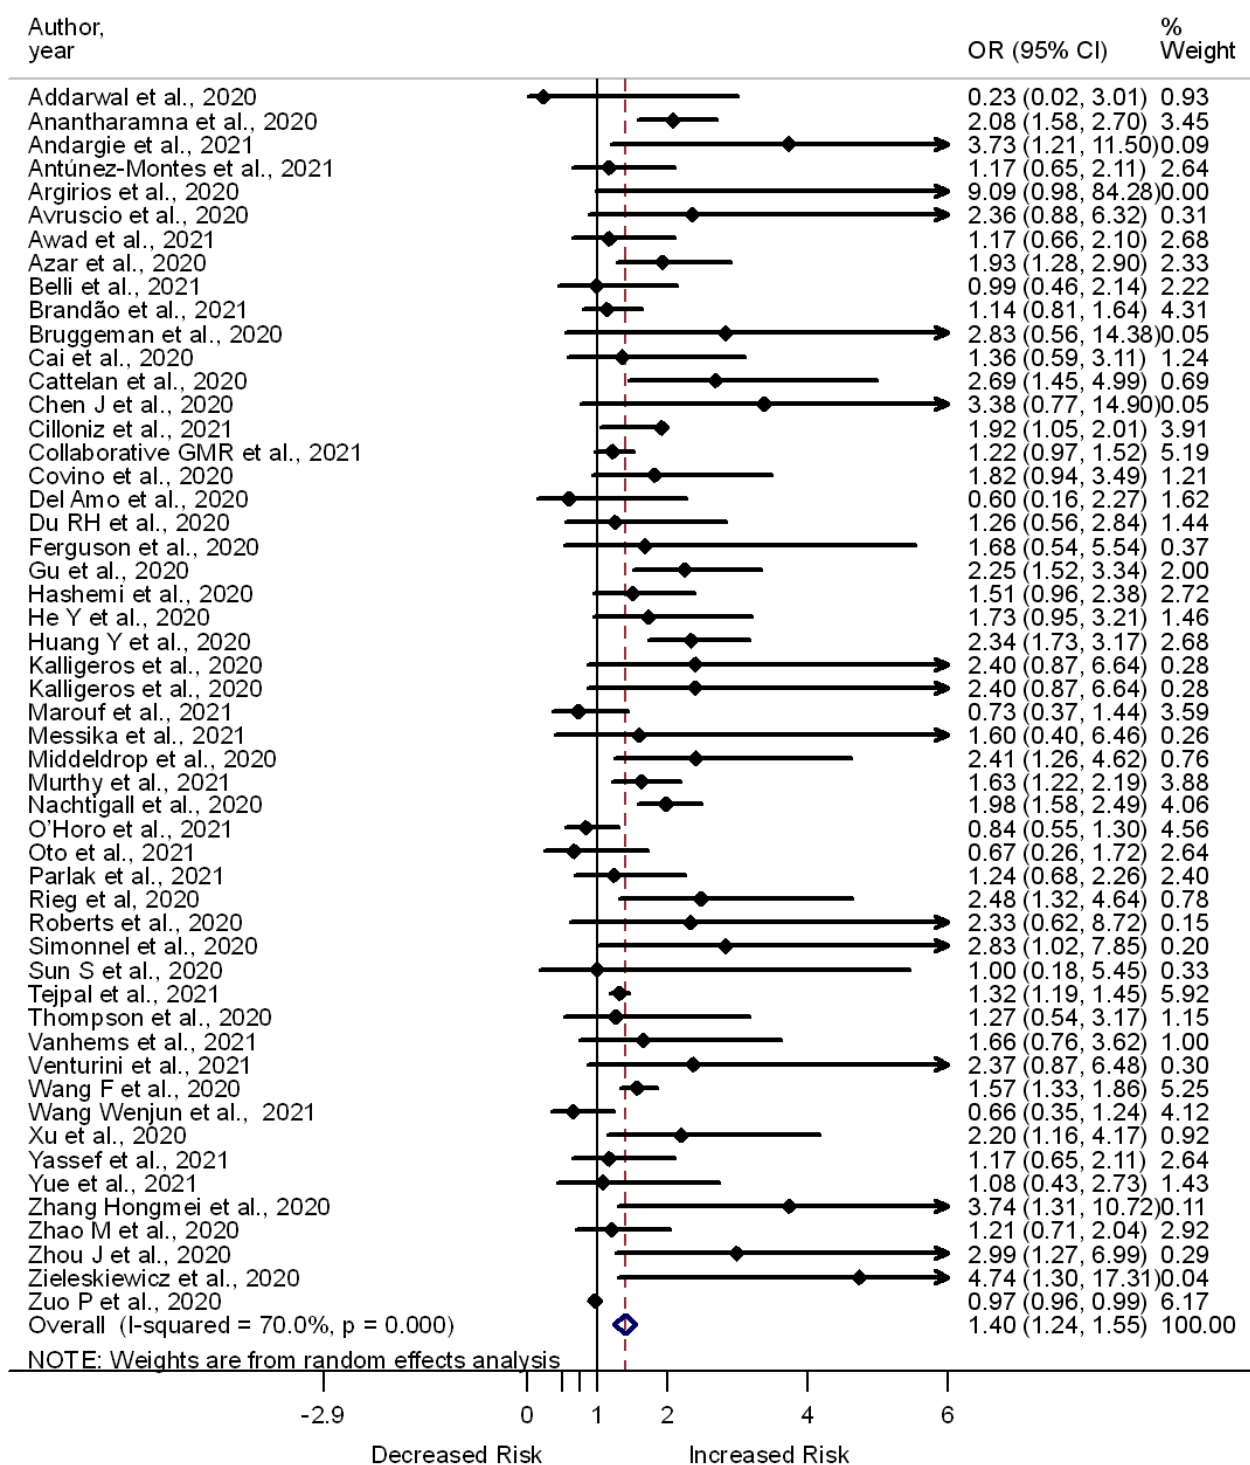

Figure S6: Forest plot showing the relationship of gender with the odds of admission to the ICU among COVID-19 patients
