# Supplementary material for: Heterogeneity and Risk of Bias in Studies Examining Risk Factors for Severe Illness and Death in COVID-19: A Systematic Review and Meta-Analysis
Source: MDPI journal article supplement (doi:10.3390/pathogens11050563), 2022-05-10
Supplement: s1 [file s1]

# **Heterogeneity and risk of bias in studies examining risk factors for severe illness and death in COVID-19: a systematic review and meta-analysis**

Abraham Degarege \*, Zaeema Naveed, Josiane Kabayundo, David Brett-Major

Table S19: Heterogeneity analyses of studies that examined the relationship of chronic kidney disease and demographic factors with severe illness among COVID-19 patients

| Exposure                  | Overall I <sup>2</sup> (p-value) | I <sup>2</sup> from subgroup analyses   |                                        |                                                |                                         |                                                |
|---------------------------|----------------------------------|-----------------------------------------|----------------------------------------|------------------------------------------------|-----------------------------------------|------------------------------------------------|
|                           |                                  | Study design (I <sup>2</sup> , p-value) | Sample size (I <sup>2</sup> , p-value) | Study area /country (I <sup>2</sup> , p-value) | Income group (I <sup>2</sup> , p-value) | Year of publication (I <sup>2</sup> , p-value) |
| Ages (≥60 vs. <60 years)  | 61.9% (<0.01)                    | CS (0.0%, p= 0.940)                     | ≤500 (16.7%, p= 0.271)                 |                                                | High (0.0%, p= 0.582)                   | 2020 (65.8%, p<0.01)                           |
|                           |                                  | P (0.0%, p= 0.403)                      | 501 to 1499 (84.4%, p<0.01)            | China (67.8%, p<0.01)                          | Middle (72.3%, p<0.01)                  | 2021 (0.0%, p= 0.813)                          |
|                           |                                  | R (70.6%, p<0.01)                       |                                        |                                                |                                         |                                                |
| Age (≥ 65 vs. < 65 years) | 69.5% (<0.01)                    | CS (0.0%, p= 0.571)                     | ≤500 (47.2%, p= 0.007)                 |                                                | High (0.0%, p=0.531)                    | 2020 (50.3%, p=0.002)                          |
|                           |                                  | P (55.2%, p= 0.082)                     | 501 to 1499 (67.2% p= 0.006)           | China (77.0%, p<0.01)                          | Middle (73.5%, p<0.01)                  | 2021 (40.1%, p=0.138)                          |
|                           |                                  | R (71.3%, p<0.01)                       |                                        |                                                |                                         |                                                |
| Gender                    | 65.2% (<0.01)                    | CS (30.4%, p=0.084)                     | ≤500 (15.4%, p= 0.096)                 | China (36.1%, p=0.001)                         | High (76.9%, p<0.01)                    | 2020 (55.5%, p<0.01)                           |
|                           |                                  | P (84.2%, p<0.01)                       | 501 to 1499 (81.2%, p<0.01)            | Italy (0.0%, p= 0.565)                         | Middle (47.3%, p<0.01)                  | 2021 (54.0%, p=0.01)                           |
|                           |                                  | R (50.4%, p<0.01)                       | 1500 to 3000 (85.1%, p<0.01)           | USA (68.0%, p= 0.001)                          |                                         |                                                |
|                           |                                  |                                         |                                        | UK (59.1%, p=0.007)                            |                                         |                                                |
|                           |                                  |                                         |                                        | Spain (3.6%, p=0.375)                          |                                         |                                                |
|                           |                                  |                                         |                                        | France (42.2%, p=0.086)                        |                                         |                                                |
|                           |                                  |                                         |                                        | Turkey (0.0%, p= 0.896)                        |                                         |                                                |
| Chronic kidney            | 76.0% (<0.01)                    |                                         |                                        | Iran (74.8%, p= 0.001)                         |                                         |                                                |
|                           |                                  | CS (64.9%, p=0.022)                     | ≤500 (32.8%, p=0.078)                  | China (28.6%, p=0.131)                         | High (0.0%, p=0.449)                    | 2020 (77.5%, p<0.01)                           |
|                           |                                  | P (44.3%, p= 0.166)                     | 501 to 1499 (0.0%, p= 0.808)           | Iran (88.5%, p<0.01)                           | Middle (64.5%, p<0.01)                  | 2021 (0.0%, p=0.975)                           |
|                           |                                  | R (67.0%, p=0.462)                      | 1500 to 3000 (0.567, p= 0.0%)          | USA (0.0%, p= 0.839)                           |                                         |                                                |

CS: cross-sectional; P: prospective; R: Retrospective
