# Supplementary material for: Heterogeneity and Risk of Bias in Studies Examining Risk Factors for Severe Illness and Death in COVID-19: A Systematic Review and Meta-Analysis
Source: Pathogens. 2022 May 10;11(5):563. doi: 10.3390/pathogens11050563 (PMC9147100; doi:10.3390/pathogens11050563)
Supplement: Supplementary file 1 [file pathogens-11-00563-s001.zip]

Archive with 29 entries (29 files):
- Table S1.pdf
- Table S10.pdf
- Table S11.pdf
- Table S12.pdf
- Table S13.pdf
- Table S14.pdf
- Table S15.pdf
- Table S16.pdf
- Table S17.pdf
- Table S18.pdf
- Table S19.pdf
- Table S2.pdf
- Table S20.pdf
- Table S21.pdf
- Table S22.pdf
- Table S3.pdf
- Table S4.pdf
- Table S5.pdf
- Table S6.pdf
- Table S7.pdf
- Table S8.pdf
- Table S9.pdf
- Figure S3.pdf
- Figure S4.pdf
- Figure S5.pdf
- Figure S6.pdf
- Figure S7.pdf
- Figure S1.pdf
- Figure S2.pdf
